# Supplementary material
Source: Research Square preprint supplement (doi:10.21203/rs.3.rs-10198979/v1)
Supplement: Supplementary file 1 [file 69c0fe628453cd71892bd622.pdf]

# Support Information

## Dichlorotetrazine-Mediated Peptide Cyclodimerization Enables Exponential Expansion and Topological Diversification of Peptide Libraries

Quan Zuo<sup>[a,b,c]</sup>, Quanshu He<sup>[a,b,c]</sup>, Jie Yan<sup>[a,b,c]</sup>, Ximiao Yang<sup>[a,b]</sup>, Hao Tian<sup>[a,b]</sup>, Hongyi Huang<sup>[a,b]</sup>,  
Xin Gao<sup>[a,b]</sup>, Jieting Shen<sup>[a,b]</sup>, Yonghui Hu<sup>[a,b]</sup>, Linger Li<sup>[a,b]</sup>, Minzi Lu<sup>[a,b]</sup>, Rui Wang<sup>\*[a,b]</sup>, Kuan  
Hu<sup>\*[a,b]</sup>

---

[a] Dr. Q. Zuo, Q. He, J. Yan, X. Yang, H. Tian, H. Huang, X. Gao, J. Shen, Y. Hu, L. Li, M. Lu, Prof.  
Dr. R. Wang, Prof. Dr. K. Hu

State Key Laboratory of Bioactive Substance and Function of Natural Medicines

Institute of Materia Medica, Chinese Academy of Medical Sciences and Peking Union Medical

College

Beijing 100050, P. R. China

E-mail: [wangrui@lzu.edu.cn](mailto:wangrui@lzu.edu.cn); [hukuan@imm.ac.cn](mailto:hukuan@imm.ac.cn)

[b] Dr. Q. Zuo, Q. He, J. Yan, X. Yang, H. Tian, H. Huang, X. Gao, J. Shen, Y. Hu, L. Li, M. Lu, Prof.  
Dr. R. Wang, Prof. Dr. K. Hu

Beijing Key Laboratory of Targeted Radiopharmaceutical Development and Translational Nuclear  
Medicine,

Institute of Materia Medica, Chinese Academy of Medical Sciences & Peking Union Medical

College,

Beijing 100050, P. R. China

[c] These authors contributed equally to this work.

## Table of contents

|                                                                                                                                              |     |
|----------------------------------------------------------------------------------------------------------------------------------------------|-----|
| <b>1. General information</b> .....                                                                                                          | 3   |
| <b>1.1 Reagents</b> .....                                                                                                                    | 3   |
| <b>1.2 Instruments</b> .....                                                                                                                 | 3   |
| <b>2. LC-MS, analytical HPLC and preparative HPLC information</b> .....                                                                      | 3   |
| <b>2.1 UPLC-MS analysis</b> .....                                                                                                            | 3   |
| <b>2.2 Analytical HPLC</b> .....                                                                                                             | 4   |
| <b>2.3 Preparative HPLC</b> .....                                                                                                            | 6   |
| <b>3. Synthesis of peptide substrates</b> .....                                                                                              | 6   |
| <b>4. Development and optimization of the 3,6-DCT mediated cyclodimerization reaction</b> .....                                              | 52  |
| <b>4.1 Calibration for LC-MS yield calculation</b> .....                                                                                     | 52  |
| <b>4.2 Screening of reaction conditions</b> .....                                                                                            | 58  |
| <b>5. Reaction mechanism investigation and structure confirmation</b> .....                                                                  | 66  |
| <b>5.1 Control experiments</b> .....                                                                                                         | 66  |
| <b>5.2 Structure characterization</b> .....                                                                                                  | 83  |
| <b>5.3 Detailed NMR assignment of key residues in B1a and B1b</b> .....                                                                      | 88  |
| <b>6. Sequence determinants impacting the 3,6-DCT mediated cyclodimerization</b> .....                                                       | 90  |
| <b>6.1 Reaction of N-Cys-containing peptides</b> .....                                                                                       | 90  |
| <b>6.2 Calculation of LC-MS yield of monocyclic products</b> .....                                                                           | 111 |
| <b>6.3 Reaction of peptides without N-Cys</b> .....                                                                                          | 116 |
| <b>7. Substrate scope of the 3,6-DCT mediated cyclodimerization reaction</b> .....                                                           | 123 |
| <b>7.1 Substrate scope expansion and validation experiment</b> .....                                                                         | 123 |
| <b>7.2 Circular dichroism assay</b> .....                                                                                                    | 147 |
| <b>7.3 Detailed NMR assignment of key residues in L38, B38a, and B38b</b> .....                                                              | 150 |
| <b>8. Functionalization of tetrazine-containing cyclodimerization products and construction of three FAP-targeted radiotracers</b> .....     | 153 |
| <b>8.1 Construction of three FAP-targeted radiotracers</b> .....                                                                             | 153 |
| <b>8.2 Radiolabeling</b> .....                                                                                                               | 159 |
| <b>8.3 Lipid-water partition coefficient</b> .....                                                                                           | 160 |
| <b>8.4 Western Blot</b> .....                                                                                                                | 161 |
| <b>8.5 Tumor cell line culture and tumor-bearing mouse model establishment</b> .....                                                         | 161 |
| <b>8.6 Small Animal PET/CT Study in Tumor-Bearing Mice</b> .....                                                                             | 162 |
| <b>9. N<sup>2</sup>-level expansion of peptide library throughput and topological diversity via 3,6-DCT mediated cyclodimerization</b> ..... | 166 |
| <b>10. NMR spectrum</b> .....                                                                                                                | 183 |
| <b>11. Reference</b> .....                                                                                                                   | 196 |

## **1. General information**

### **1.1 Reagents**

Commercially available reagents and solvents were purchased from Energy Chemical, J&K Scientific, Innochem or Bidepharm and all these reagents were used directly without further purification unless otherwise noted. All kinds of buffer were purchased from MACKLIN Reagent. RP-HPLC solvents were purchased as HPLC grade from Innochem. Unless stated otherwise, all reactions were carried out in flame-dried glassware. All solvents were purified and dried according to standard methods prior to use. Most peptides were obtained using standard Fmoc SPPS-chemistry, the other peptides were ordered from Genscript Biotech Corporation and Hangzhou Zhuan Tai Biotechnology.

### **1.2 Instruments**

LC-MS spectra were performed on a Waters SQ Detector 2 mass spectrometer coupled to an Acquity ultra-performance liquid chromatography (UPLC) system. Purity analysis was carried out on Waters 2998. Semi-preparative HPLC was carried out on a SHIMADZU Essentia LC-16P using a Waters XBridge® Peptide BEH C18 (5 µm, 19 mm x 150 mm) Column. Small molecule compounds were purified using Biotage IsoleraOne Flash. Additionally, the equipment includes: a constant temperature shaking incubator (model THZ-100) produced by Shanghai Yiheng Scientific Instruments Co., Ltd.; a biosafety cabinet (model MSC1.5) from Thermoscientific in Germany; a constant temperature incubator (model DHP9080B) produced by Shanghai Langxuan Laboratory Equipment Co., Ltd.; a Ge-Ga generator from New Radiomedicine Technology in Chengdu, China; a microPET/CT from Siemens Medical Solutions in Knoxville, Munich, Germany.

## **2. LC-MS, analytical HPLC and preparative HPLC information**

### **2.1 UPLC-MS analysis**

LC-MS was performed on a SQ Detector 2 mass spectrometer coupled to an Acquity highperformance liquid chromatography (UPLC) system, equipped with UPCMA, UPBSM+, and UPSMFTN+. Water (solvent A) and acetonitrile with 0.1% formic acid (solvent B), were used as the mobile phase at a flow rate of 0.3 mL/min.

Low-resolution mass spectrometric measurements were acquired using the following parameters: positive electrospray ionization (ESI), desolvation temperature = 350 °C, source gas flow = 645 L / h, capillary voltage = 3.0 kV, cone voltage = 40 V; negative electrospray ionization (ESI), desolvation temperature = 350 °C, source gas flow = 645 L / h, capillary voltage = 2.2 kV, cone voltage = 50 V.

For UPLC-MS analyses of the reaction mixtures, the photodiode array (PDA/DAD) detector provides two traces simultaneously from a single injection: a full-wavelength total absorbance chromatogram to monitor all UV-active species, and an extracted UV chromatogram at a specific wavelength (220 nm, 270nm, or 285 nm) used for determining the analytical yield of the target products.

#### Following LC methods were used:

**Tab S1.** Method A (Column: Waters ACQUITY UPLC® Peptide BEH C18, 2.1 × 100 mm, 1.7 μm, flow rate 0.3 mL/min)

| Time (min) | Solvent A (%) | Solvent B (%) |
|------------|---------------|---------------|
| 0          | 95            | 5             |
| 5.50       | 45            | 55            |
| 8.00       | 0             | 100           |
| 9.00       | 0             | 100           |
| 9.01       | 95            | 5             |
| 10         | 95            | 5             |

## 2.2 Analytical HPLC

Analytical RP-HPLC analysis was performed on a Waters 2998, equipped with SMFTN-R, and QSM-R. All RP-HPLC analyses were done with 0.1% (v/v) trifluoroacetic acid (TFA) in water (RP-HPLC solvent A) and acetonitrile with 0.1% (v/v) TFA (RP-HPLC solvent B) as mobile phases. Typically, Method B and Method C were used for analytical RP-HPLC analyses.

**Tab S2.** Method B (CHIRALPAK® IC, 4.6 × 250 mm, 5 μm, flow rate 1 mL/min)

| Time (min) | Solvent A (%) | Solvent B (%) |
|------------|---------------|---------------|
| 0          | 95            | 5             |
| 15         | 10            | 90            |

|       |    |     |
|-------|----|-----|
| 15.01 | 0  | 100 |
| 17    | 0  | 100 |
| 17.01 | 95 | 5   |
| 20    | 95 | 5   |

**Tab S3.** Method C (Inertsil ODS-SP, 4.6 × 250 mm, 5 μm, flow rate 1 mL/min)

| Time (min) | Solvent A (%) | Solvent B (%) |
|------------|---------------|---------------|
| 0          | 95            | 5             |
| 25         | 35            | 65            |
| 27         | 5             | 95            |
| 27.01      | 5             | 95            |
| 35         | 95            | 5             |
| 35.01      | 95            | 5             |

**Tab S4.** Method D (Inertsil ODS-SP, 4.6 × 250 mm, 5 μm, flow rate 1 mL/min)

| Time (min) | Solvent A (%) | Solvent B (%) |
|------------|---------------|---------------|
| 0          | 100           | 0             |
| 5          | 100           | 0             |
| 20         | 70            | 30            |
| 25         | 35            | 65            |
| 25.01      | 5             | 95            |
| 27         | 5             | 95            |
| 27.01      | 100           | 0             |
| 35         | 100           | 0             |

**Tab S5.** Method E (CHIRALPAK<sup>®</sup>IC, 4.6 × 250 mm, 5 μm, flow rate 1 mL/min)

| Time (min) | Solvent A (%) | Solvent B (%) |
|------------|---------------|---------------|
| 0          | 90            | 10            |
| 50         | 80            | 20            |
| 50.01      | 0             | 100           |
| 55         | 0             | 100           |
| 55.01      | 95            | 5             |
| 60         | 95            | 5             |

**Tab S6.** Method F (Inertsil ODS-SP, 4.6 × 250 mm, 5 μm, flow rate 1 mL/min)

| Time (min) | Solvent A (%) | Solvent B (%) |
|------------|---------------|---------------|
| 0          | 90            | 10            |
| 20         | 0             | 100           |

|       |    |     |
|-------|----|-----|
| 25    | 0  | 100 |
| 25.01 | 90 | 10  |
| 30    | 90 | 10  |

## 2.3 Preparative HPLC

Purification of peptides on a semi-preparative scale was performed on a SHIMADZU Essentia LC-16P using a Waters XBridge® Peptide BEH C18 (5  $\mu$ m, 19 mm x 150 mm) Column at a flow rate of 6-8 mL/min. All peptides were separated by RP-HPLC using acetonitrile with 0.1% (v/v) TFA and water as mobile phases.

## 3. Synthesis of peptide substrates

Peptide substrates mainly include unprotected long peptides which are obtained mainly by solid-phase synthesis.

### Solid-Phase Peptide Synthesis (SPPS):

Peptide synthesis was carried out manually using standard Fmoc SPPS-chemistry and CTC resin. CTC resin (1.0 equiv., 0.1 mmol) pre-swollen 30 min in CH<sub>2</sub>Cl<sub>2</sub> (20 mL). Fmoc-amino acids (2.0 equiv.) was coupled to the resin using HBTU (4.0 equiv.) and DIEA (8.0 equiv.) in CH<sub>2</sub>Cl<sub>2</sub> (20 mL, r.t., 1.5 h). After Fmoc deprotection with 20% piperidine/DMF (15 min) and washing (alternating DMF/CH<sub>2</sub>Cl<sub>2</sub>, 3 times each). Subsequent amino acids were coupled sequentially using HBTU/DIEA in DMF (r.t., 1.5 h per cycle). Kaiser tests confirmed complete deprotection after each step. The remaining steps mainly refer to the literature<sup>1</sup>.

### Peptide cleavage and deprotection:

Peptides were deprotected and cleaved from the resin under reducing conditions, by treatment with 2.5% v/v water and 2.5% v/v triisopropylsilane in neat trifluoroacetic acid (40 mL). For cysteine-containing peptides, the cleavage conditions typically involve TFA: Tris: Water: EDT, v:v= 92.5%: 2.5%: 2.5%: 2.5%. The resulting mixture was shaken for 3 hours, at room temperature. The resin was removed by filtration and peptides were precipitated in cold diethyl ether (50 mL). Peptides were pelleted by centrifugation at 4000 rpm, at 4 °C, for 5 minutes. Finally, the mother liquors were carefully removed and crude peptides were dried under vacuum.

### Peptide purification and analyses:

Peptides were dissolved in water with a minimum amount of organic co-solvent (acetonitrile, dimethylformamide or dimethyl sulfoxide). Peptides were then purified

on preparative RP-HPLC. Fractions containing the desired peptide were lyophilized. The purity was assessed by analyzing using Method C, and low-resolution mass (LRMS) measurements were also acquired using Method A.

**Characterization of oligopeptides and long peptides:**

**H-Cys-Arg-Gly-Asp-{D-Pro}-Pro-Arg-Gly-Asp-Cys-OH (L1).** Analytical HPLC using Method C, RT = 5.650 min, the HPLC purity is 95%.

**<Chromatogram>**

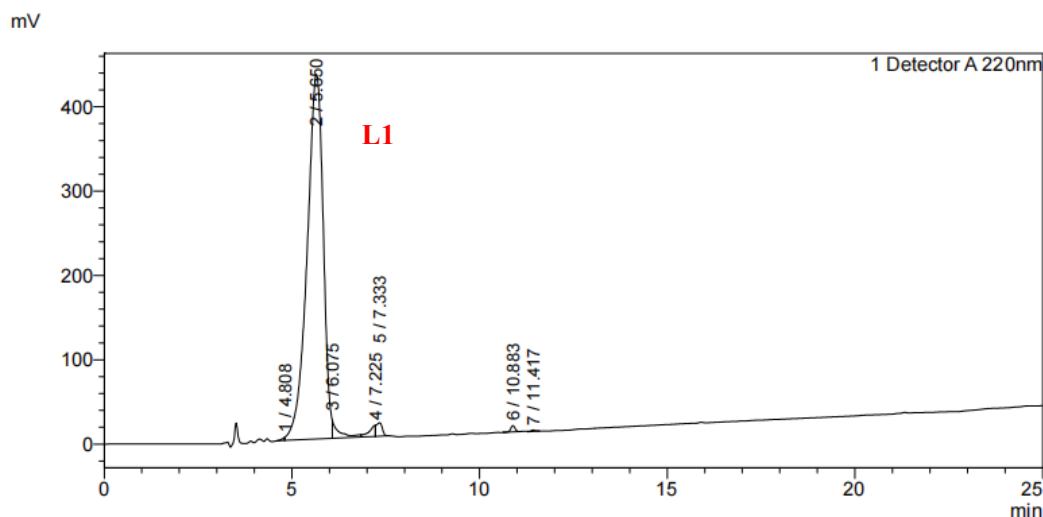

**<Peak Table>**

| Detector A 220nm |           |          |        |         |
|------------------|-----------|----------|--------|---------|
| Peak#            | Ret. Time | Area     | Height | Area%   |
| 1                | 4.808     | 17454    | 3731   | 0.129   |
| 2                | 5.650     | 12880409 | 432551 | 95.061  |
| 3                | 6.075     | 255649   | 21829  | 1.887   |
| 4                | 7.225     | 146419   | 13036  | 1.081   |
| 5                | 7.333     | 178123   | 15895  | 1.315   |
| 6                | 10.883    | 58648    | 7423   | 0.433   |
| 7                | 11.417    | 12988    | 1545   | 0.096   |
| Total            |           | 13549690 | 496009 | 100.000 |

**Fig S1.** HPLC-UV chromatogram at 220 nm of L1.

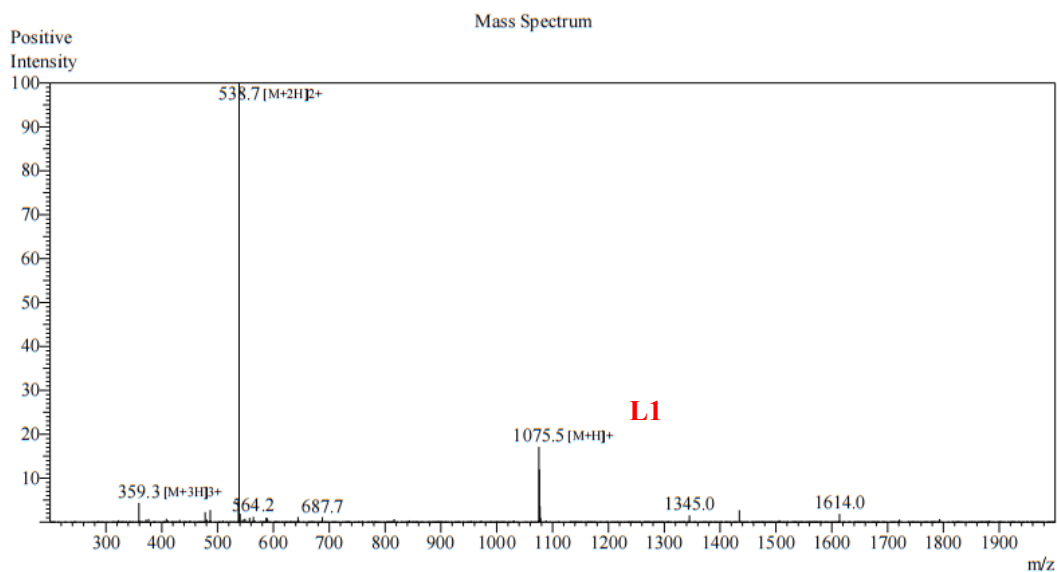

**Fig S2.** ESI-MS spectrum of **L1**. LRMS (ES+) m/z: [M+H]<sup>+</sup> calcd for C<sub>40</sub>H<sub>66</sub>N<sub>16</sub>O<sub>15</sub>S<sub>2</sub> 1075.4, found 1075.5.

**Ac-Cys-Arg-Gly-Asp-{D-Pro}-Pro-Arg-Gly-Asp-Cys-OH (L2).** Analytical HPLC using Method C, RT = 9.342 min, the HPLC purity is 96%.

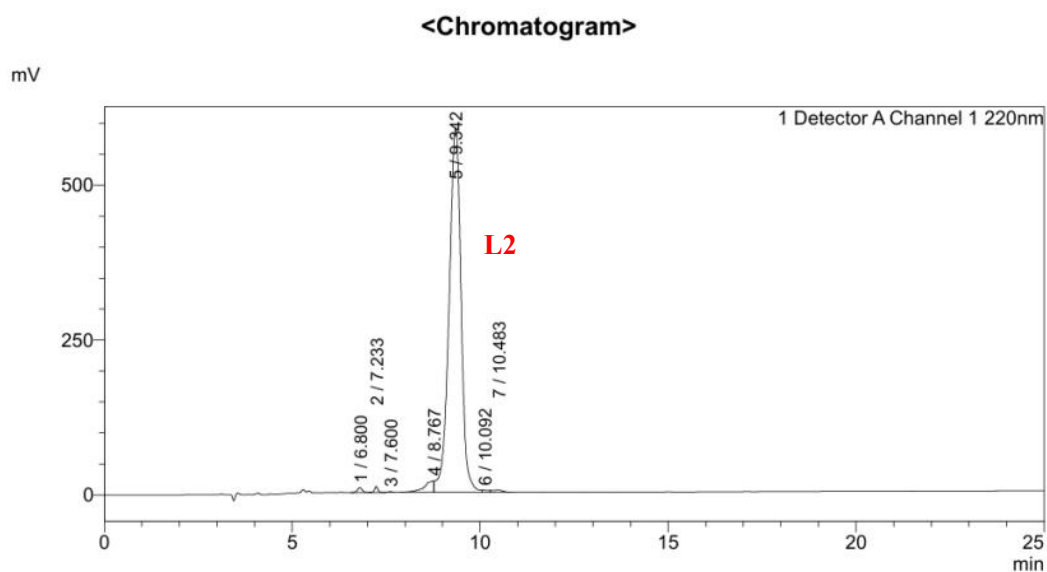

**<Peak Table>**

Detector A Channel 1 220nm

| Peak# | Ret. Time | Area     | Height | Area%   |
|-------|-----------|----------|--------|---------|
| 1     | 6.800     | 76401    | 8023   | 0.561   |
| 2     | 7.233     | 60777    | 9744   | 0.446   |
| 3     | 7.600     | 6756     | 1248   | 0.050   |
| 4     | 8.767     | 322911   | 18362  | 2.372   |
| 5     | 9.342     | 13044587 | 589025 | 95.822  |
| 6     | 10.092    | 37782    | 3170   | 0.278   |
| 7     | 10.483    | 64192    | 3239   | 0.472   |
| Total |           | 13613406 | 632811 | 100.000 |

**Fig S3.** HPLC-UV chromatogram at 220 nm of **L2**.

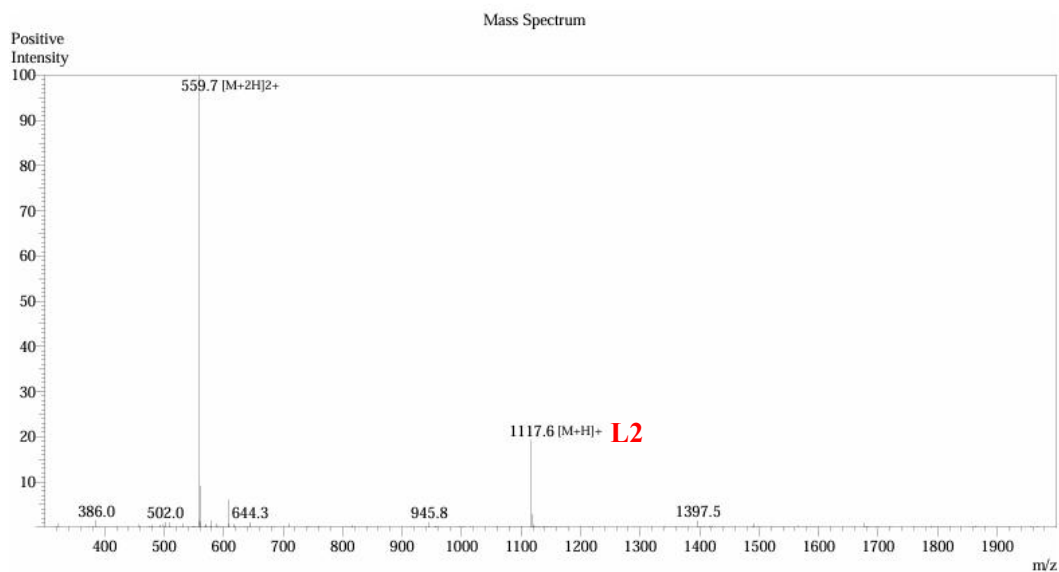

**Fig S4.** ESI-MS spectrum of **L2**. LRMS (ES+) m/z: [M+H]<sup>+</sup> calcd for C<sub>42</sub>H<sub>68</sub>N<sub>16</sub>O<sub>16</sub>S<sub>2</sub> 1117.4, found 1117.6.

**H-Cys-Arg-Gly-Asp-{D-Pro}-Pro-Arg-Gly-Asp-Ala-OH (L3).** Analytical HPLC using Method C, RT = 8.842 min, the HPLC purity is 99%.

**<Chromatogram>**

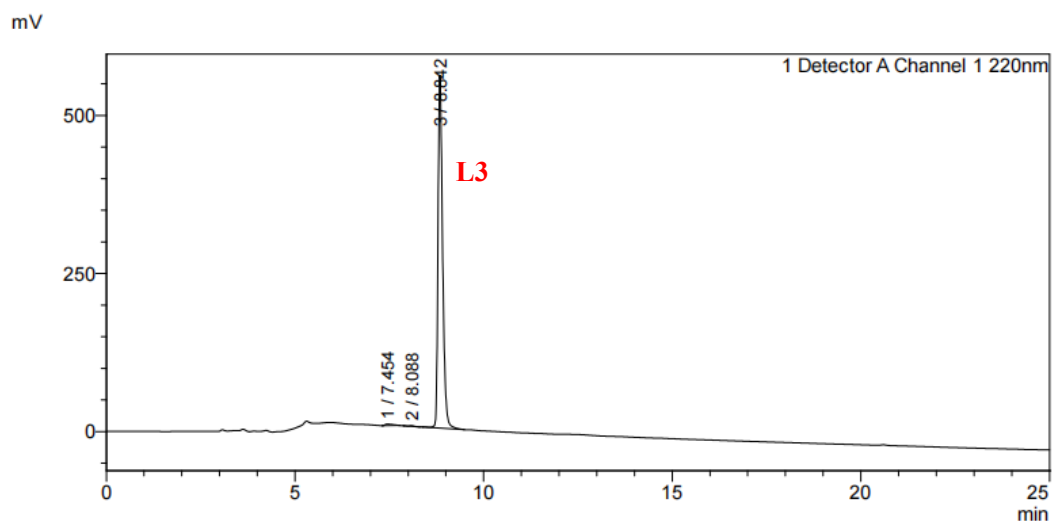

**<Peak Table>**

| Detector A Channel 1 220nm |           |         |        |         |
|----------------------------|-----------|---------|--------|---------|
| Peak#                      | Ret. Time | Area    | Height | Area%   |
| 1                          | 7.454     | 34378   | 2383   | 0.725   |
| 2                          | 8.088     | 7587    | 1230   | 0.160   |
| 3                          | 8.842     | 4698864 | 558401 | 99.115  |
| Total                      |           | 4740829 | 562014 | 100.000 |

**Fig S5.** HPLC-UV chromatogram at 220 nm of **L3**.

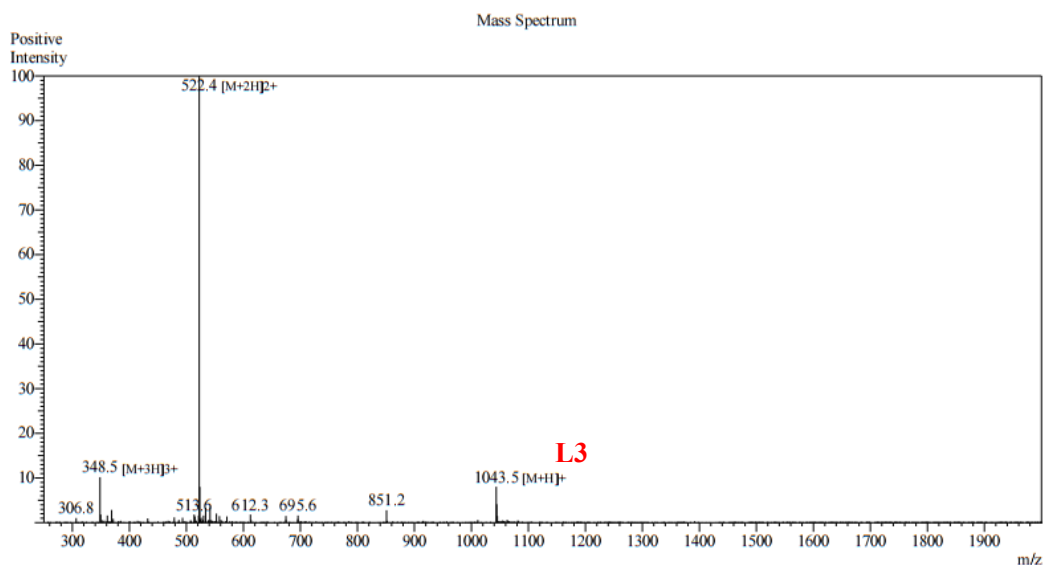

**Fig S6.** ESI-MS spectrum of **L3**. LRMS (ES+) m/z: [M+H]<sup>+</sup> calcd for C<sub>40</sub>H<sub>66</sub>N<sub>16</sub>O<sub>15</sub>S<sub>2</sub> 1043.5, found 1043.5.

**H-Cys-Ala-NH<sub>2</sub> (L4).** Analytical HPLC using Method D, RT = 4.017 min, the HPLC purity is 96%.

**<Chromatogram>**

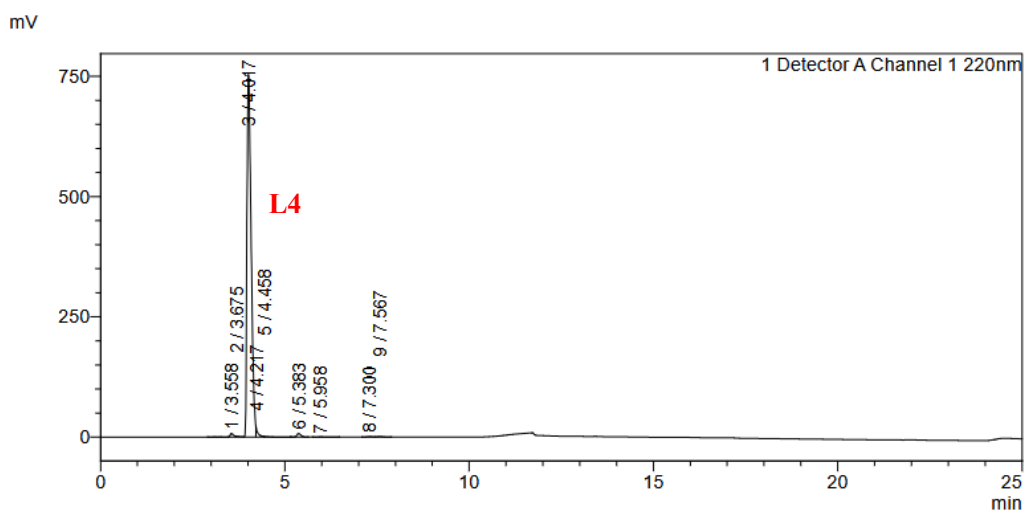

**<Peak Table>**

| Detector A Channel 1 220nm |           |         |        |         |
|----------------------------|-----------|---------|--------|---------|
| Peak#                      | Ret. Time | Area    | Height | Area%   |
| 1                          | 3.558     | 52967   | 7633   | 0.855   |
| 2                          | 3.675     | 14018   | 1651   | 0.226   |
| 3                          | 4.017     | 5960159 | 754411 | 96.179  |
| 4                          | 4.217     | 80475   | 23910  | 1.299   |
| 5                          | 4.458     | 9648    | 1031   | 0.156   |
| 6                          | 5.383     | 56638   | 7480   | 0.914   |
| 7                          | 5.958     | 3610    | 227    | 0.058   |
| 8                          | 7.300     | 8411    | 832    | 0.136   |
| 9                          | 7.567     | 11010   | 1125   | 0.178   |
| Total                      |           | 6196936 | 798300 | 100.000 |

**Fig S7.** HPLC-UV chromatogram at 220 nm of **L4**.

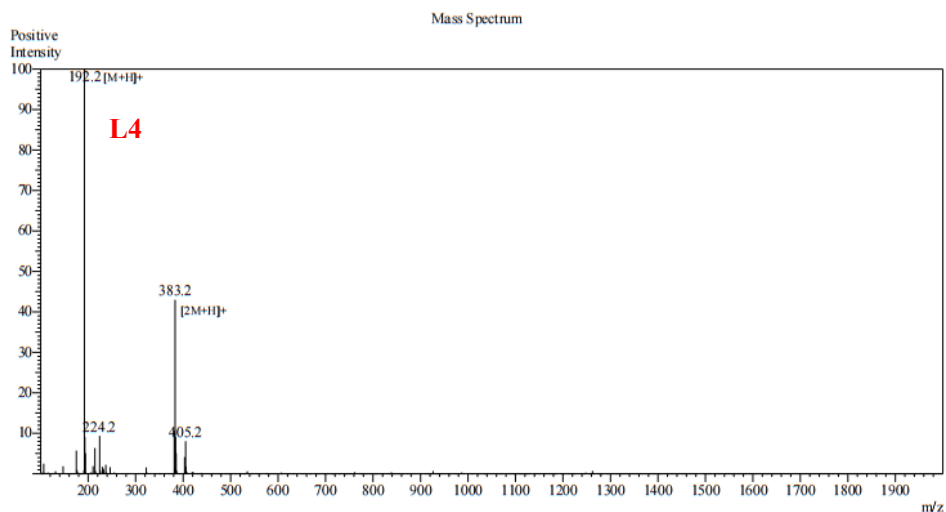

**Fig S8.** ESI-MS spectrum of **L4**. LRMS (ES+) m/z: [M+H]<sup>+</sup> calcd for C<sub>6</sub>H<sub>14</sub>N<sub>3</sub>O<sub>2</sub>S 192.1, found 192.2.

**H-Ala-Arg-Gly-Asp-pro-Pro-Arg-Gly-Asp-Cys-OH (L5).** Analytical HPLC using Method C, RT = 7.561 min, the HPLC purity is 99%.

**<Chromatogram>**

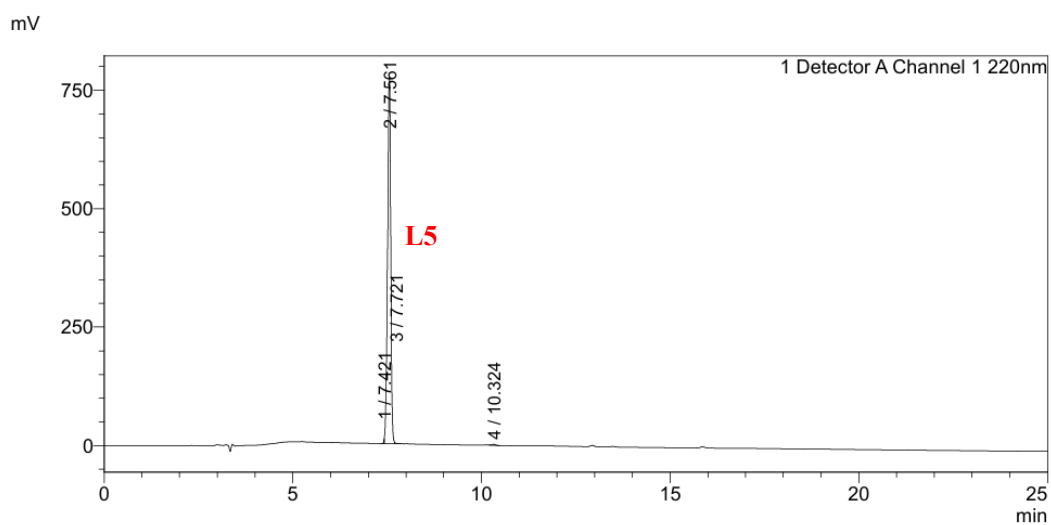

**<Peak Table>**

Detector A Channel 1 220nm

| Peak# | Ret. Time | Area    | Height | Area%   |
|-------|-----------|---------|--------|---------|
| 1     | 7.421     | 9663    | 5000   | 0.210   |
| 2     | 7.561     | 4586561 | 774340 | 99.437  |
| 3     | 7.721     | 3634    | 1645   | 0.079   |
| 4     | 10.324    | 12655   | 2266   | 0.274   |
| Total |           | 4612513 | 783252 | 100.000 |

**Fig S9.** HPLC-UV chromatogram at 220 nm of **L5**.

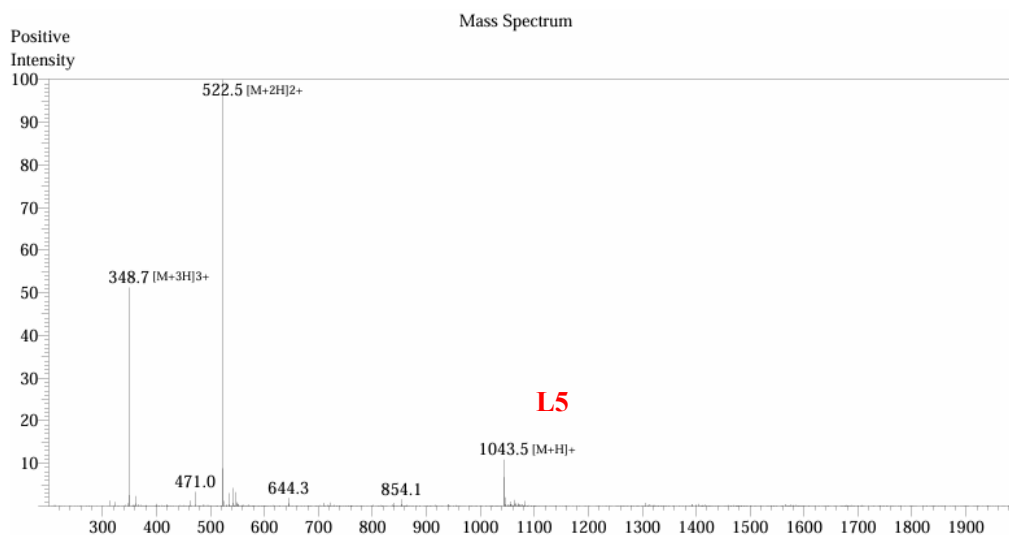

**Fig S10.** ESI-MS spectrum of **L5**. LRMS (ES+) m/z: [M+H]<sup>+</sup> calcd for C<sub>40</sub>H<sub>66</sub>N<sub>16</sub>O<sub>15</sub>S<sub>2</sub> 1043.5, found 1043.5.

**H-Cys-Arg-Gly-Asp-Ala-Ala-Arg-Gly-Asp-Cys-OH (L6).** Analytical HPLC using Method C, RT = 6.417 min, the HPLC purity is 90%.

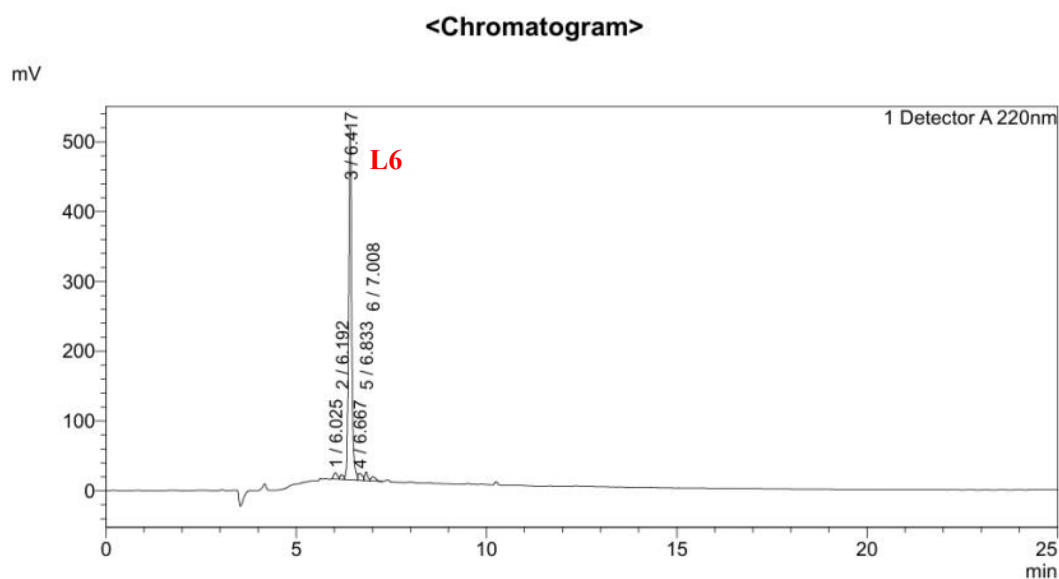

**<Peak Table>**

| Peak# | Ret. Time | Area    | Height | Area%   |
|-------|-----------|---------|--------|---------|
| 1     | 6.025     | 60625   | 8966   | 1.959   |
| 2     | 6.192     | 42654   | 6755   | 1.378   |
| 3     | 6.417     | 2791723 | 504527 | 90.211  |
| 4     | 6.667     | 81204   | 9856   | 2.624   |
| 5     | 6.833     | 68142   | 12281  | 2.202   |
| 6     | 7.008     | 50322   | 5926   | 1.626   |
| Total |           | 3094671 | 548312 | 100.000 |

**Fig S11.** HPLC-UV chromatogram at 220 nm of **L6**.

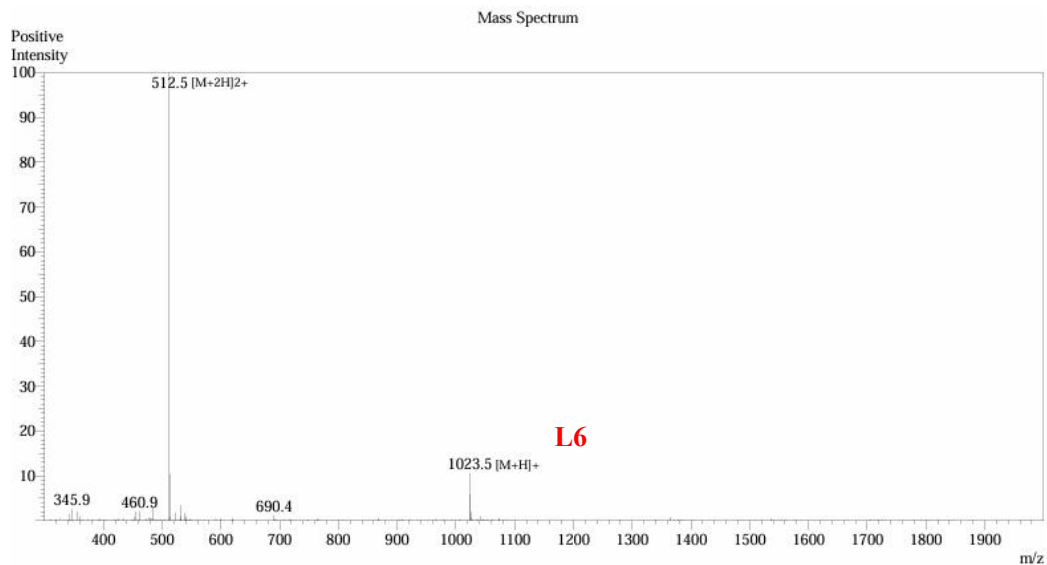

**Fig S12.** ESI-MS spectrum of **L6**. LRMS (ES+) m/z: [M+H]<sup>+</sup> calcd for C<sub>36</sub>H<sub>62</sub>N<sub>16</sub>O<sub>15</sub>S<sub>2</sub> 1023.4, found 1023.5.

**H-Cys-Arg-Gly-Asp-Gly-Gly-Arg-Gly-Asp-Cys-OH (L7).** Analytical HPLC using Method D, RT = 14.003 min, the HPLC purity is 93%.

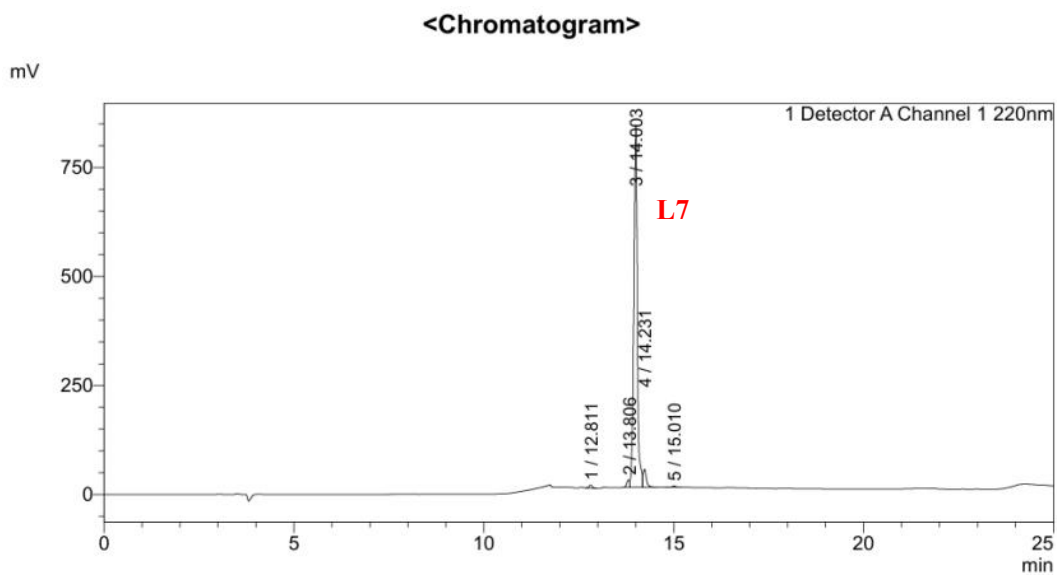

**<Peak Table>**

| Detector A Channel 1 220nm |           |         |        |         |
|----------------------------|-----------|---------|--------|---------|
| Peak#                      | Ret. Time | Area    | Height | Area%   |
| 1                          | 12.811    | 36849   | 6745   | 0.643   |
| 2                          | 13.806    | 86911   | 17192  | 1.517   |
| 3                          | 14.003    | 5341944 | 832144 | 93.267  |
| 4                          | 14.231    | 245666  | 41510  | 4.289   |
| 5                          | 15.010    | 16190   | 3185   | 0.283   |
| Total                      |           | 5727560 | 900775 | 100.000 |

**Fig S13.** HPLC-UV chromatogram at 220 nm of **L7**.

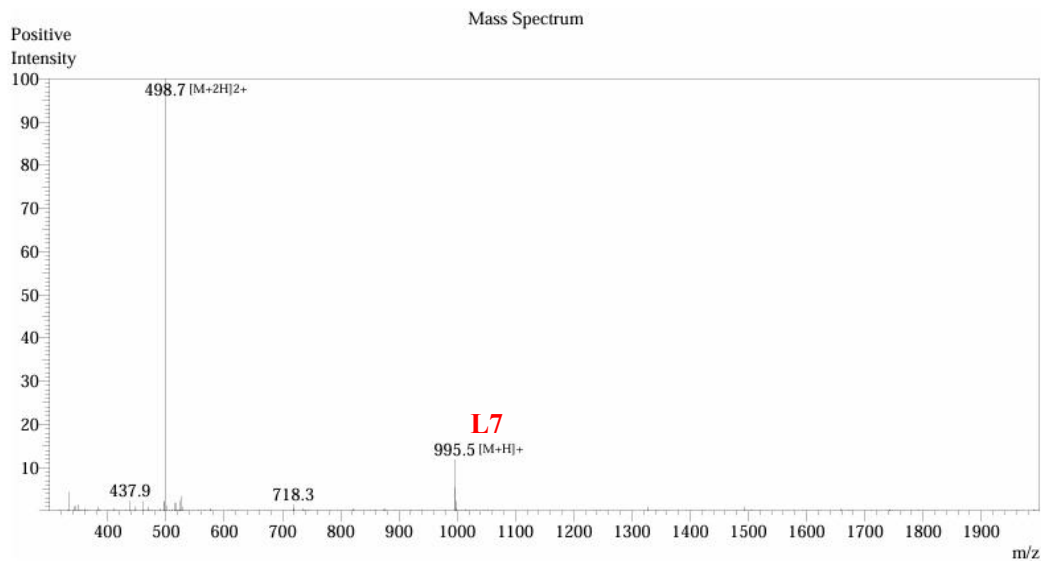

**Fig S14.** ESI-MS spectrum of **L7**. LRMS (ES<sup>+</sup>) m/z: [M+H]<sup>+</sup> calcd for C<sub>34</sub>H<sub>58</sub>N<sub>16</sub>O<sub>15</sub>S<sub>2</sub> 995.4, found 995.5.

**H-Cys-Arg-Gly-Asp-Asn-Gly-Arg-Gly-Asp-Cys-OH (L8).** Analytical HPLC using Method D, RT = 13.653 min, the HPLC purity is 99%.

**<Chromatogram>**

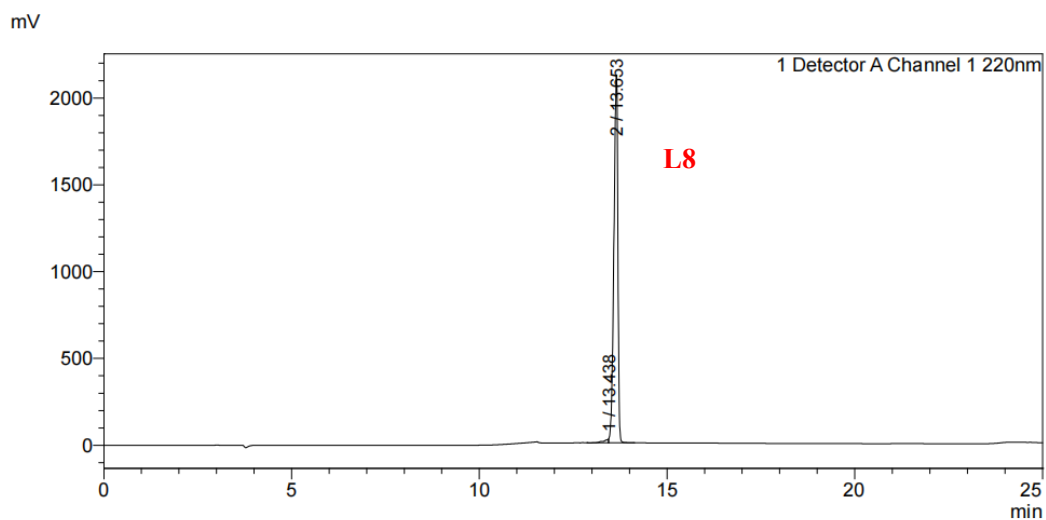

**<Peak Table>**

Detector A Channel 1 220nm

| Peak# | Ret. Time | Area     | Height  | Area%   |
|-------|-----------|----------|---------|---------|
| 1     | 13.438    | 178244   | 19055   | 1.130   |
| 2     | 13.653    | 15590577 | 2120088 | 98.870  |
| Total |           | 15768821 | 2139143 | 100.000 |

**Fig S15.** HPLC-UV chromatogram at 220 nm of **L8**.

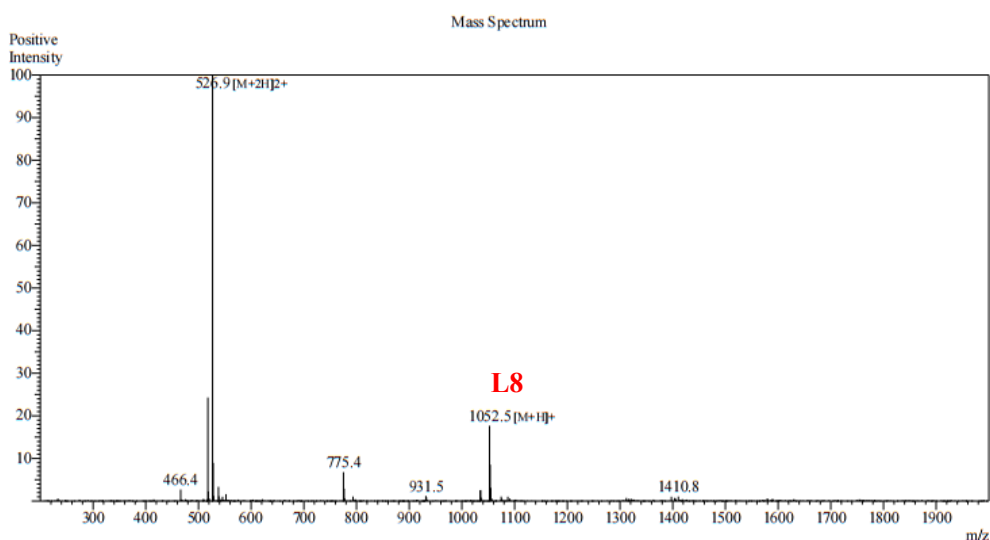

**Fig S16.** ESI-MS spectrum of **L8**. LRMS (ES+) m/z: [M+H]<sup>+</sup> calcd for C<sub>36</sub>H<sub>61</sub>N<sub>17</sub>O<sub>16</sub>S<sub>2</sub> 1052.4, found 1052.5.

**H-Cys-Arg-Gly-Asp-pro-Gly-Arg-Gly-Asp-Cys-OH (L9).** Analytical HPLC using Method C, RT = 7.898 min, the HPLC purity is 98%.

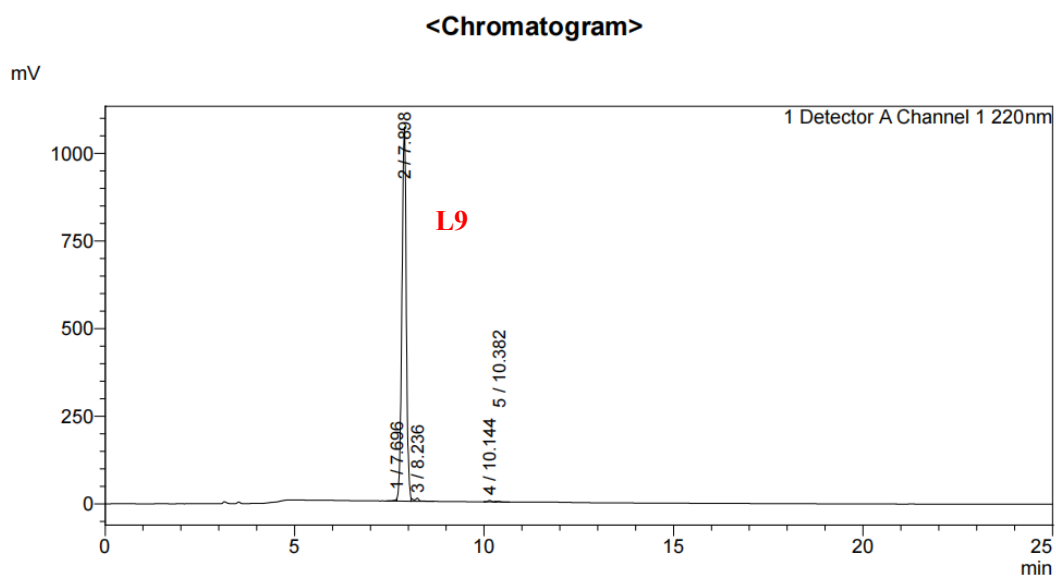

**<Peak Table>**

| Detector A Channel 1 220nm |           |         |         |         |
|----------------------------|-----------|---------|---------|---------|
| Peak#                      | Ret. Time | Area    | Height  | Area%   |
| 1                          | 7.696     | 27009   | 5603    | 0.309   |
| 2                          | 7.898     | 8592883 | 1066376 | 98.429  |
| 3                          | 8.236     | 80064   | 8718    | 0.917   |
| 4                          | 10.144    | 21102   | 3789    | 0.242   |
| 5                          | 10.382    | 8934    | 1724    | 0.102   |
| Total                      |           | 8729992 | 1086210 | 100.000 |

**Fig S17.** HPLC-UV chromatogram at 220 nm of **L9**.

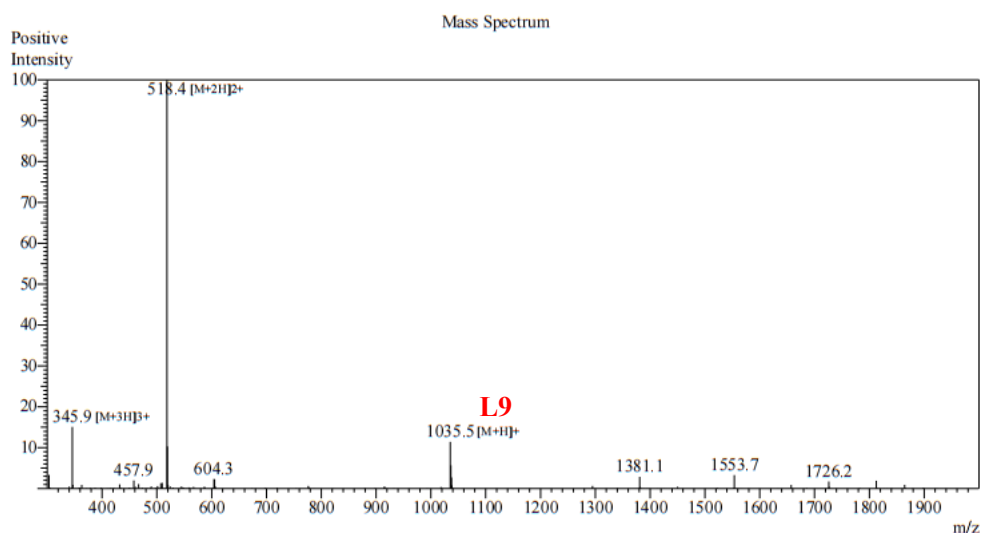

**Fig S18.** ESI-MS spectrum of L9. LRMS (ES+) m/z: [M+H]<sup>+</sup> calcd for C<sub>37</sub>H<sub>62</sub>N<sub>16</sub>O<sub>15</sub>S<sub>2</sub> 1035.4, found 1035.5.

**H-Cys-Arg-Gly-Asp-Aib-pro-Arg-Gly-Asp-Cys-OH (L10).** Analytical HPLC using Method D, RT = 12.200 min, the HPLC purity is 98%.

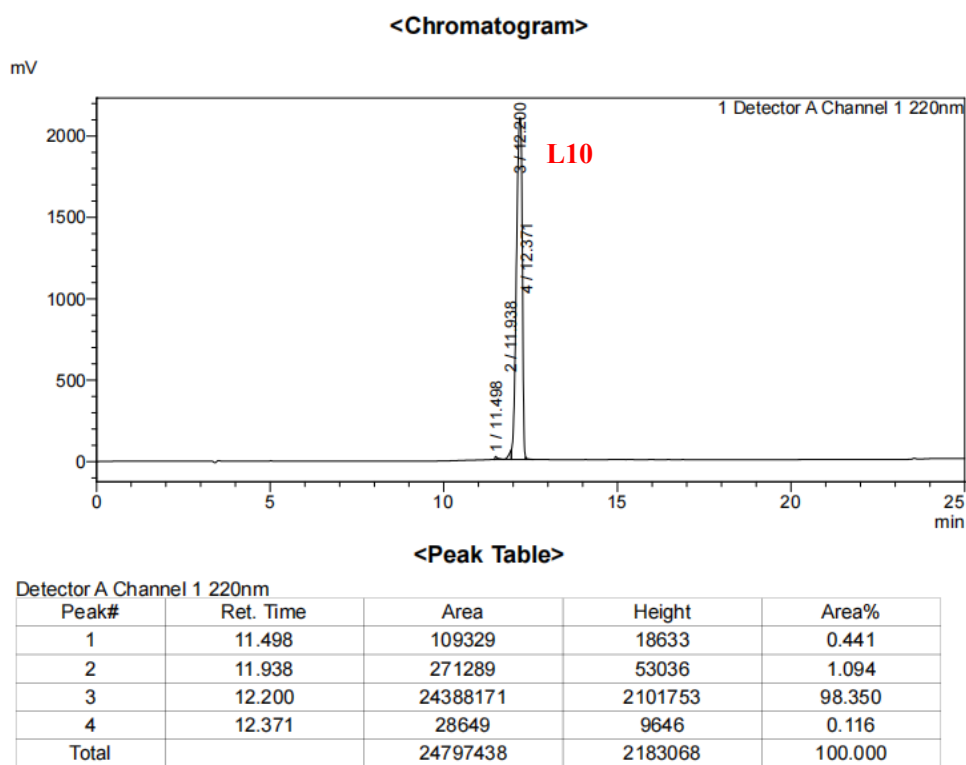

**Fig S19.** HPLC-UV chromatogram at 220 nm of L10.

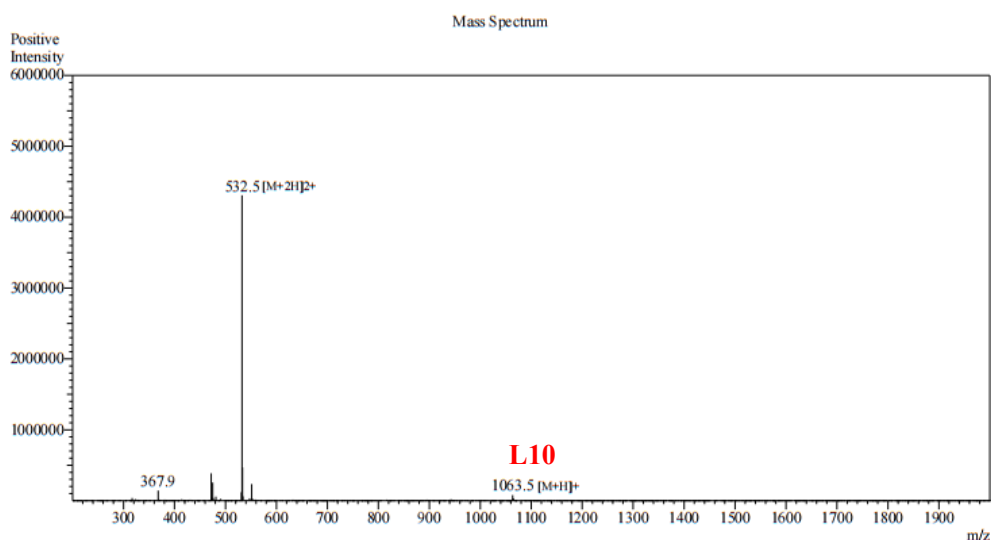

**Fig S20.** ESI-MS spectrum of **L10**. LRMS (ES+) m/z: [M+H]<sup>+</sup> calcd for C<sub>39</sub>H<sub>66</sub>N<sub>16</sub>O<sub>15</sub>S<sub>2</sub> 1063.4, found 1063.5.

**H-Cys-Arg-Gly-Asp-Aib-Gly-Arg-Gly-Asp-Cys-OH (L11).** Analytical HPLC using Method D, RT = 13.725 min, the HPLC purity is 96%.

<Chromatogram>

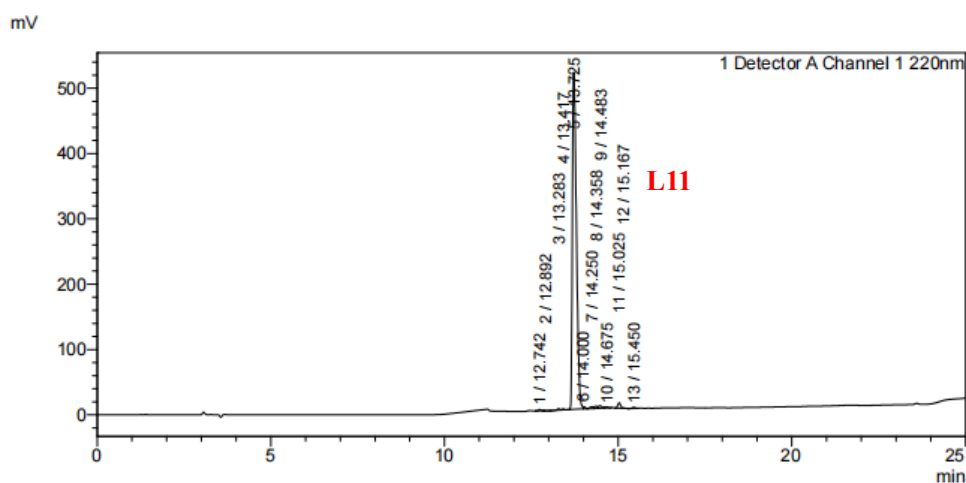

<Peak Table>

| Detector A Channel 1 220nm |           |         |        |         |
|----------------------------|-----------|---------|--------|---------|
| Peak#                      | Ret. Time | Area    | Height | Area%   |
| 1                          | 12.742    | 10436   | 2029   | 0.241   |
| 2                          | 12.892    | 354     | 88     | 0.008   |
| 3                          | 13.283    | 12242   | 2265   | 0.282   |
| 4                          | 13.417    | 6794    | 1543   | 0.157   |
| 5                          | 13.725    | 4156990 | 516176 | 95.830  |
| 6                          | 14.000    | 12203   | 3267   | 0.281   |
| 7                          | 14.250    | 21574   | 2999   | 0.497   |
| 8                          | 14.358    | 20736   | 3452   | 0.478   |
| 9                          | 14.483    | 27125   | 3808   | 0.625   |
| 10                         | 14.675    | 10529   | 1745   | 0.243   |
| 11                         | 15.025    | 48597   | 8189   | 1.120   |
| 12                         | 15.167    | 1668    | 532    | 0.038   |
| 13                         | 15.450    | 8646    | 1571   | 0.199   |
| Total                      |           | 4337894 | 547665 | 100.000 |

**Fig S21.** HPLC-UV chromatogram at 220 nm of **L11**.

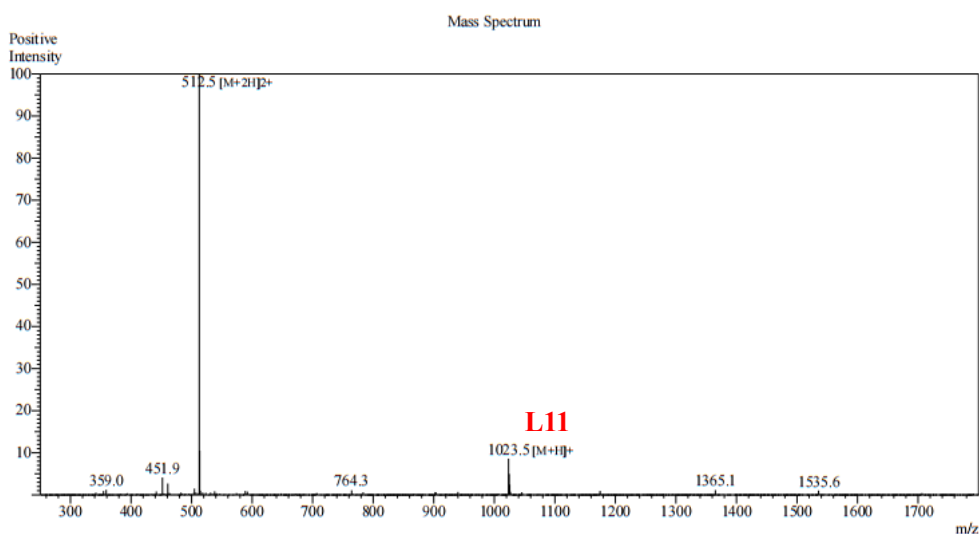

**Fig S22.** ESI-MS spectrum of **L11**. LRMS (ES+) m/z: [M+H]<sup>+</sup> calcd for C<sub>36</sub>H<sub>62</sub>N<sub>16</sub>O<sub>15</sub>S<sub>2</sub> 1023.4, found 1023.5.

**Ac-Cys-Arg-Gly-Asp-Ala-Ala-Arg-Gly-Asp-Cys-OH (L12)**. Analytical HPLC using Method C, RT = 7.092 min, the HPLC purity is 90%.

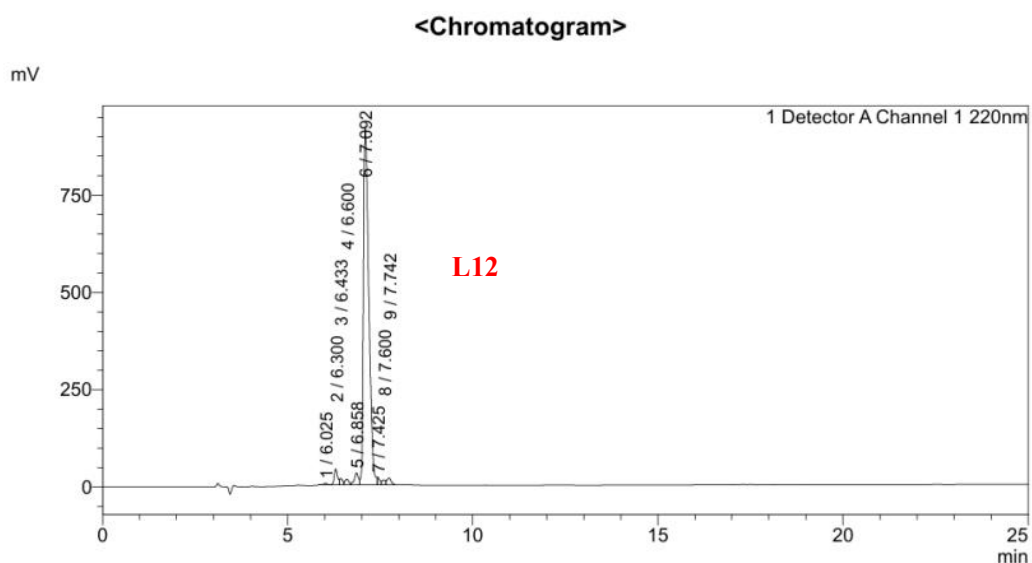

**<Peak Table>**

Detector A Channel 1 220nm

| Peak# | Ret. Time | Area     | Height  | Area%   |
|-------|-----------|----------|---------|---------|
| 1     | 6.025     | 26523    | 4216    | 0.259   |
| 2     | 6.300     | 259139   | 41237   | 2.528   |
| 3     | 6.433     | 97596    | 16147   | 0.952   |
| 4     | 6.600     | 112048   | 14468   | 1.093   |
| 5     | 6.858     | 229133   | 30736   | 2.235   |
| 6     | 7.092     | 9227475  | 921034  | 90.000  |
| 7     | 7.425     | 81836    | 19260   | 0.798   |
| 8     | 7.600     | 80731    | 11974   | 0.787   |
| 9     | 7.742     | 138235   | 16826   | 1.348   |
| Total |           | 10252716 | 1075897 | 100.000 |

**Fig S23.** HPLC-UV chromatogram at 220 nm of **L12**.

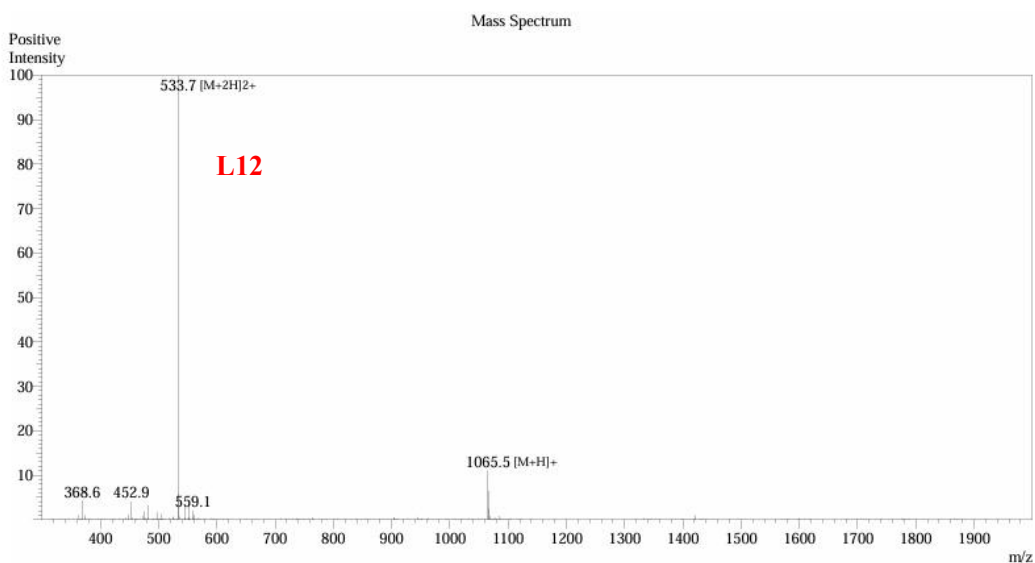

**Fig S24.** ESI-MS spectrum of **L12**. LRMS (ES<sup>+</sup>) m/z: [M+H]<sup>+</sup> calcd for C<sub>38</sub>H<sub>64</sub>N<sub>16</sub>O<sub>16</sub>S<sub>2</sub> 1065.4, found 1065.5.

**Ac-Cys-Arg-Gly-Asp-Gly-Gly-Arg-Gly-Asp-Cys-OH (L13).** Analytical HPLC using Method C, RT = 7.174 min, the HPLC purity is 91%.

<Chromatogram>

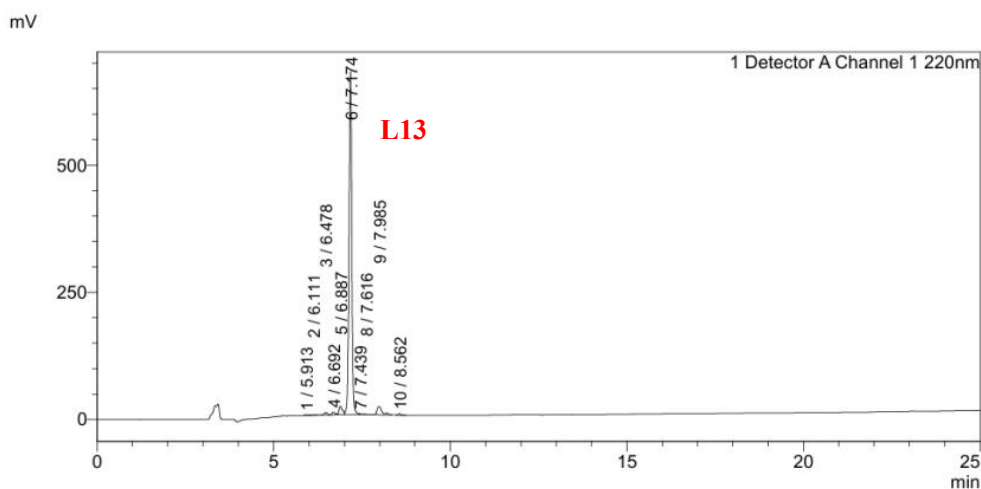

<Peak Table>

| Detector A Channel 1 220nm |           |         |        |         |
|----------------------------|-----------|---------|--------|---------|
| Peak#                      | Ret. Time | Area    | Height | Area%   |
| 1                          | 5.913     | 2680    | 621    | 0.066   |
| 2                          | 6.111     | 3855    | 507    | 0.094   |
| 3                          | 6.478     | 28062   | 4859   | 0.688   |
| 4                          | 6.692     | 35776   | 5565   | 0.877   |
| 5                          | 6.887     | 119965  | 17258  | 2.940   |
| 6                          | 7.174     | 3694598 | 674438 | 90.555  |
| 7                          | 7.439     | 9233    | 1945   | 0.226   |
| 8                          | 7.616     | 5682    | 1003   | 0.139   |
| 9                          | 7.985     | 165857  | 16535  | 4.065   |
| 10                         | 8.562     | 14235   | 2844   | 0.349   |
| Total                      |           | 4079943 | 725576 | 100.000 |

**Fig S25.** HPLC-UV chromatogram at 220 nm of **L13**.

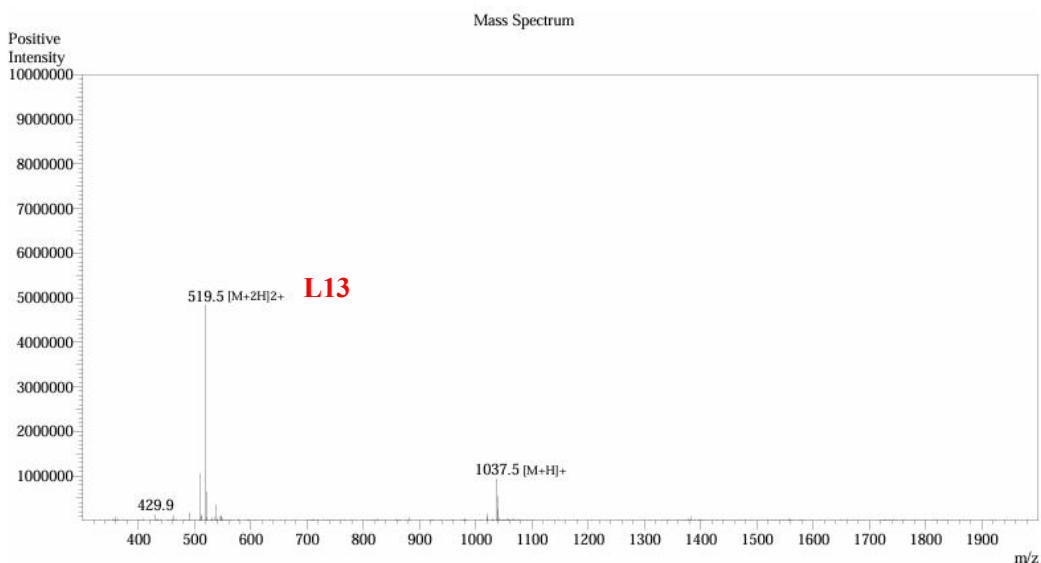

**Fig S26.** ESI-MS spectrum of **L13**. LRMS (ES<sup>+</sup>) m/z: [M+H]<sup>+</sup> calcd for C<sub>36</sub>H<sub>60</sub>N<sub>16</sub>O<sub>16</sub>S<sub>2</sub> 1037.5, found 1037.4.

**Ac-Cys-Arg-Gly-Asp-Asn-Gly-Arg-Gly-Asp-Cys-OH (L14).** Analytical HPLC using Method D, RT = 15.408 min, the HPLC purity is 92%.

**<Chromatogram>**

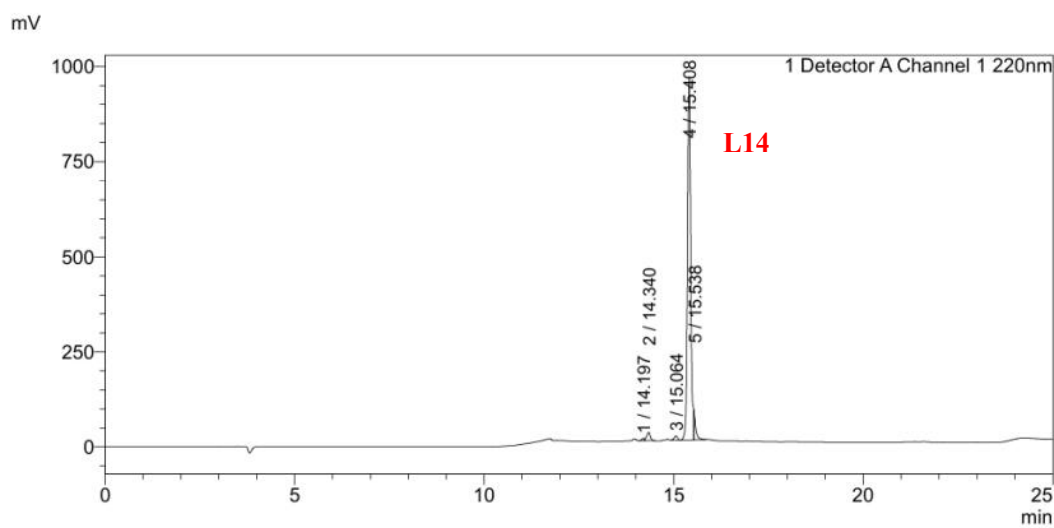

**<Peak Table>**

Detector A Channel 1 220nm

| Peak# | Ret. Time | Area    | Height  | Area%   |
|-------|-----------|---------|---------|---------|
| 1     | 14.197    | 28898   | 6202    | 0.477   |
| 2     | 14.340    | 146614  | 22236   | 2.419   |
| 3     | 15.064    | 67120   | 10970   | 1.108   |
| 4     | 15.408    | 5585487 | 956414  | 92.169  |
| 5     | 15.538    | 231928  | 78338   | 3.827   |
| Total |           | 6060047 | 1074161 | 100.000 |

**Fig S27.** HPLC-UV chromatogram at 220 nm of **L14**.

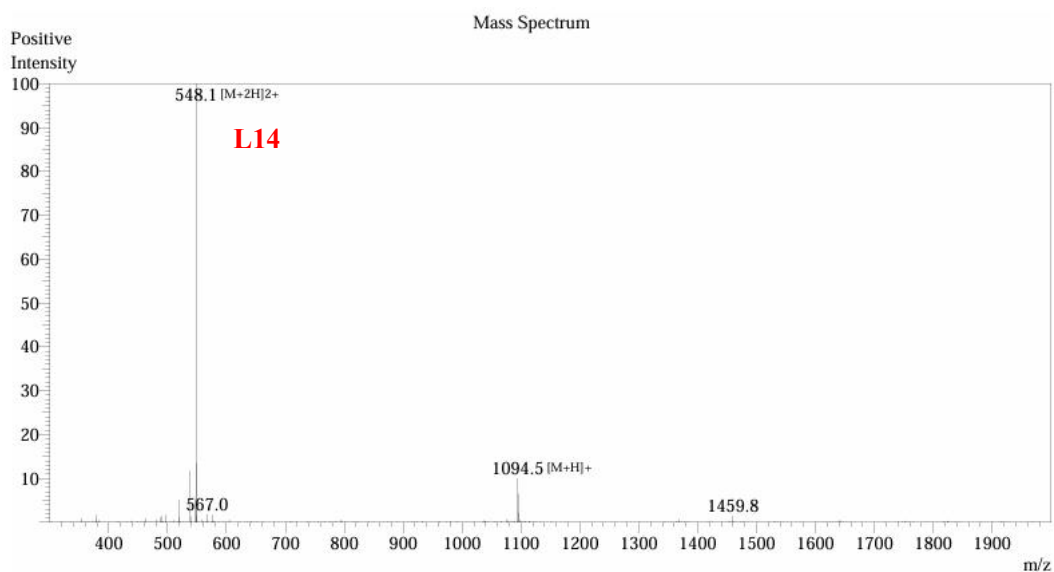

**Fig S28.** ESI-MS spectrum of **L14**. LRMS (ES<sup>+</sup>) m/z: [M+H]<sup>+</sup> calcd for C<sub>38</sub>H<sub>63</sub>N<sub>17</sub>O<sub>17</sub>S<sub>2</sub> 1094.4, found 1094.5.

**Ac-Cys-Arg-Gly-Asp-pro-Gly-Arg-Gly-Asp-Cys-OH (L15).** Analytical HPLC using Method C, RT = 5.842 min, the HPLC purity is 93%.

<Chromatogram>

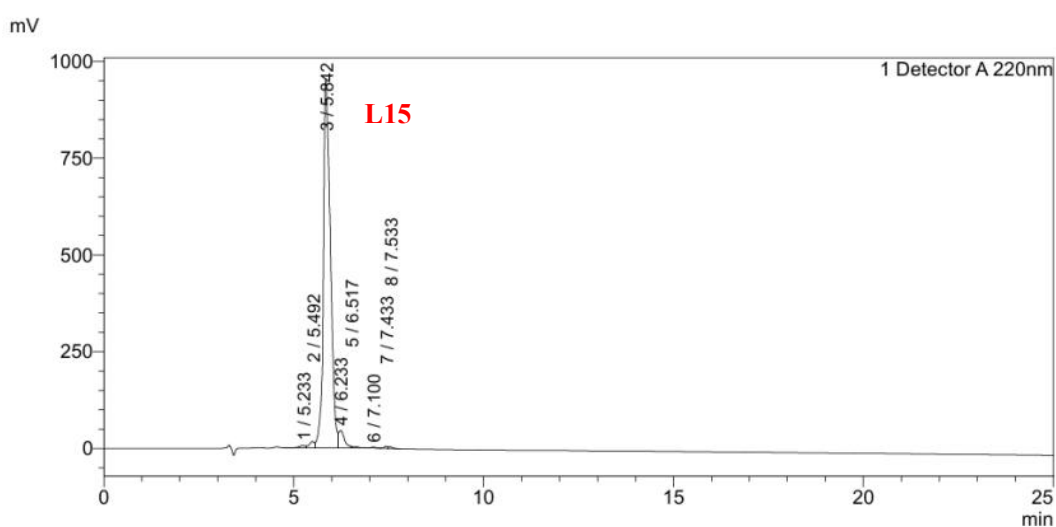

<Peak Table>

| Detector A 220nm |           |          |         |         |
|------------------|-----------|----------|---------|---------|
| Peak#            | Ret. Time | Area     | Height  | Area%   |
| 1                | 5.233     | 70554    | 6304    | 0.540   |
| 2                | 5.492     | 152449   | 16524   | 1.166   |
| 3                | 5.842     | 12219140 | 953668  | 93.463  |
| 4                | 6.233     | 493092   | 45052   | 3.772   |
| 5                | 6.517     | 42871    | 3820    | 0.328   |
| 6                | 7.100     | 25168    | 2567    | 0.193   |
| 7                | 7.433     | 38573    | 5337    | 0.295   |
| 8                | 7.533     | 31940    | 4657    | 0.244   |
| Total            |           | 13073786 | 1037929 | 100.000 |

**Fig S29.** HPLC-UV chromatogram at 220 nm of **L15**.

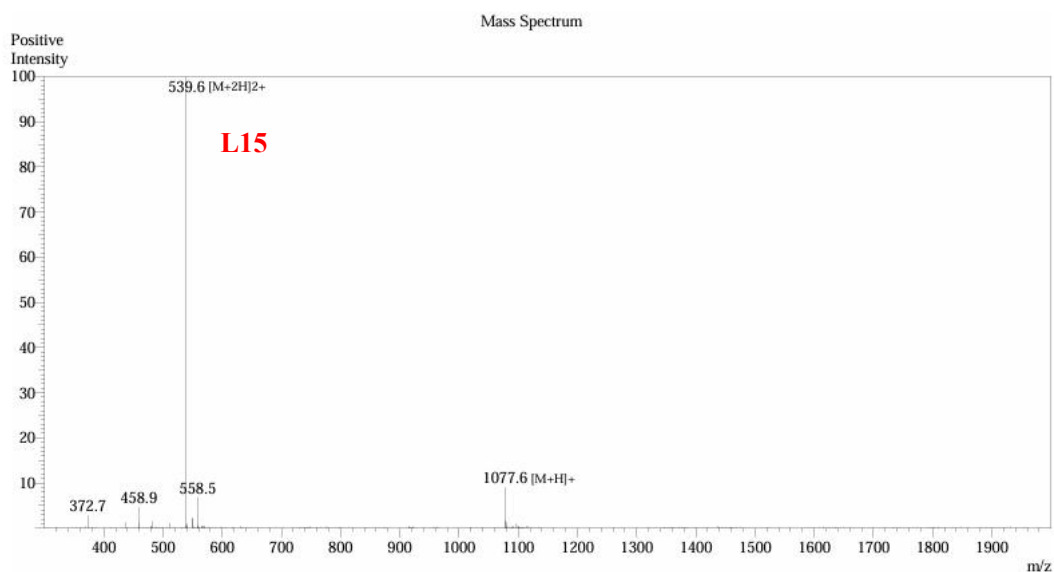

**Fig S30.** ESI-MS spectrum of **L15**. LRMS (ES+) m/z:  $[M+H]^+$  calcd for  $C_{39}H_{64}N_{16}O_{16}S_2$  1077.4, found 1077.6.

**Ac-Cys-Arg-Gly-Asp-Aib-pro-Arg-Gly-Asp-Cys-OH (L16).** Analytical HPLC using Method C, RT = 5.950 min, the HPLC purity is 92%.

**<Chromatogram>**

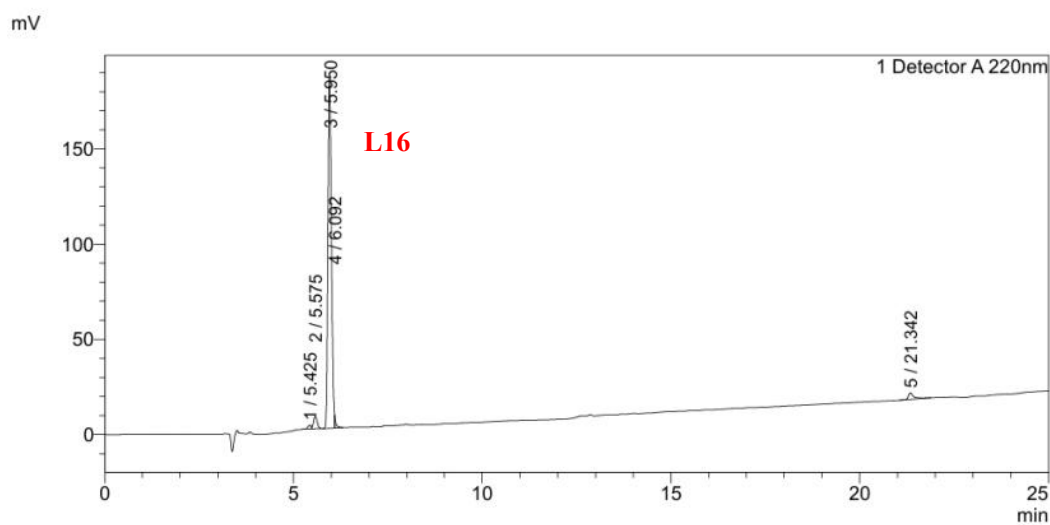

**<Peak Table>**

Detector A 220nm

| Peak# | Ret. Time | Area    | Height | Area%   |
|-------|-----------|---------|--------|---------|
| 1     | 5.425     | 11678   | 1918   | 0.907   |
| 2     | 5.575     | 44009   | 6582   | 3.419   |
| 3     | 5.950     | 1184472 | 184702 | 92.014  |
| 4     | 6.092     | 13613   | 6589   | 1.058   |
| 5     | 21.342    | 33497   | 3364   | 2.602   |
| Total |           | 1287269 | 203154 | 100.000 |

**Fig S31.** HPLC-UV chromatogram at 220 nm of **L16**.

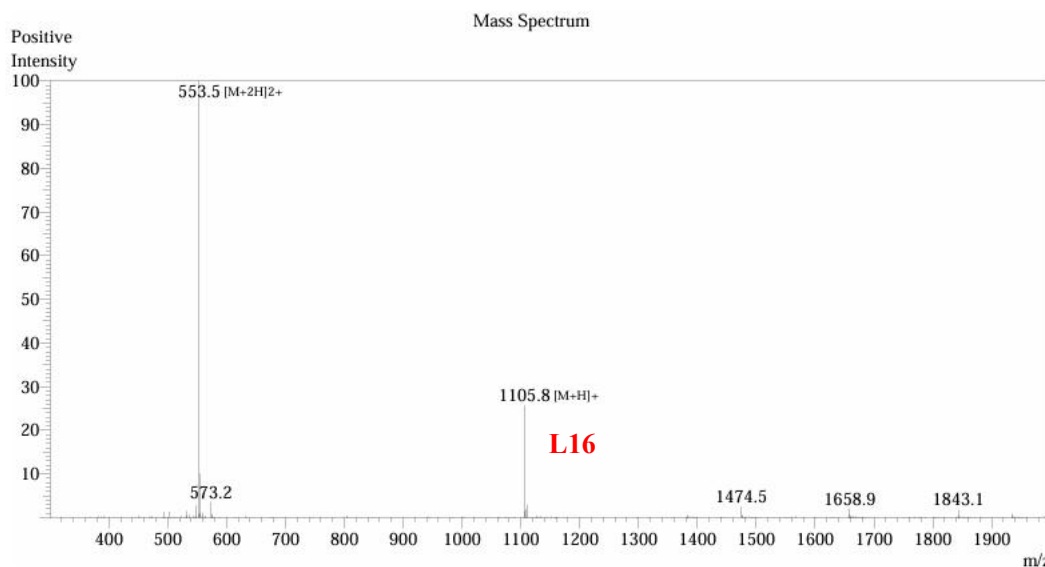

**Fig S32.** ESI-MS spectrum of **L16**. LRMS (ES+) m/z: [M+H]<sup>+</sup> calcd for C<sub>41</sub>H<sub>68</sub>N<sub>16</sub>O<sub>16</sub>S<sub>2</sub> 1105.4, found 1105.8.

**Ac-Cys-Arg-Gly-Asp-Aib-Gly-Arg-Gly-Asp-Cys-OH (L17).** Analytical HPLC using Method D, RT = 16.042 min, the HPLC purity is 94%.

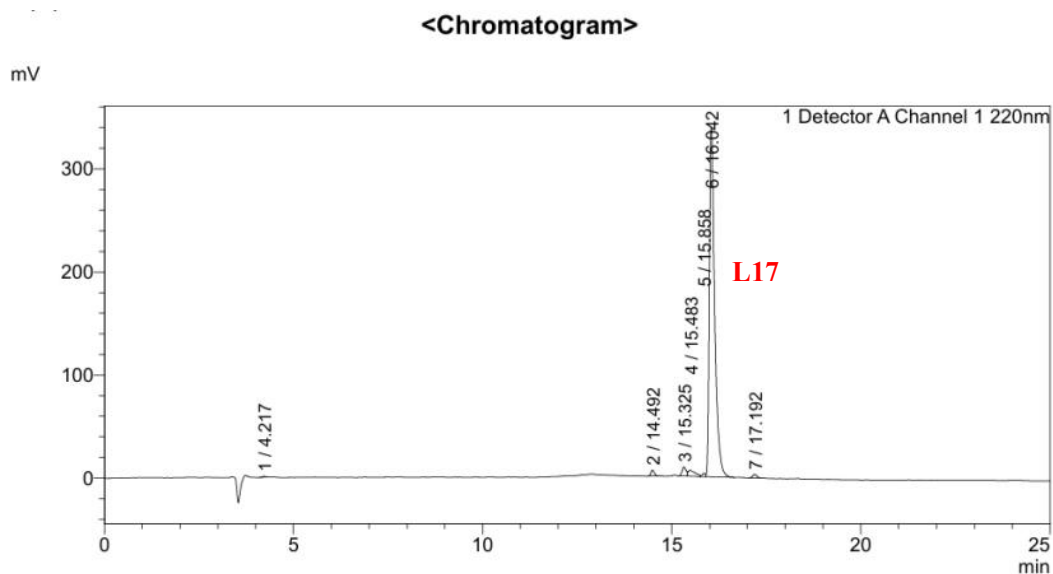

**<Peak Table>**

Detector A Channel 1 220nm

| Peak# | Ret. Time | Area    | Height | Area%   |
|-------|-----------|---------|--------|---------|
| 1     | 4.217     | 5422    | 1006   | 0.152   |
| 2     | 14.492    | 37209   | 5972   | 1.045   |
| 3     | 15.325    | 65552   | 8773   | 1.842   |
| 4     | 15.483    | 74563   | 5983   | 2.095   |
| 5     | 15.858    | 19541   | 3414   | 0.549   |
| 6     | 16.042    | 3328686 | 339345 | 93.525  |
| 7     | 17.192    | 28149   | 3555   | 0.791   |
| Total |           | 3559123 | 368048 | 100.000 |

**Fig S33.** HPLC-UV chromatogram at 220 nm of **L17**.

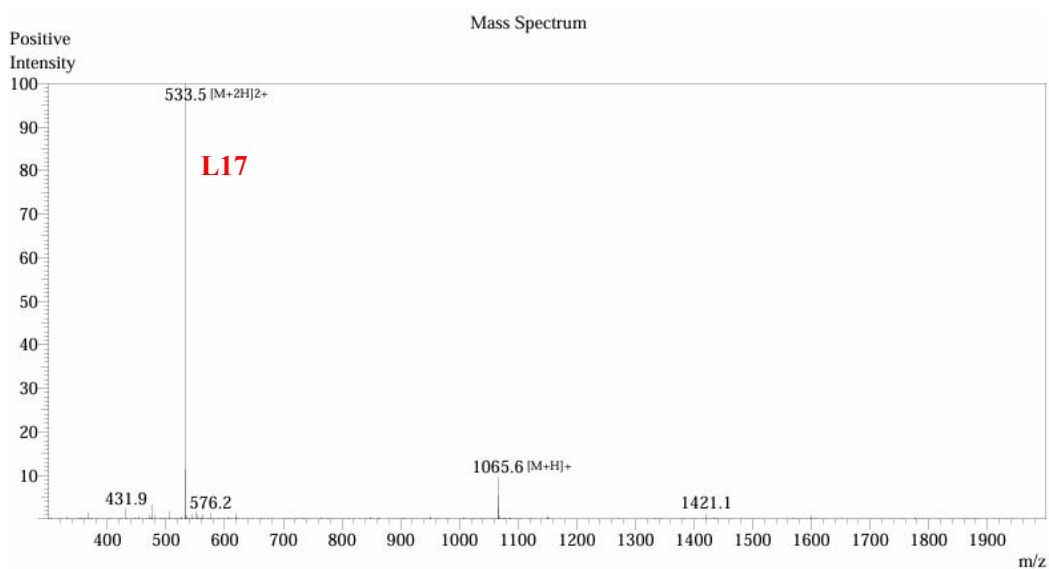

**Fig S34.** ESI-MS spectrum of **L17**. LRMS (ES<sup>+</sup>) m/z: [M+H]<sup>+</sup> calcd for C<sub>38</sub>H<sub>64</sub>N<sub>16</sub>O<sub>16</sub>S<sub>2</sub> 1065.4, found 1065.6.

**H-Cys-Arg-Gly-Asp-Ala-Ala-Arg-Gly-Asp-Cys-Gly-Ser-OH (L18).** Analytical HPLC using Method C, RT =4.342 min, the HPLC purity is 97%.

<Chromatogram>

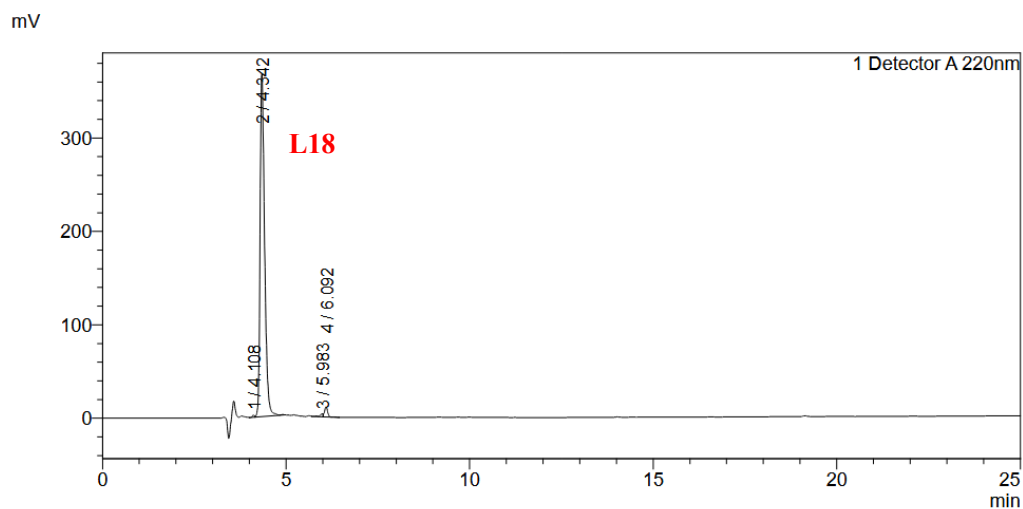

<Peak Table>

| Detector A 220nm |           |         |        |         |
|------------------|-----------|---------|--------|---------|
| Peak#            | Ret. Time | Area    | Height | Area%   |
| 1                | 4.108     | 8368    | 2222   | 0.261   |
| 2                | 4.342     | 3116176 | 367488 | 97.304  |
| 3                | 5.983     | 16171   | 3159   | 0.505   |
| 4                | 6.092     | 61788   | 10850  | 1.929   |
| Total            |           | 3202503 | 383719 | 100.000 |

**Fig S35.** HPLC-UV chromatogram at 220 nm of **L18**.

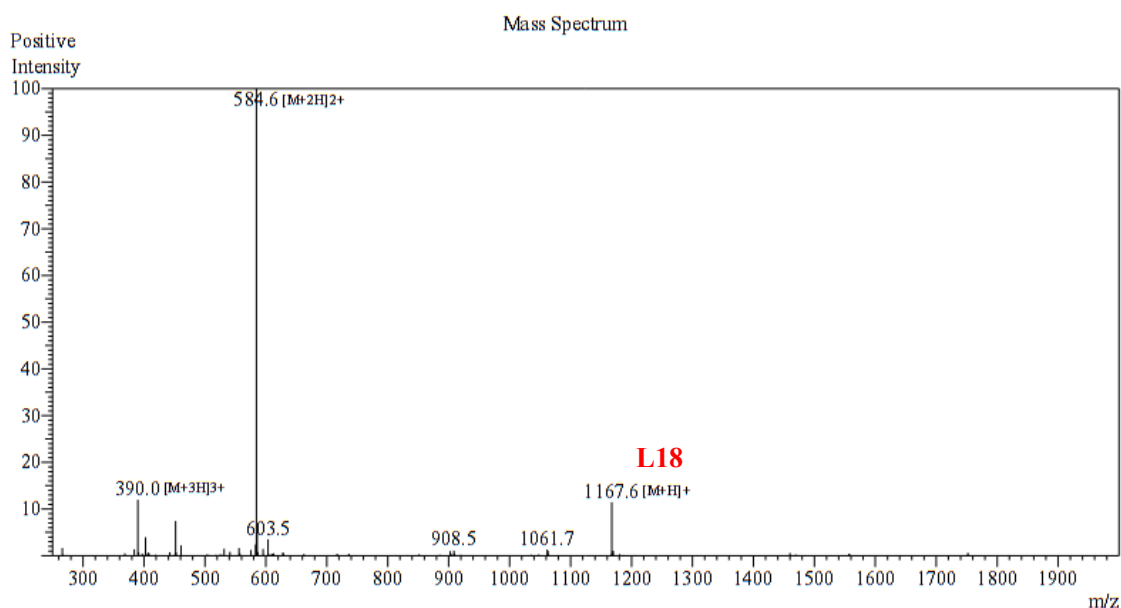

**Fig S36.** ESI-MS spectrum of **L18**. LRMS (ES+) m/z: [M+H]<sup>+</sup> calcd for C<sub>41</sub>H<sub>70</sub>N<sub>18</sub>O<sub>18</sub>S<sub>2</sub> 1167.5, found 1167.6.

**Gly-Ser-Cys-Arg-Gly-Asp-Ala-Ala-Arg-Gly-Asp-Cys-OH (L19).** Analytical HPLC using Method D, RT = 16.453 min, the HPLC purity is 95%.

**<Chromatogram>**

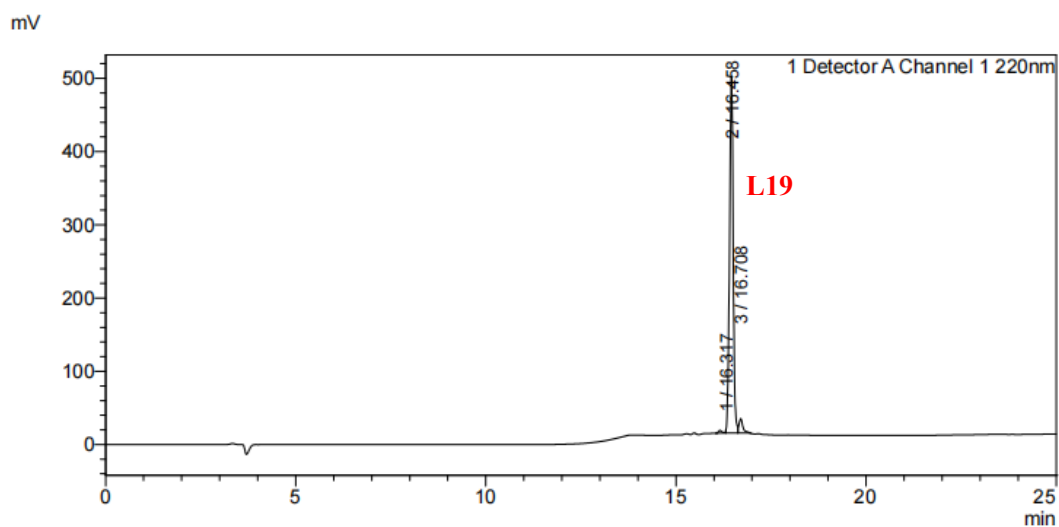

**<Peak Table>**

| Detector A Channel 1 220nm |           |         |        |         |
|----------------------------|-----------|---------|--------|---------|
| Peak#                      | Ret. Time | Area    | Height | Area%   |
| 1                          | 16.317    | 26160   | 4526   | 0.763   |
| 2                          | 16.458    | 3261215 | 487471 | 95.182  |
| 3                          | 16.708    | 138913  | 19627  | 4.054   |
| Total                      |           | 3426288 | 511624 | 100.000 |

**Fig S37.** HPLC-UV chromatogram at 220 nm of **L19**.

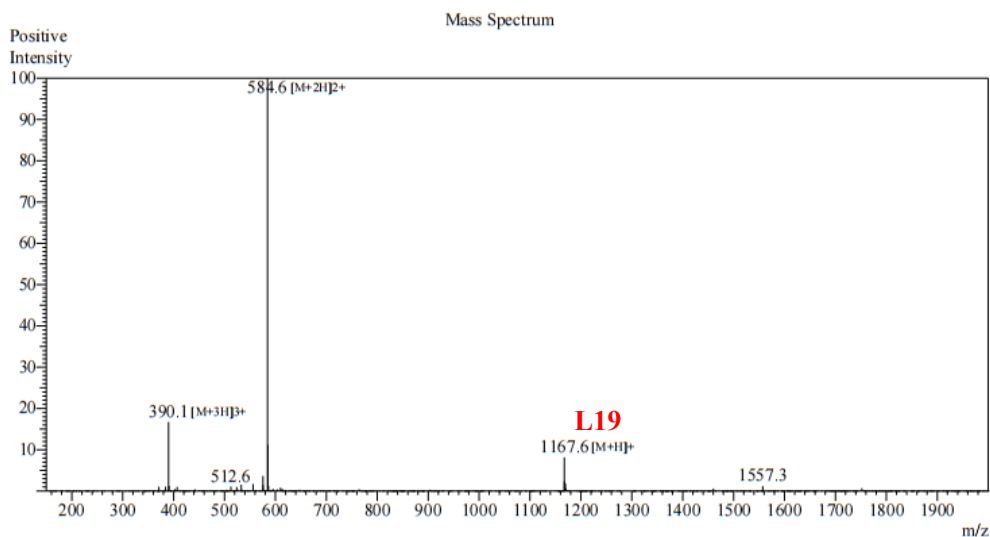

**Fig S38.** ESI-MS spectrum of **L19**. LRMS (ES+) m/z: [M+H]<sup>+</sup> calcd for C<sub>41</sub>H<sub>70</sub>N<sub>18</sub>O<sub>18</sub>S<sub>2</sub> 1167.5, found 1167.6.

**Gly-Ser-Cys-Arg-Gly-Asp-Ala-Ala-Arg-Gly-Asp-Cys-Gly-Ser-OH (L20).**

Analytical HPLC using Method C, RT = 5.712 min, the HPLC purity is 95%.

**<Chromatogram>**

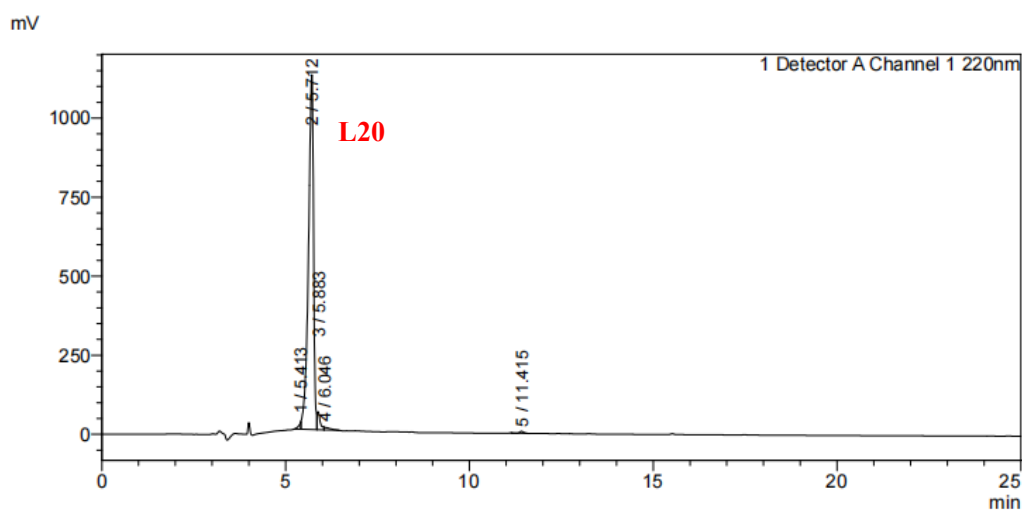

**<Peak Table>**

Detector A Channel 1 220nm

| Peak# | Ret. Time | Area     | Height  | Area%   |
|-------|-----------|----------|---------|---------|
| 1     | 5.413     | 97517    | 21785   | 0.861   |
| 2     | 5.712     | 10772948 | 1122590 | 95.154  |
| 3     | 5.883     | 324841   | 57287   | 2.869   |
| 4     | 6.046     | 89035    | 9018    | 0.786   |
| 5     | 11.415    | 37246    | 6040    | 0.329   |
| Total |           | 11321587 | 1216720 | 100.000 |

**Fig S39.** HPLC-UV chromatogram at 220 nm of **L20**.

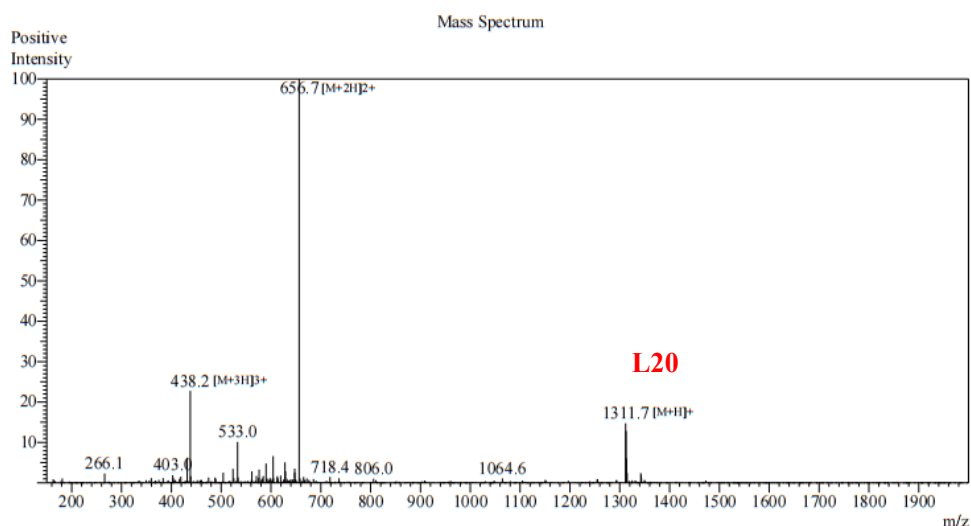

**Fig S40.** ESI-MS spectrum of **L20**. LRMS (ES+) m/z: [M+H]<sup>+</sup> calcd for C<sub>46</sub>H<sub>78</sub>N<sub>20</sub>O<sub>21</sub>S<sub>2</sub> 1311.5, found 1311.7.

**H-Cys-Asp-Gly-Arg-Ala-Ala-Asp-Gly-Arg-Cys-OH (L21).** Analytical HPLC using Method C, RT = 6.433 min, the HPLC purity is 96%.

**<Chromatogram>**

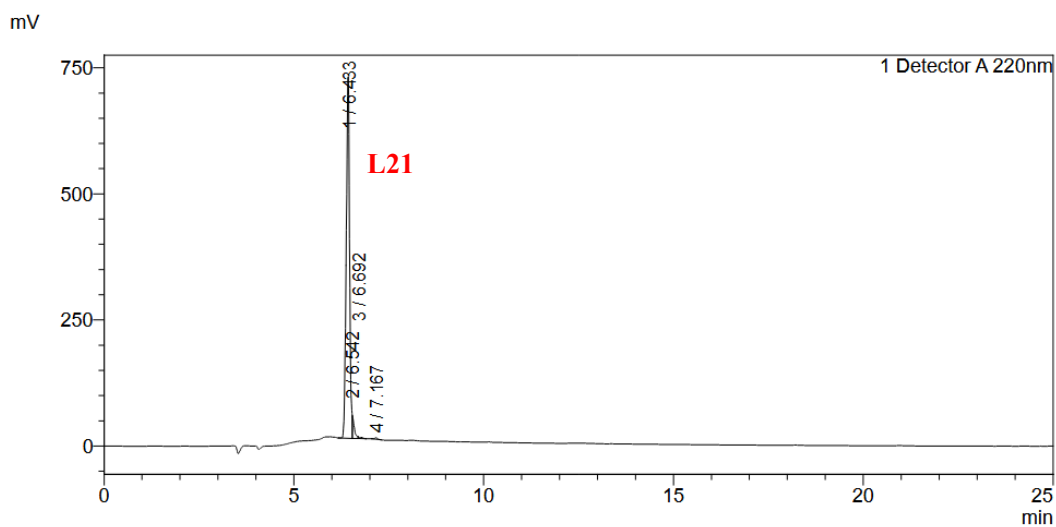

**<Peak Table>**

| Detector A 220nm |           |         |        |         |
|------------------|-----------|---------|--------|---------|
| Peak#            | Ret. Time | Area    | Height | Area%   |
| 1                | 6.433     | 4384577 | 717654 | 95.905  |
| 2                | 6.542     | 150577  | 44976  | 3.294   |
| 3                | 6.692     | 21440   | 3966   | 0.469   |
| 4                | 7.167     | 15210   | 2859   | 0.333   |
| Total            |           | 4571804 | 769456 | 100.000 |

**Fig S41.** HPLC-UV chromatogram at 220 nm of **L21**.

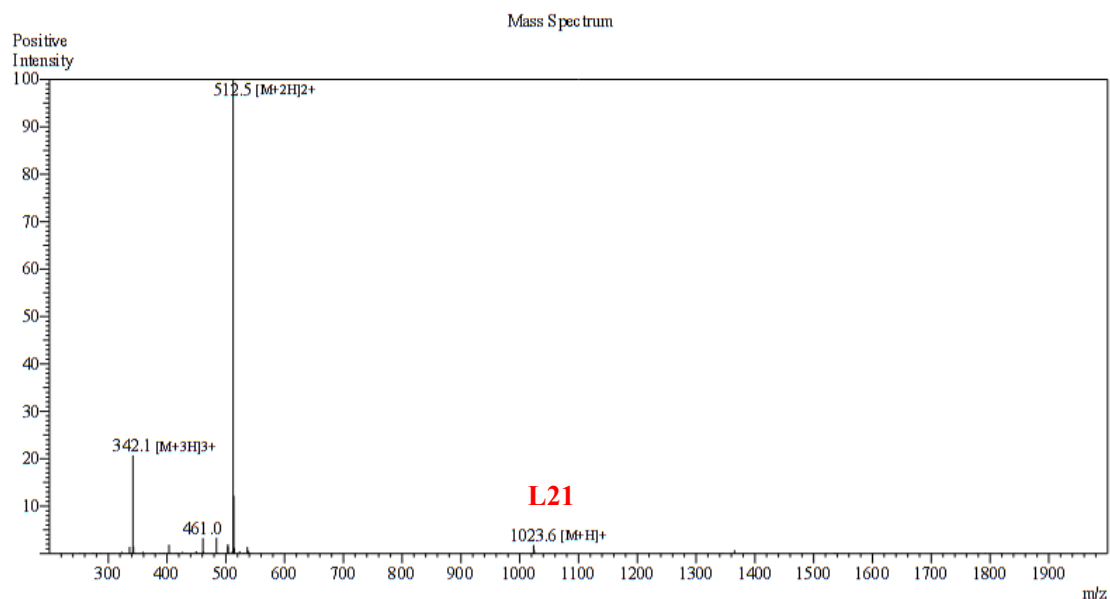

**Fig S42.** ESI-MS spectrum of **L21**. LRMS (ES+) m/z: [M+H]<sup>+</sup> calcd for C<sub>36</sub>H<sub>62</sub>N<sub>16</sub>O<sub>15</sub>S<sub>2</sub> 1023.5, found 1023.6.

**H-Cys-Arg-Gly-Asp-Ala-Ala-Asp-Gly-Arg-Cys-OH (L22).** Analytical HPLC using Method D, RT =10.857 min, the HPLC purity is 99%.

**<Chromatogram>**

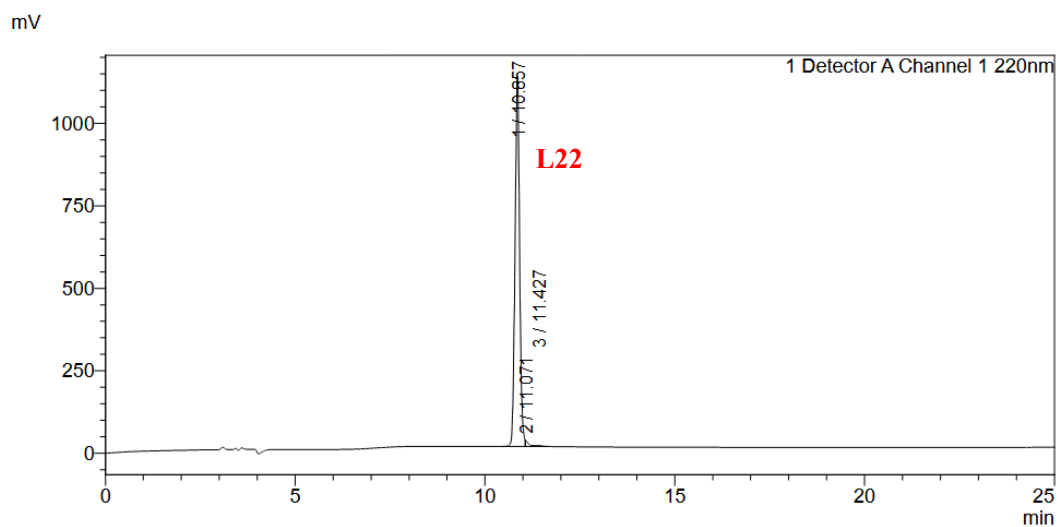

**<Peak Table>**

| Detector A Channel 1 220nm |           |         |         |         |
|----------------------------|-----------|---------|---------|---------|
| Peak#                      | Ret. Time | Area    | Height  | Area%   |
| 1                          | 10.857    | 9460151 | 1121816 | 98.573  |
| 2                          | 11.071    | 97815   | 18429   | 1.019   |
| 3                          | 11.427    | 39097   | 2775    | 0.407   |
| Total                      |           | 9597063 | 1143020 | 100.000 |

**Fig S43.** HPLC-UV chromatogram at 220 nm of **L22**.

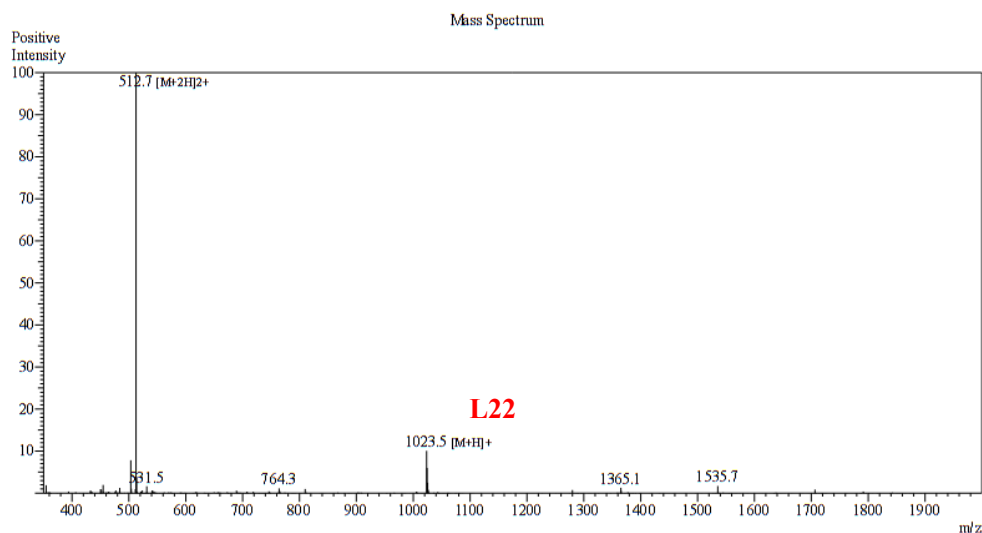

**Fig S44.** ESI-MS spectrum of **L22**. LRMS (ES+) m/z: [M+H]<sup>+</sup> calcd for C<sub>36</sub>H<sub>62</sub>N<sub>16</sub>O<sub>15</sub>S<sub>2</sub> 1023.5, found 1023.5.

**H-Cys-Asp-Gly-Arg-Ala-Ala-Arg-Gly-Asp-Cys-OH (L23).** Analytical HPLC using Method C, RT = 6.249 min, the HPLC purity is 99%.

<Chromatogram>

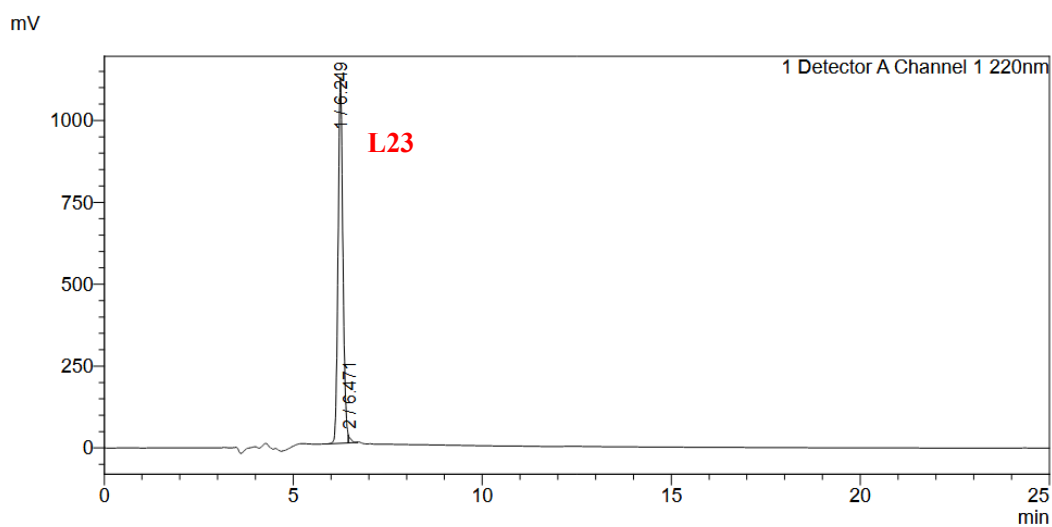

<Peak Table>

| Detector A Channel 1 220nm |           |          |         |         |
|----------------------------|-----------|----------|---------|---------|
| Peak#                      | Ret. Time | Area     | Height  | Area%   |
| 1                          | 6.249     | 9975290  | 1117378 | 99.139  |
| 2                          | 6.471     | 86635    | 20531   | 0.861   |
| Total                      |           | 10061926 | 1137909 | 100.000 |

**Fig S45.** HPLC-UV chromatogram at 220 nm of **L23**.

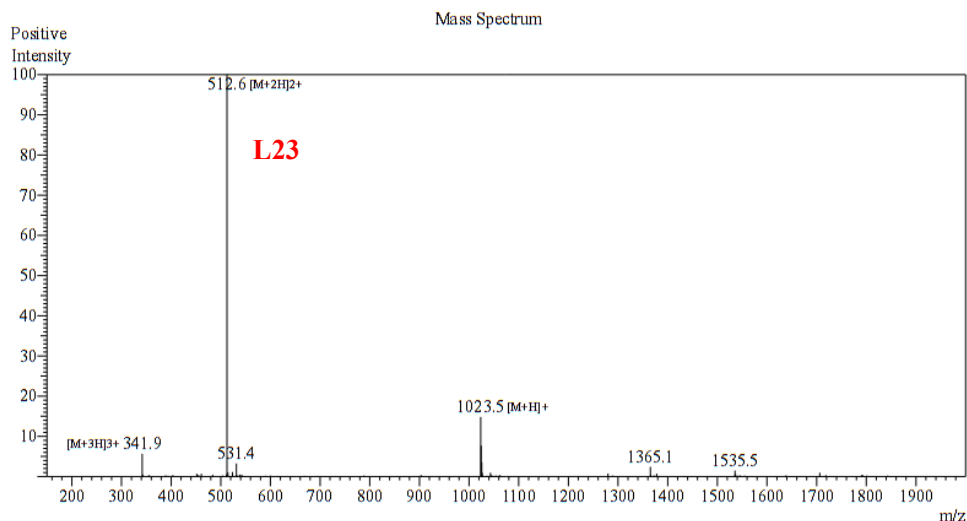

**Fig S46.** ESI-MS spectrum of **L23**. LRMS (ES+) m/z: [M+H]<sup>+</sup> calcd for C<sub>36</sub>H<sub>62</sub>N<sub>16</sub>O<sub>15</sub>S<sub>2</sub> 1023.5, found 1023.5.

**H-Cys-Arg-Asp-Ala-Ala-Arg-Asp-Cys-OH (L24).** Analytical HPLC using Method D, RT =16.375 min, the HPLC purity is 97%.

<Chromatogram>

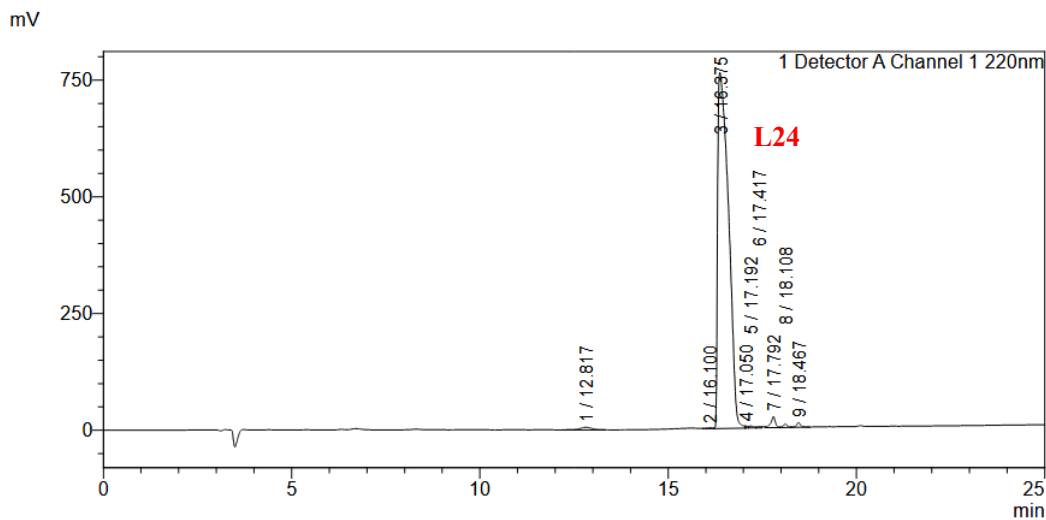

<Peak Table>

| Detector A Channel 1 220nm |           |          |        |         |
|----------------------------|-----------|----------|--------|---------|
| Peak#                      | Ret. Time | Area     | Height | Area%   |
| 1                          | 12.817    | 116677   | 5428   | 0.743   |
| 2                          | 16.100    | 21875    | 2060   | 0.139   |
| 3                          | 16.375    | 15163273 | 762393 | 96.580  |
| 4                          | 17.050    | 18440    | 4124   | 0.117   |
| 5                          | 17.192    | 38459    | 4291   | 0.245   |
| 6                          | 17.417    | 18553    | 2604   | 0.118   |
| 7                          | 17.792    | 196774   | 23642  | 1.253   |
| 8                          | 18.108    | 53918    | 7357   | 0.343   |
| 9                          | 18.467    | 72179    | 9956   | 0.460   |
| Total                      |           | 15700147 | 821856 | 100.000 |

**Fig S47.** HPLC-UV chromatogram at 220 nm of **L24**.

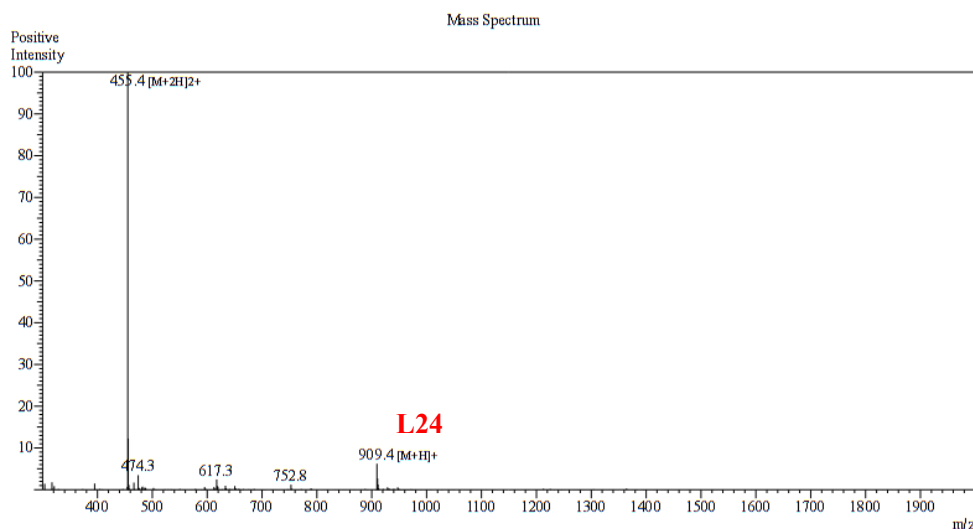

**Fig S48.** ESI-MS spectrum of **L24**. LRMS (ES+) m/z: [M+H]<sup>+</sup> calcd for C<sub>32</sub>H<sub>56</sub>N<sub>14</sub>O<sub>13</sub>S<sub>2</sub> 909.4, found 909.4.

**H-Cys-Arg-Gly-Asp-Cys-OH (L25).** Analytical HPLC using Method D, RT = 13.346 min, the HPLC purity is 98%.

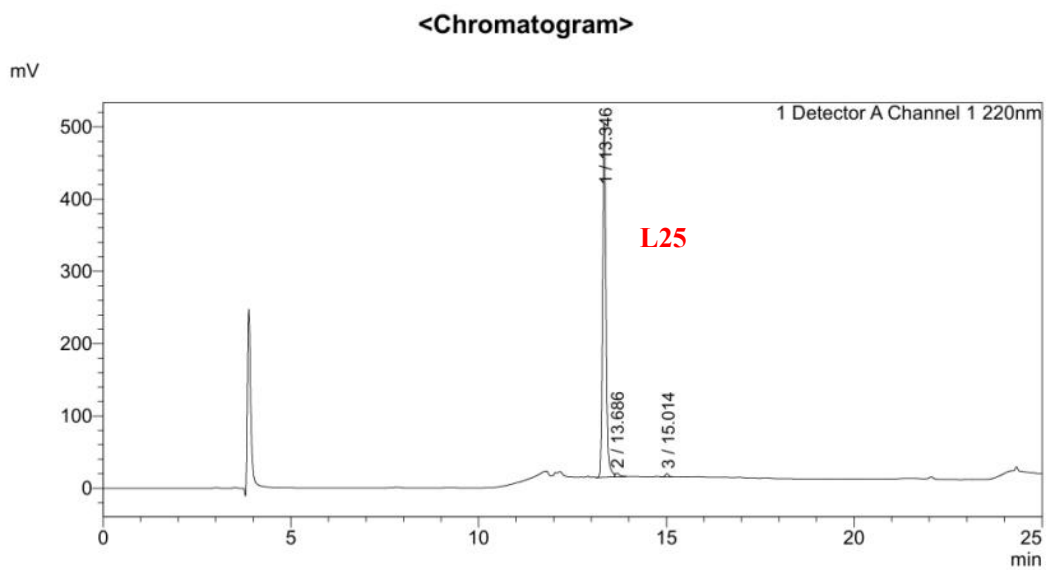

**<Peak Table>**

| Detector A Channel 1 220nm |           |         |        |         |
|----------------------------|-----------|---------|--------|---------|
| Peak#                      | Ret. Time | Area    | Height | Area%   |
| 1                          | 13.346    | 3064250 | 489841 | 97.987  |
| 2                          | 13.686    | 38647   | 5071   | 1.236   |
| 3                          | 15.014    | 24310   | 4314   | 0.777   |
| Total                      |           | 3127207 | 499226 | 100.000 |

**Fig S49.** HPLC-UV chromatogram at 220 nm of **L25**.

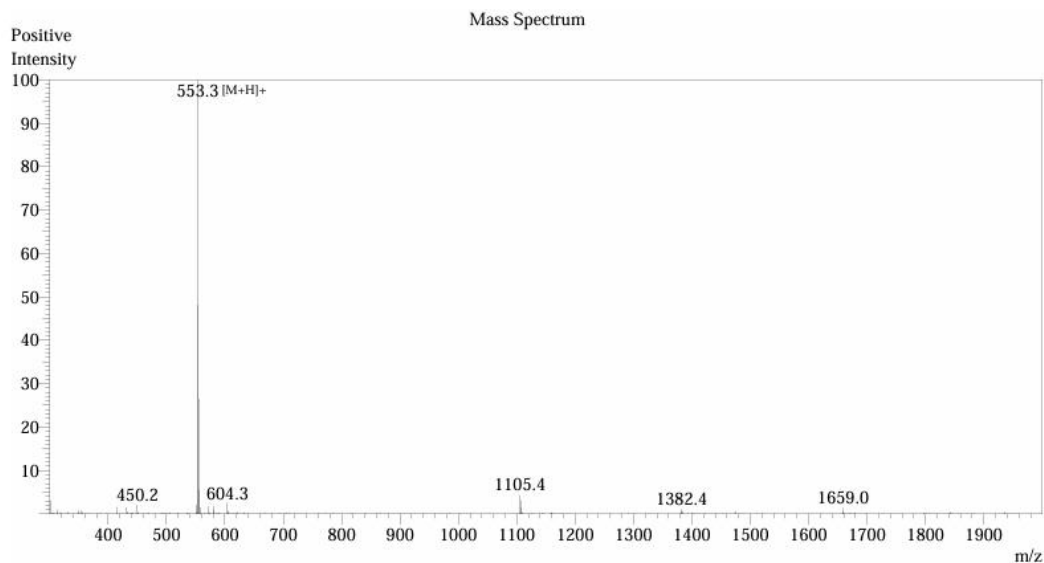

**Fig S50.** ESI-MS spectrum of **L25**. LRMS (ES<sup>+</sup>) m/z: [M+H]<sup>+</sup> calcd for C<sub>18</sub>H<sub>32</sub>N<sub>8</sub>O<sub>8</sub>S<sub>2</sub> 553.2, found 553.3.

**H-Cys-Ala-Ala-Cys-OH (L26).** Analytical HPLC using Method D, RT = 13.550 min, the HPLC purity is 95%.

<Chromatogram>

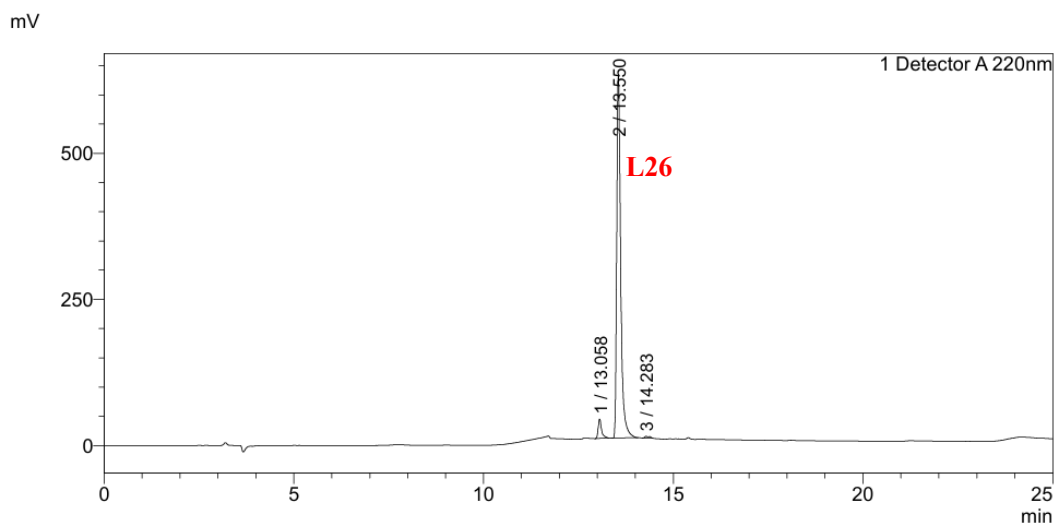

<Peak Table>

Detector A 220nm

| Peak# | Ret. Time | Area    | Height | Area%   |
|-------|-----------|---------|--------|---------|
| 1     | 13.058    | 208546  | 33521  | 4.386   |
| 2     | 13.550    | 4522129 | 621423 | 95.097  |
| 3     | 14.283    | 24591   | 2952   | 0.517   |
| Total |           | 4755266 | 657896 | 100.000 |

**Fig S51** . HPLC-UV chromatogram at 220 nm of **L26**.

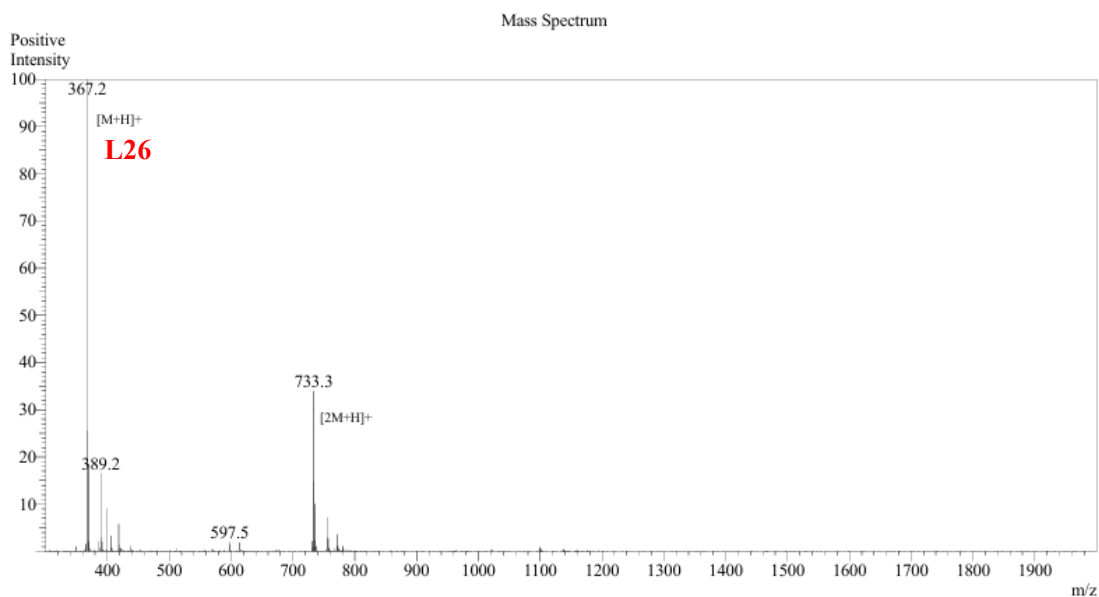

**Fig S52** . ESI-MS spectrum of **L26**. LRMS (ES<sup>+</sup>) m/z: [M+H]<sup>+</sup> calcd for C<sub>12</sub>H<sub>22</sub>N<sub>4</sub>O<sub>5</sub>S<sub>2</sub> 367.1, found 367.2.

**H-Cys-Ala-Ala-Ala-Cys-OH (L27)**. Analytical HPLC using Method C, RT = 5.587 min, the HPLC purity is 99%.

**<Chromatogram>**

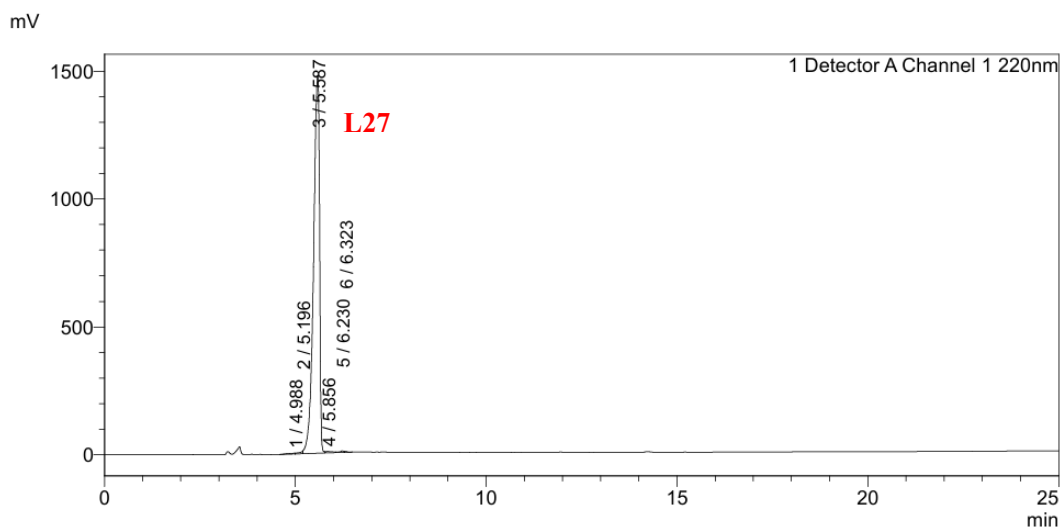

**<Peak Table>**

Detector A Channel 1 220nm

| Peak# | Ret. Time | Area     | Height  | Area%   |
|-------|-----------|----------|---------|---------|
| 1     | 4.988     | 41701    | 3033    | 0.254   |
| 2     | 5.196     | 64089    | 9757    | 0.390   |
| 3     | 5.587     | 16182021 | 1477475 | 98.505  |
| 4     | 5.856     | 69169    | 6272    | 0.421   |
| 5     | 6.230     | 50508    | 6874    | 0.307   |
| 6     | 6.323     | 20199    | 4270    | 0.123   |
| Total |           | 16427687 | 1507682 | 100.000 |

**Fig S53** . HPLC-UV chromatogram at 220 nm of **L27**.

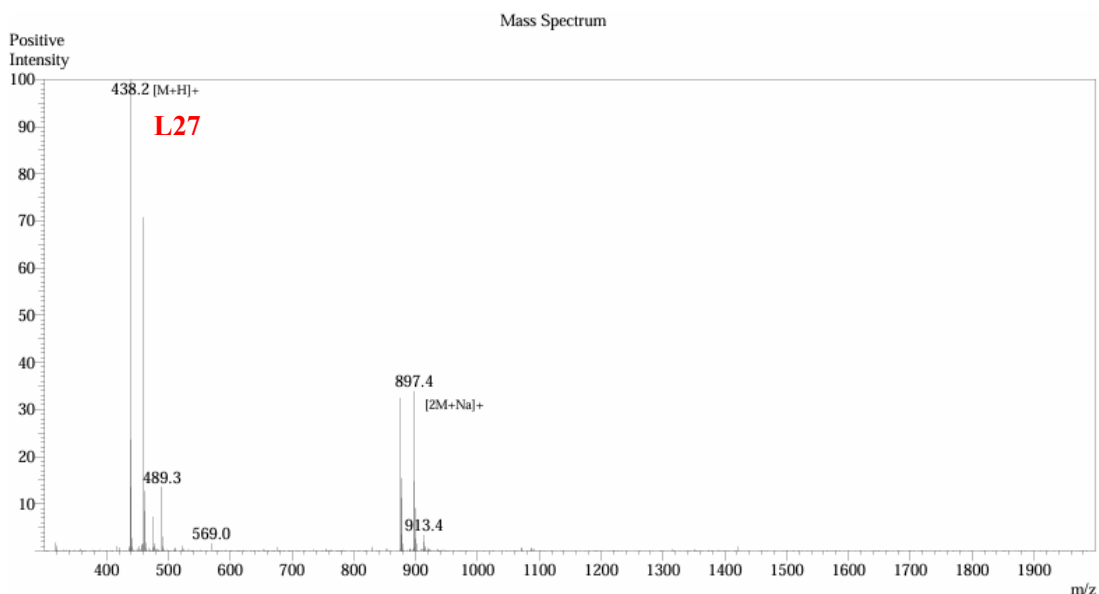

**Fig S54** . ESI-MS spectrum of **L27**. LRMS (ES<sup>+</sup>) m/z: [M+H]<sup>+</sup> calcd for C<sub>15</sub>H<sub>27</sub>N<sub>5</sub>O<sub>6</sub>S<sub>2</sub> 438.1, found 438.2.

**H-Cys-Ala-Ala-Ala-Ala-Cys-OH (L28)**. Analytical HPLC using Method C, RT = 7.846 min, the HPLC purity is 96%.

**<Chromatogram>**

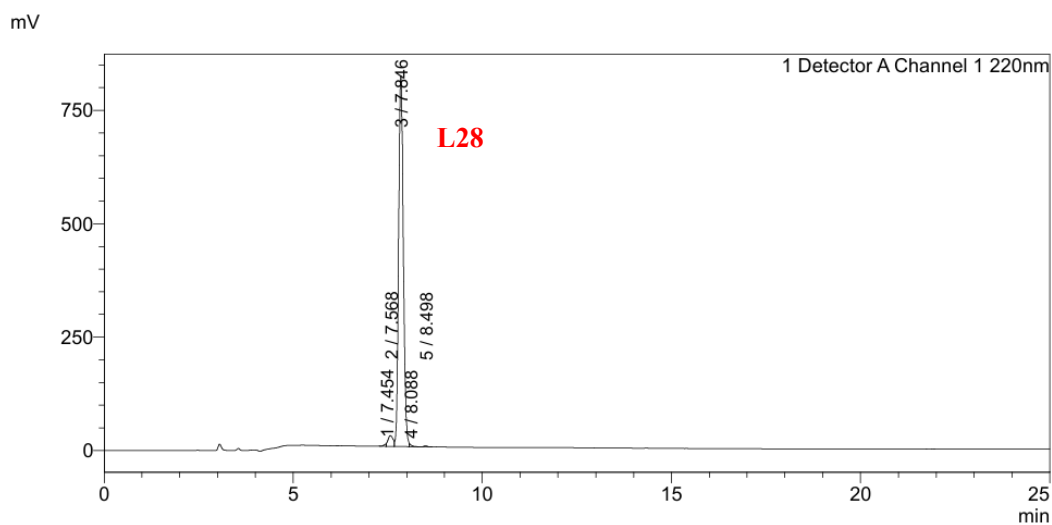

**<Peak Table>**

Detector A Channel 1 220nm

| Peak# | Ret. Time | Area    | Height | Area%   |
|-------|-----------|---------|--------|---------|
| 1     | 7.454     | 19636   | 4900   | 0.268   |
| 2     | 7.568     | 220011  | 23689  | 3.005   |
| 3     | 7.846     | 7053462 | 817377 | 96.326  |
| 4     | 8.088     | 18521   | 5324   | 0.253   |
| 5     | 8.498     | 10878   | 2014   | 0.149   |
| Total |           | 7322509 | 853304 | 100.000 |

**Fig S55** . HPLC-UV chromatogram at 220 nm of **L28**.

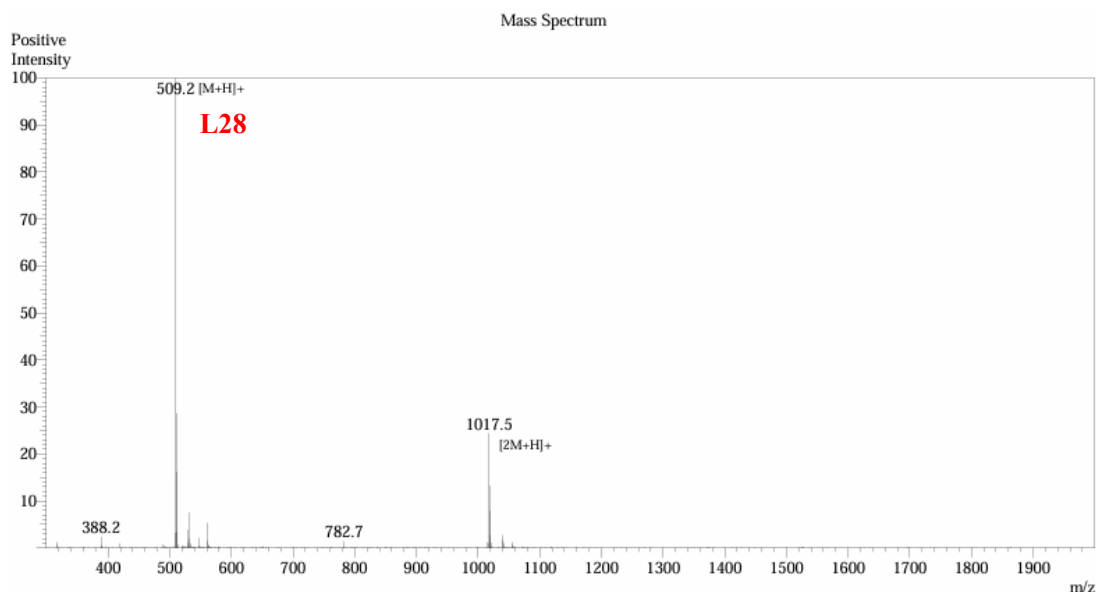

**Fig S56** . ESI-MS spectrum of **L28**. LRMS (ES<sup>+</sup>) m/z: [M+H]<sup>+</sup> calcd for C<sub>18</sub>H<sub>32</sub>N<sub>6</sub>O<sub>7</sub>S<sub>2</sub> 509.2, found 509.2.

**H-Cys-Ala-Ala-Ala-Ala-Ala-Cys-OH (L29)**. Analytical HPLC using Method C, RT = 6.862 min, the HPLC purity is 95%.

<Chromatogram>

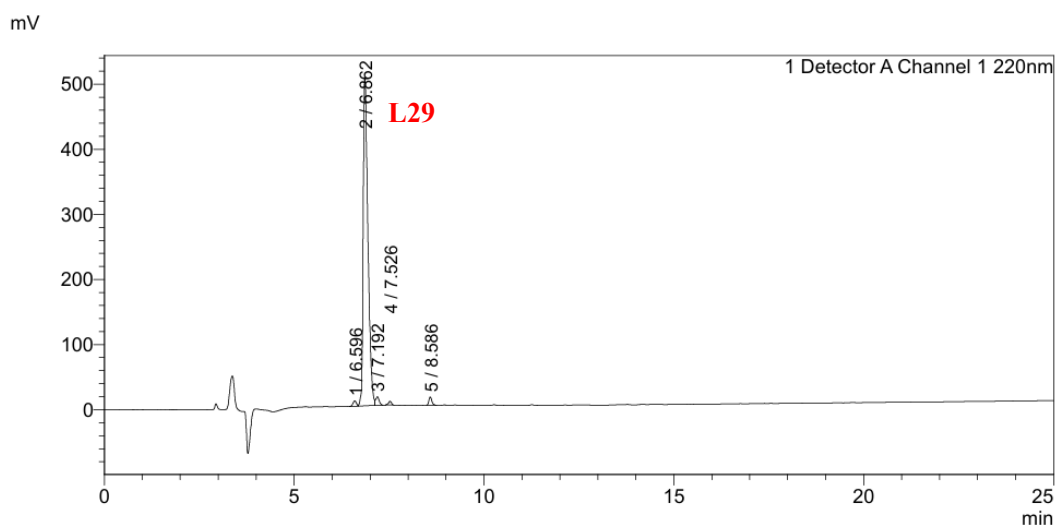

<Peak Table>

Detector A Channel 1 220nm

| Peak# | Ret. Time | Area    | Height | Area%   |
|-------|-----------|---------|--------|---------|
| 1     | 6.596     | 49308   | 8025   | 1.074   |
| 2     | 6.862     | 4362322 | 505782 | 95.021  |
| 3     | 7.192     | 82571   | 12923  | 1.799   |
| 4     | 7.526     | 29666   | 5605   | 0.646   |
| 5     | 8.586     | 67018   | 12531  | 1.460   |
| Total |           | 4590885 | 544866 | 100.000 |

**Fig S57** . HPLC-UV chromatogram at 220 nm of **L29**.

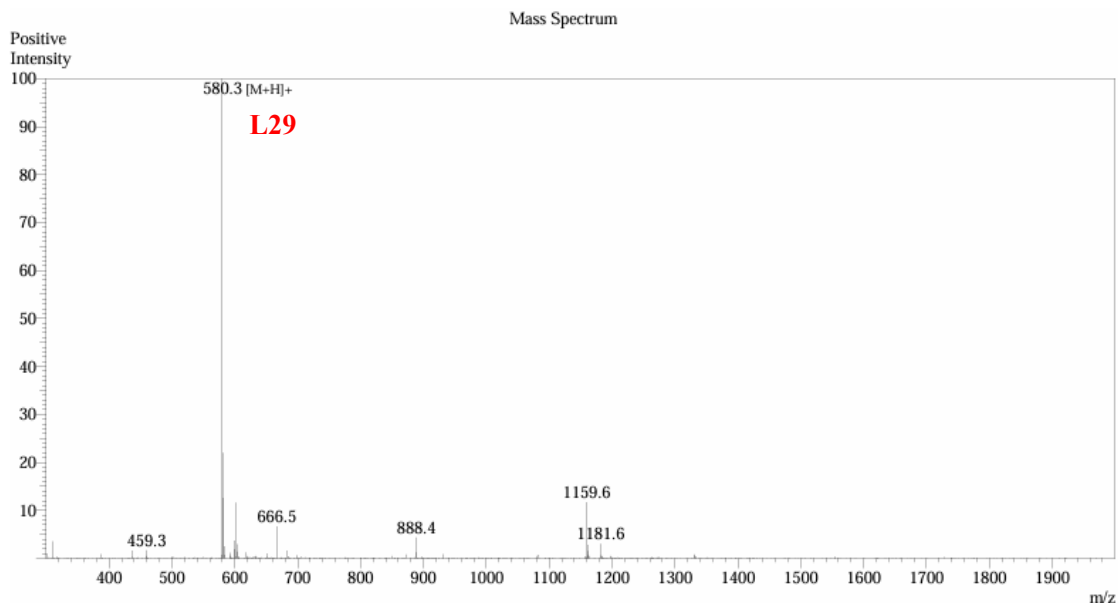

**Fig S58** . ESI-MS spectrum of **L29**. LRMS (ES<sup>+</sup>) m/z: [M+H]<sup>+</sup> calcd for C<sub>21</sub>H<sub>37</sub>N<sub>7</sub>O<sub>8</sub>S<sub>2</sub> 580.2, found 580.3.

**H-Cys-Gly-Ser-Cys-OH (L30)**. Analytical HPLC using Method C, RT = 5.001 min, the HPLC purity is 99%.

**<Chromatogram>**

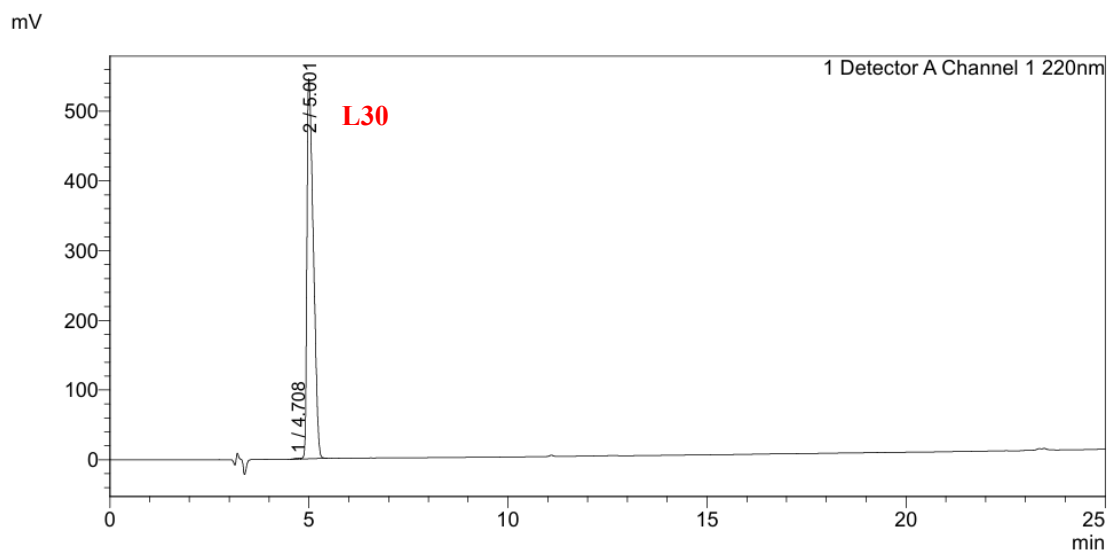

**<Peak Table>**

Detector A Channel 1 220nm

| Peak# | Ret. Time | Area    | Height | Area%   |
|-------|-----------|---------|--------|---------|
| 1     | 4.708     | 11047   | 1224   | 0.181   |
| 2     | 5.001     | 6085951 | 545983 | 99.819  |
| Total |           | 6096998 | 547207 | 100.000 |

**Fig S59**. HPLC-UV chromatogram at 220 nm of **L30**.

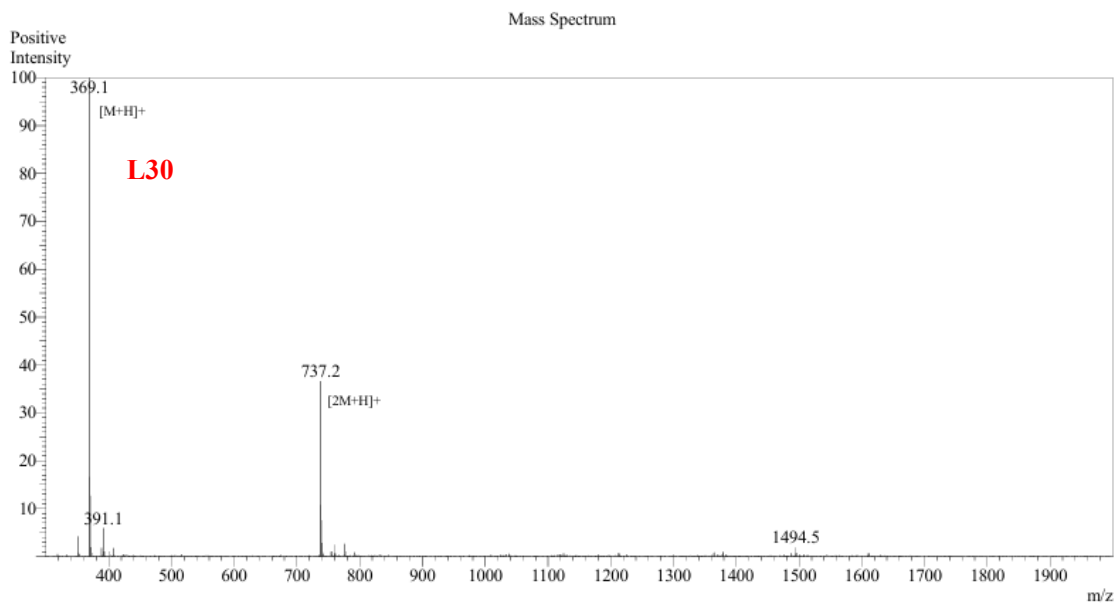

**Fig S60.** ESI-MS spectrum of **L30**. LRMS (ES+) m/z:  $[M+H]^+$  calcd for  $C_{11}H_{20}N_4O_6S_2$  369.1, found 369.1.

**H-Cys-Gly-Ser-Gly-Ser-Cys-OH (L31).** Analytical HPLC using Method D, RT = 12.318 min, the HPLC purity is 96%.

**<Chromatogram>**

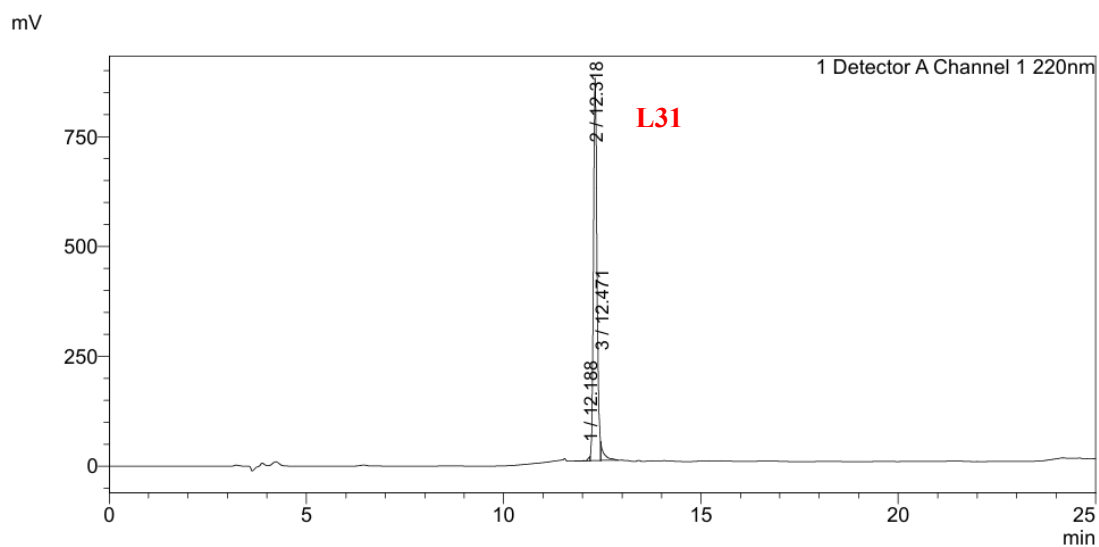

**<Peak Table>**

Detector A Channel 1 220nm

| Peak# | Ret. Time | Area    | Height | Area%   |
|-------|-----------|---------|--------|---------|
| 1     | 12.188    | 34335   | 8002   | 0.600   |
| 2     | 12.318    | 5468257 | 870602 | 95.635  |
| 3     | 12.471    | 215276  | 37263  | 3.765   |
| Total |           | 5717868 | 915867 | 100.000 |

**Fig S61.** HPLC-UV chromatogram at 220 nm of **L31**.

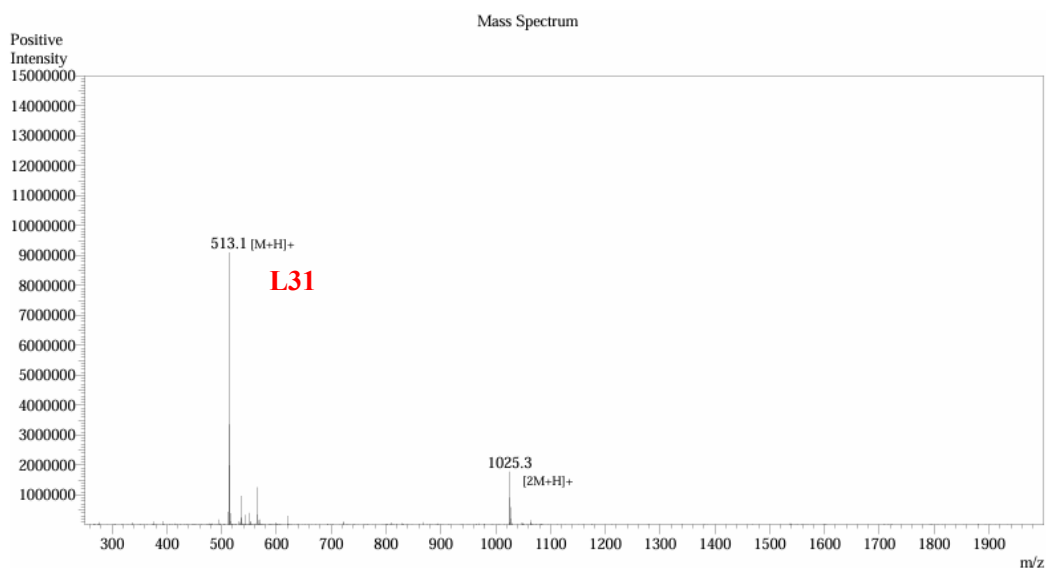

**Fig S62.** ESI-MS spectrum of **L31**. LRMS (ES<sup>+</sup>) m/z: [M+H]<sup>+</sup> calcd for C<sub>16</sub>H<sub>28</sub>N<sub>6</sub>O<sub>9</sub>S<sub>2</sub> 513.1, found 513.1.

**H-Cys-Gly-Ser-Gly-Ser-Gly-Ser-Cys-OH (L32).** Analytical HPLC using Method D, RT = 13.077 min, the HPLC purity is 97%.

<Chromatogram>

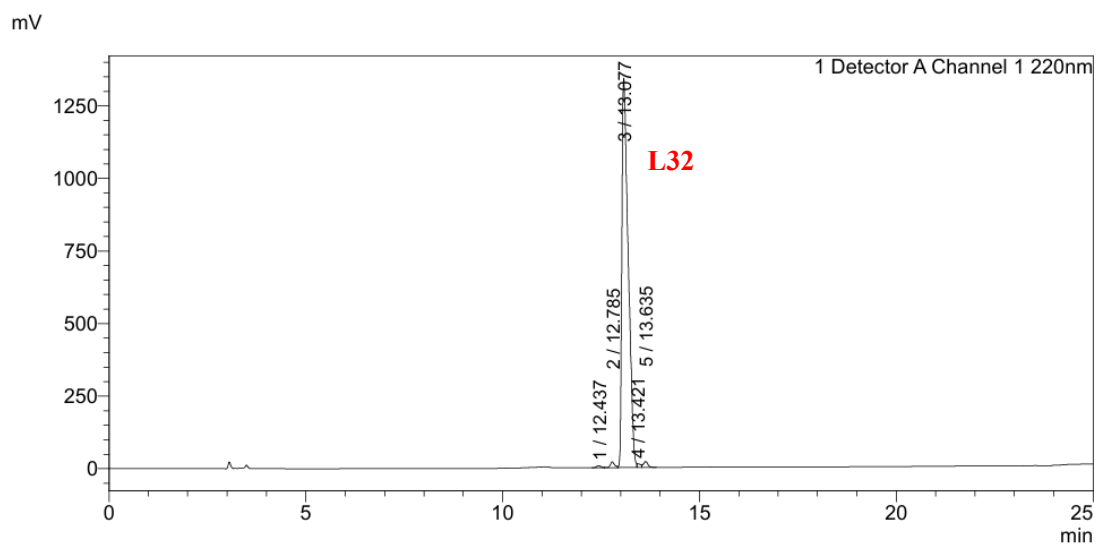

<Peak Table>

| Peak# | Ret. Time | Area     | Height  | Area%   |
|-------|-----------|----------|---------|---------|
| 1     | 12.437    | 50162    | 6654    | 0.326   |
| 2     | 12.785    | 144149   | 19482   | 0.936   |
| 3     | 13.077    | 14968933 | 1342413 | 97.180  |
| 4     | 13.421    | 85590    | 12690   | 0.556   |
| 5     | 13.635    | 154433   | 19905   | 1.003   |
| Total |           | 15403267 | 1401145 | 100.000 |

**Fig S63.** HPLC-UV chromatogram at 220 nm of **L32**.

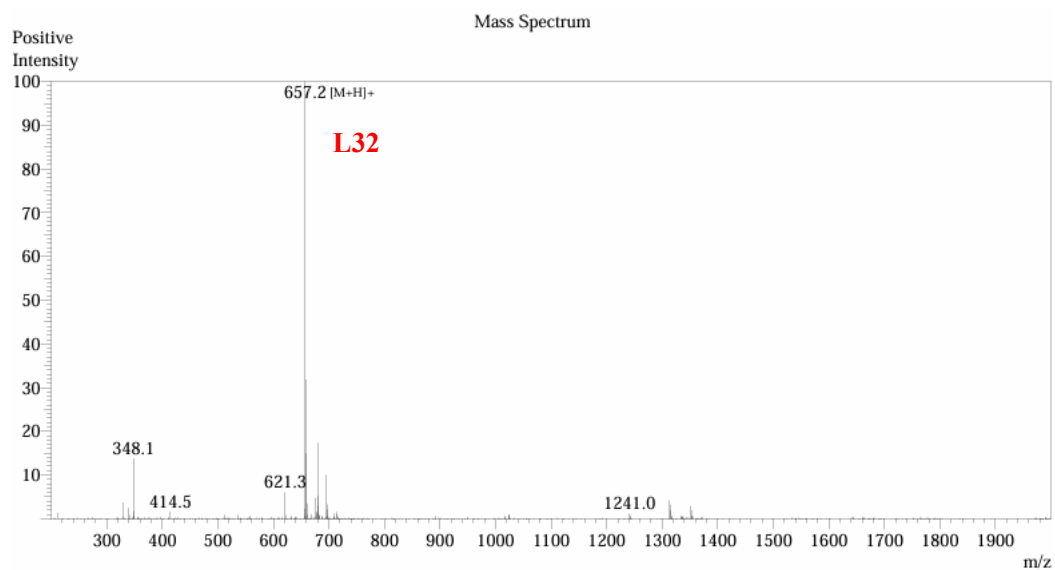

**Fig S64.** ESI-MS spectrum of **L32**. LRMS (ES<sup>+</sup>) m/z: [M+H]<sup>+</sup> calcd for C<sub>21</sub>H<sub>36</sub>N<sub>8</sub>O<sub>12</sub>S<sub>2</sub> 657.2, found 657.2.

**H-Cys-Gly-Ser-Gly-Ser-Gly-Ser-Gly-Ser-Cys-OH (L33).** Analytical HPLC using Method D, RT = 12.813 min, the HPLC purity is 97 %.

<Chromatogram>

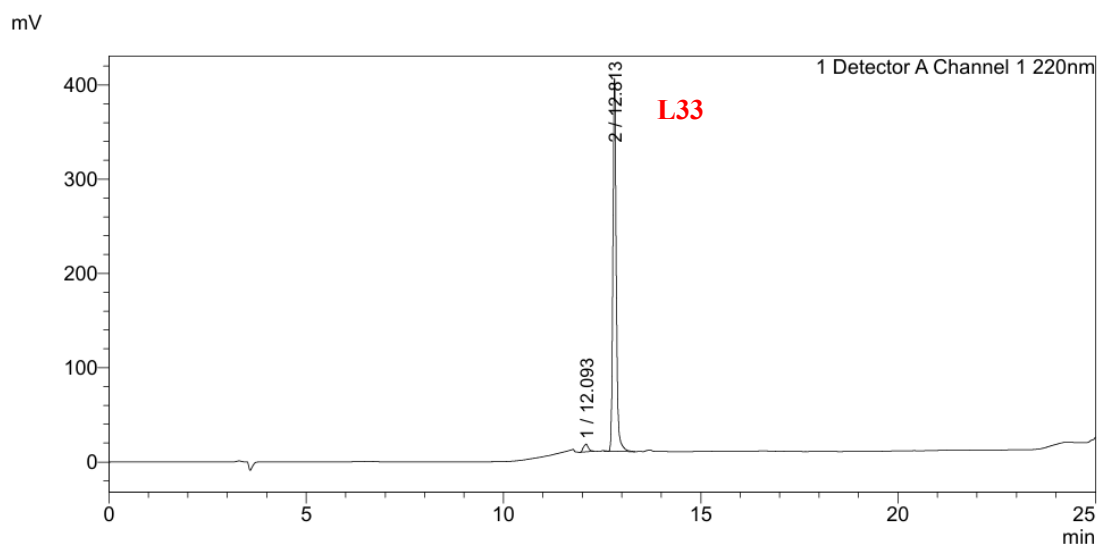

<Peak Table>

| Detector A Channel 1 220nm |           |         |        |         |
|----------------------------|-----------|---------|--------|---------|
| Peak#                      | Ret. Time | Area    | Height | Area%   |
| 1                          | 12.093    | 67608   | 7962   | 2.792   |
| 2                          | 12.813    | 2353947 | 396105 | 97.208  |
| Total                      |           | 2421555 | 404067 | 100.000 |

**Fig S65.** HPLC-UV chromatogram at 220 nm of **L33**.

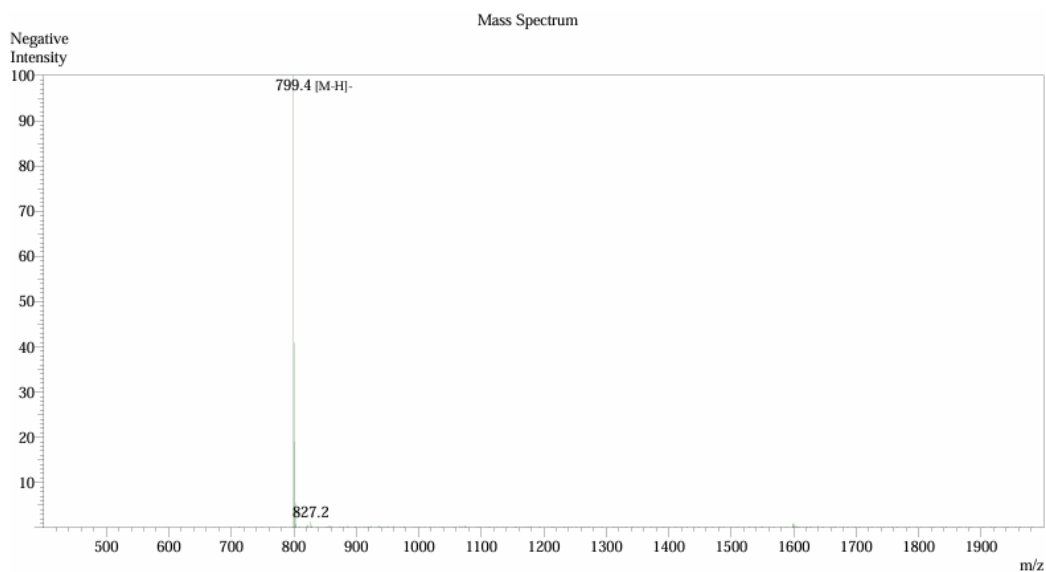

**Fig S66.** ESI-MS spectrum of **L33**. LRMS (ES<sup>+</sup>) m/z: [M+H]<sup>+</sup> calcd for C<sub>26</sub>H<sub>44</sub>N<sub>10</sub>O<sub>15</sub>S<sub>2</sub> 800.2, found 799.4.

**H-Cys-Asn-Gly-Arg-Cys-OH (L34).** Analytical HPLC using Method C, RT = 13.573 min, the HPLC purity is 97%.

<Chromatogram>

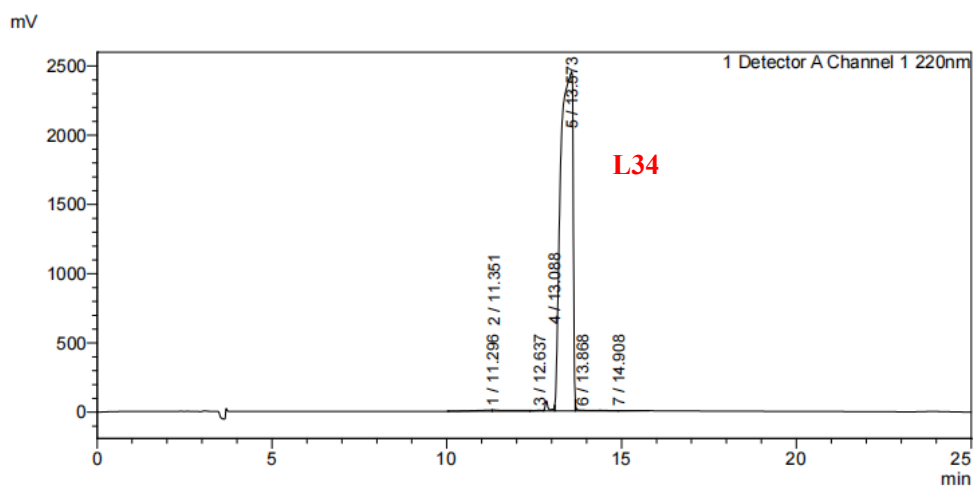

<Peak Table>

| Detector A Channel 1 220nm |           |          |         |         |
|----------------------------|-----------|----------|---------|---------|
| Peak#                      | Ret. Time | Area     | Height  | Area%   |
| 1                          | 11.296    | 263988   | 8154    | 0.435   |
| 2                          | 11.351    | 352489   | 8606    | 0.580   |
| 3                          | 12.637    | 104759   | 6680    | 0.172   |
| 4                          | 13.088    | 494608   | 28824   | 0.814   |
| 5                          | 13.573    | 59166785 | 2450391 | 97.390  |
| 6                          | 13.868    | 319023   | 5588    | 0.525   |
| 7                          | 14.908    | 50520    | 1704    | 0.083   |
| Total                      |           | 60752173 | 2509946 | 100.000 |

**Fig S67.** HPLC-UV chromatogram at 220 nm of **L34**.

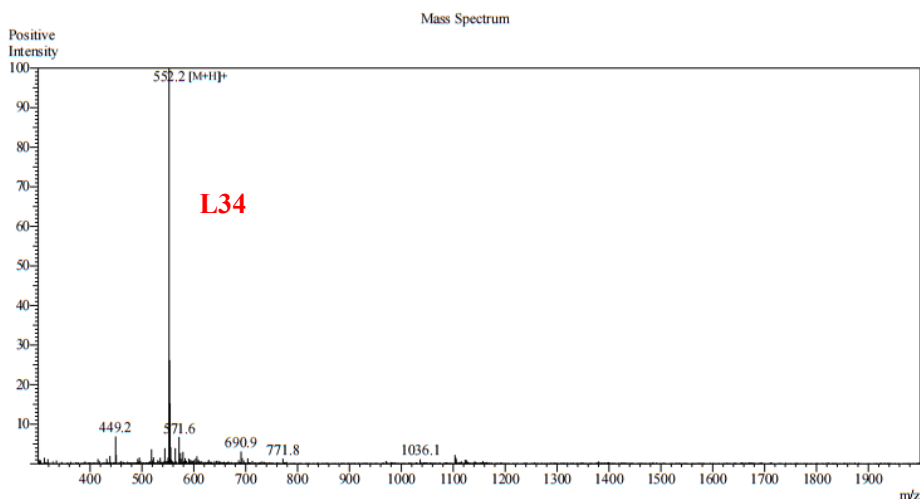

**Fig S68.** ESI-MS spectrum of **L34**. LRMS (ES+) m/z: [M+H]<sup>+</sup> calcd for C<sub>18</sub>H<sub>33</sub>N<sub>9</sub>O<sub>7</sub>S<sub>2</sub> 552.2, found 552.2.

**H-Cys-Ser-Pro-Tyr-Gly-Arg-Cys-OH (L35).** Analytical HPLC using Method C, RT = 6.858 min, the HPLC purity is 96%.

<Chromatogram>

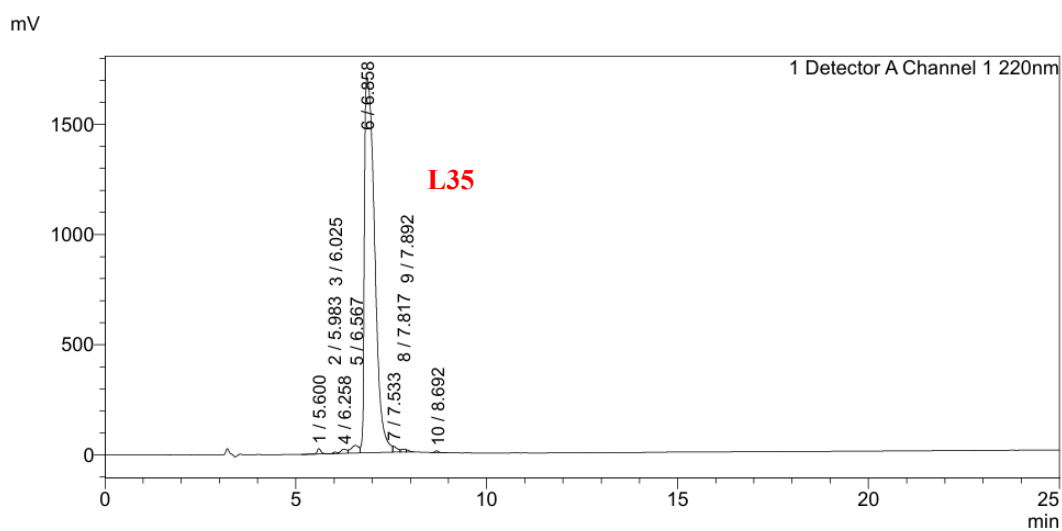

<Peak Table>

| Detector A Channel 1 220nm |           |          |         |         |
|----------------------------|-----------|----------|---------|---------|
| Peak#                      | Ret. Time | Area     | Height  | Area%   |
| 1                          | 5.600     | 156844   | 24464   | 0.476   |
| 2                          | 5.983     | 1122     | 3800    | 0.003   |
| 3                          | 6.025     | 40913    | 7548    | 0.124   |
| 4                          | 6.258     | 204388   | 19368   | 0.620   |
| 5                          | 6.567     | 490577   | 34548   | 1.489   |
| 6                          | 6.858     | 31597556 | 1703424 | 95.911  |
| 7                          | 7.533     | 229614   | 28196   | 0.697   |
| 8                          | 7.817     | 110490   | 13220   | 0.335   |
| 9                          | 7.892     | 50002    | 9983    | 0.152   |
| 10                         | 8.692     | 63152    | 9044    | 0.192   |
| Total                      |           | 32944659 | 1853596 | 100.000 |

**Fig S69.** HPLC-UV chromatogram at 220 nm of **L35**.

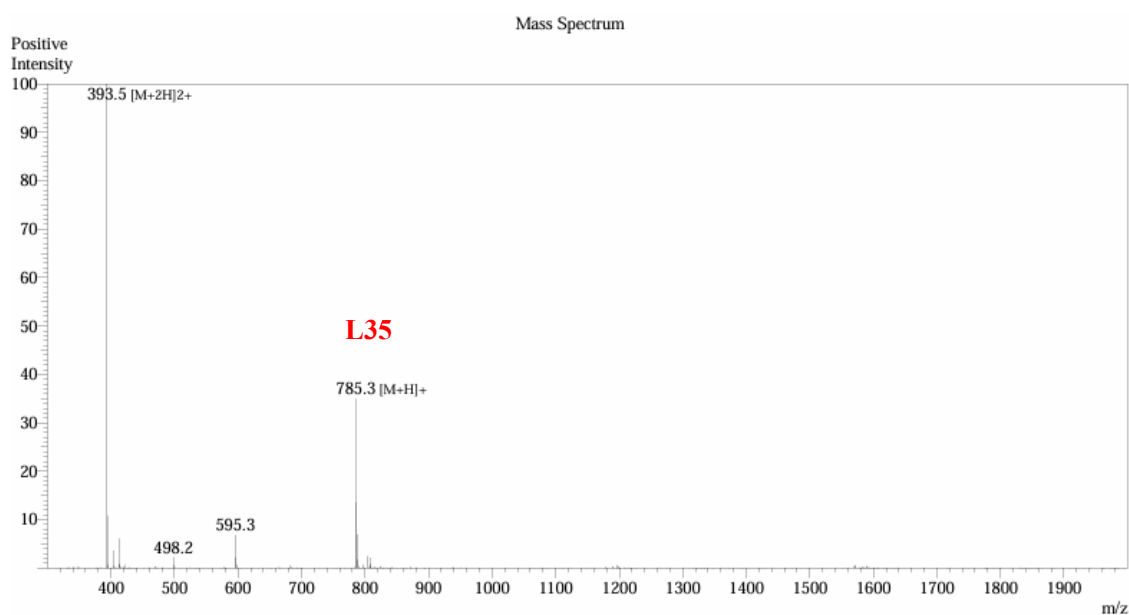

**Fig S70.** ESI-MS spectrum of **L35**. LRMS (ES<sup>+</sup>) m/z: [M+H]<sup>+</sup> calcd for C<sub>31</sub>H<sub>48</sub>N<sub>10</sub>O<sub>10</sub>S<sub>2</sub> 785.3, found 785.3.

**H-Cys-Pro-Pro-Thr-Gln-Phe-Cys-OH (L36).** Analytical HPLC using Method C, RT = 10.383 min, the HPLC purity is 96%.

**<Chromatogram>**

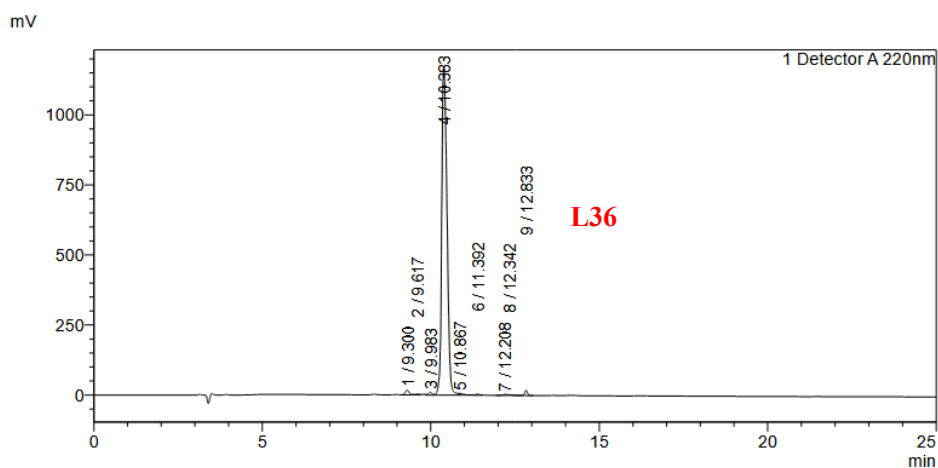

**<Peak Table>**

| Detector A 220nm |           |          |         |         |
|------------------|-----------|----------|---------|---------|
| Peak#            | Ret. Time | Area     | Height  | Area%   |
| 1                | 9.300     | 143083   | 16863   | 1.079   |
| 2                | 9.617     | 32011    | 3307    | 0.241   |
| 3                | 9.983     | 80303    | 10314   | 0.606   |
| 4                | 10.383    | 12727825 | 1165278 | 95.983  |
| 5                | 10.867    | 64374    | 6436    | 0.485   |
| 6                | 11.392    | 44499    | 3960    | 0.336   |
| 7                | 12.208    | 34153    | 4021    | 0.258   |
| 8                | 12.342    | 28367    | 2502    | 0.214   |
| 9                | 12.833    | 105840   | 18907   | 0.798   |
| Total            |           | 13260455 | 1231587 | 100.000 |

**Fig S71.** HPLC-UV chromatogram at 220 nm of **L36**.

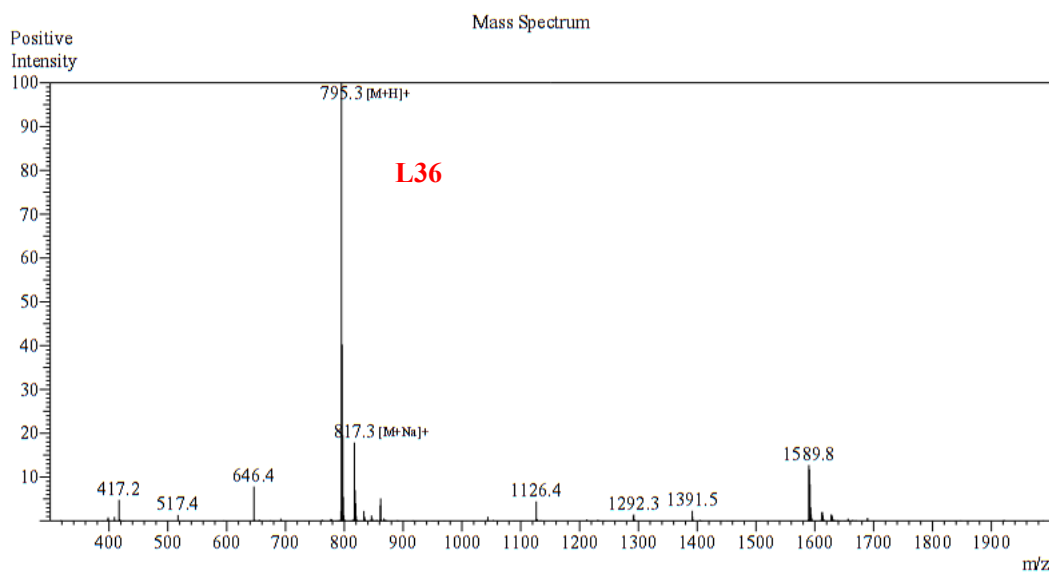

**Fig S72.** ESI-MS spectrum of **L36**. LRMS (ES<sup>+</sup>) m/z: [M+H]<sup>+</sup> calcd for C<sub>34</sub>H<sub>50</sub>N<sub>8</sub>O<sub>10</sub>S<sub>2</sub> 795.3, found 795.3.

**H-Cys-Tyr-Phe-Gln-Asn-Cys-Pro-Arg-Gly-OH (L37).** Analytical HPLC using Method C, RT = 10.592 min, the HPLC purity is 96%.

<Chromatogram>

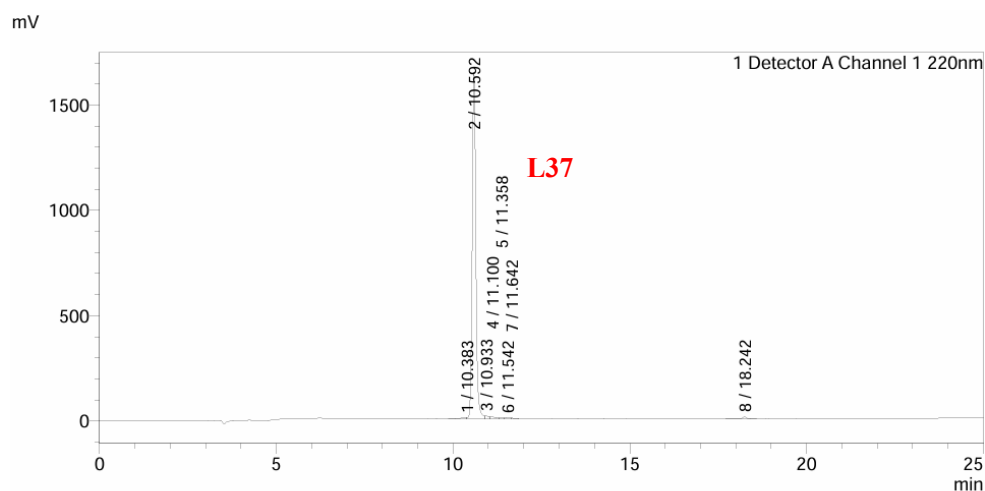

<Peak Table>

Detector A Channel 1 220nm

| Peak# | Ret. Time | Area     | Height  | Area%   |
|-------|-----------|----------|---------|---------|
| 1     | 10.383    | 73708    | 7064    | 0.596   |
| 2     | 10.592    | 11866984 | 1646672 | 95.891  |
| 3     | 10.933    | 105996   | 13985   | 0.857   |
| 4     | 11.100    | 118253   | 11510   | 0.956   |
| 5     | 11.358    | 35609    | 4291    | 0.288   |
| 6     | 11.542    | 54614    | 6169    | 0.441   |
| 7     | 11.642    | 38040    | 3772    | 0.307   |
| 8     | 18.242    | 82235    | 10043   | 0.665   |
| Total |           | 12375441 | 1703505 | 100.000 |

**Fig S73.** HPLC-UV chromatogram at 220 nm of **L37**.

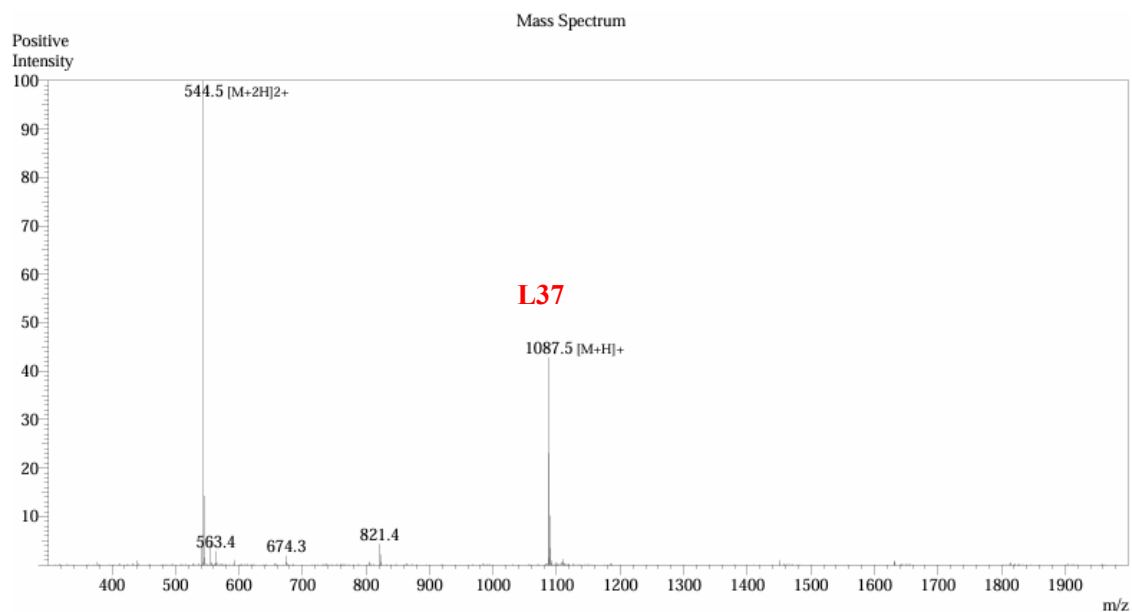

**Fig S74.** ESI-MS spectrum of **L37**. LRMS (ES+) m/z: [M+H]<sup>+</sup> calcd for C<sub>46</sub>H<sub>66</sub>N<sub>14</sub>O<sub>13</sub>S<sub>2</sub> 1087.4, found 1087.5.

**H-Cys-Arg-Gly-Asp-Lys-Gly-Pro-Asp-Cys-OH (L38).** Analytical HPLC using Method C, RT = 4.300 min, the HPLC purity is 96%.

**<Chromatogram>**

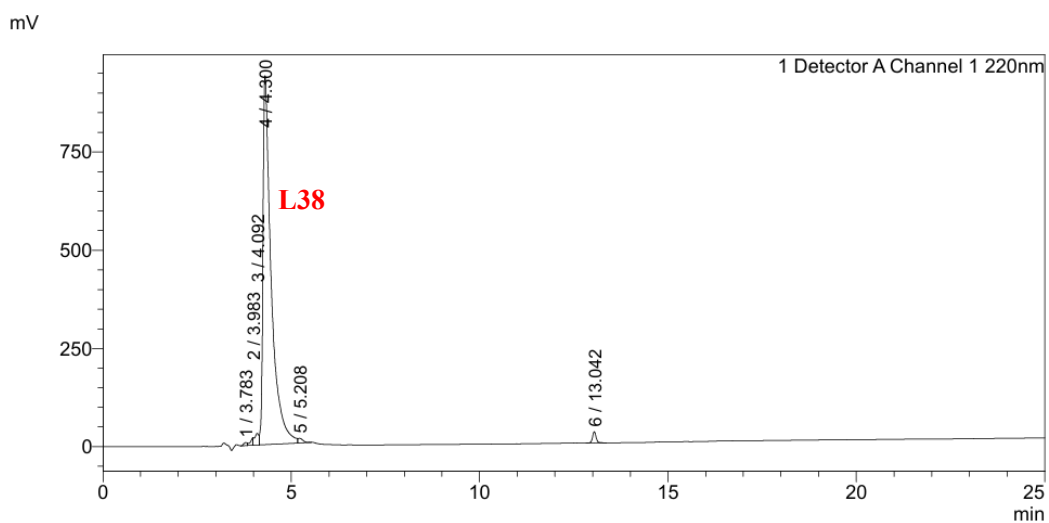

**<Peak Table>**

| Detector A Channel 1 220nm |           |          |         |         |
|----------------------------|-----------|----------|---------|---------|
| Peak#                      | Ret. Time | Area     | Height  | Area%   |
| 1                          | 3.783     | 47791    | 7877    | 0.319   |
| 2                          | 3.983     | 92517    | 19391   | 0.618   |
| 3                          | 4.092     | 225821   | 29709   | 1.509   |
| 4                          | 4.300     | 14299961 | 939448  | 95.561  |
| 5                          | 5.208     | 106677   | 12070   | 0.713   |
| 6                          | 13.042    | 191529   | 29131   | 1.280   |
| Total                      |           | 14964296 | 1037626 | 100.000 |

**Fig S75.** HPLC-UV chromatogram at 220 nm of **L38**.

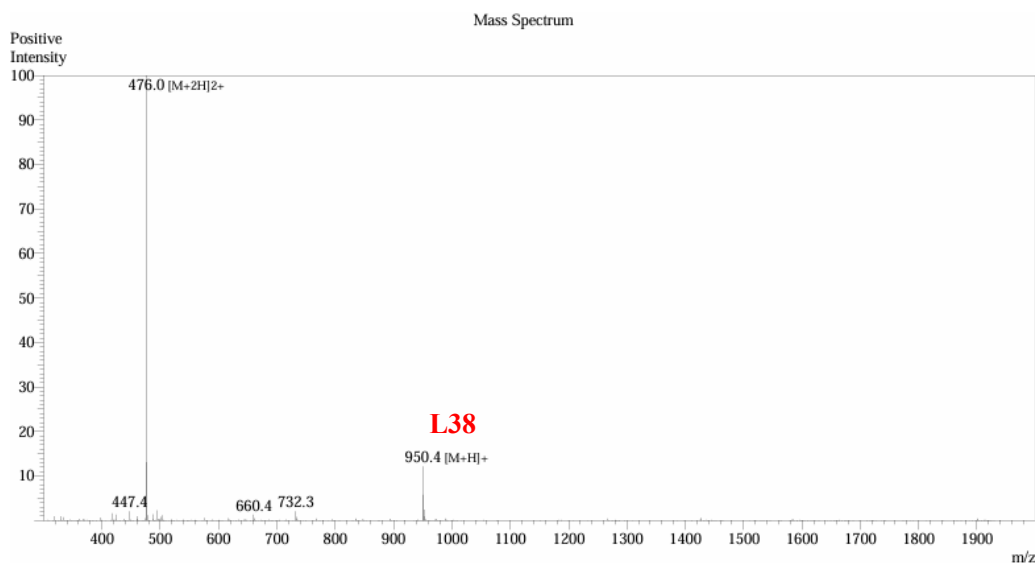

**Fig S76.** ESI-MS spectrum of **L38**. LRMS (ES+) m/z: [M+H]<sup>+</sup> calcd for C<sub>35</sub>H<sub>59</sub>N<sub>13</sub>O<sub>14</sub>S<sub>2</sub> 950.4, found 950.4.

**H-Cys-Lys-Ser-{D-Ala}-His-{D-Phe}-Lys-Trp-Cys-OH (L39).** Analytical HPLC using Method C, RT = 9.706 min, the HPLC purity is 97%.

<Chromatogram>

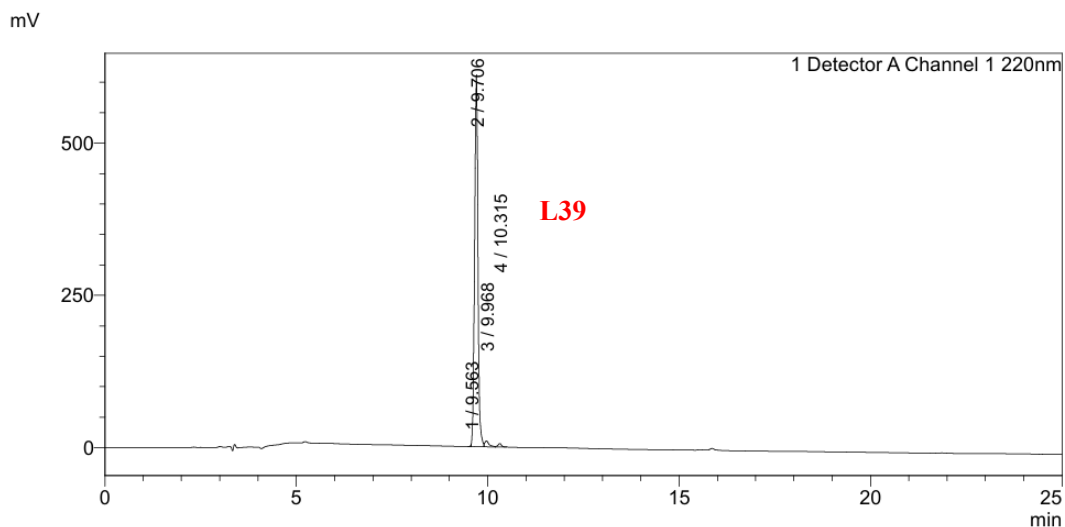

<Peak Table>

Detector A Channel 1 220nm

| Peak# | Ret. Time | Area    | Height | Area%   |
|-------|-----------|---------|--------|---------|
| 1     | 9.563     | 3650    | 1850   | 0.095   |
| 2     | 9.706     | 3746516 | 611406 | 97.004  |
| 3     | 9.968     | 75103   | 9803   | 1.945   |
| 4     | 10.315    | 36977   | 5785   | 0.957   |
| Total |           | 3862245 | 628844 | 100.000 |

**Fig S77.** HPLC-UV chromatogram at 220 nm of **L39**.

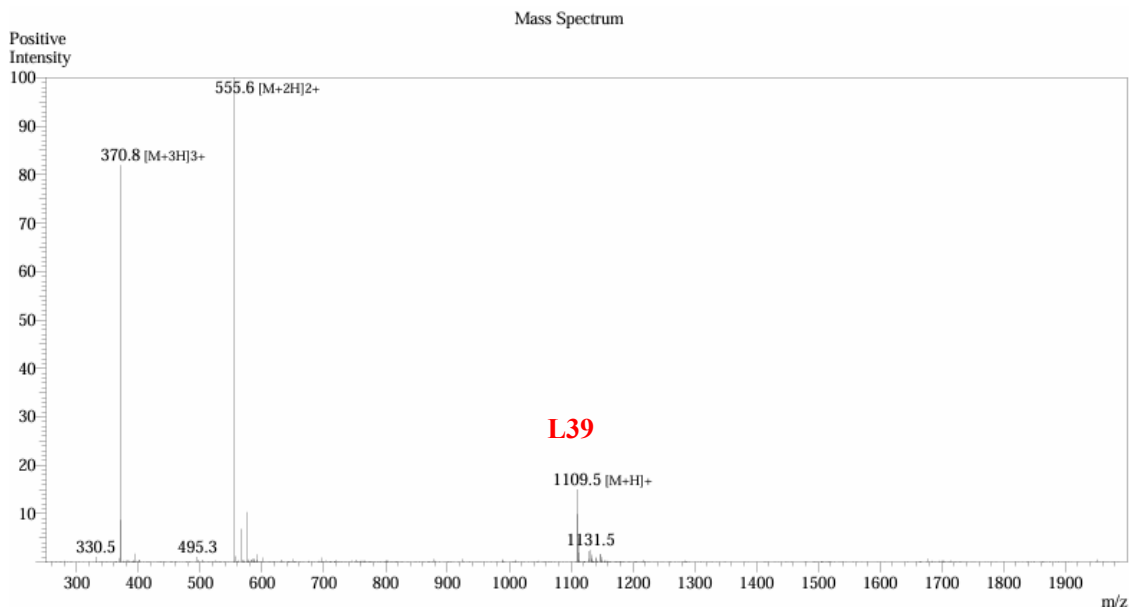

**Fig S78.** ESI-MS spectrum of **L39**. LRMS (ES+) m/z: [M+H]<sup>+</sup> calcd for C<sub>50</sub>H<sub>72</sub>N<sub>14</sub>O<sub>11</sub>S<sub>2</sub> 1109.5, found 1109.5.

**H-Cys-Thr-Gly-Arg-Ala-Lys-Arg-Arg-Met-Gln-Tyr-Asn-Arg-Arg-Gly-Cys-OH (L40).** Analytical HPLC using Method C, RT = 6.001 min, the HPLC purity is 95%.

<Chromatogram>

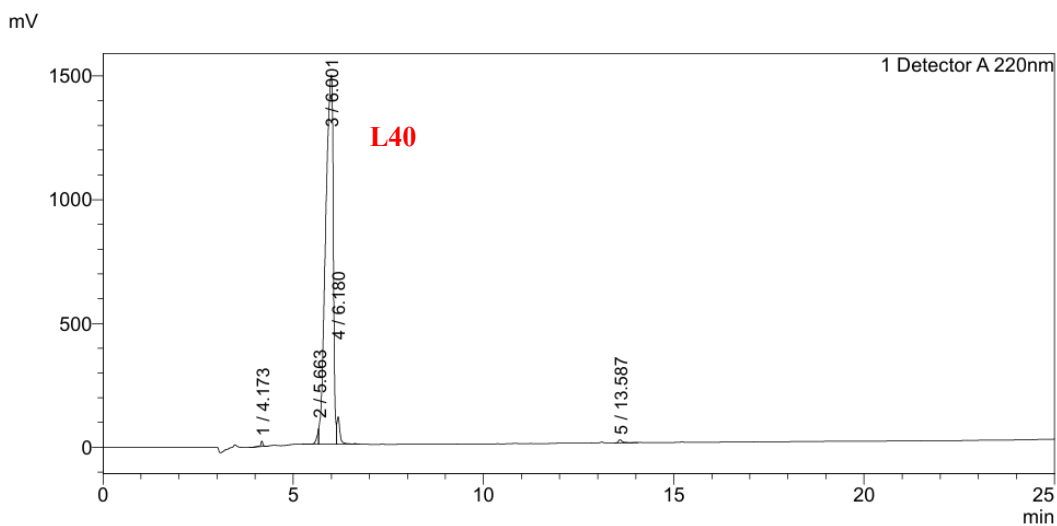

<Peak Table>

| Detector A 220nm |           |          |         |         |
|------------------|-----------|----------|---------|---------|
| Peak#            | Ret. Time | Area     | Height  | Area%   |
| 1                | 4.173     | 83956    | 21514   | 0.386   |
| 2                | 5.663     | 209527   | 53780   | 0.963   |
| 3                | 6.001     | 20744190 | 1491703 | 95.299  |
| 4                | 6.180     | 637627   | 110693  | 2.929   |
| 5                | 13.587    | 92267    | 12903   | 0.424   |
| Total            |           | 21767566 | 1690592 | 100.000 |

**Fig S79.** HPLC-UV chromatogram at 220 nm of **L40**.

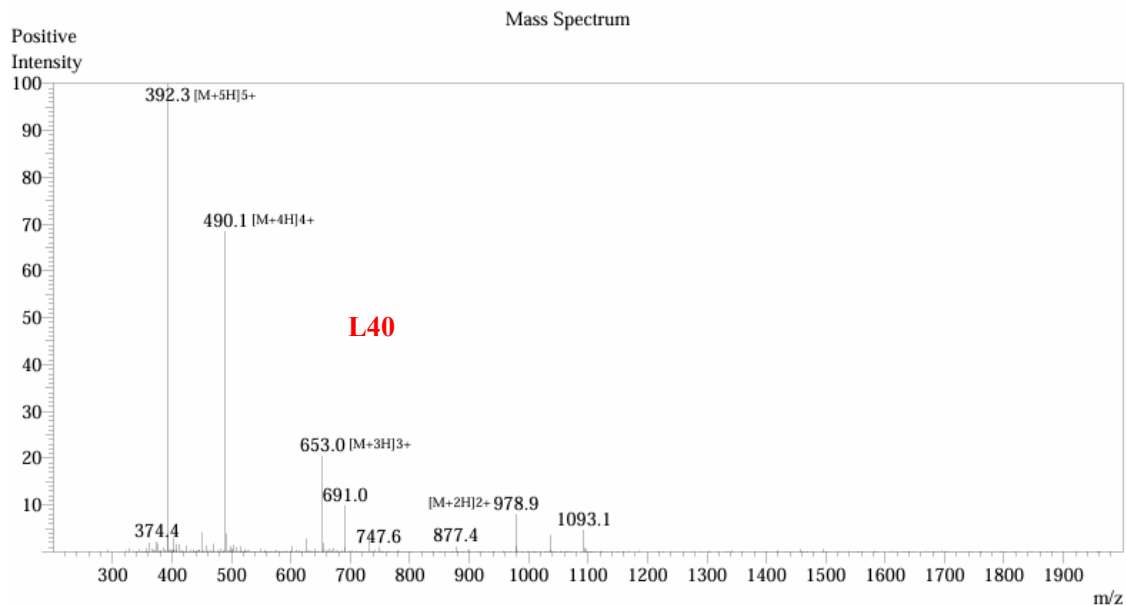

**Fig S80.** ESI-MS spectrum of **L40**. LRMS (ES+) m/z:  $[M+2H]^{2+}$  calcd for  $C_{76}H_{134}N_{34}O_{11}S_2$  978.5, found 978.9.

**H-Cys-{D-Tyr}-Arg-Gln-Phe-Asn-Arg-Arg-Thr-His-Glu-Val-Trp-Asn-Leu-Asp-Cys-OH (L41).** Analytical HPLC using Method C, RT =12.336 min, the HPLC purity is 98%.

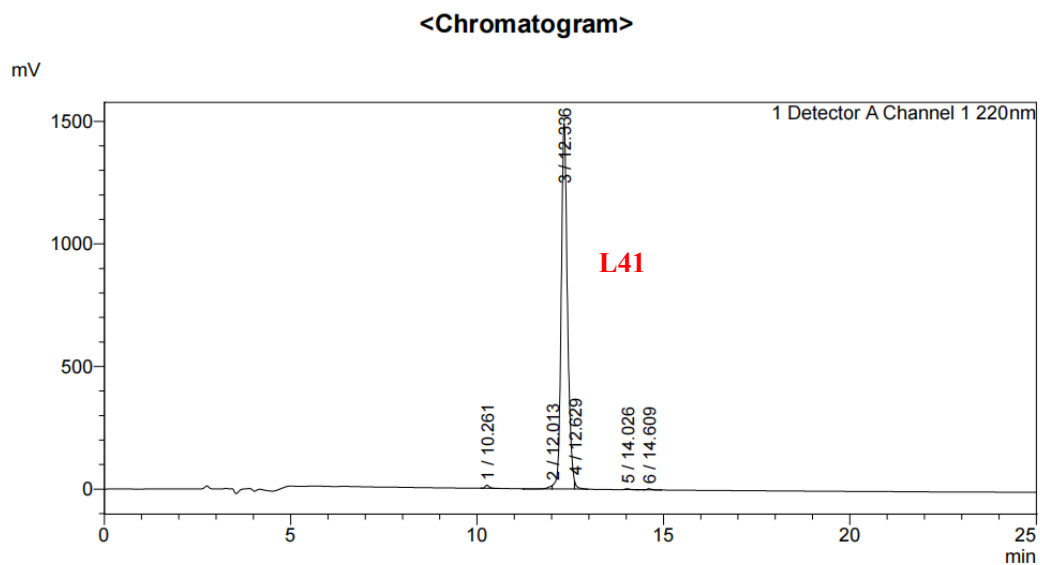

**<Peak Table>**

Detector A Channel 1 220nm

| Peak# | Ret. Time | Area     | Height  | Area%   |
|-------|-----------|----------|---------|---------|
| 1     | 10.261    | 97308    | 13036   | 0.548   |
| 2     | 12.013    | 89086    | 12754   | 0.502   |
| 3     | 12.336    | 17389535 | 1492317 | 97.963  |
| 4     | 12.629    | 112923   | 28062   | 0.636   |
| 5     | 14.026    | 25073    | 3345    | 0.141   |
| 6     | 14.609    | 37205    | 4813    | 0.210   |
| Total |           | 17751131 | 1554327 | 100.000 |

**Fig S81.** HPLC-UV chromatogram at 220 nm of L41.

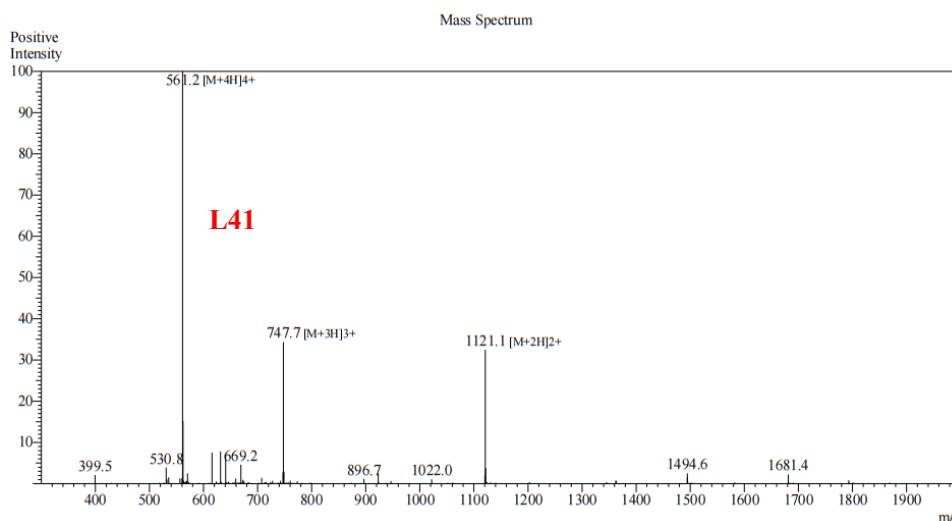

**Fig S82.** ESI-MS spectrum of L41. LRMS (ES+) m/z: [M+2H]<sup>2+</sup> calcd for C<sub>96</sub>H<sub>142</sub>N<sub>32</sub>O<sub>27</sub>S<sub>2</sub> 1121.0, found 1121.1.

**H-Cys-{D-Tyr}-Leu-Ile-Thr-Phe-Arg-Gln-Trp-Ala-Phe-Asn-Leu-Pro-Cys-Gly (L42).** Analytical HPLC using Method C, RT = 17.283 min, the HPLC purity is 95%.

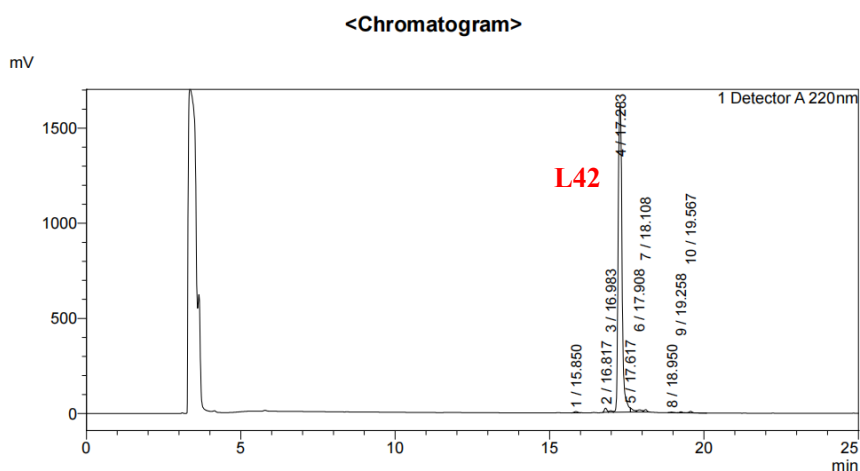

<Peak Table>

| Peak# | Ret. Time | Area     | Height  | Area%   |
|-------|-----------|----------|---------|---------|
| 1     | 15.850    | 60244    | 6924    | 0.409   |
| 2     | 16.817    | 125873   | 21848   | 0.855   |
| 3     | 16.983    | 52907    | 8047    | 0.359   |
| 4     | 17.283    | 13996994 | 1605990 | 95.108  |
| 5     | 17.617    | 139492   | 21541   | 0.948   |
| 6     | 17.908    | 119523   | 11133   | 0.812   |
| 7     | 18.108    | 79955    | 12348   | 0.543   |
| 8     | 18.950    | 30138    | 3304    | 0.205   |
| 9     | 19.258    | 36996    | 5294    | 0.251   |
| 10    | 19.567    | 74817    | 8242    | 0.508   |
| Total |           | 14716939 | 1704670 | 100.000 |

Detector A 220nm

**Fig S83.** HPLC-UV chromatogram at 220 nm of L42.

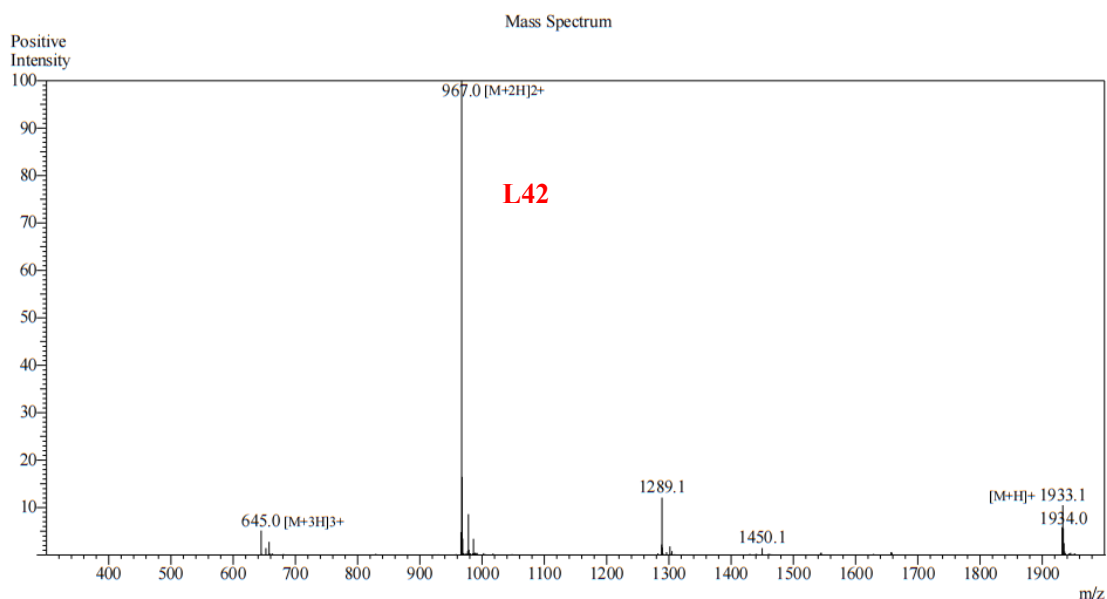

**Fig S84.** ESI-MS spectrum of **L42**. LRMS (ES<sup>+</sup>) m/z: [M+2H]<sup>2+</sup> calcd for C<sub>91</sub>H<sub>130</sub>N<sub>22</sub>O<sub>21</sub>S<sub>2</sub> 966.5, found 967.0.

**H-Cys-Asp-Asn-Ile-Lys-His-Val-Pro-Gly-Gly-Gly-Ser-Val-Gln-Ile-Val-Tyr-Lys-Pro-Val-Cys-OH (L43)**. Analytical HPLC using Method C, RT = 9.086 min, the HPLC purity is 98%.

**<Chromatogram>**

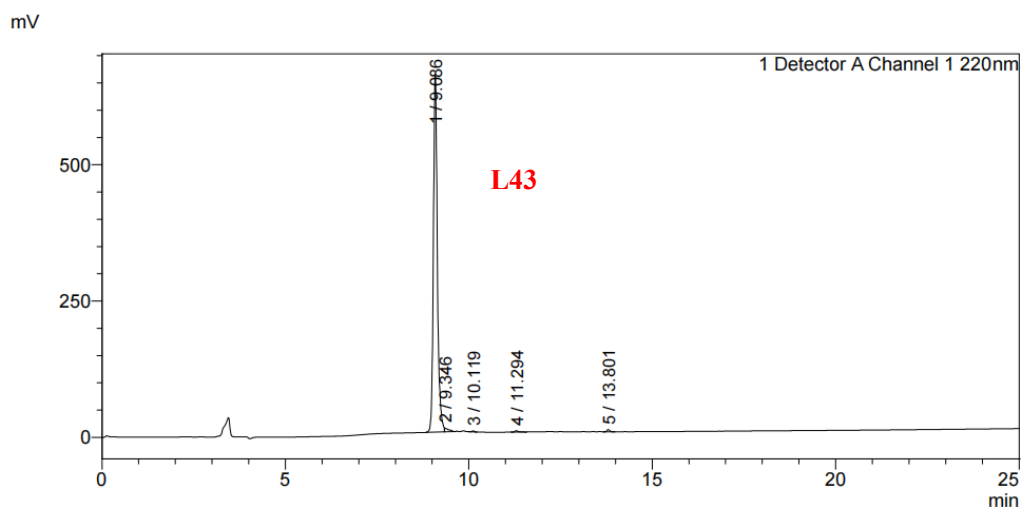

**<Peak Table>**

Detector A Channel 1 220nm

| Peak# | Ret. Time | Area    | Height | Area%   |
|-------|-----------|---------|--------|---------|
| 1     | 9.086     | 4916597 | 656453 | 98.054  |
| 2     | 9.346     | 53442   | 6621   | 1.066   |
| 3     | 10.119    | 7009    | 1744   | 0.140   |
| 4     | 11.294    | 16156   | 2565   | 0.322   |
| 5     | 13.801    | 20967   | 4185   | 0.418   |
| Total |           | 5014172 | 671567 | 100.000 |

**Fig S85.** HPLC-UV chromatogram at 220 nm of **L43**.

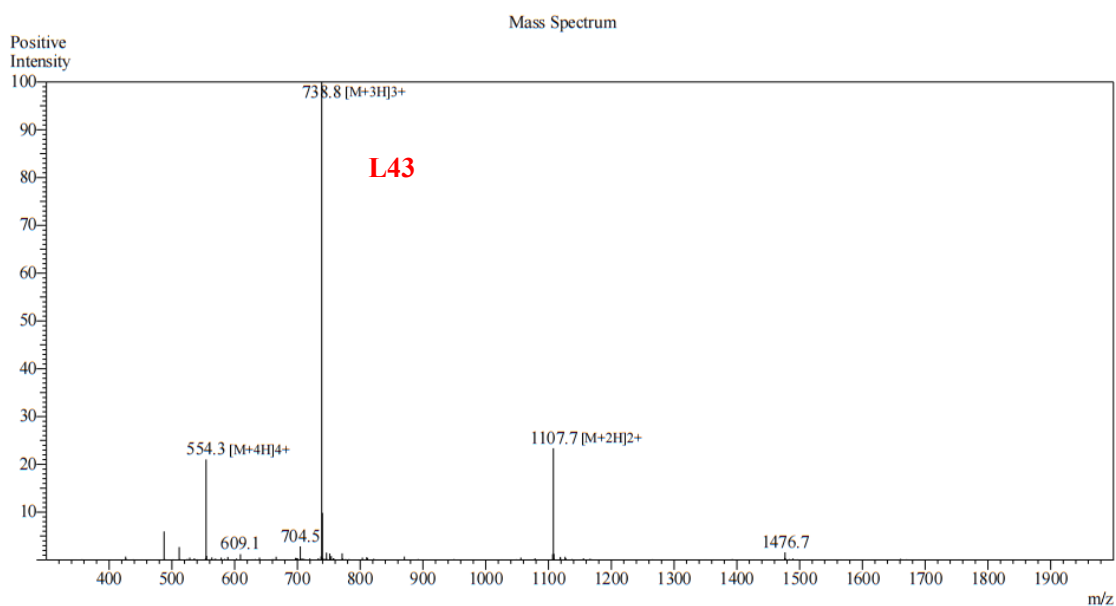

**Fig S86.** ESI-MS spectrum of **L43**. LRMS (ES+) m/z:  $[M+2H]^{2+}$  calcd for  $C_{97}H_{157}N_{27}O_{28}S_2$  1107.1, found 1107.7.

**Ac-Cys-Arg-Gly-Asp-Lys-Gly-Pro-Asp-Cys-OH (L44).** Analytical HPLC using Method C, RT = 7.876 min, the HPLC purity is 96%.

**<Chromatogram>**

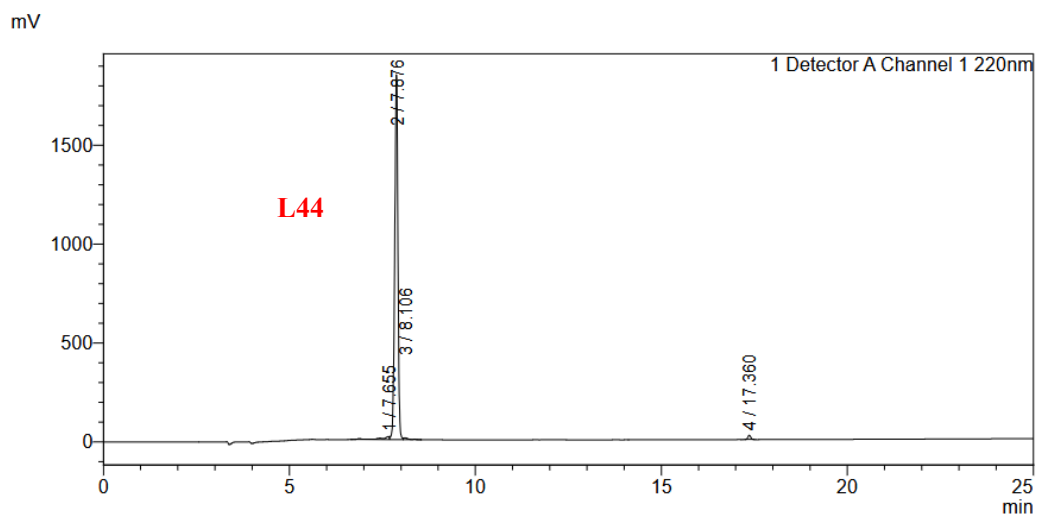

**<Peak Table>**

Detector A Channel 1 220nm

| Peak# | Ret. Time | Area     | Height  | Area%   |
|-------|-----------|----------|---------|---------|
| 1     | 7.655     | 249958   | 15541   | 2.184   |
| 2     | 7.876     | 10994088 | 1845426 | 96.073  |
| 3     | 8.106     | 83735    | 9323    | 0.732   |
| 4     | 17.360    | 115706   | 21473   | 1.011   |
| Total |           | 11443488 | 1891764 | 100.000 |

**Fig S87.** HPLC-UV chromatogram at 220 nm of **L44**.

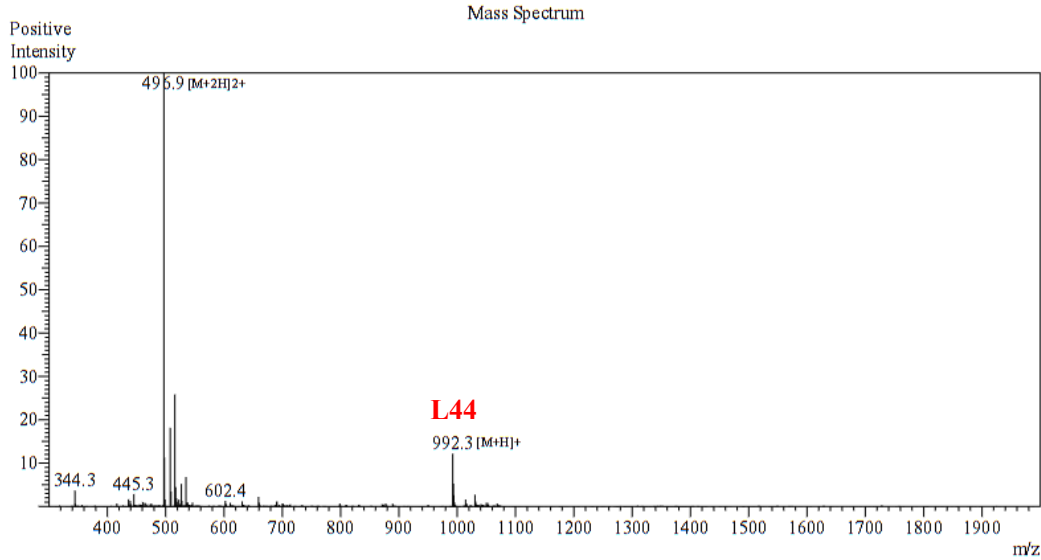

**Fig S88.** ESI-MS spectrum of **L44**. LRMS (ES+) m/z: [M+H]<sup>+</sup> calcd for C<sub>37</sub>H<sub>61</sub>N<sub>13</sub>O<sub>15</sub>S<sub>2</sub> 992.4, found 992.3.

**H-Cys-Arg-Gly-Asp-Ala-Arg-Gly-Asp-Cys-OH (L45).** Analytical HPLC using Method C, RT =14.317 min, the HPLC purity is 96%.

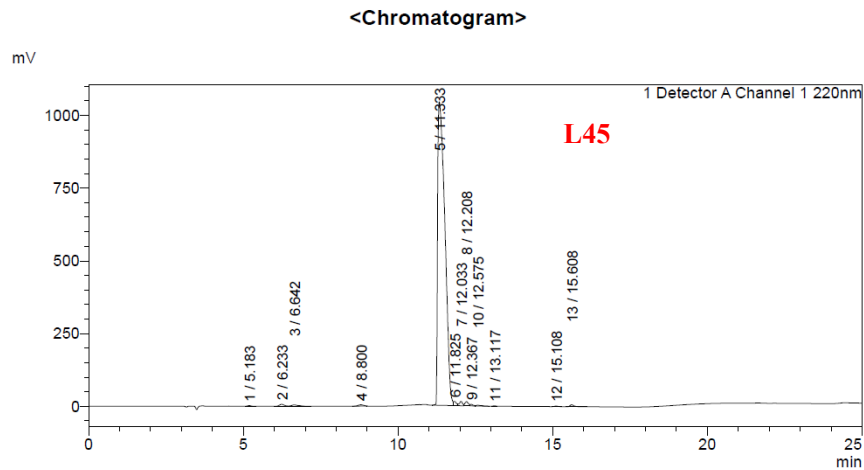

<Peak Table>

| Peak# | Ret. Time | Area     | Height  | Area%   |
|-------|-----------|----------|---------|---------|
| 1     | 5.183     | 19904    | 2700    | 0.114   |
| 2     | 6.233     | 74636    | 6782    | 0.426   |
| 3     | 6.642     | 71854    | 4568    | 0.410   |
| 4     | 8.800     | 56031    | 4575    | 0.320   |
| 5     | 11.333    | 16863021 | 1043604 | 96.220  |
| 6     | 11.825    | 83005    | 14318   | 0.474   |
| 7     | 12.033    | 109233   | 15179   | 0.623   |
| 8     | 12.208    | 110059   | 14531   | 0.628   |
| 9     | 12.367    | 32828    | 5052    | 0.187   |
| 10    | 12.575    | 30251    | 2683    | 0.173   |
| 11    | 13.117    | 7709     | 1445    | 0.044   |
| 12    | 15.108    | 12467    | 1947    | 0.071   |
| 13    | 15.608    | 54415    | 6366    | 0.310   |
| Total |           | 17525414 | 1123751 | 100.000 |

**Fig S89.** HPLC-UV chromatogram at 220 nm of **L45**.

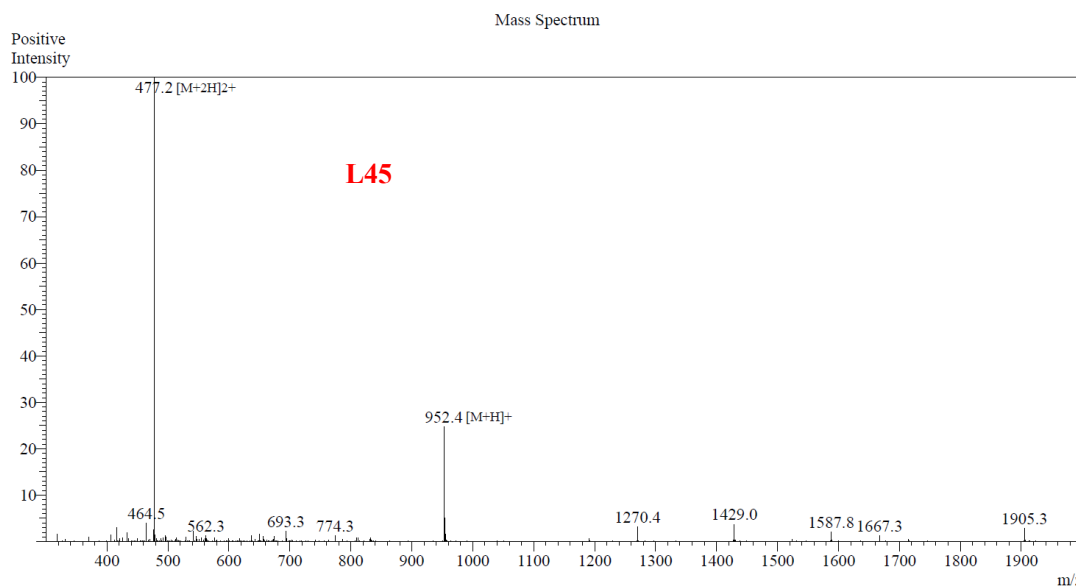

**Fig S90.** ESI-MS spectrum of **L45**. LRMS (ES+) m/z: [M+H]<sup>+</sup> calcd for C<sub>33</sub>H<sub>57</sub>N<sub>15</sub>O<sub>14</sub>S<sub>2</sub> 752.36, found 952.4.

## 4. Development and optimization of the 3,6-DCT mediated cyclodimerization reaction

### 4.1 Calibration for LC-MS yield calculation

#### (1) Establishment of the Quantification Method

To ensure absolute quantification accuracy and address potential variations in absorption coefficients between starting materials and products, purified cyclodimerization product **B1a** was isolated and used as the primary external standard. Standard solutions of **B1a** were prepared in H<sub>2</sub>O at concentrations of 0.0625, 0.125, 0.25, 0.5, and 1.0 mM. For each analysis, 10  $\mu$ L of the solution was injected into the UPLC-MS system under the conditions specified in Method A. Considering that all cyclodimerization products have a 270nm characteristic absorption peak, MassLynx V4.2 software was used to integrate the peak area at 270nm for calibration curve calculation.

A high-precision calibration curve was established within the linear dynamic range of 0.0625 mM to 0.25 mM (3 points), where the UV detector exhibited an excellent linear response ( $R^2 = 0.9997$ ). Higher concentrations ( $\geq 0.5$  mM) were found to approach the detector's saturation limit and were excluded from the global linear regression to maintain the highest precision for low-to-medium concentration samples.

Tab S7. The LC-MS data for B1a at different concentrations

| Entry | Concentration of B1a | Peak area of B1a in 270 nm |
|-------|----------------------|----------------------------|
| 1     | 0.0625 mM            | 51427                      |
| 2     | 0.125 mM             | 100779                     |
| 3     | 0.25 mM              | 192600                     |
| 4     | 0.5 mM               | 301328                     |
| 5     | 1 mM                 | 553314                     |

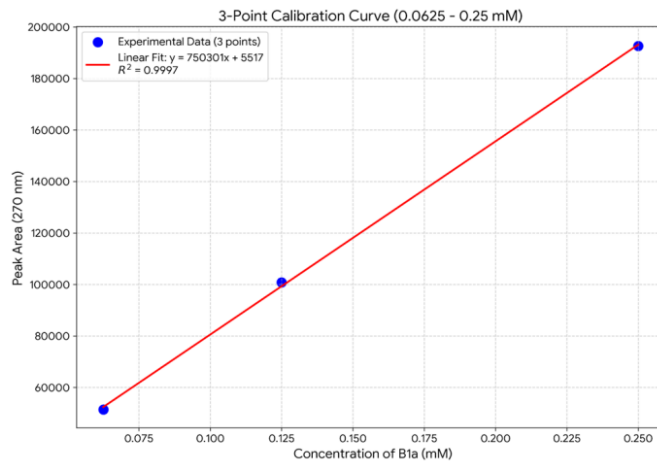

Fig S91. Calibration curve of purified B1a (0.0625 to 0.25 mM) at 270 nm ( $y = 750301x + 5517$ ,  $R^2 = 0.9997$ ).

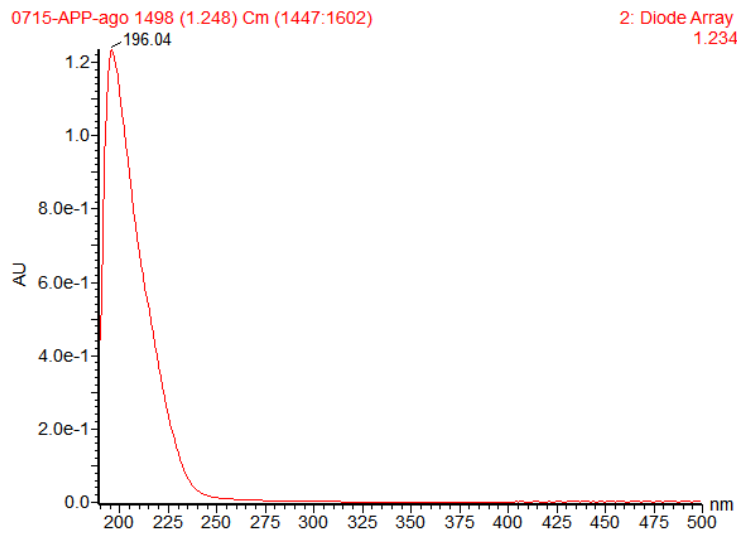

Fig S92. The UV characteristic absorption of M1-ss.

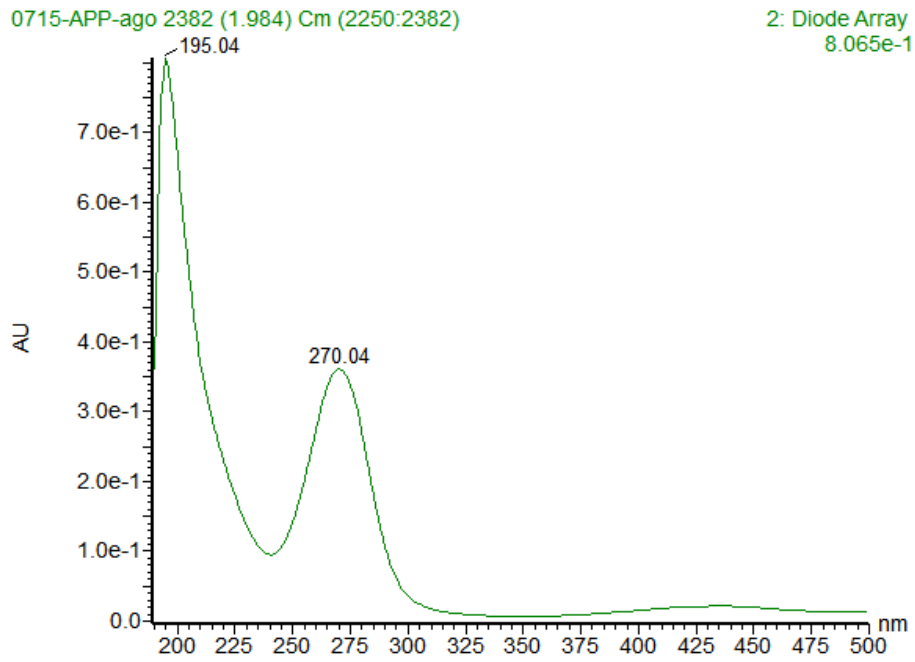

Fig S93. The UV characteristic absorption of B1a.

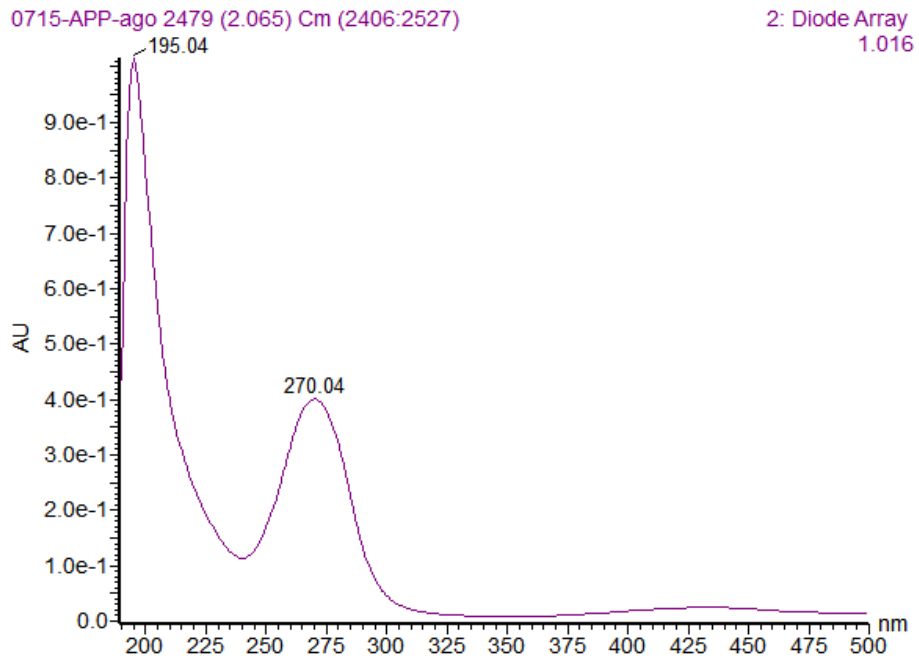

Fig S94. The UV characteristic absorption of B1b.

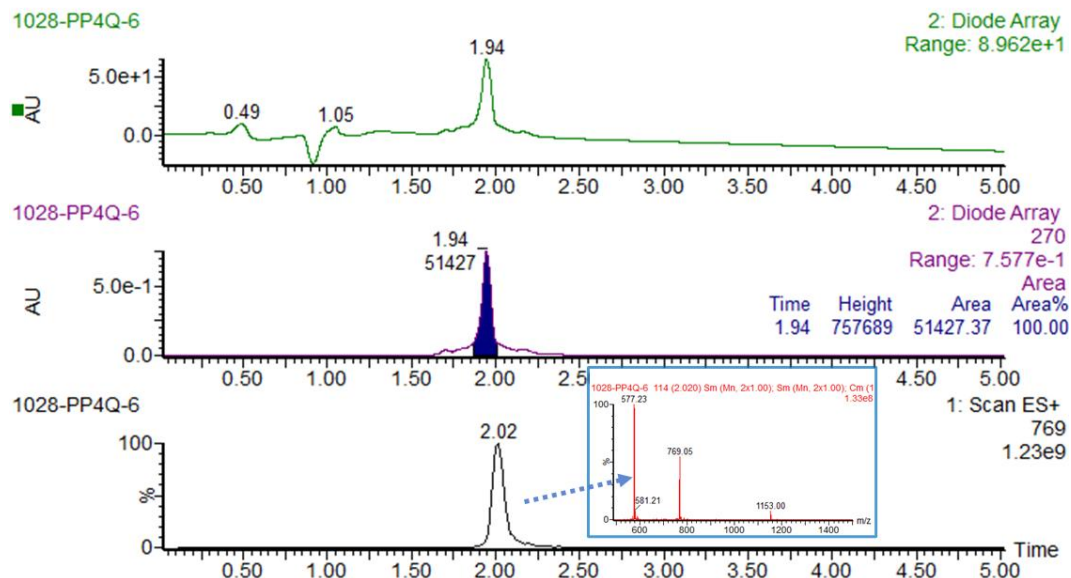

**Fig S95.** LC-MS for **B1a** (0.0625 mM) including TIC, UV curves (full-wavelength and extracted at 270 nm) and ESI-MS spectrum. Extract mass chromatograms from full scan data.

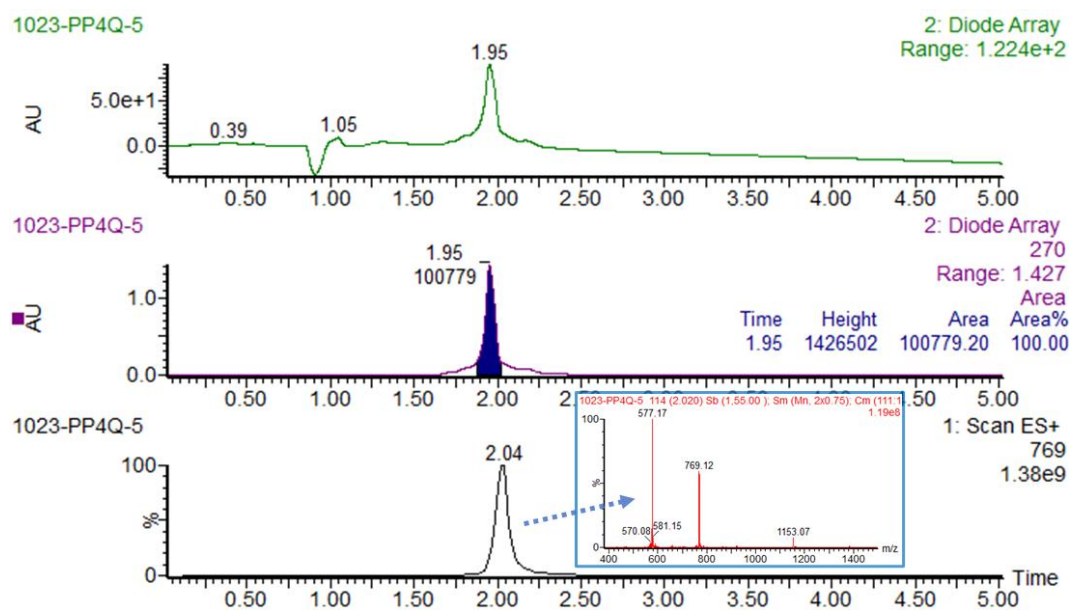

**Fig S96.** LC-MS for **B1a** (0.125 mM) including TIC, UV curves (full-wavelength and extracted at 270 nm) and ESI-MS spectrum. Extract mass chromatograms from full scan data.

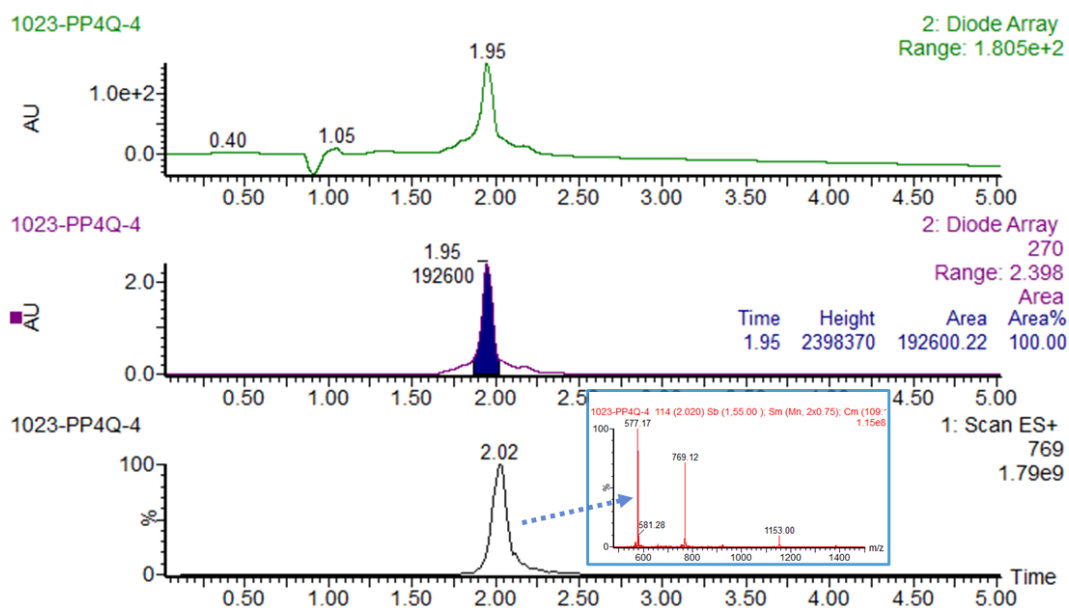

**Fig S97** LC-MS for **B1a** (0.25 mM) including TIC, UV curves (full-wavelength and extracted at 270 nm) and ESI-MS spectrum. Extract mass chromatograms from full scan data.

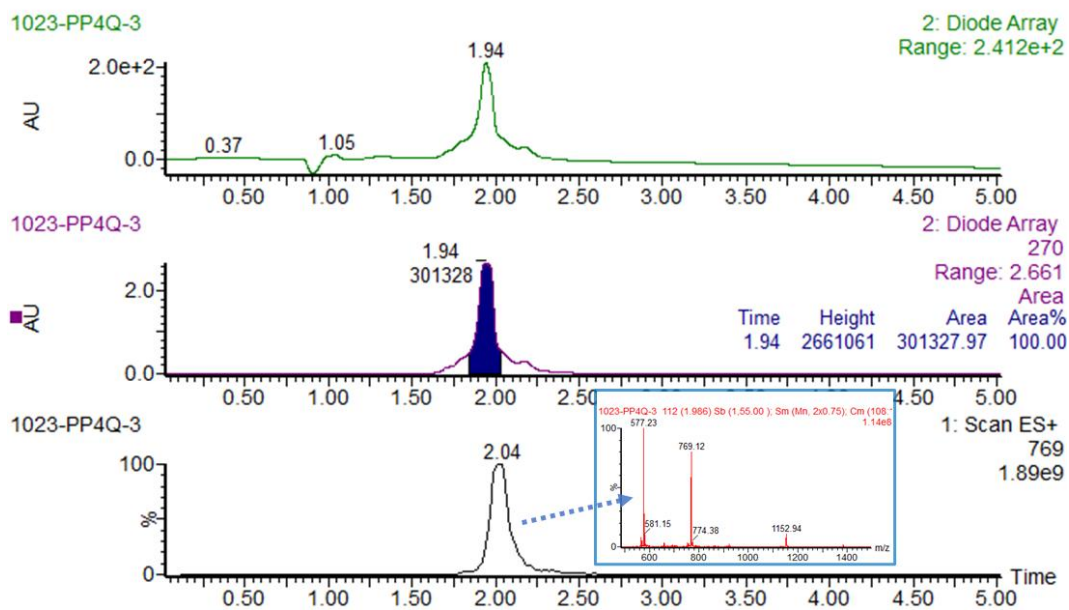

**Fig S98** LC-MS for **B1a** (0.5 mM) including TIC, UV curves (full-wavelength and extracted at 270 nm) and ESI-MS spectrum. Extract mass chromatograms from full scan data.

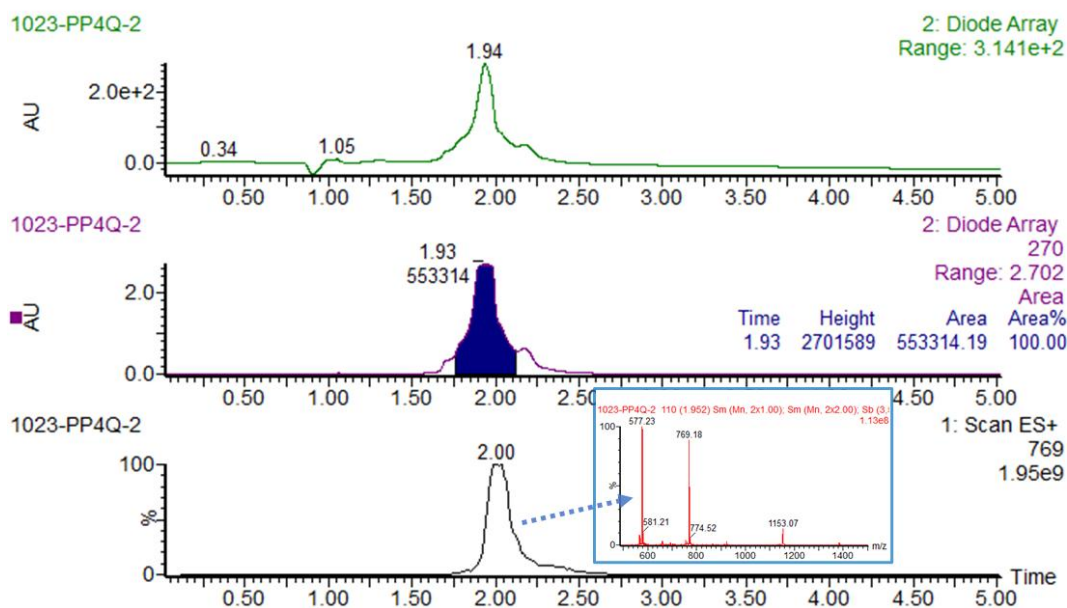

**Fig S99** LC-MS for **B1a** (1 mM) including TIC, UV curves (full-wavelength and extracted at 270 nm) and ESI-MS spectrum. Extract mass chromatograms from full scan data.

## (2) Calculation Strategies

To mitigate systematic errors arising from detector non-linearity at higher concentrations, a dual-strategy quantification approach was employed.

### **Strategy A: Linear Regression (for theoretical cyclodimerization product concentrations $\leq 0.25$ mM):**

For reaction conditions where the theoretical maximum cyclodimerization product concentration falls within the linear range (e.g., 0.125, 0.25, and 0.5 mM peptide screenings), the LC-MS yield was calculated using the following **Equation 1**:

$$\text{Yield (\%)} = \frac{(A_{\text{sample}} - 5517)/750301}{C_{\text{theoretical}}} \times 100\%$$

Where  $A_{\text{sample}}$  is the measured peak area at 270 nm, and  $C_{\text{theoretical}}$  is the theoretical maximum cyclodimerization product concentration (mM) based on the starting peptide.

### **Strategy B: Concentration-Matched Single-Point Calibration (for 1.0 mM peptide):**

For high-concentration screenings (1.0 mM peptide, theoretical dimer 0.5 mM), a concentration-matched standard (0.5 mM purified **B1a**) was used as the reference to compensate for detector saturation, **Equation 2**:

$$\text{Yield (\%)} = \frac{A_{\text{sample}}}{A_{\text{std\_at\_0.5\_mM}}} \times 100\%$$

Where  $A_{\text{std\_at\_0.5\_mM}} = 301328$  (experimentally determined peak area of the 0.5 mM standard).

## 4.2 Screening of reaction conditions

### Example procedure (Standard reaction conditions, Entry 1):

The dried peptide **L1** (1.0 equiv.) was dissolved in appropriate amount of PBS (20 mM, pH = 9.0) to reach a concentration of 0.56 mM. To this solution, 3,6-DCT (1.0 equiv.) dissolved in acetonitrile (1/9 of the volume of buffer) was added. The final concentrations in the reaction were 0.5 mM peptide, 0.5 mM 3,6-DCT and 10% acetonitrile, followed by thorough mixing. The reaction mixture was shaken at 25 °C and 800 rpm for 1 h on a thermostatic shaker.

Specifically, for Entry 15, the dried peptide **L1** (1.0 equiv.) was dissolved in an appropriate amount of PBS (20 mM, pH = 9.0) to reach a final concentration of 0.5 mM. Separately, 3,6-DCT (1.0 equiv.) was dissolved in an equal volume of  $\text{CHCl}_3$  and then combined with the peptide solution, followed by thorough mixing. The reaction mixture was shaken at 25 °C and 800 rpm for 1 h on a thermostatic shaker. For Entry 16, the reaction mixture under the standard conditions was supplemented with TCEP (10 equiv.).

After completion, 50  $\mu\text{L}$  of the reaction mixture was collected, and 10  $\mu\text{L}$  was injected into the UPLC-MS for analysis. The peak area of the cyclodimerization products at 270 nm was recorded. Determine the LC-MS yield using **Equation 1 or 2**. Detailed data are shown in **Table S8**.

**Tab S8. The LC-MS data for reaction conditions collected using Method A**

| Entry | Deviation from standard conditions | Peak area of B1a and B1b | Yield (%) <sup>[a]</sup> |
|-------|------------------------------------|--------------------------|--------------------------|
| 1     | None                               | 116206                   | 59.01 <sup>[b]</sup>     |
| 2     | PBS (pH 5)                         | 28379                    | 12.19 <sup>[b]</sup>     |
| 3     | PBS (pH 6)                         | 64604                    | 31.50 <sup>[b]</sup>     |
| 4     | PBS (pH 7)                         | 94525                    | 47.45 <sup>[b]</sup>     |
| 5     | PBS (pH 7.4)                       | 91930                    | 46.07 <sup>[b]</sup>     |
| 6     | PBS (pH 8)                         | 98365                    | 49.50 <sup>[b]</sup>     |
| 7     | 0.125 mM peptide                   | 27319                    | 46.50 <sup>[b]</sup>     |

|    |                              |        |                      |
|----|------------------------------|--------|----------------------|
| 8  | 0.25 mM peptide              | 46418  | 43.61 <sup>[b]</sup> |
| 9  | 1 mM peptide                 | 115877 | 38.46 <sup>[c]</sup> |
| 10 | 3,6-DCT (1.2 eq.)            | 103633 | 52.31 <sup>[b]</sup> |
| 11 | 3,6-DCT (2 eq.)              | 0      | 0                    |
| 12 | Mix 30 minutes               | 109181 | 55.26 <sup>[b]</sup> |
| 13 | Mix 2 hours                  | 110873 | 56.17 <sup>[b]</sup> |
| 14 | Mix 4 hours                  | 113608 | 57.62 <sup>[b]</sup> |
| 15 | 3,6-DCT (CHCl <sub>3</sub> ) | 118569 | 60.27 <sup>[b]</sup> |
| 16 | TCEP (10 eq.)                | 18994  | 7.18 <sup>[b]</sup>  |

<sup>[a]</sup>LC-MS yields represent the conversion yields determined by HPLC analysis. <sup>[b]</sup>Determined using

**Equation 1.** <sup>[c]</sup>Determined using **Equation 2.**

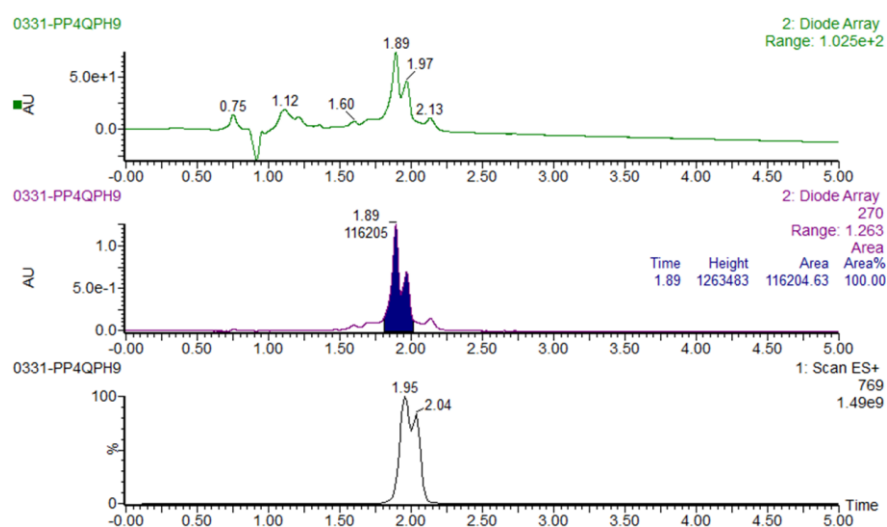

**Fig S100.** LC-MS of the reaction solution of entry 1 (standard conditions) including TIC and UV curves (full-wavelength and extracted at 270 nm).

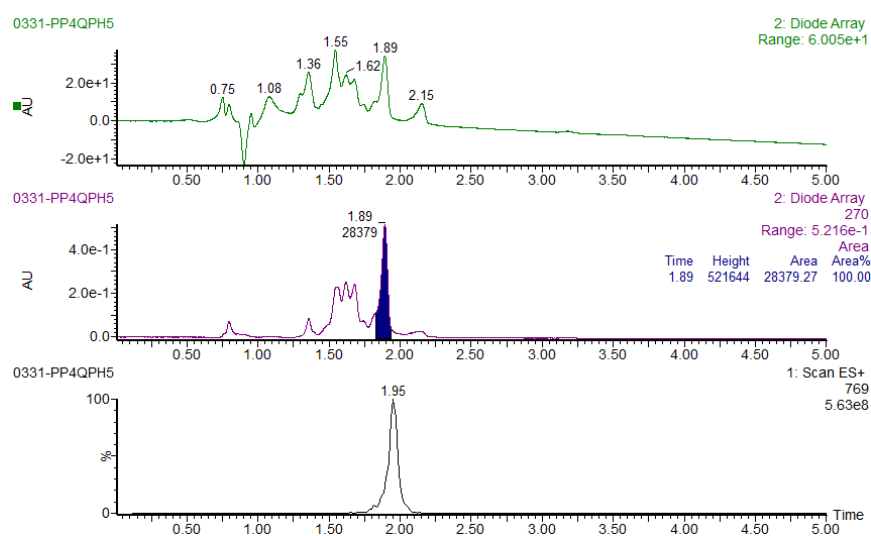

**Fig S101.** LC-MS of the reaction solution of entry 2 including TIC and UV curves (full-wavelength and extracted at 270 nm).

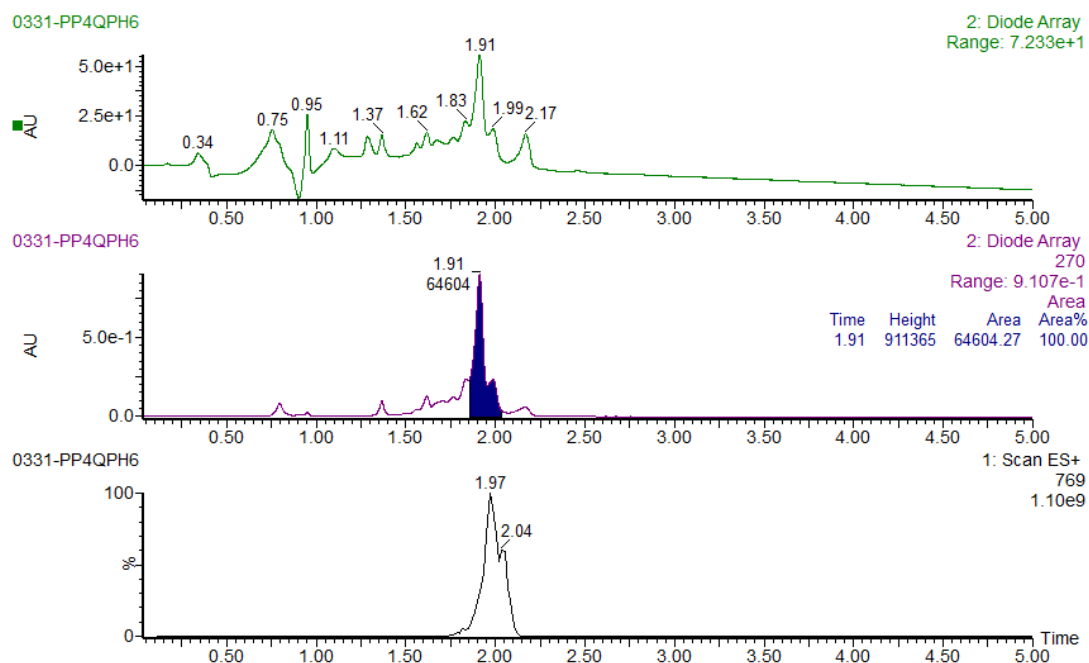

**Fig S102.** LC-MS of the reaction solution of entry 3 including TIC and UV curves (full-wavelength and extracted at 270 nm).

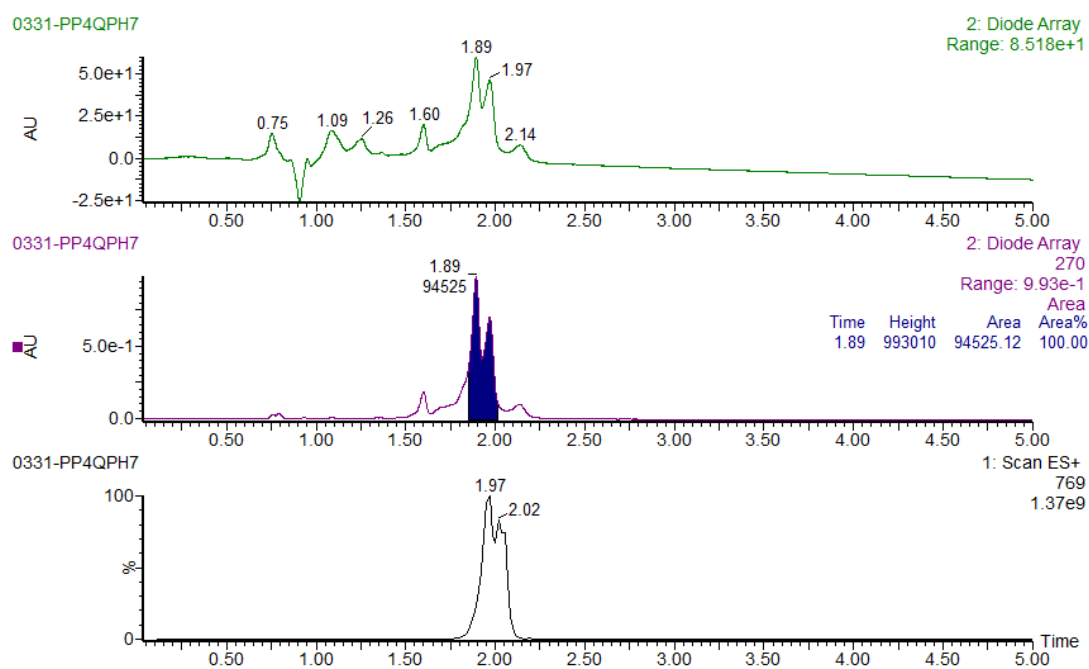

**Fig S103.** LC-MS of the reaction solution of entry 4 including TIC and UV curves (full-wavelength and extracted at 270 nm).

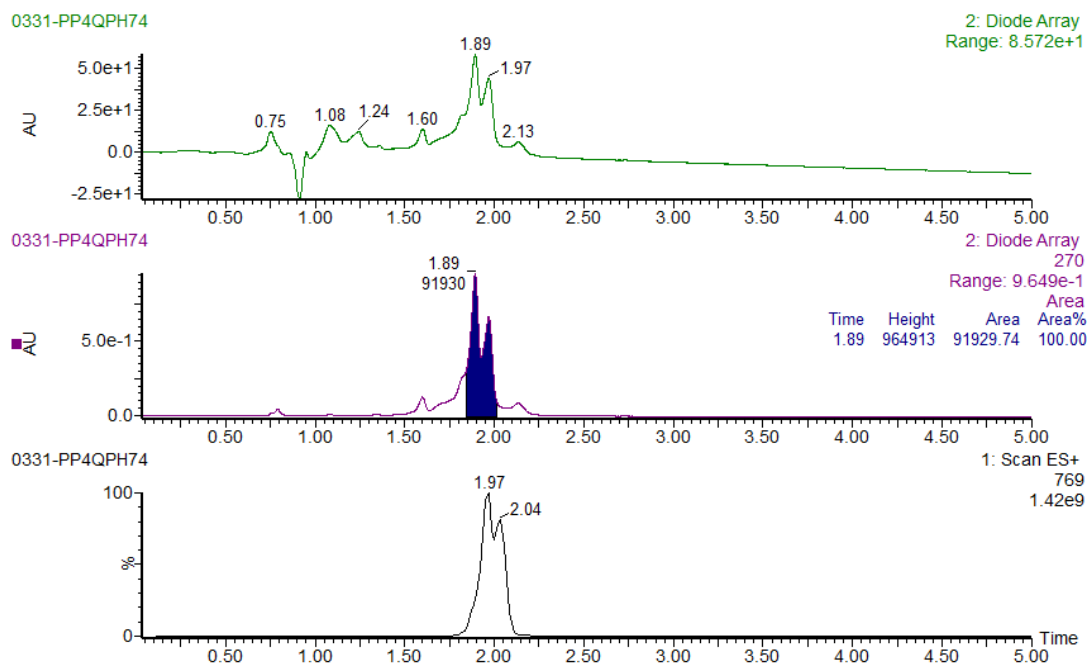

**Fig S104.** LC-MS of the reaction solution of entry 5 including TIC and UV curves (full-wavelength and extracted at 270 nm).

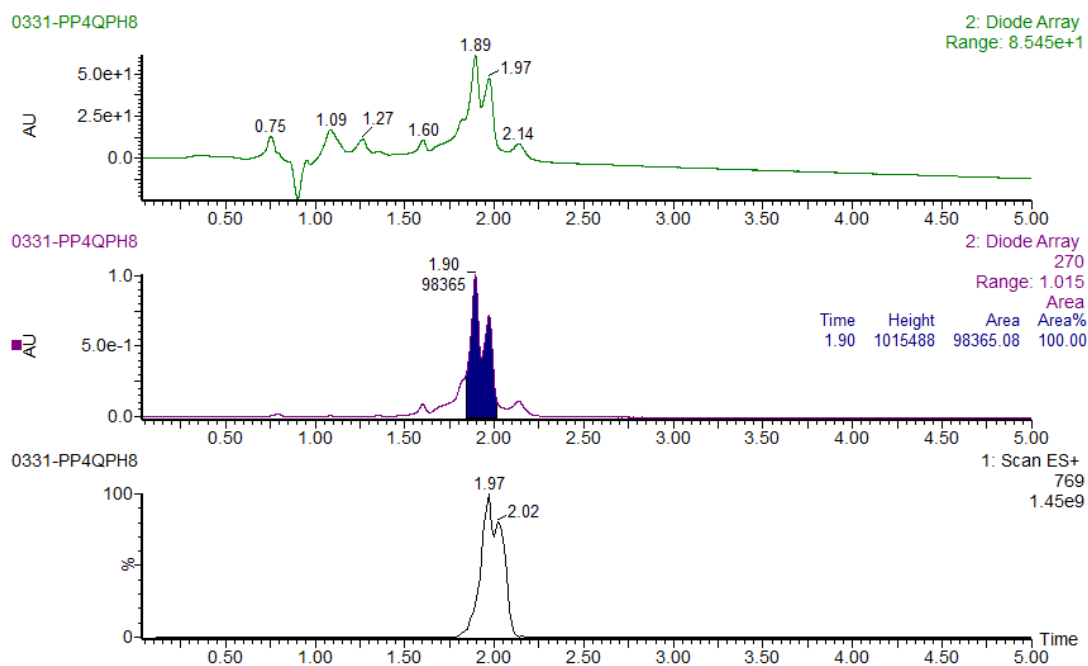

**Fig S105.** LC-MS of the reaction solution of entry 6 including TIC and UV curves (full-wavelength and extracted at 270 nm).

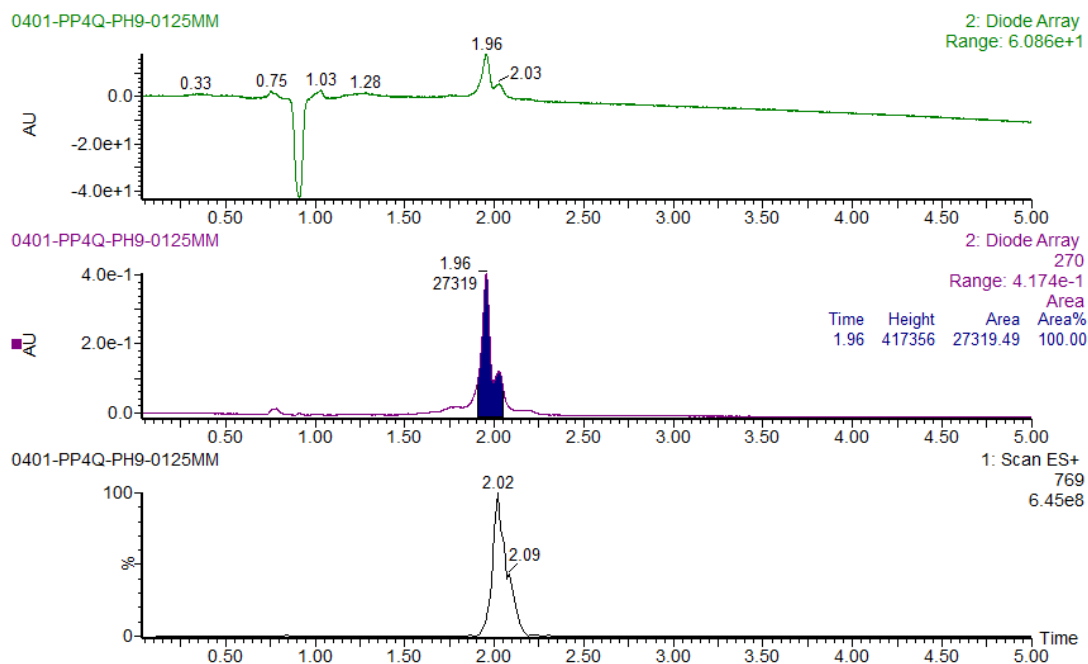

**Fig S106.** LC-MS of the reaction solution of entry 7 including TIC and UV curves (full-wavelength and extracted at 270 nm).

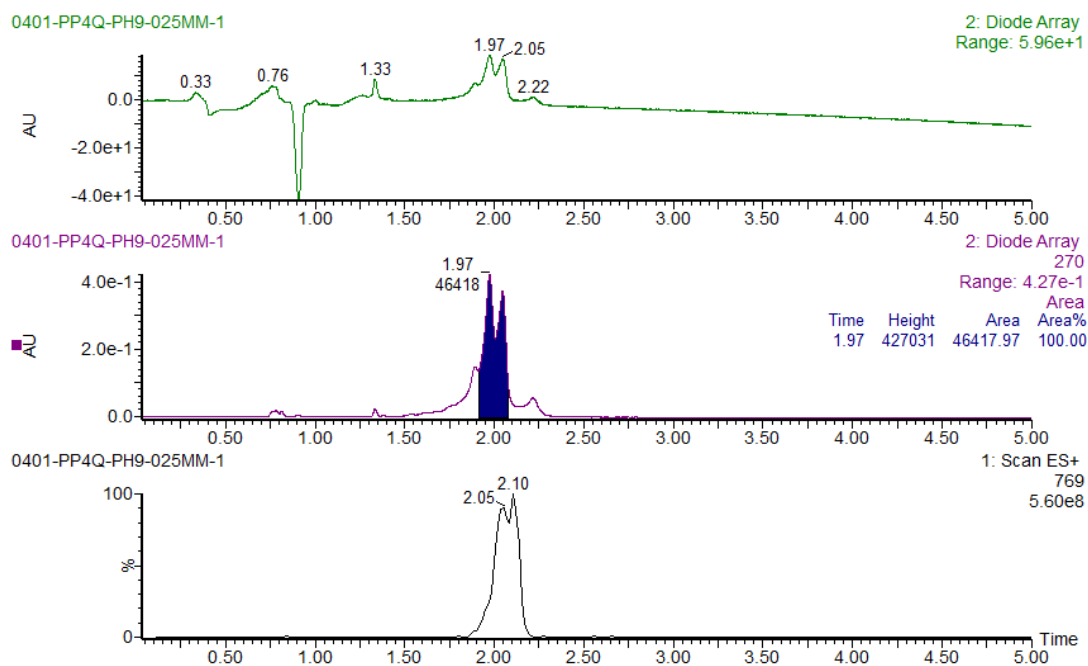

**Fig S107.** LC-MS of the reaction solution of entry 8 including TIC and UV curves (full-wavelength and extracted at 270 nm).

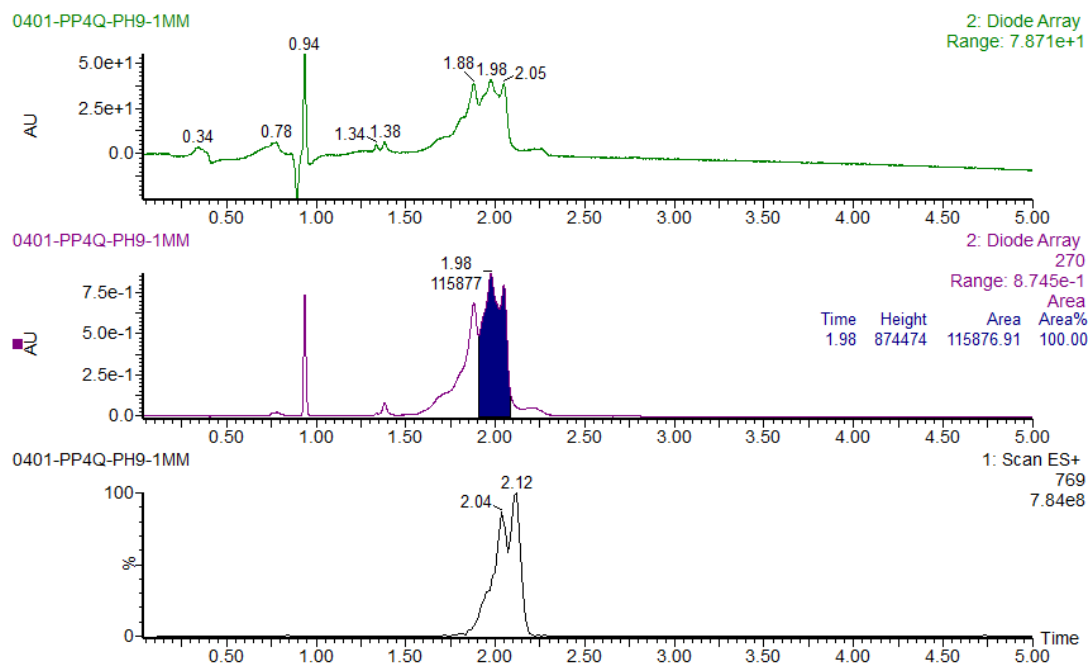

**Fig S108.** LC-MS of the reaction solution of entry 9 including TIC and UV curves (full-wavelength and extracted at 270 nm).

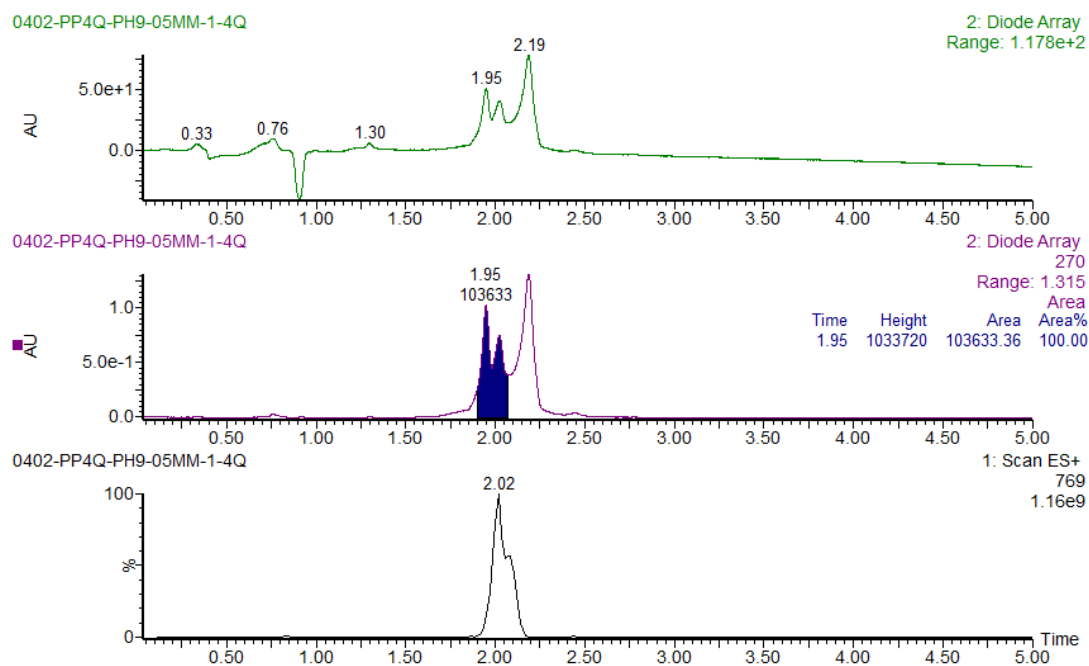

**Fig S109.** LC-MS of the reaction solution of entry 10 including TIC and UV curves (full-wavelength and extracted at 270 nm).

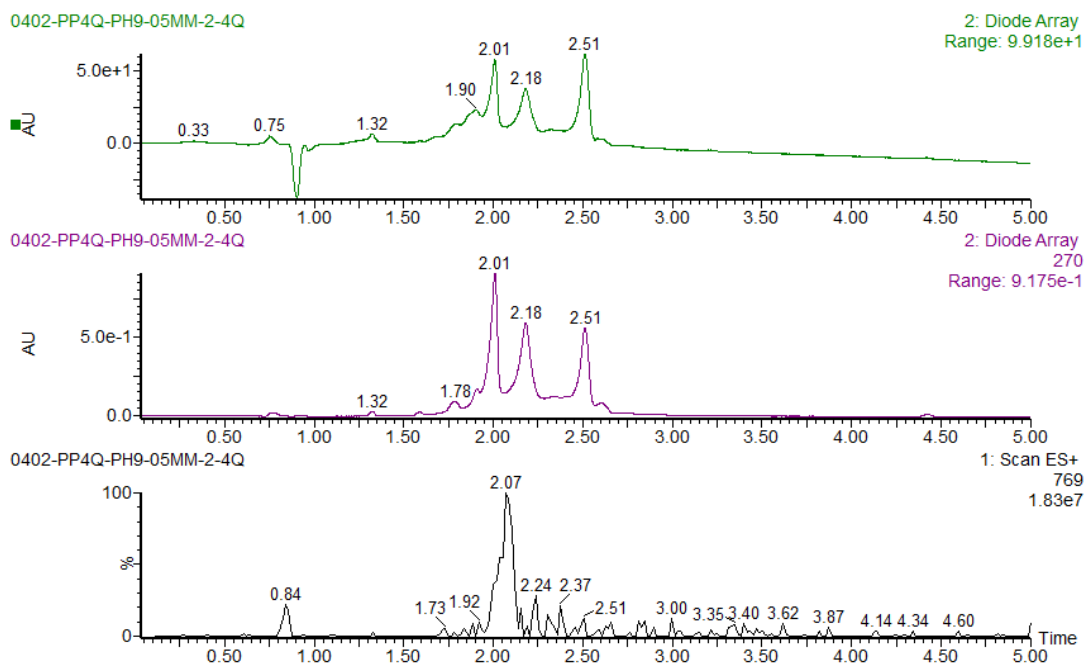

**Fig S110.** LC-MS of the reaction solution of entry 11 including TIC and UV curves (full-wavelength and extracted at 270 nm).

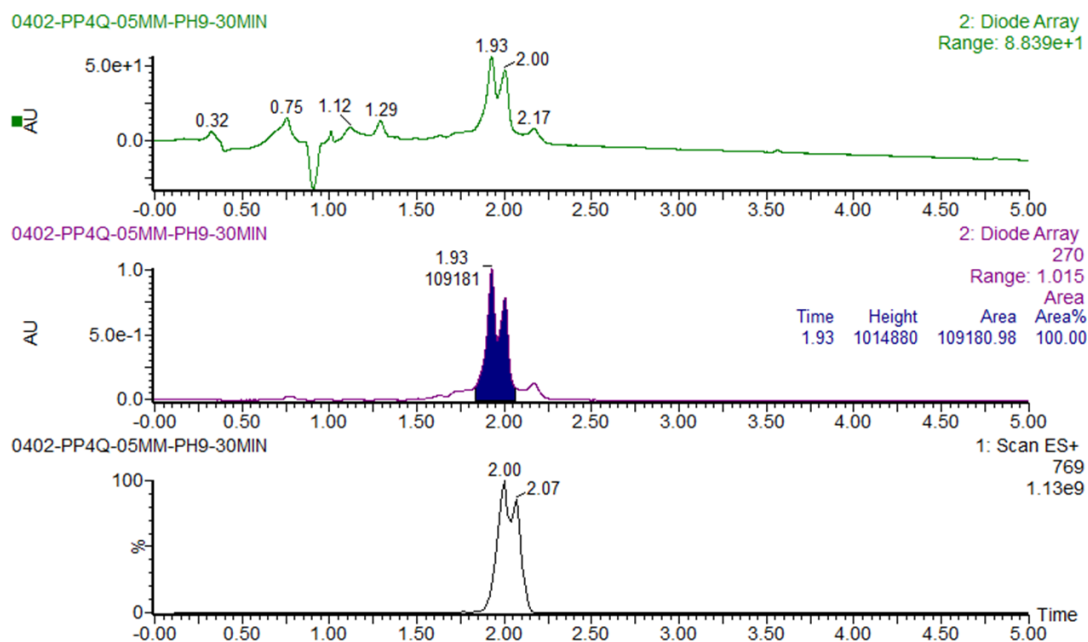

**Fig S111.** LC-MS of the reaction solution of entry 12 including TIC and UV curves (full-wavelength and extracted at 270 nm).

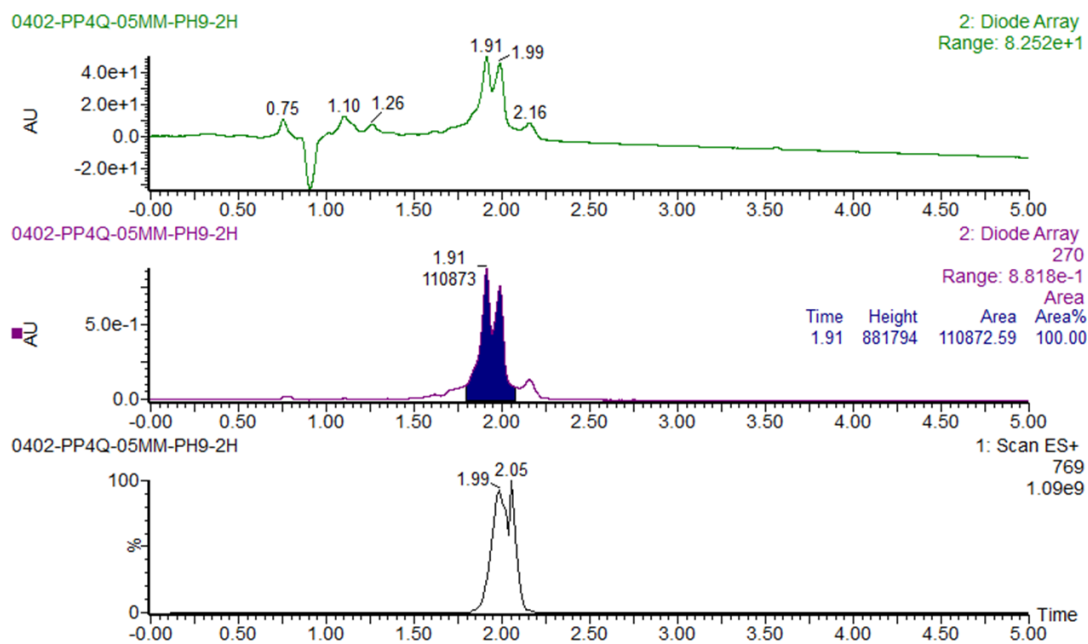

**Fig S112.** LC-MS of the reaction solution of entry 13 including TIC and UV curves (full-wavelength and extracted at 270 nm).

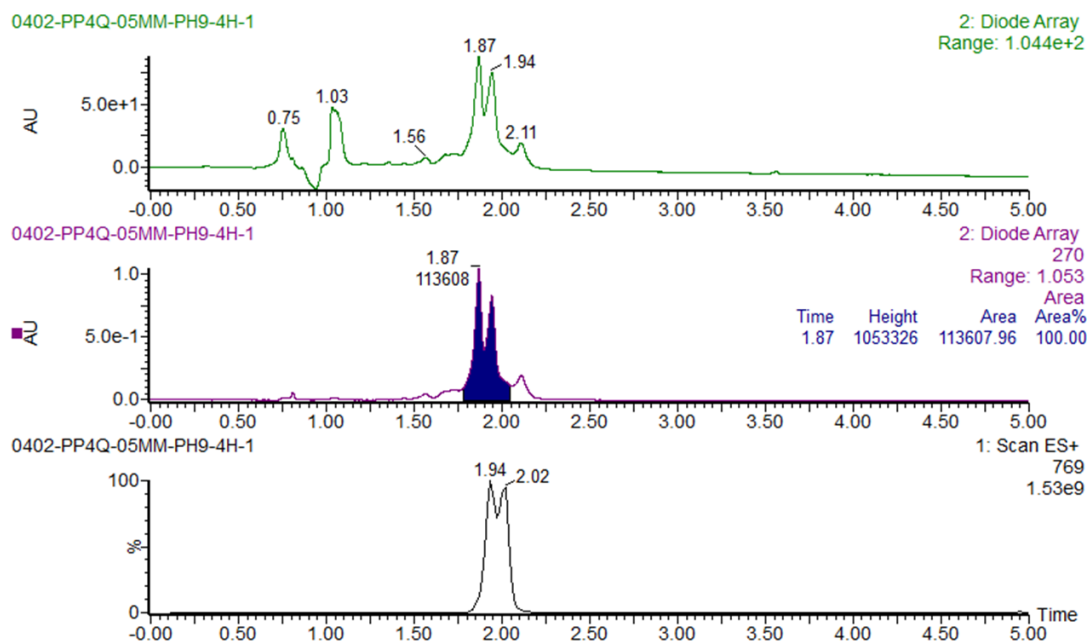

**Fig S113.** LC-MS of the reaction solution of entry 14 including TIC and UV curves (full-wavelength and extracted at 270 nm).

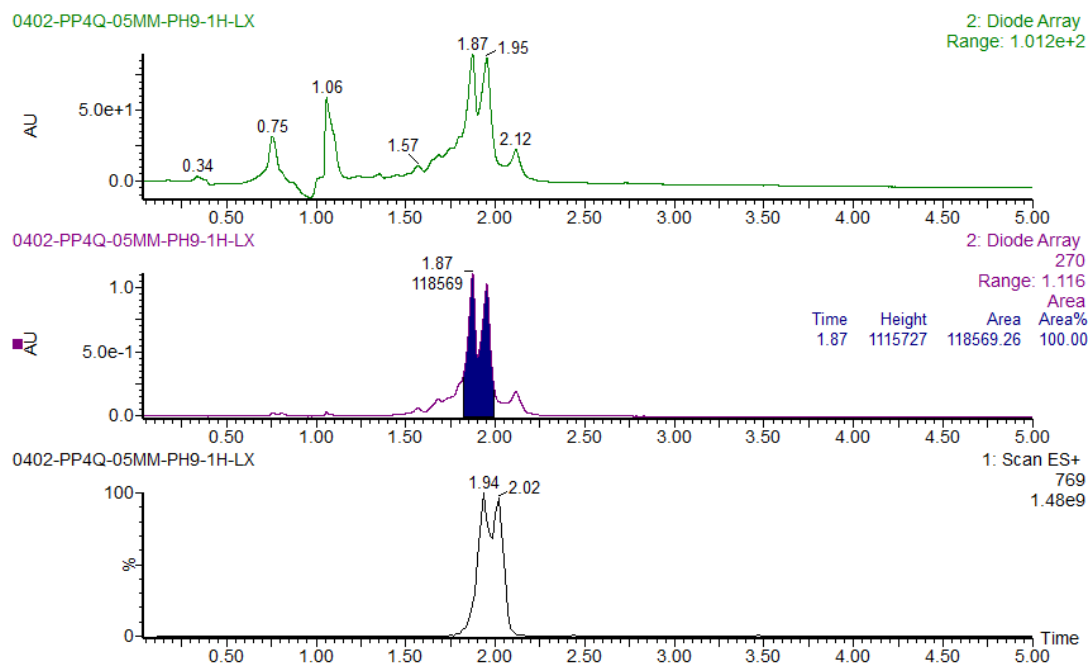

**Fig S114.** LC-MS of the reaction solution of entry 15 including TIC and UV curves (full-wavelength and extracted at 270 nm).

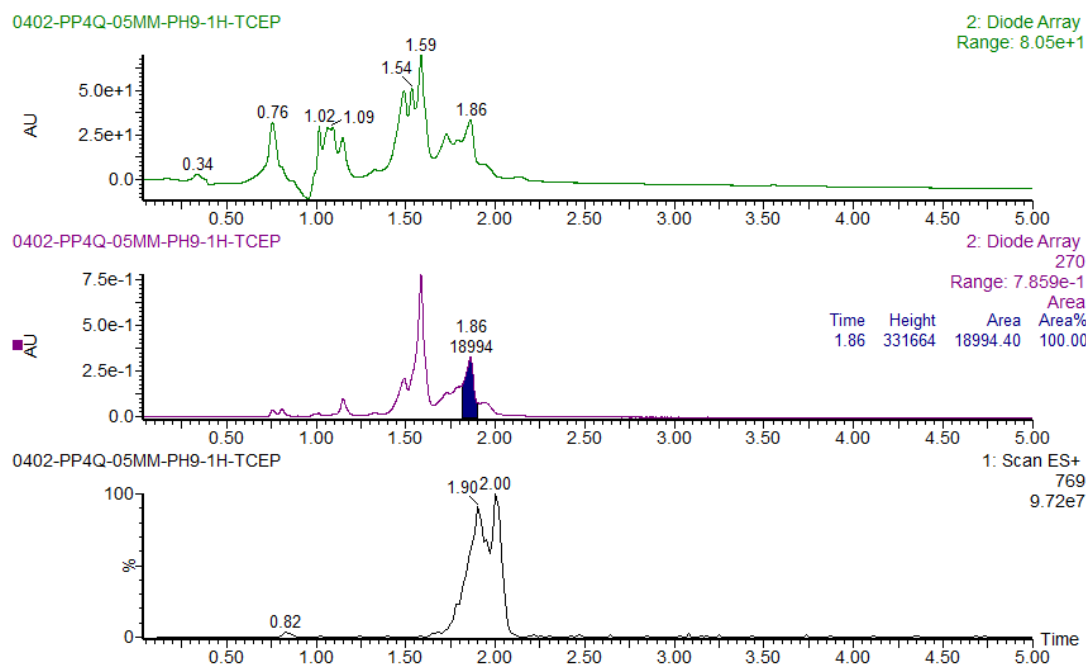

**Fig S115.** LC-MS of the reaction solution of entry 16 including TIC and UV curves (full-wavelength and extracted at 270 nm).

## 5. Reaction mechanism investigation and structure confirmation

### 5.1 Control experiments

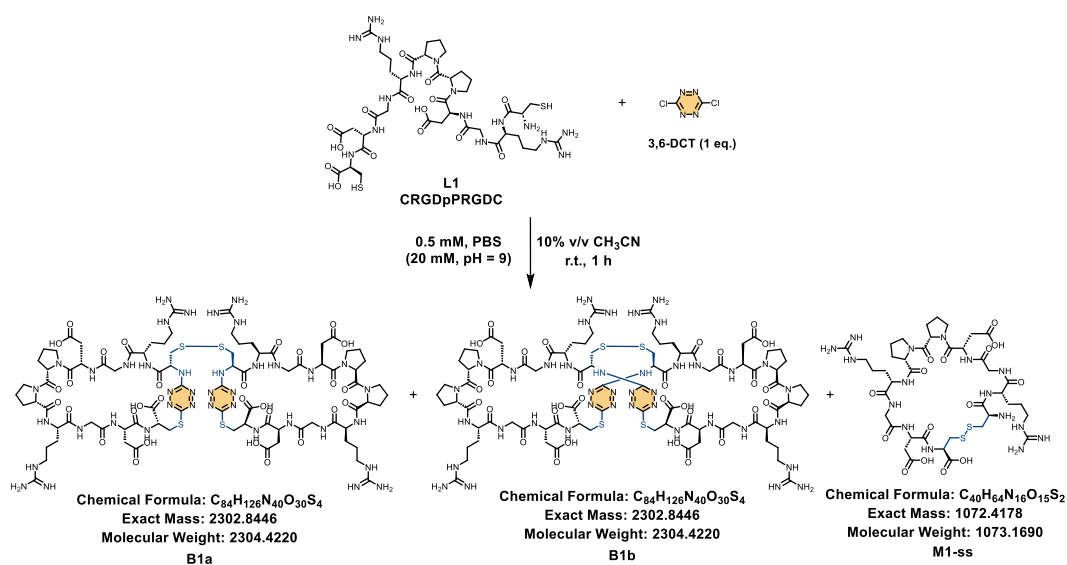

The dried peptide **L1** (1.0 equiv.) was dissolved in appropriate amount of PBS (20 mM, pH = 9.0) to reach a concentration of 0.56 mM. To this solution, 3,6-DCT (1.0 equiv.) dissolved in acetonitrile (1/9 of the volume of buffer) was added. The final concentrations in the reaction were 0.5 mM peptide, 0.5 mM 3,6-DCT and 10% acetonitrile, followed by thorough mixing. The reaction mixture was shaken at 25 °C and 800 rpm for 1 h on a thermostatic shaker.

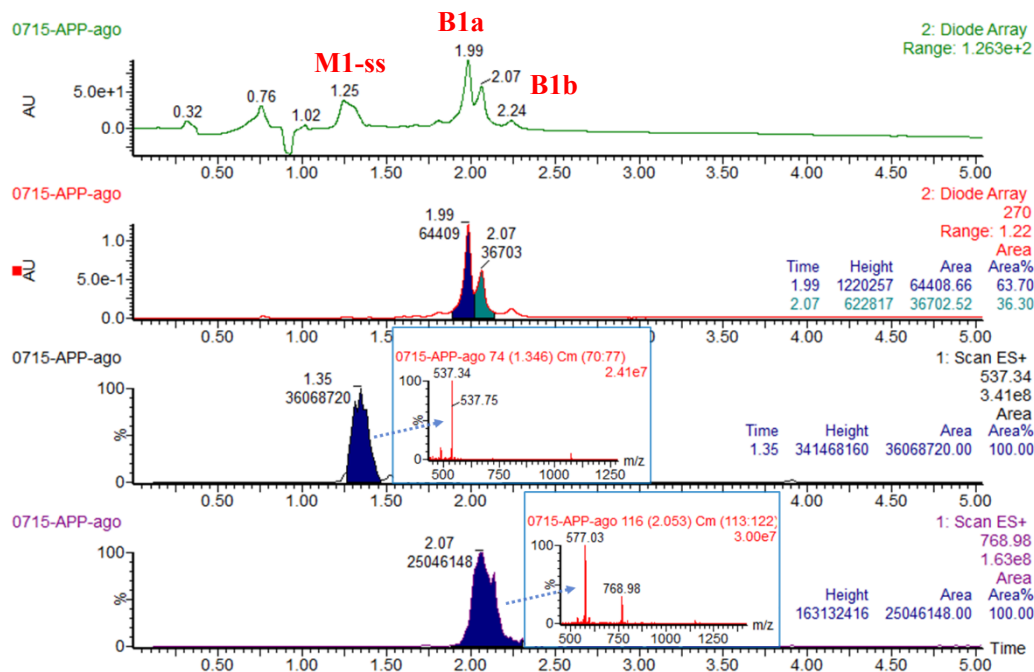

**Fig S116.** UPLC-MS chromatogram of **B1a** and 3,6-DCT reaction mixture including TIC, UV curves (full-wavelength and extracted at 270 nm) and ESI-MS spectrum. Extract mass chromatograms from full scan data.

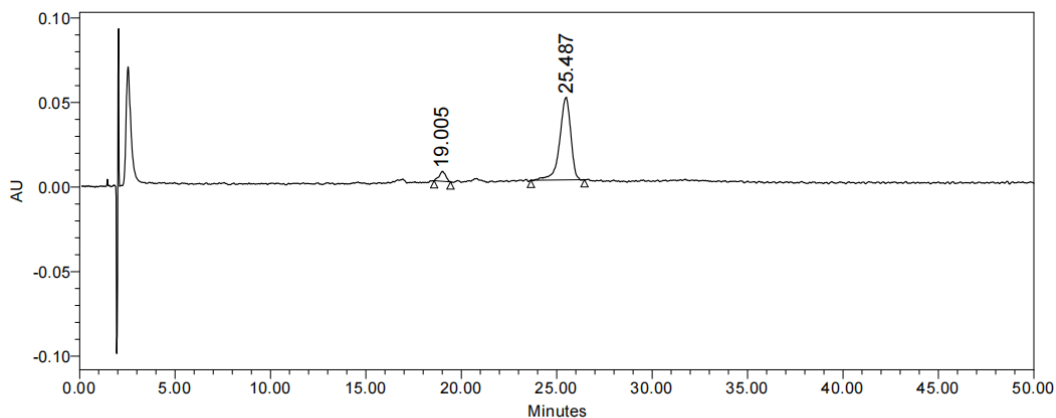

Channel: 2998 Ch1 220nm@4.8nm; Processed Channel: 2998 Ch1 220nm@4.8nm; Result Id: 39149;  
Processing Method: PP4QA

Processed Channel Descr.: 2998 Ch1 220nm@4.8nm

|   | Processed Channel Descr. | RT     | Area    | % Area | Height |
|---|--------------------------|--------|---------|--------|--------|
| 1 | 2998 Ch1 220nm@4.8nm     | 19.005 | 140872  | 6.69   | 5850   |
| 2 | 2998 Ch1 220nm@4.8nm     | 25.487 | 1964284 | 93.31  | 48689  |

**Fig S117.** HPLC-UV chromatogram at 220 nm of **B1a**. Analytical HPLC using Method E, RT = 25.487 min, the HPLC purity is 93%.

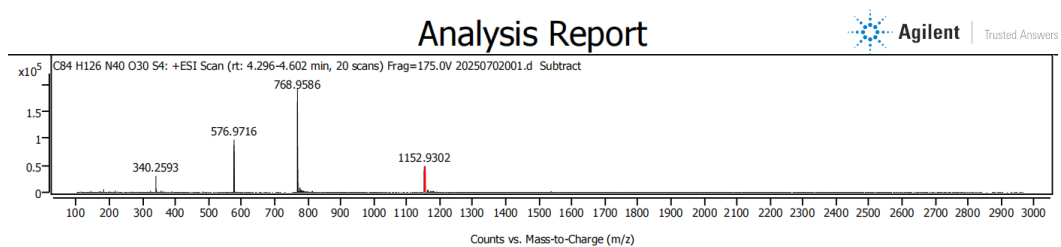

Spectrum Identification Table

| Best ID Source | Name | Formula                                                                         | Species              | m/z       | Diff (ppm) | CAS | Score | Score (Lib) | Score (DB) | Score (MFG) | Lib/DB |
|----------------|------|---------------------------------------------------------------------------------|----------------------|-----------|------------|-----|-------|-------------|------------|-------------|--------|
| Yes            | MFG  | C <sub>84</sub> H <sub>126</sub> N <sub>40</sub> O <sub>30</sub> S <sub>4</sub> | (M+2H) <sup>2+</sup> | 1152.4291 | -0.52      |     | 99.89 |             |            | 99.89       |        |

**Fig S118.** Q-TOF-HRMS spectrum of **B1a**. HRMS (ES<sup>+</sup>) m/z: [M+2H]<sup>2+</sup> calcd for C<sub>84</sub>H<sub>126</sub>N<sub>40</sub>O<sub>30</sub>S<sub>4</sub> 1152.4223, found 1152.4291.

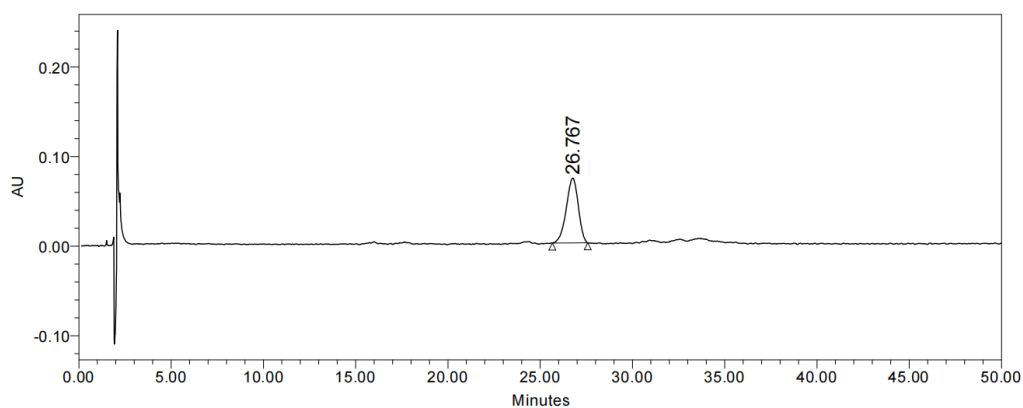

Channel: 2998 Ch1 220nm@4.8nm; Processed Channel: 2998 Ch1 220nm@4.8nm; Result Id: 39151;  
Processing Method: PP4QB

Processed Channel Descr.: 2998 Ch1 220nm@4.8nm

|   | Processed Channel Descr. | RT     | Area    | % Area | Height |
|---|--------------------------|--------|---------|--------|--------|
| 1 | 2998 Ch1 220nm@4.8nm     | 26.767 | 3253882 | 100.00 | 72318  |



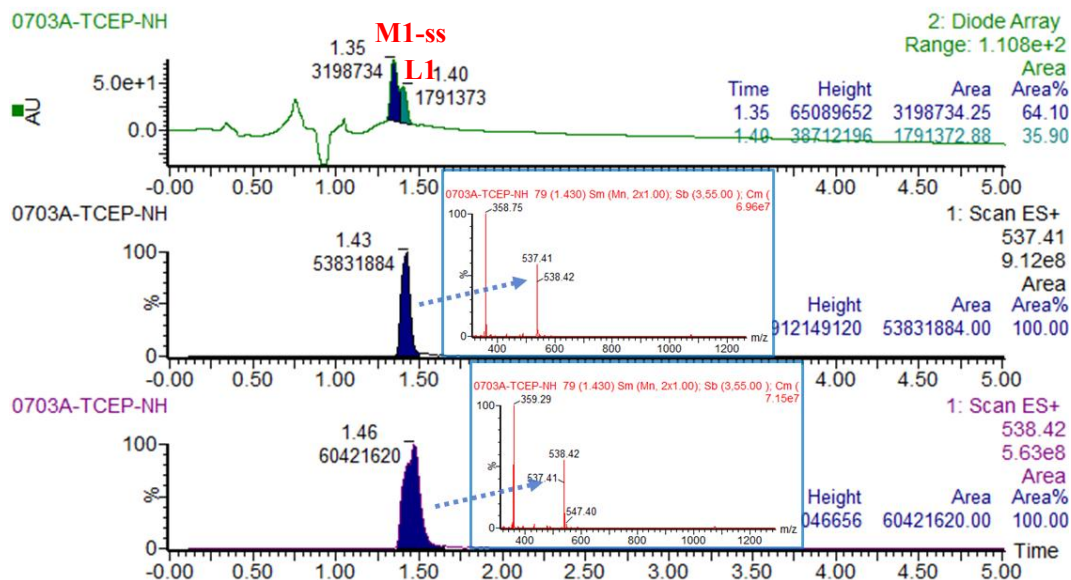

**Fig S122.** UPLC-MS chromatogram of **L1** without 3,6-DCT reaction mixture including TIC, UV curve (full-wavelength) and ESI-MS spectrum. Extract mass chromatograms from full scan data.

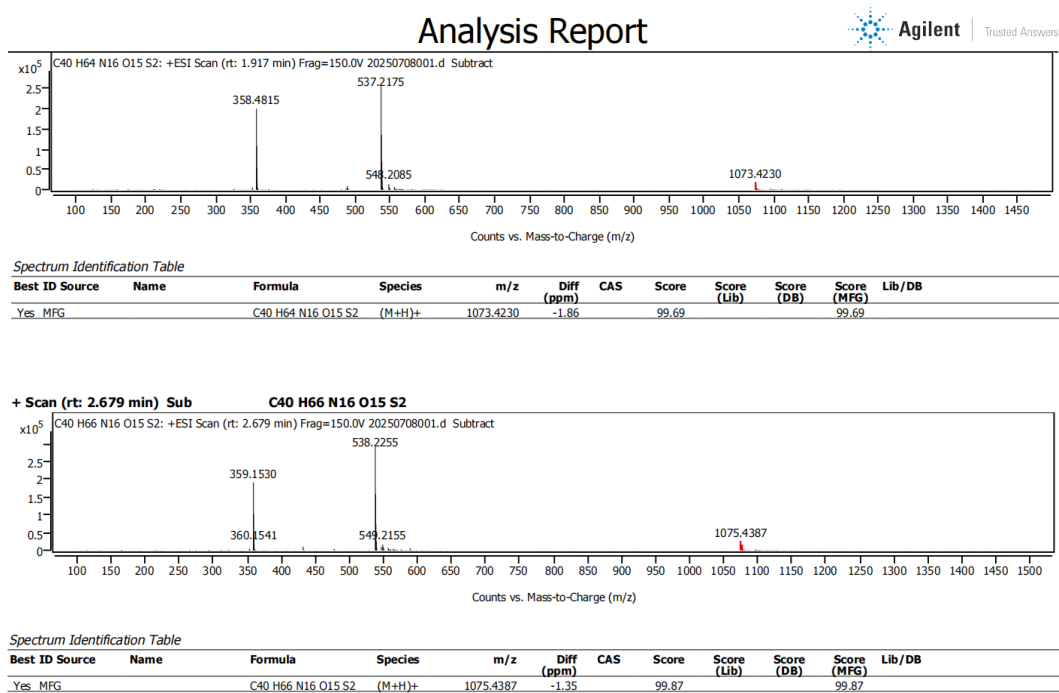

**Fig S123.** Q-TOF-HRMS spectrum of **L1** without 3,6-DCT reaction mixture. HRMS (ES<sup>+</sup>) m/z: [M+H]<sup>+</sup> calcd for C<sub>40</sub>H<sub>64</sub>N<sub>16</sub>O<sub>15</sub>S<sub>2</sub> 1073.4178, found 1073.4230. HRMS (ES<sup>+</sup>) m/z: [M+H]<sup>+</sup> calcd for C<sub>40</sub>H<sub>66</sub>N<sub>16</sub>O<sub>15</sub>S<sub>2</sub> 1075.4335, found 1075.4378.

### Control experiments ii:

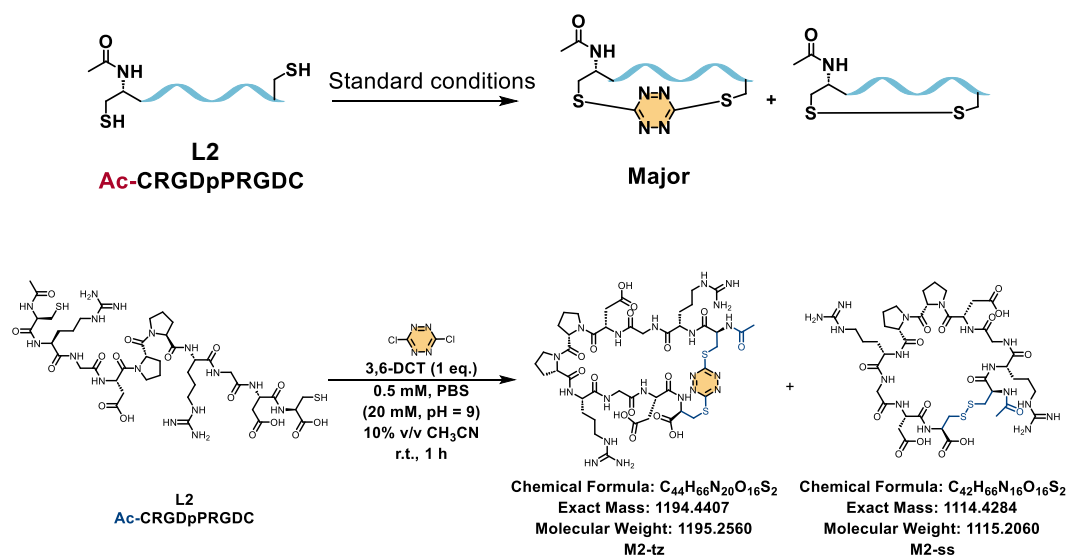

The dried peptide L2 (1.0 equiv.) was dissolved in appropriate amount of PBS (20 mM, pH = 9.0) to reach a concentration of 0.56 mM. To this solution, 3,6-DCT (1.0 equiv.) dissolved in acetonitrile (1/9 of the volume of buffer) was added. The final concentrations in the reaction were 0.5 mM peptide, 0.5 mM 3,6-DCT and 10% acetonitrile, followed by thorough mixing. The reaction mixture was shaken at 25 °C and 800 rpm for 1 h on a thermostatic shaker.

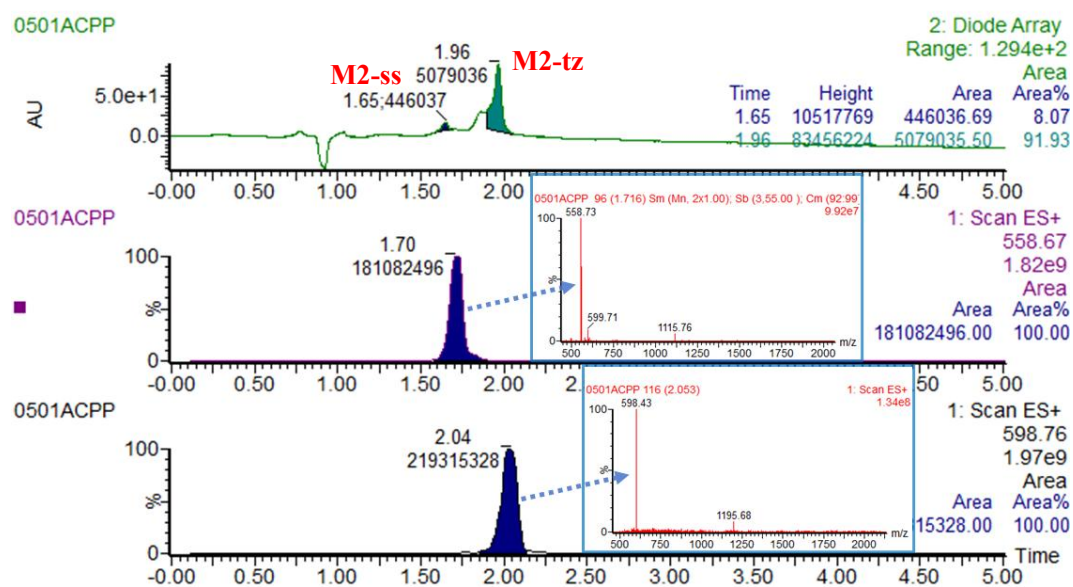

**Fig S124.** UPLC-MS chromatogram of L2 and 3,6-DCT reaction mixture including TIC, UV curve (full-wavelength) and ESI-MS spectrum. Extract mass chromatograms from full scan data.

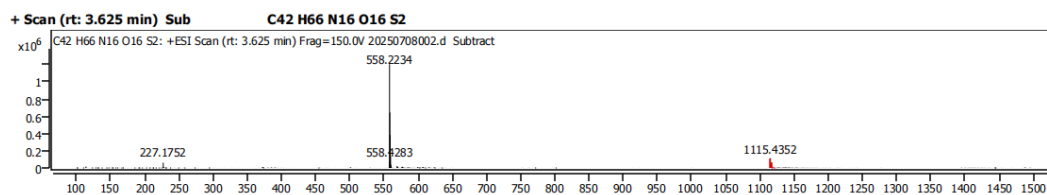

*Spectrum Identification Table*

| Best ID Source | Name | Formula            | Species            | m/z       | Diff (ppm) | CAS | Score | Score (Lib) | Score (DB) | Score (MFG) | Lib/DB |
|----------------|------|--------------------|--------------------|-----------|------------|-----|-------|-------------|------------|-------------|--------|
| Yes_MFG        |      | C42 H66 N16 O16 S2 | (M+H) <sup>+</sup> | 1115.4352 | -0.67      |     | 99.93 |             |            | 99.93       |        |

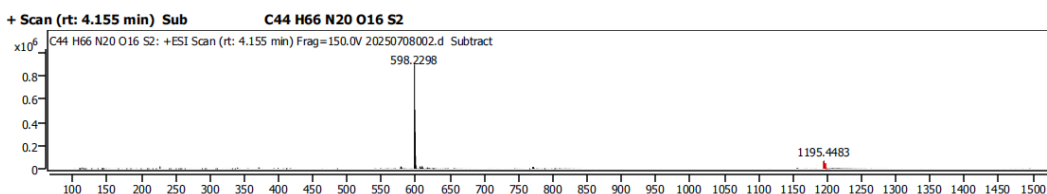

*Spectrum Identification Table*

| Best ID Source | Name | Formula            | Species            | m/z       | Diff (ppm) | CAS | Score | Score (Lib) | Score (DB) | Score (MFG) | Lib/DB |
|----------------|------|--------------------|--------------------|-----------|------------|-----|-------|-------------|------------|-------------|--------|
| Yes_MFG        |      | C44 H66 N20 O16 S2 | (M+H) <sup>+</sup> | 1195.4483 | -0.41      |     | 99.39 |             |            | 99.39       |        |

**Fig S125.** Q-TOF-HRMS spectrum of **L2** and 3,6-DCT reaction mixture. HRMS (ES<sup>+</sup>) m/z: [M+H]<sup>+</sup> calcd for C<sub>42</sub>H<sub>66</sub>N<sub>16</sub>O<sub>16</sub>S<sub>2</sub> 1115.4284, found 1115.4352. HRMS (ES<sup>+</sup>) m/z: [M+H]<sup>+</sup> calcd for C<sub>44</sub>H<sub>66</sub>N<sub>20</sub>O<sub>16</sub>S<sub>2</sub> 1195.4407, found 1195.4483.

### Control experiments iii and iv:

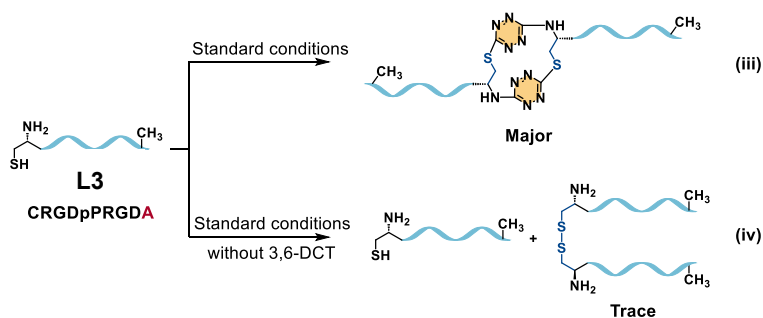

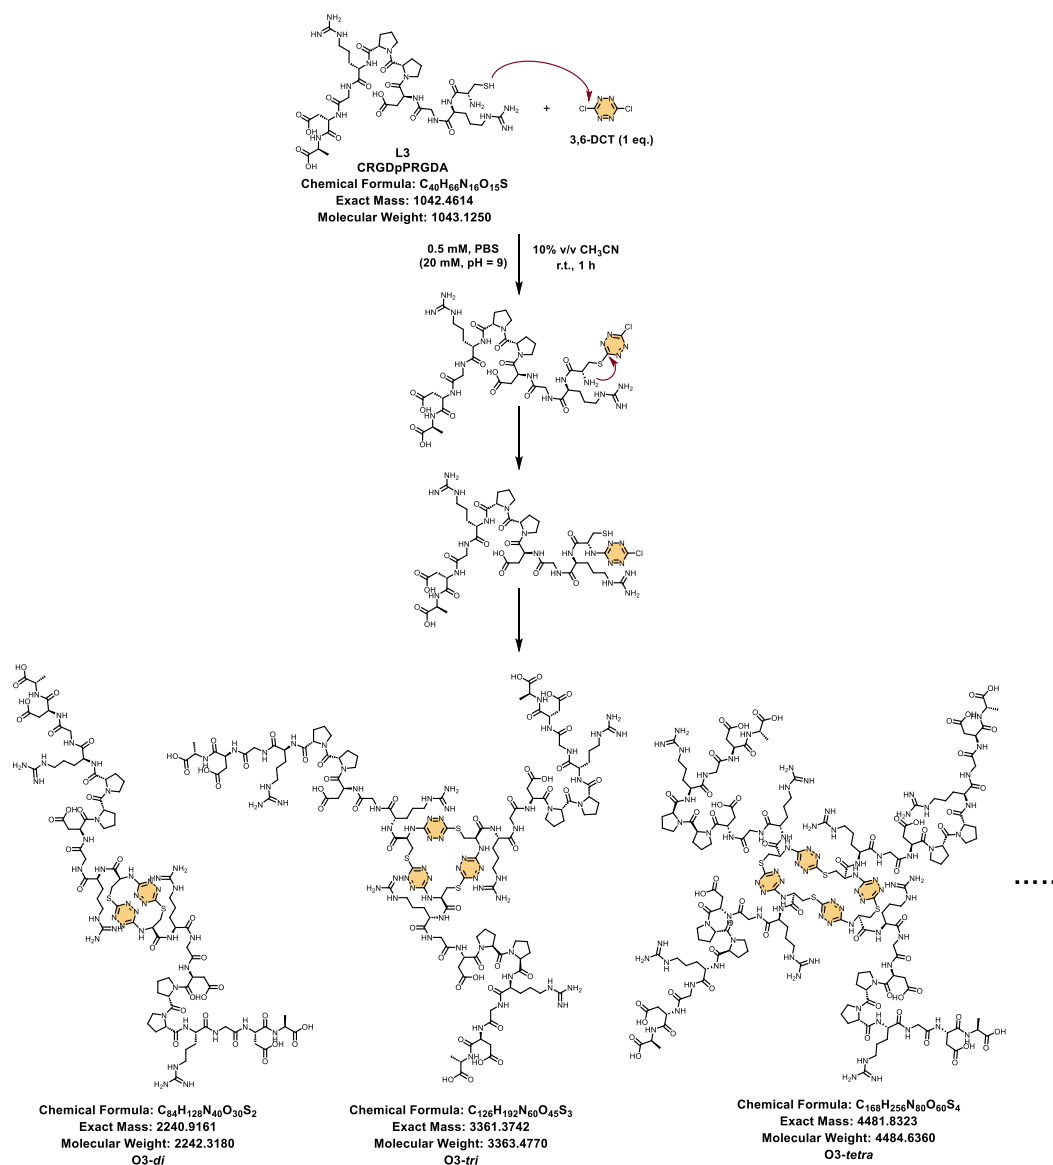

The dried peptide **L3** (1.0 equiv.) was dissolved in appropriate amount of PBS (20 mM, pH = 9.0) to reach a concentration of 0.56 mM. To this solution, 3,6-DCT (1.0 equiv.) dissolved in acetonitrile (1/9 of the volume of buffer) was added. The final concentrations in the reaction were 0.5 mM peptide, 0.5 mM 3,6-DCT and 10% acetonitrile, followed by thorough mixing. The reaction mixture was shaken at 25 °C and 800 rpm for 1 h on a thermostatic shaker.

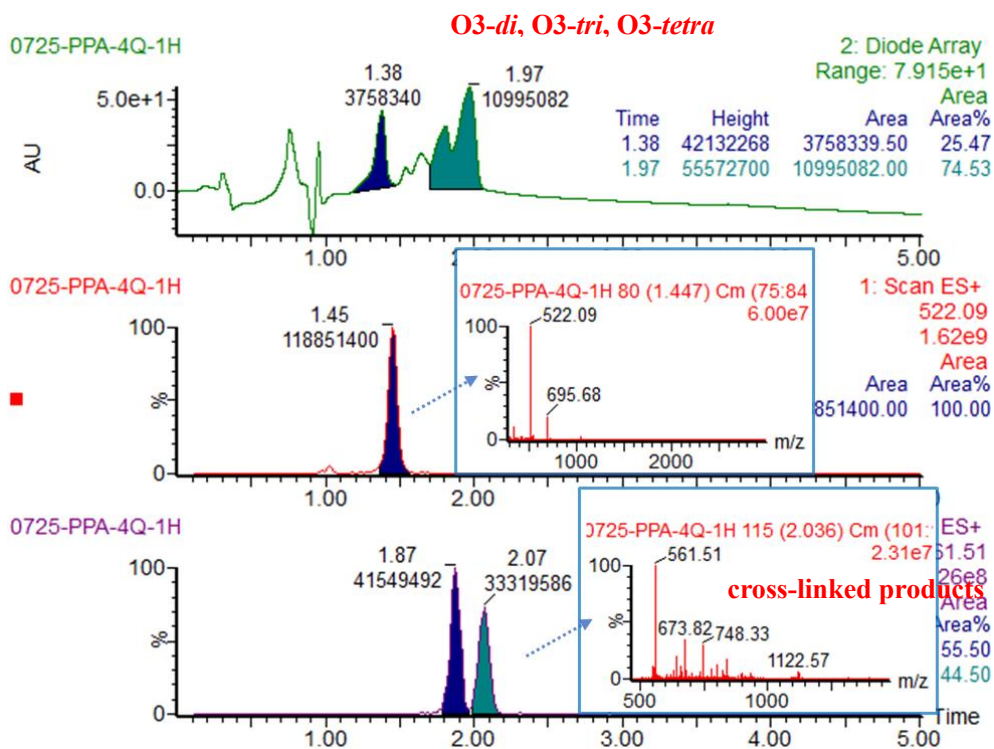

**Fig S126.** UPLC-MS chromatogram of L3 and 3,6-DCT reaction mixture including TIC, UV curve (full-wavelength) and ESI-MS spectrum. Extract mass chromatograms from full scan data.

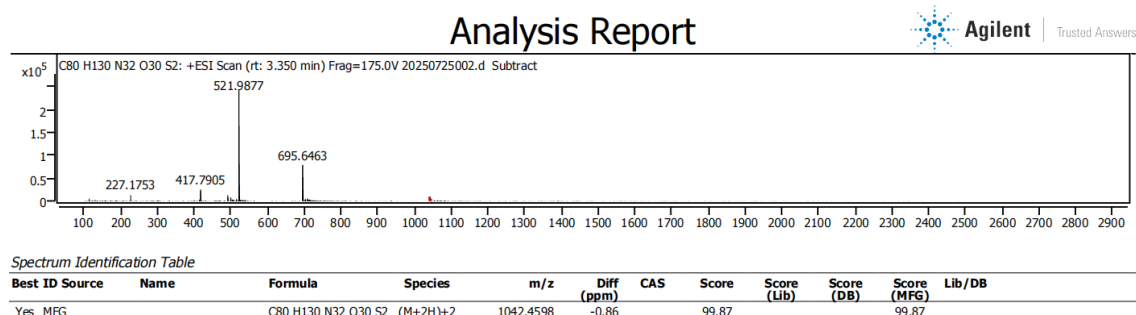

**Fig S127.** Q-TOF-HRMS spectrum of L3 and 3,6-DCT reaction mixture. HRMS (ES+) m/z:  $[M+2H]^{2+}$  calcd for C<sub>80</sub>H<sub>130</sub>N<sub>32</sub>O<sub>30</sub>S<sub>2</sub> 1042.4536, found 1042.4598.

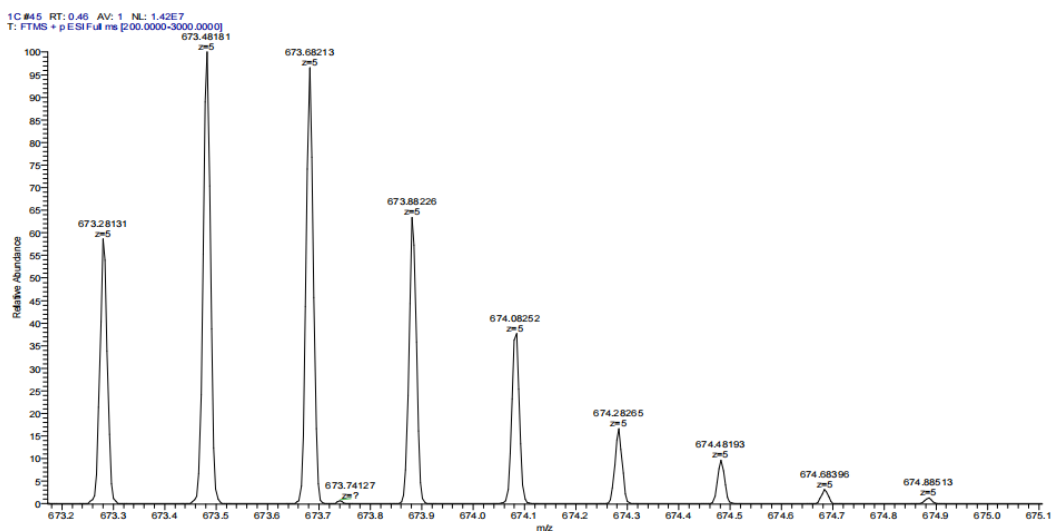

**Fig S128.** Q-TOF-HRMS spectrum of **O3-tri**. HRMS (ES+) m/z: [M+5H]<sup>5+</sup> calcd for C<sub>126</sub>H<sub>192</sub>N<sub>60</sub>O<sub>46</sub>S<sub>3</sub> 673.27, found 673.28.

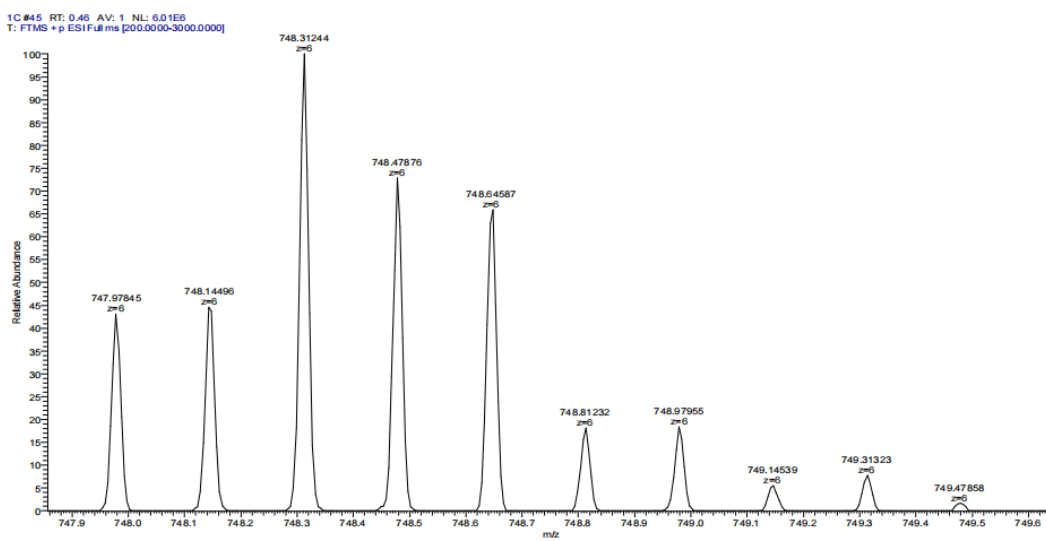

**Fig S129.** Q-TOF-HRMS spectrum of **O3-tetra**. HRMS (ES+) m/z: [M+6H]<sup>6+</sup> calcd for C<sub>168</sub>H<sub>256</sub>N<sub>80</sub>O<sub>60</sub>S<sub>4</sub> 747.98, found 747.98.

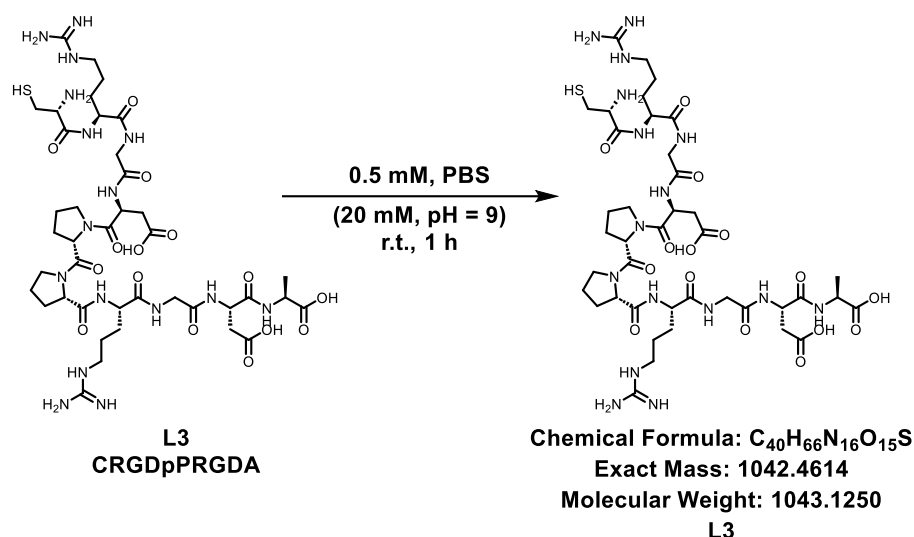

The dried peptide **L3** (1.0 equiv.) was dissolved in appropriate amount of PBS (20 mM, pH = 9.0) to reach a concentration of 0.5 mM. The reaction mixture was shaken at 25 °C and 800 rpm for 1 h on a thermostatic shaker.

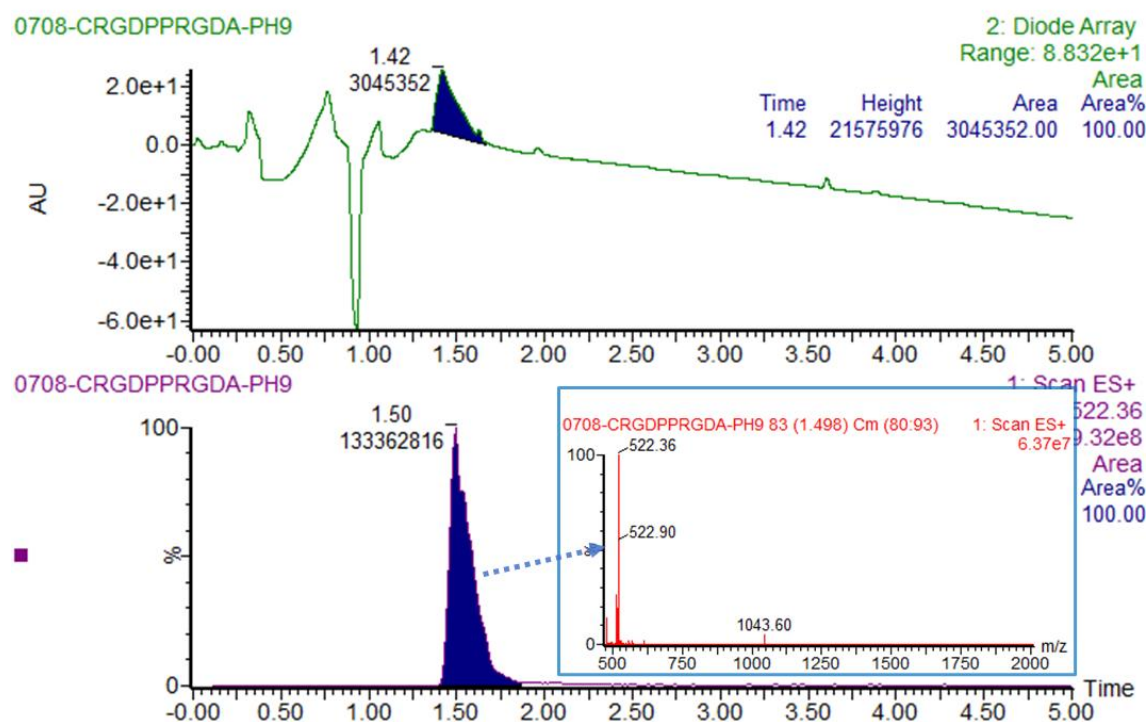

**Fig S130.** UPLC-MS chromatogram of **L3** without 3,6-DCT reaction mixture including TIC, UV curve (full-wavelength) and ESI-MS spectrum. Extract mass chromatograms from full scan data.

#### Control experiments with L4:

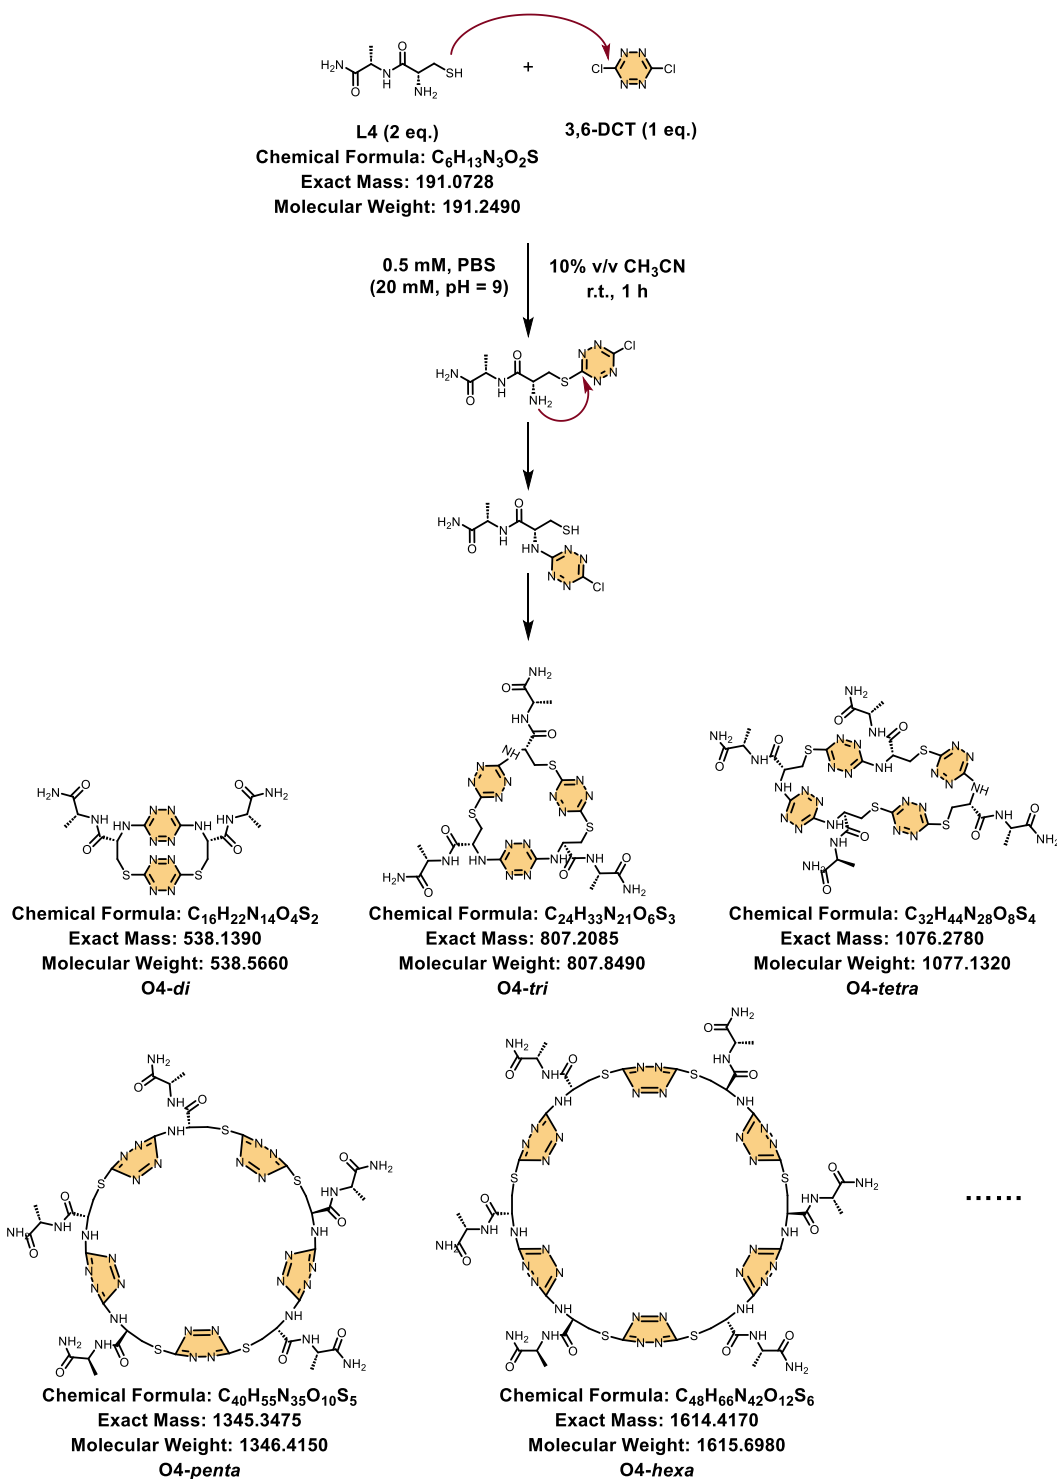

The dried peptide **L4** (2.0 equiv.) was dissolved in appropriate amount of PBS (20 mM, pH = 9.0) to reach a concentration of 0.56 mM. To this solution, 3,6-DCT (1.0 equiv.) dissolved in acetonitrile (1/9 of the volume of buffer) was added. The final concentrations in the reaction were 0.5 mM peptide, 0.5 mM 3,6-DCT and 10% acetonitrile, followed by thorough mixing. The reaction mixture was shaken at 25 °C and 800 rpm for 1 h on a thermostatic shaker.

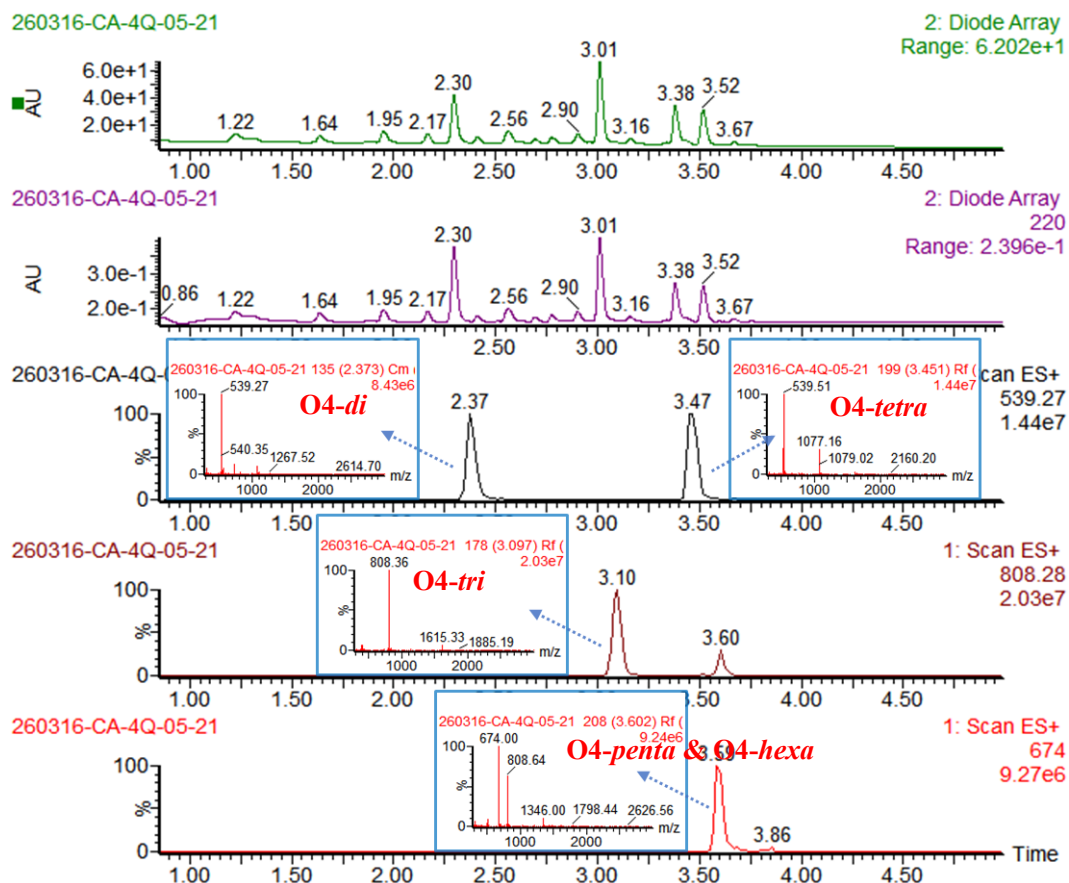

**Fig S131.** UPLC-MS chromatogram of L4 (2 eq.) with 3,6-DCT (1 eq.) reaction mixture including TIC, UV curves (full-wavelength and extracted at 220 nm) and ESI-MS spectrum. Extract mass chromatograms from full scan data.

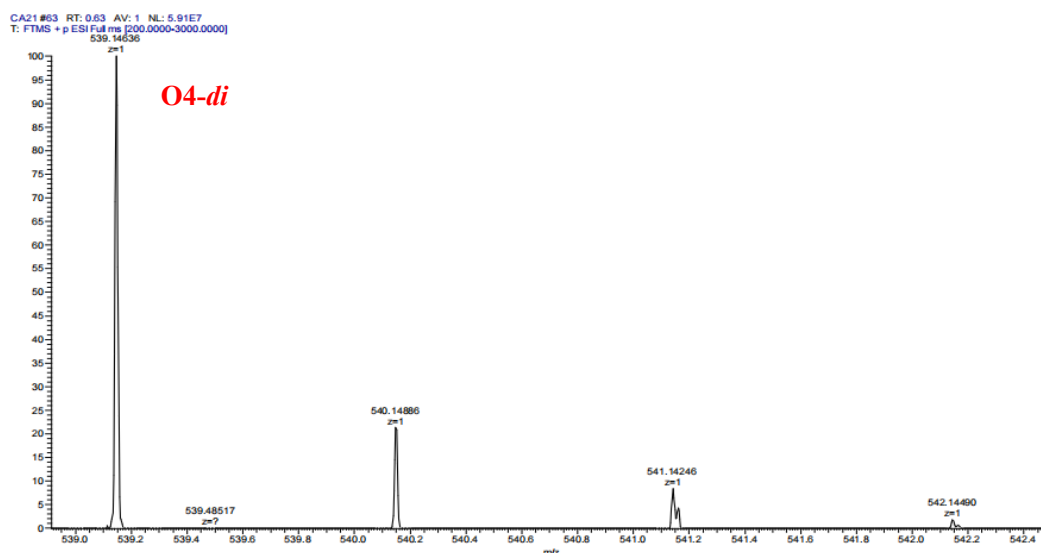

| m/z       | Theo. Mass | Delta (ppm) | RDB equiv. | Composition       |     |
|-----------|------------|-------------|------------|-------------------|-----|
| 539.14636 | 539.14626  | 0.18        | 12.5       | C16 H23 O4 N14 S2 | M+H |

**Fig S132.** Q-TOF-HRMS spectrum of **O4-di**. HRMS (ES+) m/z:  $[M+H]^+$  calcd for  $C_{16}H_{23}N_{14}O_4S_2$

539.14, found 539.14.

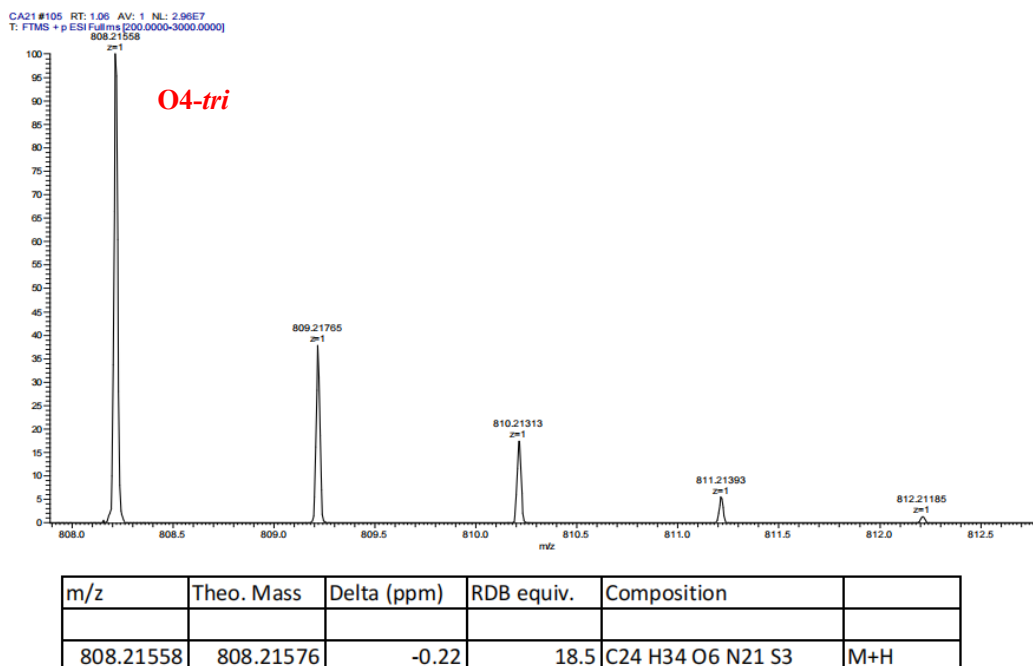

**Fig S133.** Q-TOF-HRMS spectrum of **O4-tri**. HRMS (ES+) m/z: [M+H]<sup>+</sup> calcd for C<sub>24</sub>H<sub>33</sub>N<sub>21</sub>O<sub>6</sub>S<sub>3</sub> 808.21, found 808.21.

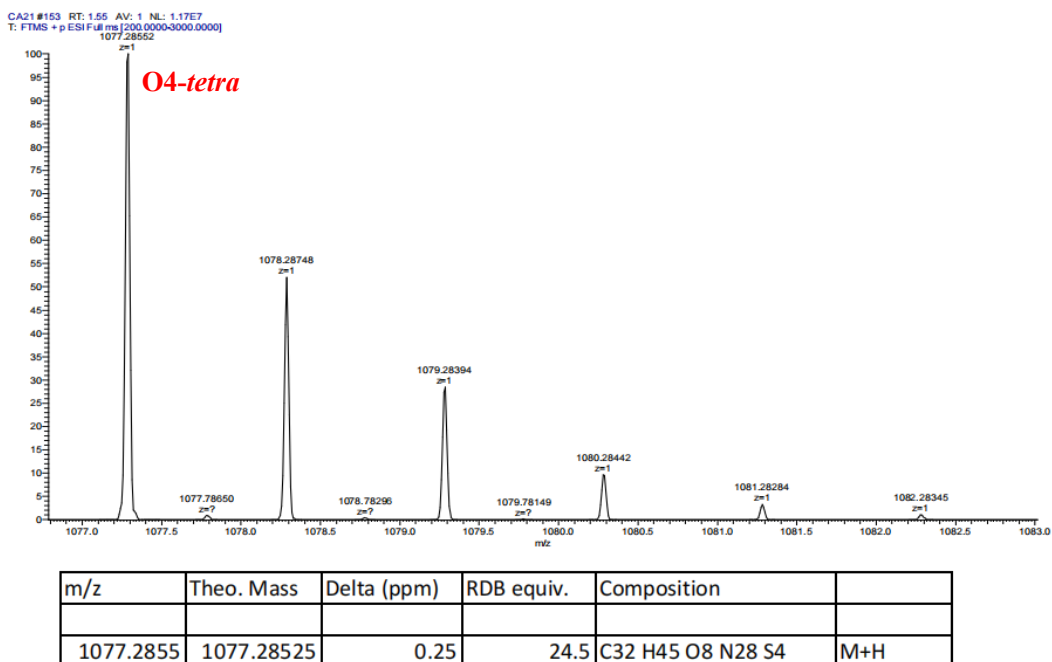

**Fig S134.** Q-TOF-HRMS spectrum of **O4-tetra**. HRMS (ES+) m/z: [M+H]<sup>+</sup> calcd for C<sub>32</sub>H<sub>44</sub>N<sub>28</sub>O<sub>8</sub>S<sub>4</sub> 1077.28, found 1077.29.

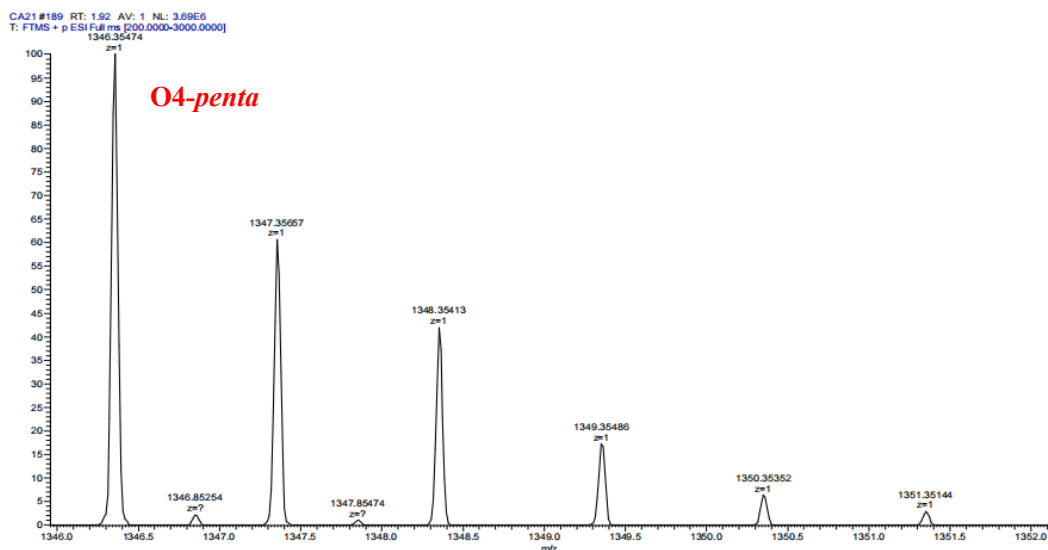

| m/z       | Theo. Mass | Delta (ppm) | RDB equiv. | Composition        |     |
|-----------|------------|-------------|------------|--------------------|-----|
| 1346.3547 | 1346.35474 | 0           | 30.5       | C40 H56 O10 N35 S5 | M+H |

**Fig S135.** Q-TOF-HRMS spectrum of **O4-penta**. HRMS (ES<sup>+</sup>) m/z: [M+H]<sup>+</sup> calcd for C<sub>40</sub>H<sub>55</sub>N<sub>35</sub>O<sub>10</sub>S<sub>5</sub> 1346.35, found 1346.35.

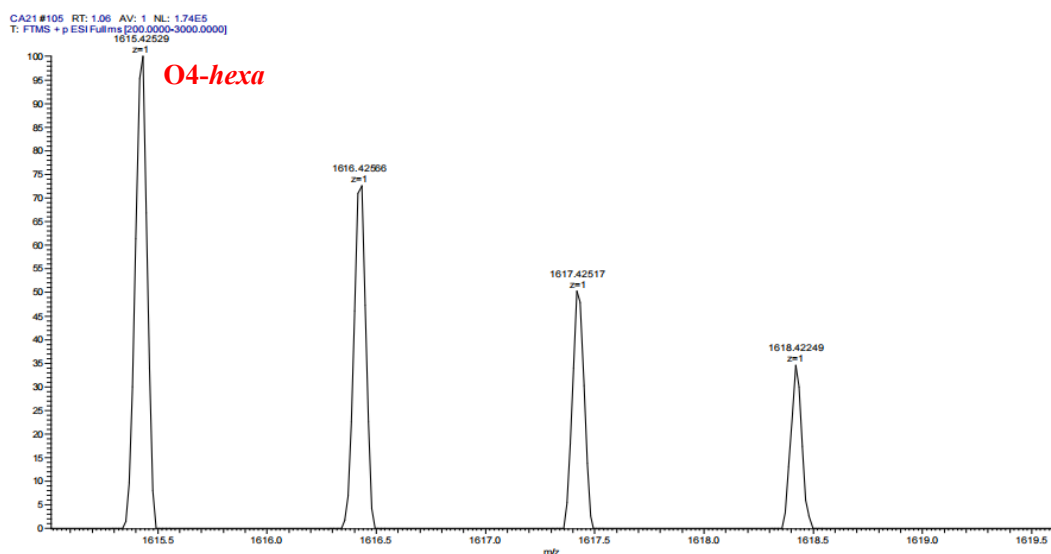

| m/z       | Theo. Mass | Delta (ppm) | RDB equiv. | Composition        |     |
|-----------|------------|-------------|------------|--------------------|-----|
| 1615.4253 | 1615.42424 | 0.65        | 36.5       | C48 H67 O12 N42 S6 | M+H |

**Fig S136.** Q-TOF-HRMS spectrum of **O4-hexa**. HRMS (ES<sup>+</sup>) m/z: [M+H]<sup>+</sup> calcd for C<sub>48</sub>H<sub>66</sub>N<sub>42</sub>O<sub>12</sub>S<sub>6</sub> 1615.42, found 1615.43.

**Control experiments v and vi:**

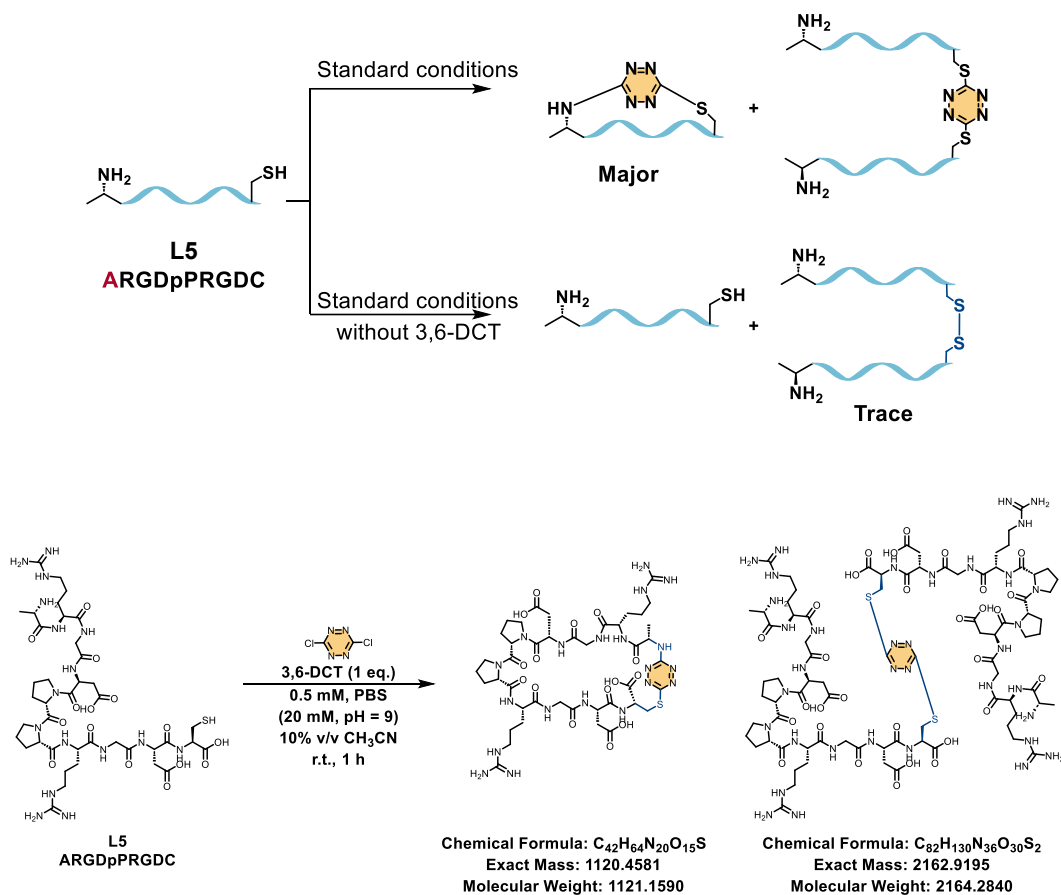

The dried peptide **L5** (1.0 equiv.) was dissolved in appropriate amount of PBS (20 mM, pH = 9.0) to reach a concentration of 0.56 mM. To this solution, 3,6-DCT (1.0 equiv.) dissolved in acetonitrile (1/9 of the volume of buffer) was added. The final concentrations in the reaction were 0.5 mM peptide, 0.5 mM 3,6-DCT and 10% acetonitrile, followed by thorough mixing. The reaction mixture was shaken at 25 °C and 800 rpm for 1 h on a thermostatic shaker.

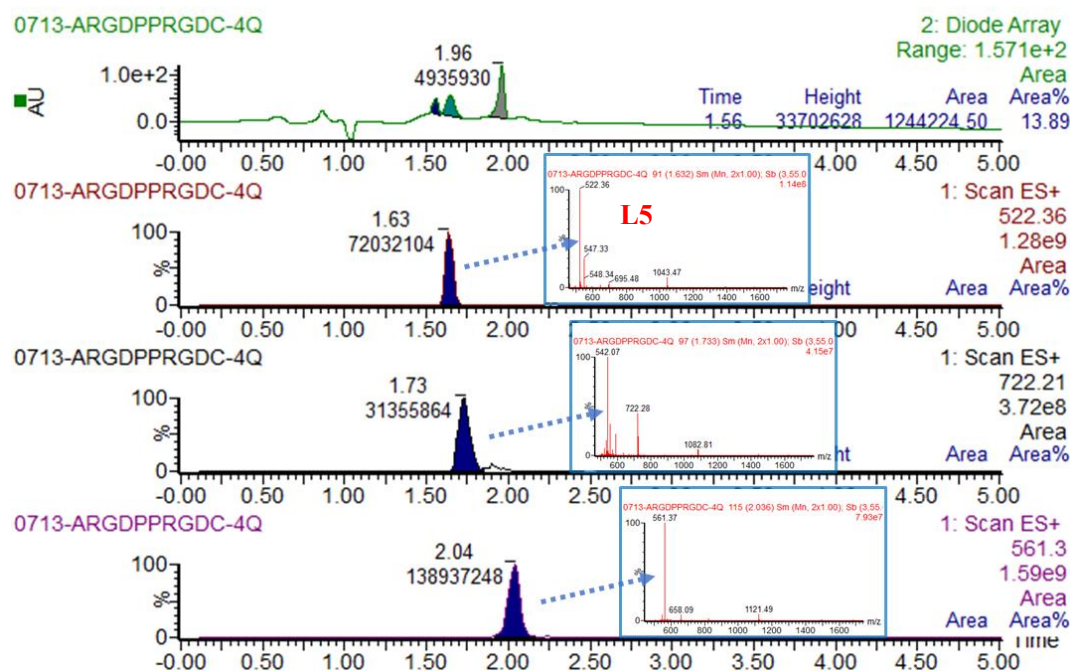

**Fig S137.** UPLC-MS chromatogram of **L5** and 3,6-DCT reaction mixture including TIC, UV curve (full-wavelength) and ESI-MS spectrum. Extract mass chromatograms from full scan data.

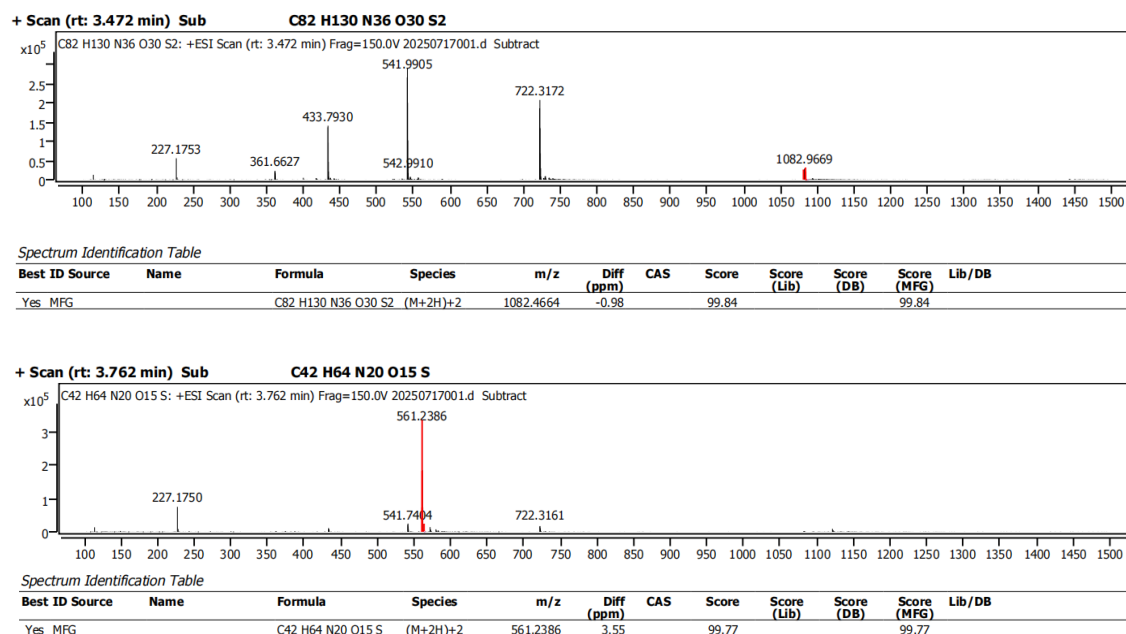

**Fig S138.** Q-TOF-HRMS spectrum of **L5** and 3,6-DCT reaction mixture. HRMS (ES+) m/z:  $[M+2H]^{2+}$  calcd for  $C_{82}H_{130}N_{36}O_{30}S_2$  1082.4598, found 1082.4664. HRMS (ES+) m/z:  $[M+2H]^{2+}$  calcd for  $C_{42}H_{64}N_{20}O_{15}S$  561.2291, found 561.2386.

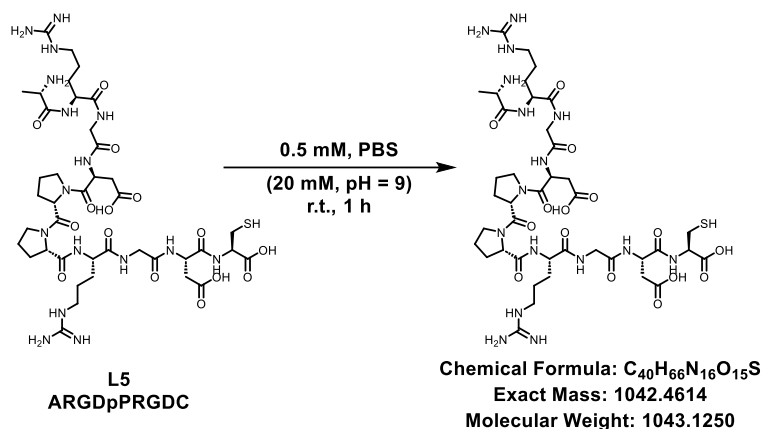

The dried peptide **L5** (1.0 equiv.) was dissolved in appropriate amount of PBS (20 mM, pH = 9.0) to reach a concentration of 0.5 mM. The reaction mixture was shaken at 25 °C and 800 rpm for 1 h on a thermostatic shaker.

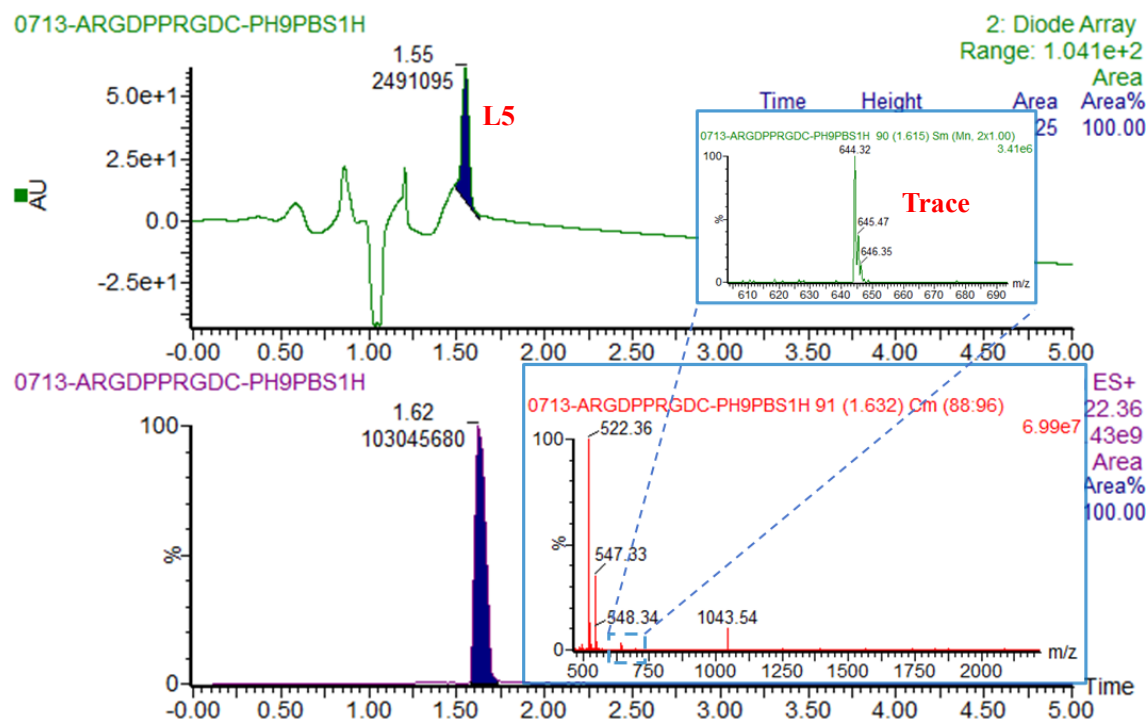

**Fig S139.** UPLC-MS chromatogram of **L5** without 3,6-DCT reaction mixture including TIC, UV curve (full-wavelength) and ESI-MS spectrum. Extract mass chromatograms from full scan data.

## 5.2 Structure characterization

Confirmation experiments vii:

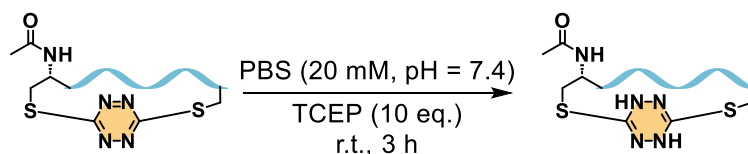

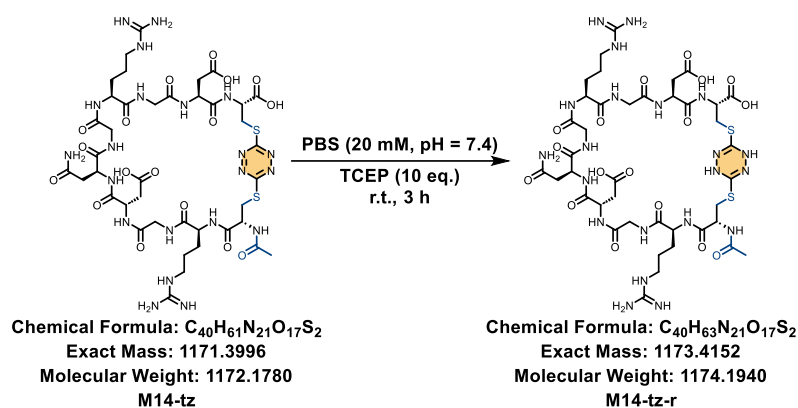

The lyophilized monocyclic product (**M14-tz**) was dissolved in PBS (20 mM, pH = 7.4), treated with TCEP (10 equiv.), and reacted at room temperature for 3 h.

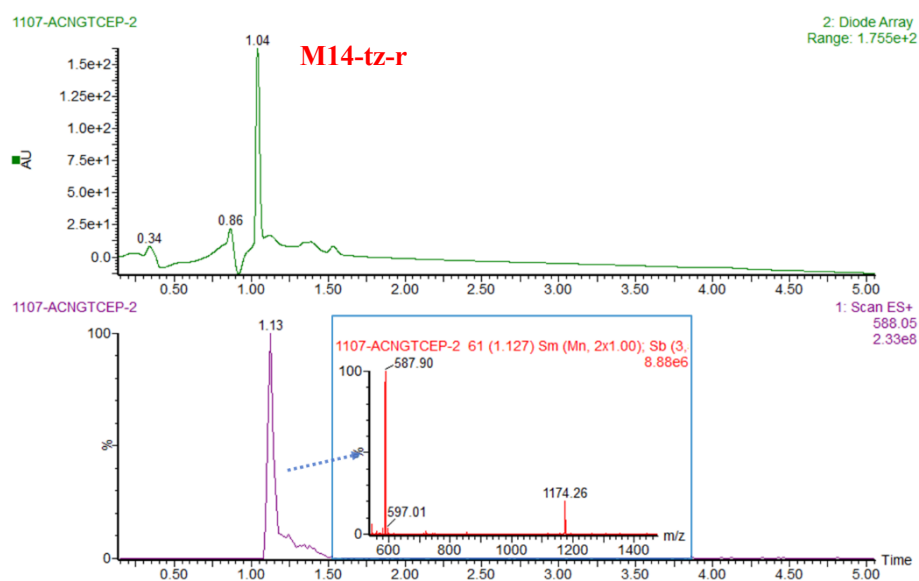

**Fig S140.** UPLC-MS chromatogram of **M14-tz-r** and TCEP reaction mixture including TIC, UV curve (full-wavelength) and ESI-MS spectrum. Extract mass chromatograms from full scan data.

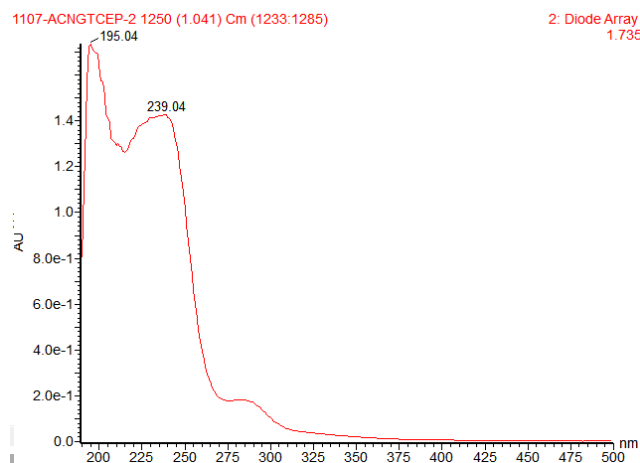

**Fig S141.** The UV characteristic absorption of **M14-tz-r**.

### Confirmation experiments viii:

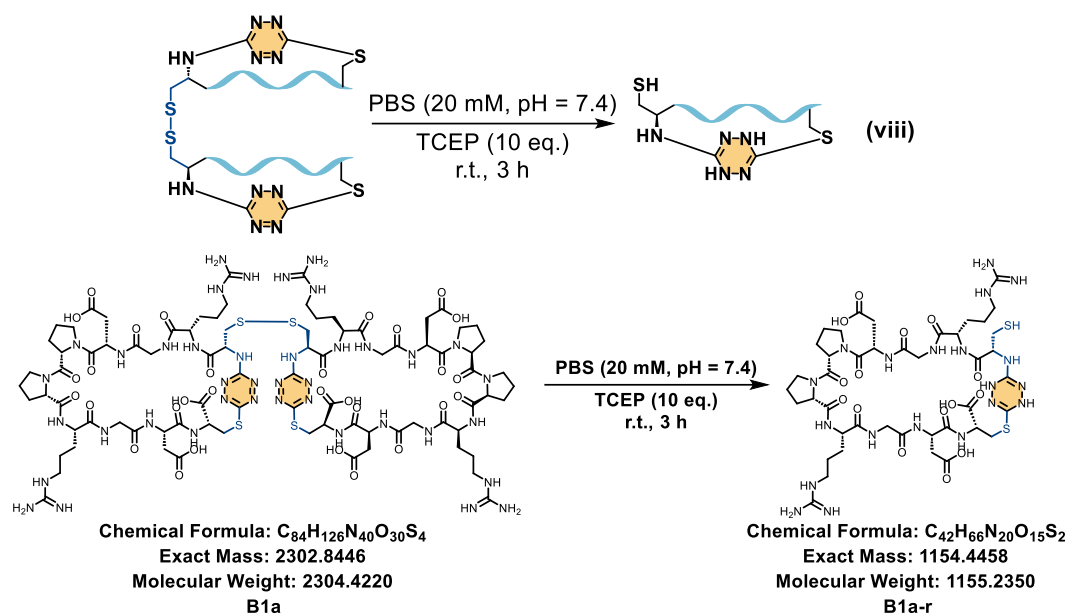

The lyophilized product **B1a** was dissolved in PBS (20 mM, pH = 7.4), treated with TCEP (10 equiv.), and reacted at room temperature for 3 h.

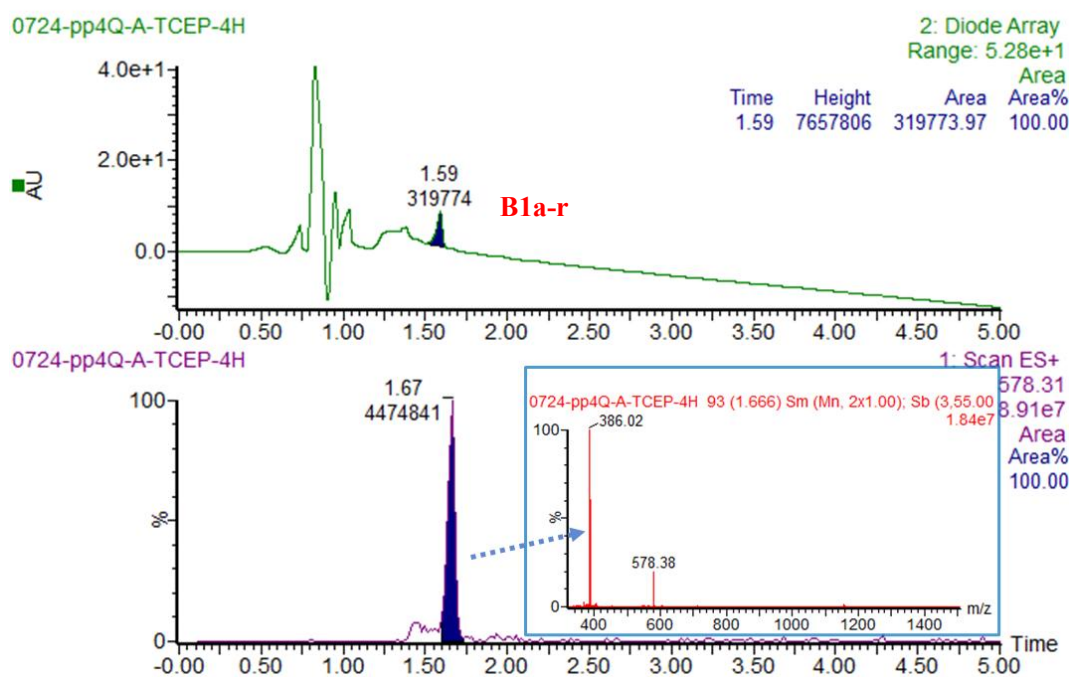

**Fig S142.** UPLC-MS chromatogram of **B1a** and TCEP reaction mixture including TIC, UV curve (full-wavelength) and ESI-MS spectrum. Extract mass chromatograms from full scan data.

# Analysis Report

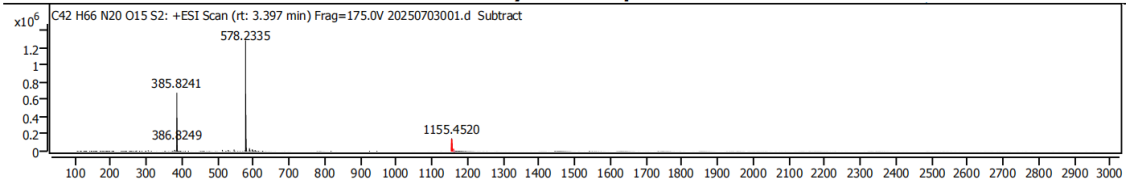

### Spectrum Identification Table

| Best ID Source | Name | Formula                                                                        | Species            | m/z       | Diff (ppm) | CAS | Score | Score (Lib) | Score (DB) | Score (MFG) | Lib/DB |
|----------------|------|--------------------------------------------------------------------------------|--------------------|-----------|------------|-----|-------|-------------|------------|-------------|--------|
| Yes            | MFG  | C <sub>42</sub> H <sub>66</sub> N <sub>20</sub> O <sub>15</sub> S <sub>2</sub> | (M+H) <sup>+</sup> | 1155.4520 | -1.08      |     | 99.42 |             |            | 99.42       |        |

**Fig S143.** Q-TOF-HRMS spectrum of **B1a-r**. HRMS (ES<sup>+</sup>) m/z: [M+H]<sup>+</sup> calcd for C<sub>42</sub>H<sub>66</sub>N<sub>20</sub>O<sub>15</sub>S<sub>2</sub> 1155.4458, found 1155.4520.

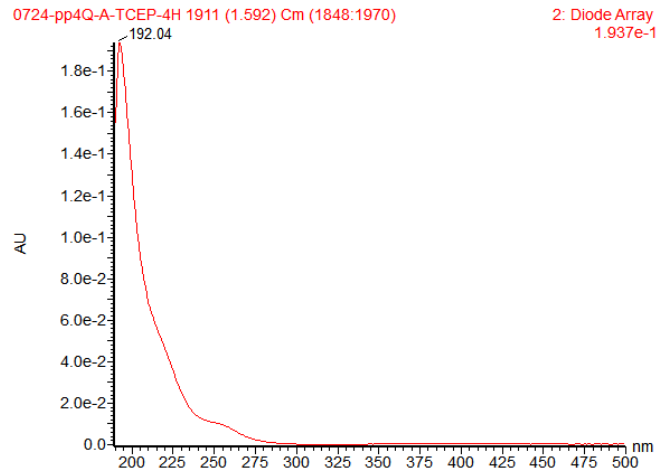

**Fig S144.** The UV characteristic absorption of **B1a-r**.

## Confirmation experiments ix:

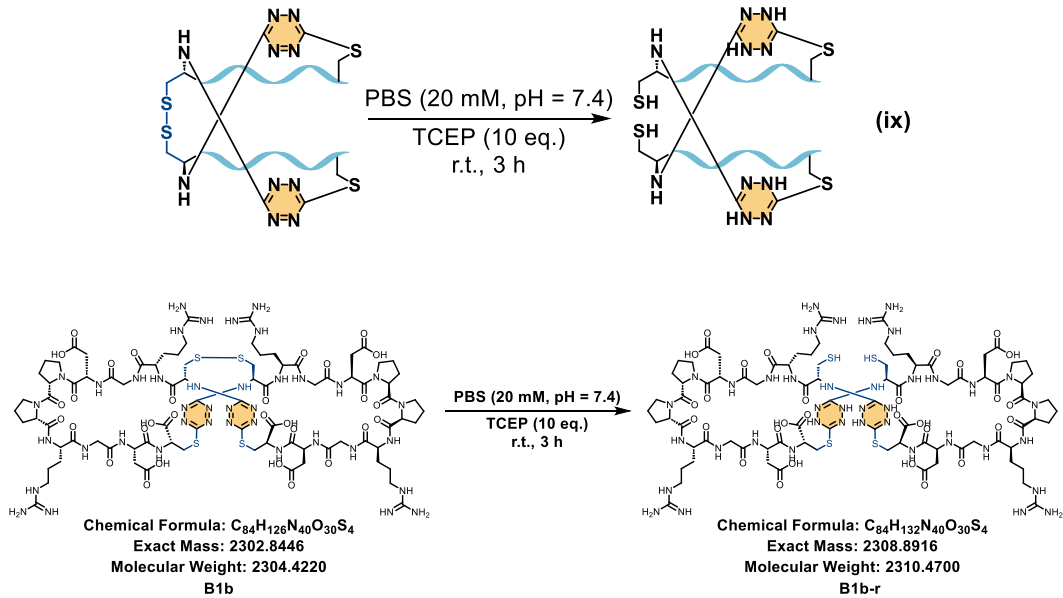

The lyophilized product **B1b** was dissolved in PBS (20 mM, pH = 7.4), treated with TCEP (10 equiv.), and reacted at room temperature for 3 h.

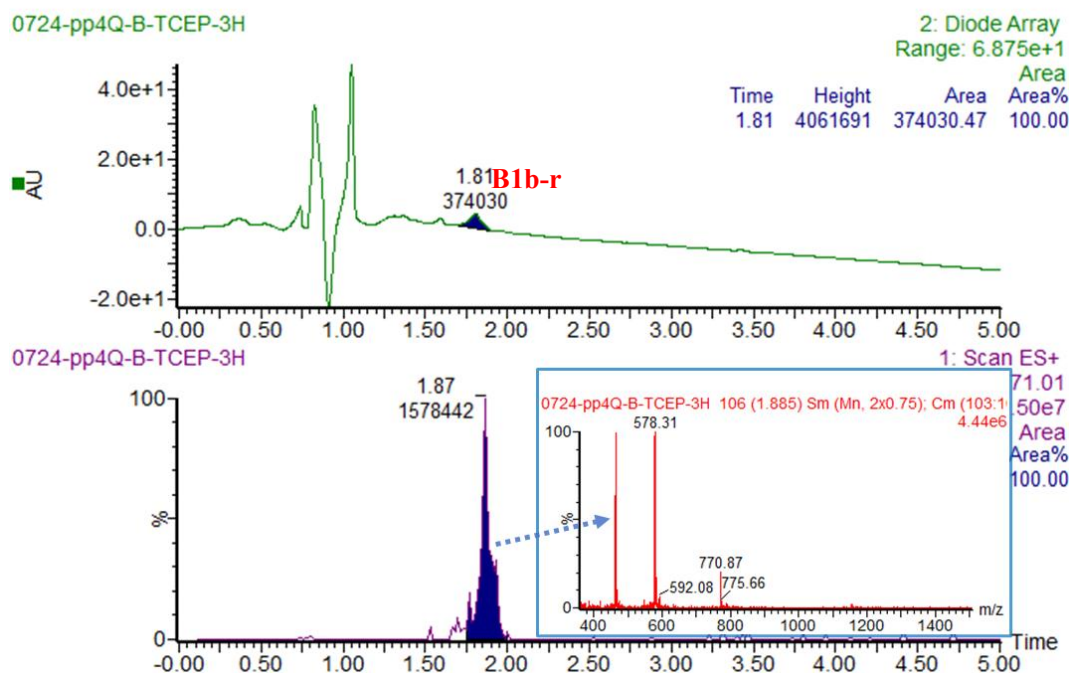

**Fig S145.** UPLC-MS chromatogram of **B1b** and TCEP reaction mixture including TIC, UV curve (full-wavelength) and ESI-MS spectrum. Extract mass chromatograms from full scan data.

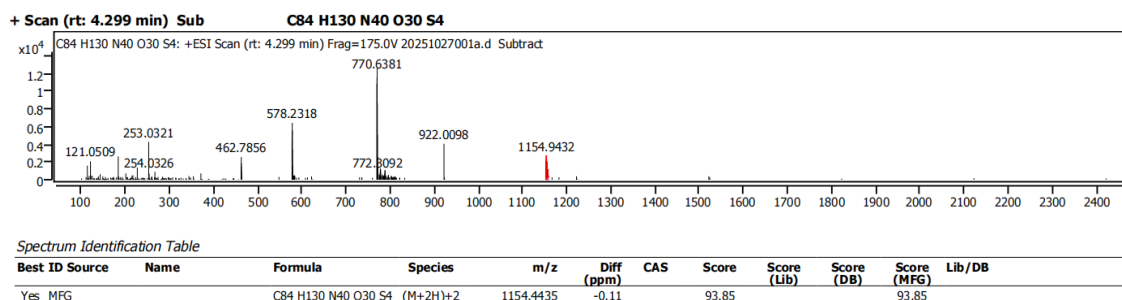

**Fig S146.** Q-TOF-HRMS spectrum of **B1b-r**. HRMS (ES<sup>+</sup>) m/z: [M+2H]<sup>2+</sup> calcd for C<sub>84</sub>H<sub>130</sub>N<sub>40</sub>O<sub>30</sub>S<sub>4</sub> 1155.4458, found 1154.9432.

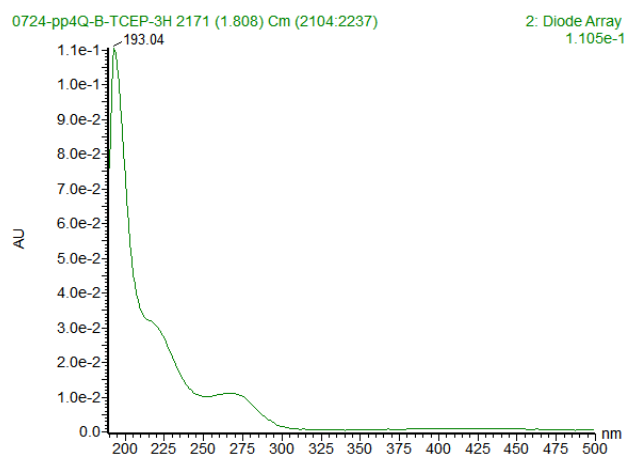

**Fig S147.** The UV characteristic absorption of **B1b-r**.

### 5.3 Detailed NMR assignment of key residues in B1a and B1b

The unambiguous determination of the three-dimensional topologies for isomers **B1a** and **B1b** relies heavily on the precise  $^1\text{H}$  and  $^{13}\text{C}$  NMR assignments of three cornerstone residues: the N-terminal Cys1, the C-terminal Cys10, and the sequentially adjacent Asp9. The assignment strategy utilized a rigorous combination of 2D TOCSY, COSY, HSQC, HMBC, and ROESY experiments, employing a bottom-up spin-system extraction and sequential walk approach.

#### 5.3.1 NMR assignment of B1a

##### Assignment of the C-terminal Cys10:

The assignment was anchored at the C-terminus by identifying the Cys10 spin system. Starting from its distinct amide proton (NH) at 8.32 ppm, TOCSY and COSY spectra revealed intra-residue scalar couplings to its  $H\alpha$  (4.45 ppm) and diastereotopic  $H\beta$  protons (3.44 and 3.72 ppm). HSQC analysis mapped these  $H\beta$  protons to a  $C\beta$  chemical shift of 30.9 ppm, a textbook value for an aromatic thioether, confirming the S-Ar linkage. Crucially, HMBC cross-peaks from these Cys10  $H\beta$  protons directly to a quaternary carbon at 166.35 ppm (tetrazine core) provided definitive proof of the C-terminal covalent attachment.

##### Sequential walk and assignment of Asp9:

With Cys10 unambiguously anchored, the adjacent residue (Asp9) was identified via a ROESY sequential walk. A highly intense inter-residue spatial contact ( $d_{\alpha\text{N}}$ ) was observed between the Cys10 NH (8.32 ppm) and an  $H\alpha$  signal at 4.57 ppm, stereochemically assigning this  $H\alpha$  to the preceding residue, Asp9. Using this  $H\alpha$  (4.57 ppm) as a starting point in the TOCSY and COSY spectra, the complete Asp9 spin network was extracted: NH (8.07 ppm) and two diastereotopic  $H\beta$  protons (2.42 and 2.60 ppm). HSQC correlations verified the corresponding carbon shifts as  $C\alpha$  (49.24 ppm) and  $C\beta$  (35.98 ppm). The  $C\beta$  shift at  $\sim 36$  ppm is an exclusive hallmark of the aspartic acid side chain. Furthermore, HMBC correlations from the Asp9  $H\beta$  (2.42 ppm) to its own  $C\alpha$  (49.52 ppm) and carbonyl carbon (171.86 ppm) perfectly closed the spin system loop, verifying the residue identity beyond doubt.

##### Assignment of the N-terminal Cys1:

The N-terminal Cys1 NH was located at an unusually downfield position of 8.84 ppm, characteristic of a proton sterically forced into the deshielding cone of the tetrazine ring in a constrained hairpin. TOCSY cross-peaks linked this NH to its  $H\alpha$  at 4.73 ppm and  $H\beta$  at 3.11 ppm. HSQC analysis mapped the Cys1  $H\beta$  to a  $C\beta$  shift of 40.18 ppm. This specific downfield carbon shift confirms that the Cys1 thiol is oxidized, participating in the intermolecular disulfide bond. The N-Ar covalent linkage was verified by a clear  $^3J_{CH}$  HMBC cross-peak extending from the Cys1  $H\alpha$  (4.73 ppm) across the secondary amine nitrogen to the tetrazine quaternary carbon (~160.83 ppm).

### 5.3.2 NMR Assignment of B1b

The resonance assignment for **B1b** followed the identical logical pathway, revealing highly conserved chemical environments for the local covalent nodes, but drastic variations reflecting the topological expansion.

#### Cys10 and Asp9 in B1b:

The C-terminal Cys10 was identified by its  $NH$  at 8.33 ppm and  $H\alpha$  at 4.46 ppm, showing virtually no chemical shift perturbation compared to **B1a**. The sequential ROESY walk from the Cys10  $NH$  (8.33 ppm) identified a strong  $d_{\alpha N}$  contact to the preceding Asp9  $H\alpha$  at 4.58 ppm. TOCSY and HSQC extraction of this 4.58 ppm signal yielded an almost identical Asp9 spin network to that of **B1a** ( $NH$ : ~8.07 ppm,  $H\beta$ : 2.42/2.60 ppm,  $C\beta$ : ~36.0 ppm).

#### Cys1 in B1b:

In stark contrast to the C-terminus, the N-terminal Cys1 experienced significant perturbations. Its  $NH$  proton exhibited a prominent upfield shift to 8.59 ppm, and its  $H\alpha$  shifted to 4.83 ppm. While the Cys1  $C\beta$  shift remained at 39.97 ppm (confirming the intact disulfide bond), the critical HMBC signal from Cys1  $H\alpha$  to the tetrazine carbon was completely absent. As discussed in the main text, this absence is indicative of a near-90° dihedral angle specific to the special conformation. The definitive assignment of these **B1b** residues laid the groundwork for identifying the crucial inter-chain Cys1  $H\alpha$  (4.83 ppm) to Asp9  $H\alpha$  (4.58 ppm) NOE cross-peak, physically proving the topological crossing.

**Tab S9. Detailed <sup>1</sup>H and <sup>13</sup>C NMR chemical shifts (ppm) of key residues in B1a and B1b**

| Isomer     | Residue | CONH<br>( <sup>1</sup> H) | H $\alpha$<br>( <sup>1</sup> H) | C $\alpha$<br>( <sup>13</sup> C) | H $\beta$<br>( <sup>1</sup> H) | C $\beta$<br>( <sup>13</sup> C) | Key 2D<br>Correlations<br>(HMBC/ROESY)                 |
|------------|---------|---------------------------|---------------------------------|----------------------------------|--------------------------------|---------------------------------|--------------------------------------------------------|
| <b>B1a</b> | Cys1    | 8.84                      | 4.73                            | 54.10                            | 3.11                           | 40.18                           | HMBC: H $\alpha$ $\rightarrow$ Tetrazine C<br>(160.83) |
|            | Asp9    | 8.07                      | 4.57                            | 49.24                            | 2.42,<br>2.60                  | 35.98                           |                                                        |
|            | Cys10   | 8.33                      | 4.45                            | 51.45                            | 3.72,<br>3.45                  | 30.9                            | HMBC: H $\beta$ $\rightarrow$ Tetrazine C<br>(166.35)  |
| <b>B1b</b> | Cys1    | 8.59                      | 4.83                            | 54.04                            | 3.20                           | 39.97                           |                                                        |
|            | Asp9    | 8.08                      | 4.58                            | 50.95                            | 2.44,<br>2.62                  | 36.15                           | ROESY: NH $\rightarrow$ Asp9 H $\alpha$<br>(4.58)      |
|            | Cys10   | 8.33                      | 4.45                            | 51.39                            | 3.46,<br>3.72                  | 30.7                            | HMBC: H $\beta$ $\rightarrow$ Tetrazine C<br>(166.69)  |

## 6. Sequence determinants impacting the 3,6-DCT mediated cyclodimerization

### 6.1 Reaction of N-Cys-containing peptides

#### Example procedure (Standard reaction conditions):

The dried peptide substrate with N-Cys (1.0 equiv.), such as CRGDAARGDC (**L6**), was dissolved in appropriate amount of PBS (20 mM, pH = 9.0) to reach a concentration of 0.56 mM. To this solution, 3,6-DCT (1.0 equiv.) dissolved in acetonitrile (1/9 of the volume of buffer) was added. The final concentrations in the reaction were 0.5 mM peptide, 0.5 mM 3,6-DCT and 10% acetonitrile, followed by thorough mixing. The reaction mixture was shaken at 25 °C and 800 rpm for 1 h on a thermostatic shaker.

After completion, 50  $\mu$ L of the reaction mixture was collected, and 10  $\mu$ L was injected into the UPLC-MS for analysis. The peak area of the cyclodimerization products at 270 nm was recorded. Determine the LC-MS yield using **Equation 1**. Meanwhile, the ratio of the cyclodimerization product isomers was calculated based on the peak area ratio at 270 nm or the EIC area ratio. Detailed data are shown in **Table S10**.

**Tab S10. The LC-MS data for N-Cys-containing peptides collected using Method A**

| Peptide sequence | Peak area of | HPLC Yield (%) <sup>[a]</sup> | Ratio of isomers |
|------------------|--------------|-------------------------------|------------------|
| CRGDAARGDC       | 98232        | 49.43                         | 47/53            |
| CRGDGGRGDC       | 71033        | 34.93                         | 54/46            |
| CRGDNGRGDC       | 49747        | 23.58                         | 34/66            |
| CRGDpGRGDC       | 67876        | 33.24                         | 56/44            |
| CRGDAibpRGDC     | 84098        | 41.89                         | 42/58            |
| CRGDAibGRGDC     | 86036        | 42.93                         | 67/33            |
| CRGDAARGDCGS     | 99277        | 49.99                         | 65/35            |
| CDGRAADGRC       | 63260        | 30.78                         | 13/87            |
| CRGDAADGRC       | 78337        | 38.82                         | 11/89            |
| CDGRAARGDC       | 56238        | 27.04                         | 56/44            |
| CRDAARDC         | 88645        | 44.32                         | 65/35            |
| CRGDC            | 88968        | 44.49                         | 15/85            |
| CAAC             | 86282        | 43.06                         | 54/46            |
| CAAAC            | 100216       | 50.49                         | 70/30            |
| CAAAAC           | 96386        | 48.44                         | 84/16            |
| CAAAAAC          | 75384        | 37.25                         | 77/23            |
| CGSC             | 88039        | 43.99                         | \                |
| CGSGSC           | 83261        | 41.45                         | 40/60            |
| CGSGSGSC         | 94373        | 47.37                         | \                |
| CGSGSGSGSC       | 86586        | 43.22                         | \                |

[a] Yields were determined by LC-MS analysis using **Equation 1**

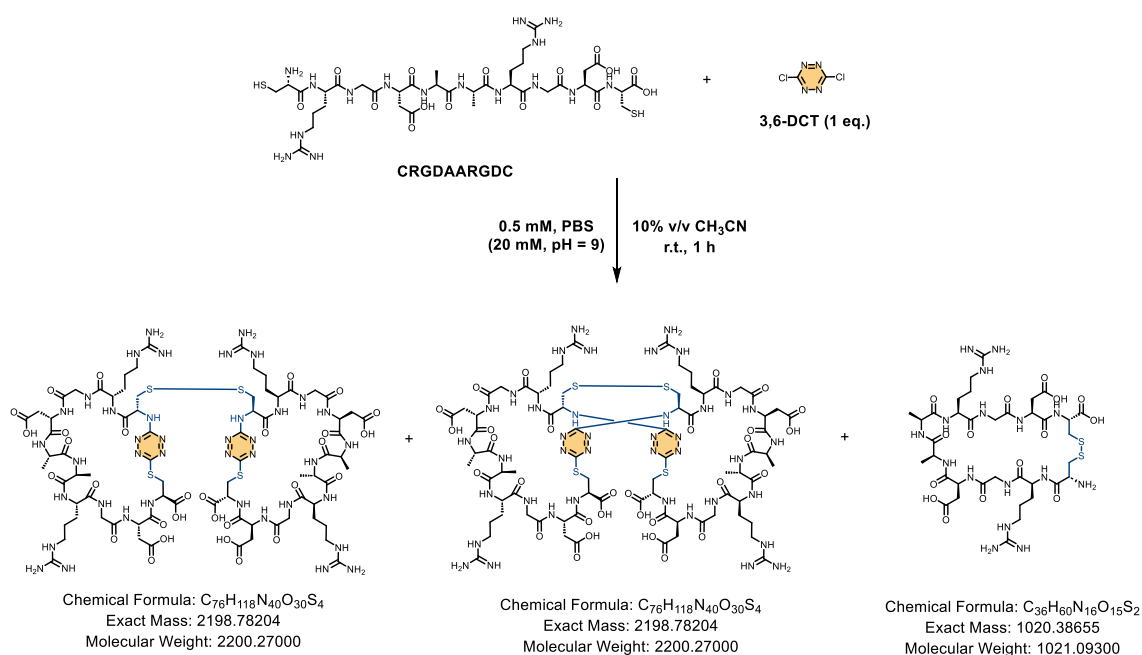



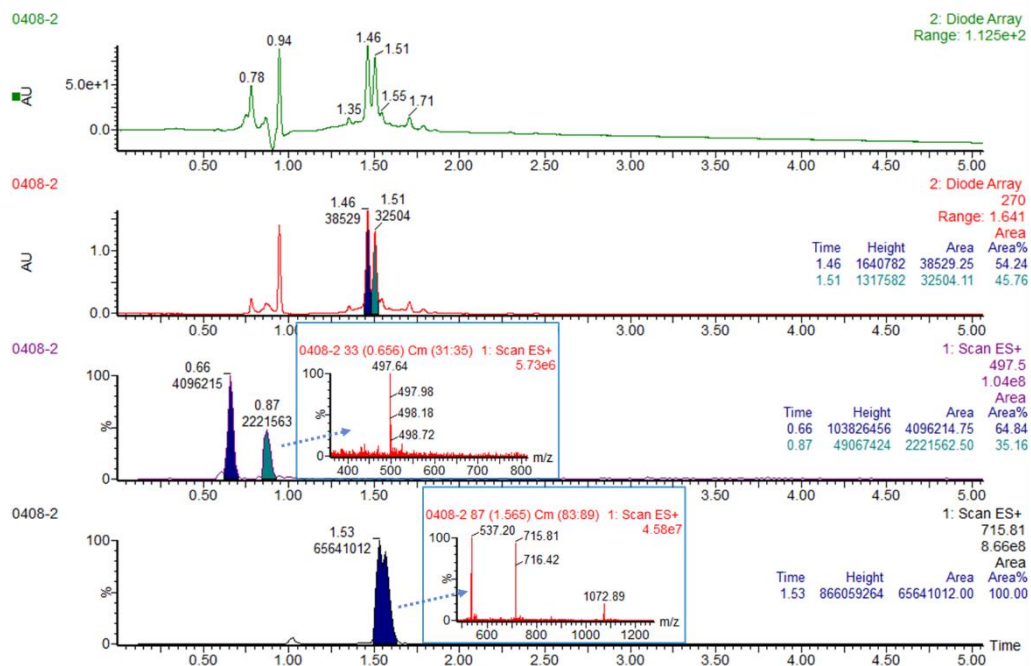

**Fig S149.** UPLC-MS chromatogram of L7 and 3,6-DCT reaction mixture including TIC, UV curves (full-wavelength and extracted at 270 nm) and ESI-MS spectrum. Extract mass chromatograms from full scan data. The yield of the corresponding cyclodimerization products was determined to be 35% using equation 1.

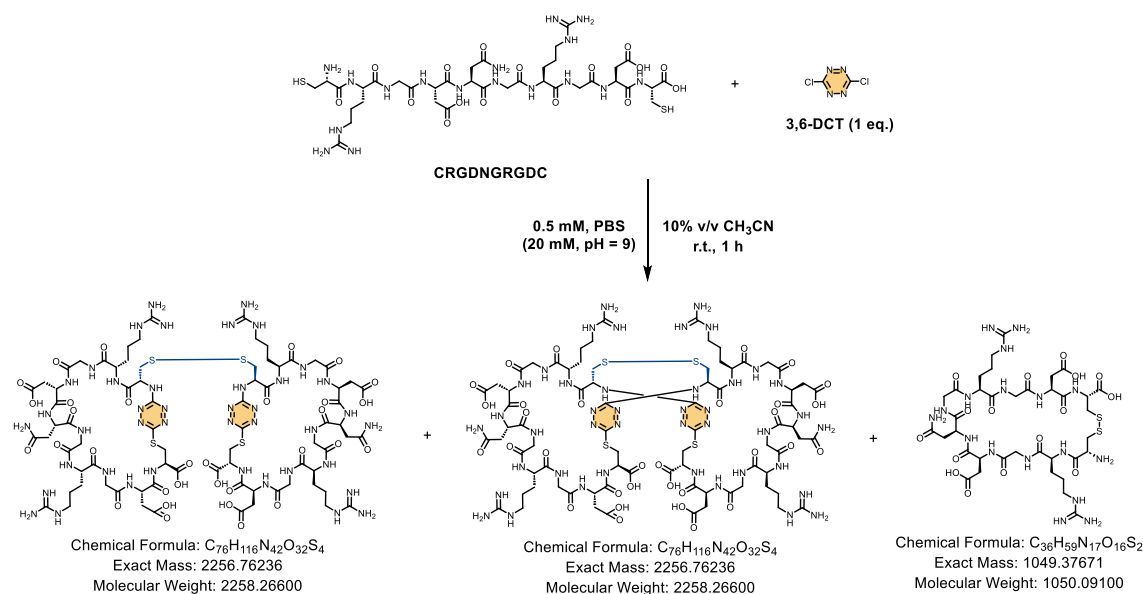

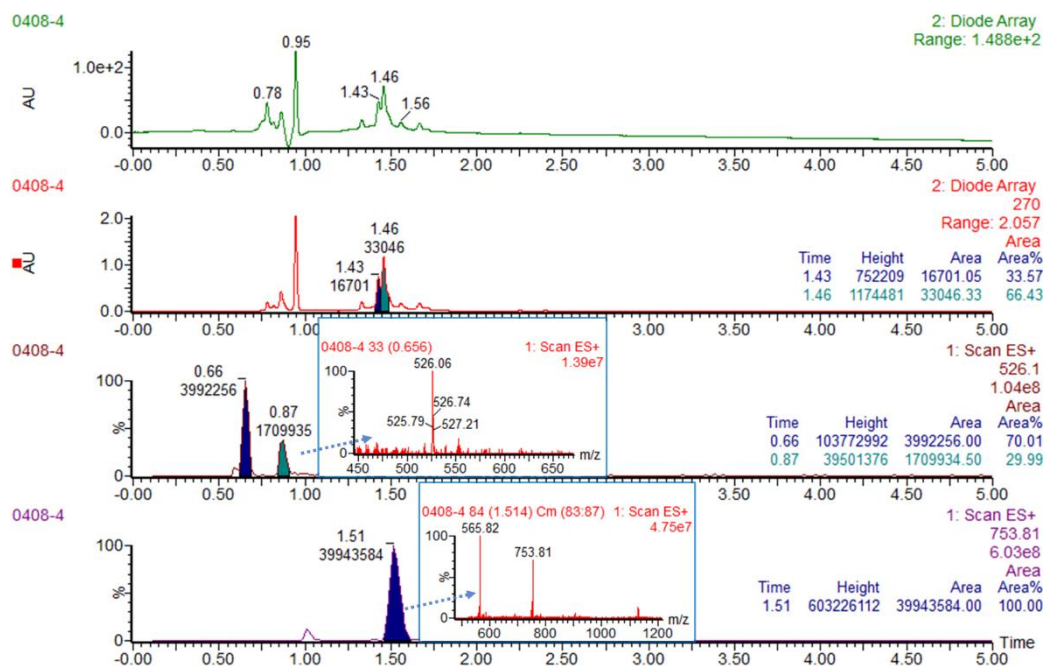

**Fig S150.** UPLC-MS chromatogram of **L8** and 3,6-DCT reaction mixture including TIC, UV curves (full-wavelength and extracted at 270 nm) and ESI-MS spectrum. Extract mass chromatograms from full scan data. The yield of the corresponding cyclodimerization products was determined to be 24% using equation 1.

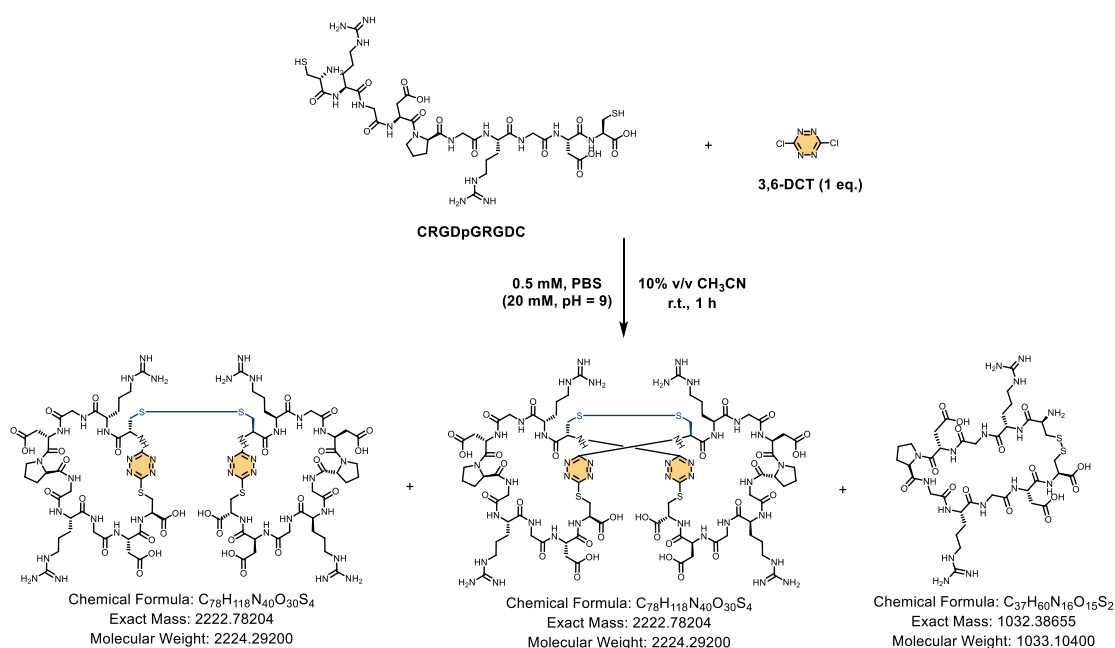

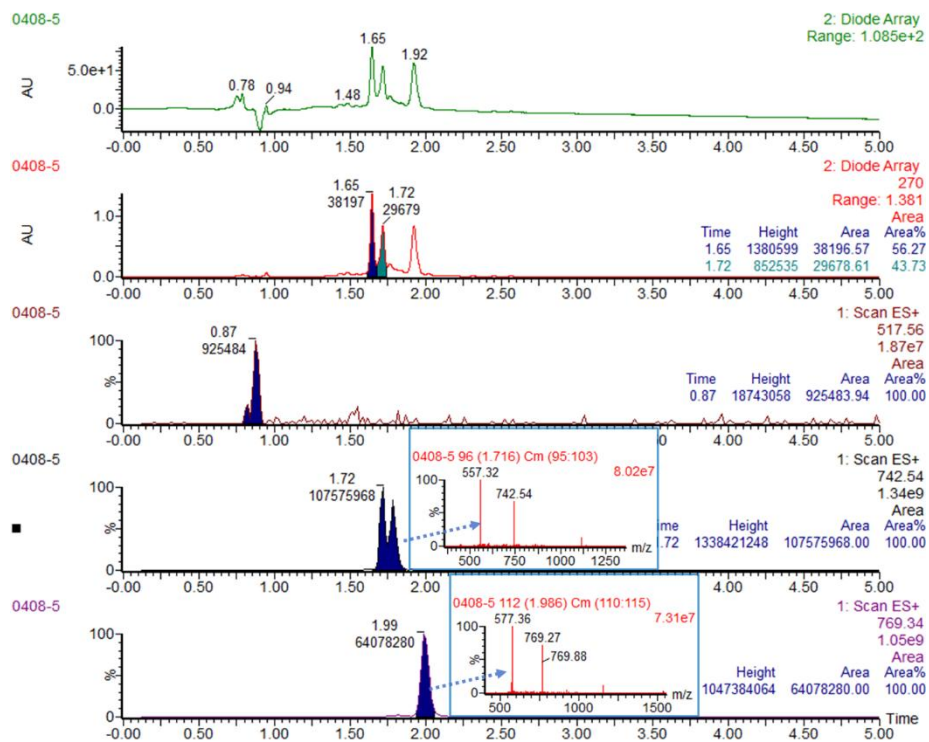

**Fig S151.** UPLC-MS chromatogram of L9 and 3,6-DCT reaction mixture including TIC, UV curves (full-wavelength and extracted at 270 nm) and ESI-MS spectrum. Extract mass chromatograms from full scan data. The yield of the corresponding cyclodimerization products was determined to be 33% using equation 1.

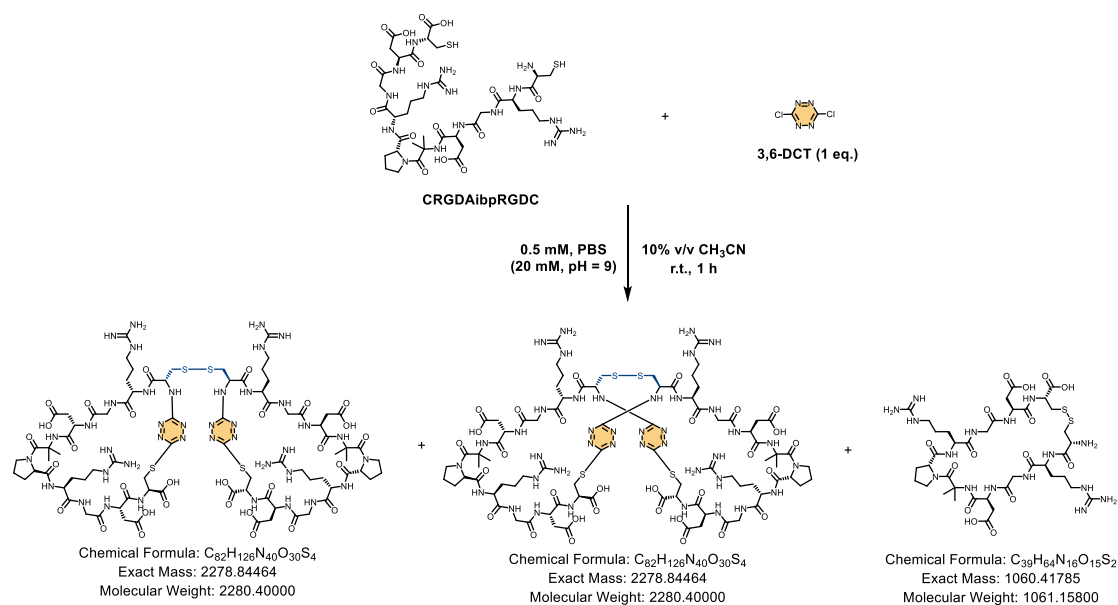

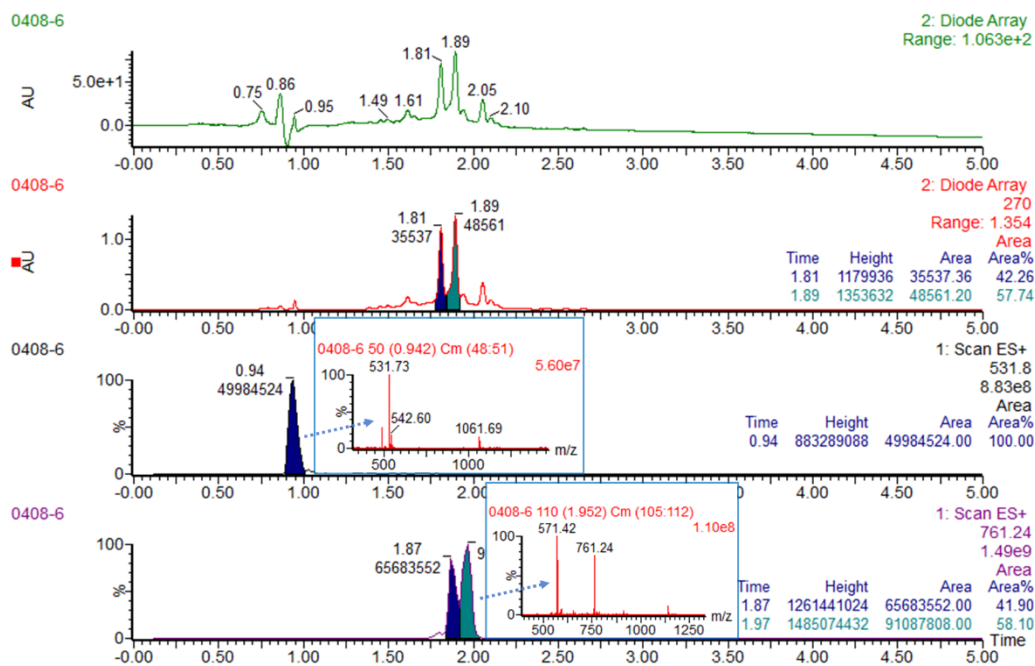

**Fig S152.** UPLC-MS chromatogram of L10 and 3,6-DCT reaction mixture including TIC, UV curves (full-wavelength and extracted at 270 nm) and ESI-MS spectrum. Extract mass chromatograms from full scan data. The yield of the corresponding cyclodimerization products was determined to be 42% using equation 1.

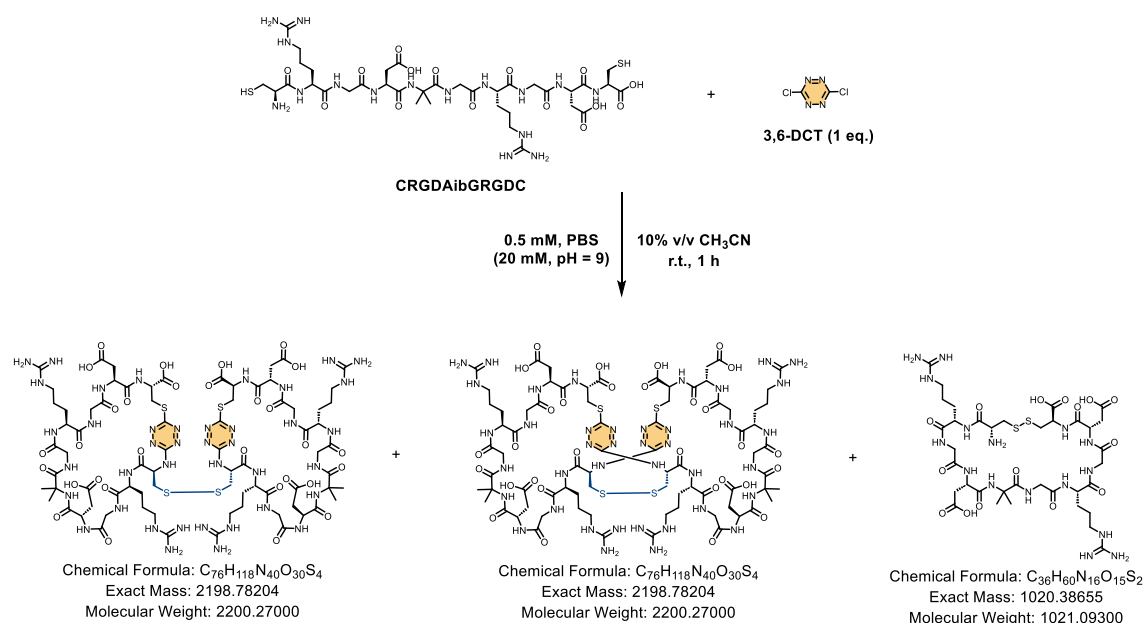

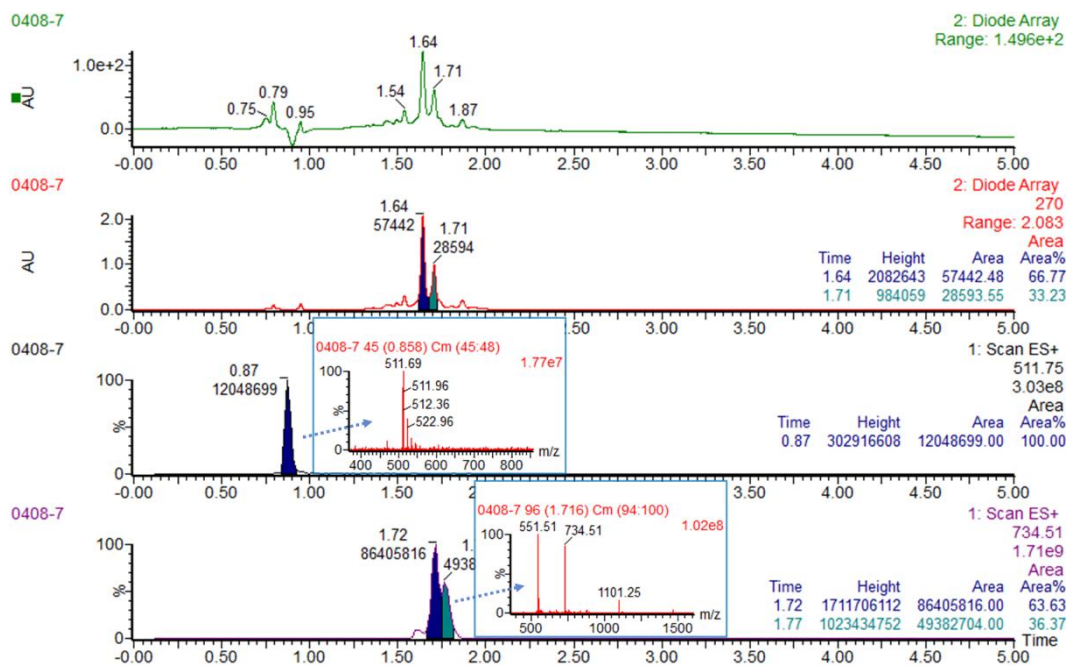

**Fig S153.** UPLC-MS chromatogram of L11 and 3,6-DCT reaction mixture including TIC, UV curves (full-wavelength and extracted at 270 nm) and ESI-MS spectrum. Extract mass chromatograms from full scan data. The yield of the corresponding cyclodimerization products was determined to be 43% using equation 1.

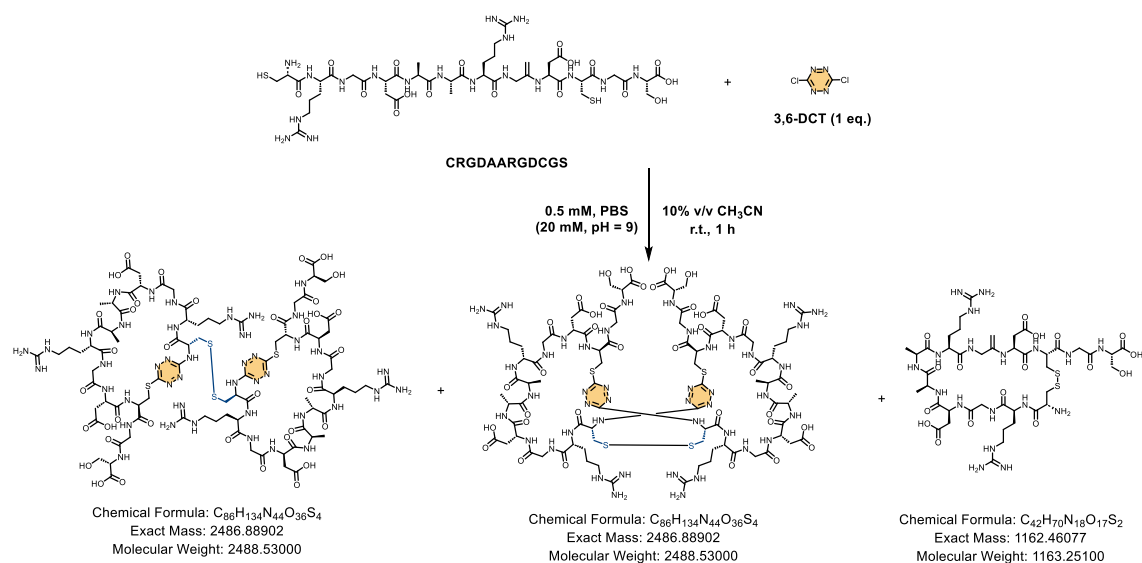

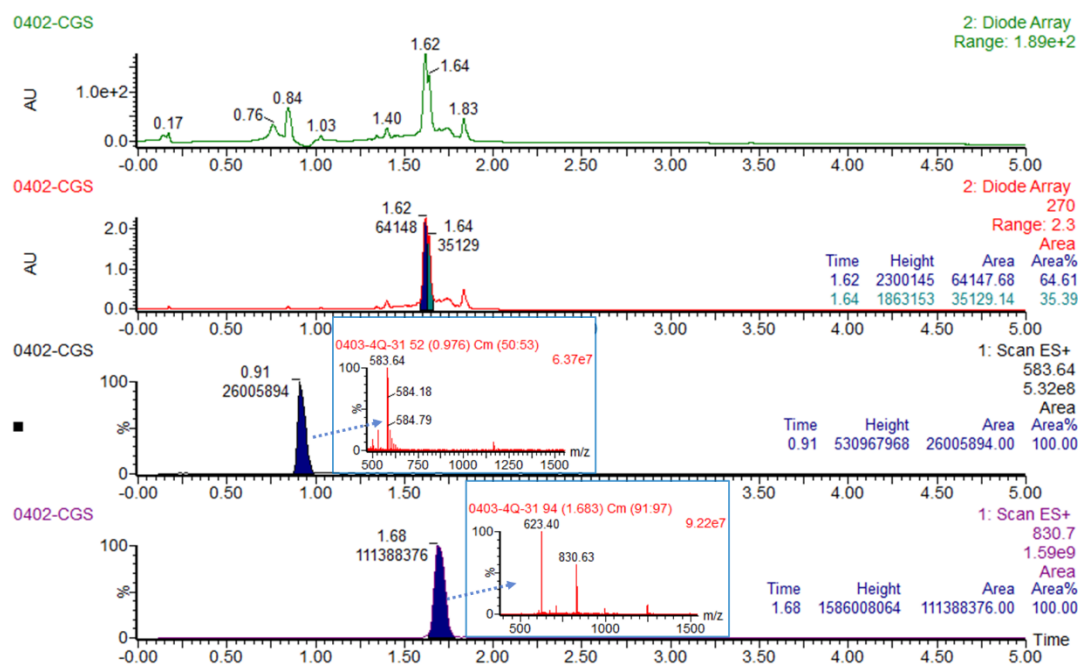

**Fig S154.** UPLC-MS chromatogram of L18 and 3,6-DCT reaction mixture including TIC, UV curves (full-wavelength and extracted at 270 nm) and ESI-MS spectrum. Extract mass chromatograms from full scan data. The yield of the corresponding cyclodimerization products was determined to be 50% using equation 1.

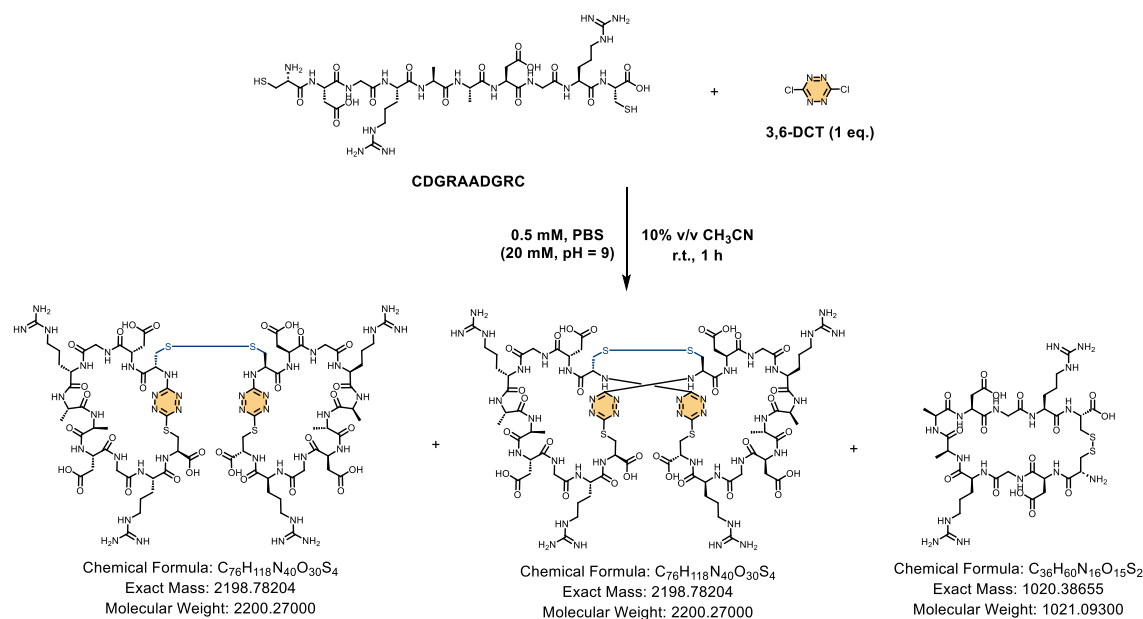



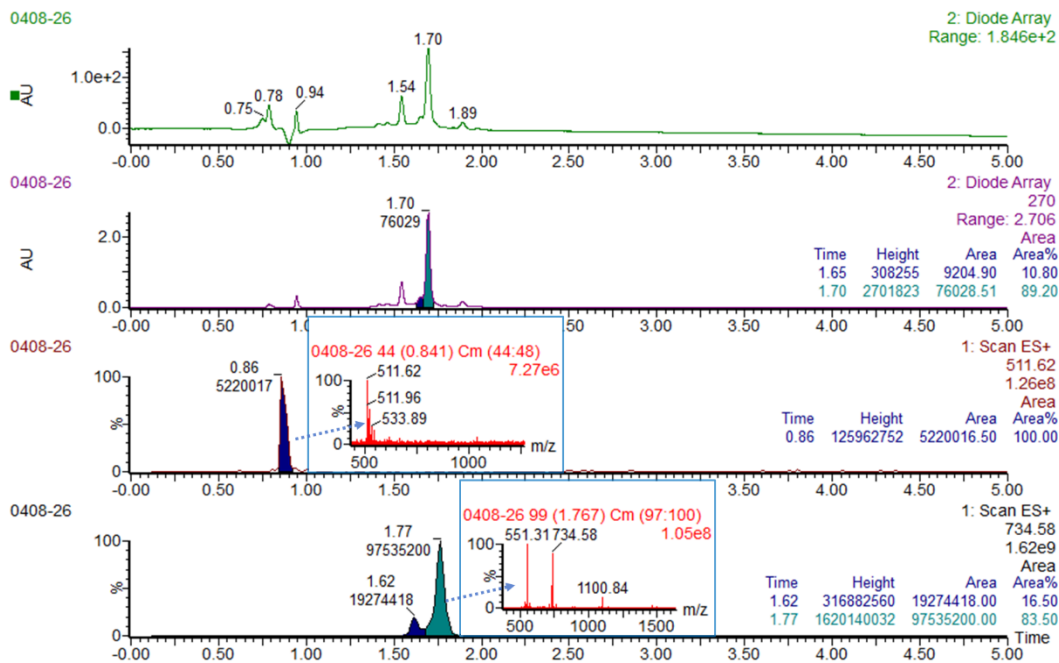

**Fig S156.** UPLC-MS chromatogram of L22 and 3,6-DCT reaction mixture including TIC, UV curves (full-wavelength and extracted at 270 nm) and ESI-MS spectrum. Extract mass chromatograms from full scan data. The yield of the corresponding cyclodimerization products was determined to be 39% using equation 1.

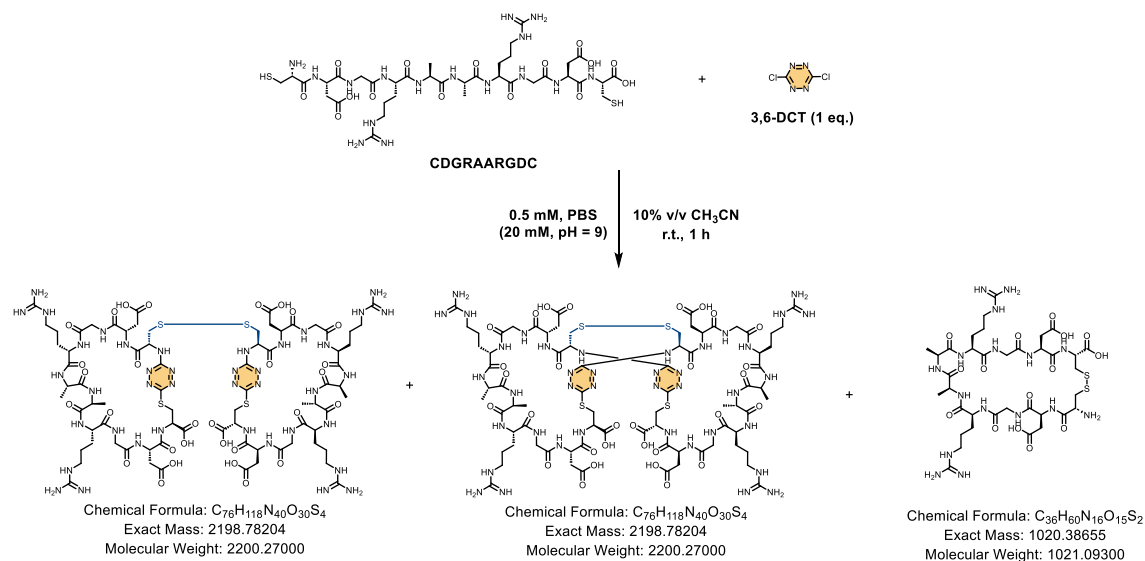

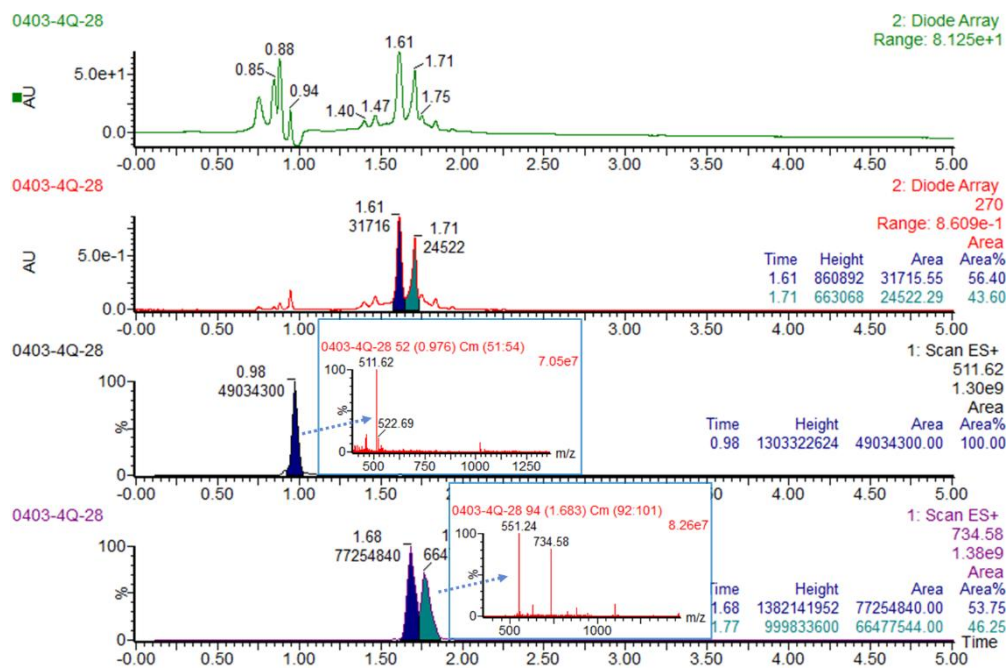

**Fig S157.** UPLC-MS chromatogram of L23 and 3,6-DCT reaction mixture including TIC, UV curves (full-wavelength and extracted at 270 nm) and ESI-MS spectrum. Extract mass chromatograms from full scan data. The yield of the corresponding cyclodimerization products was determined to be 27% using equation 1.

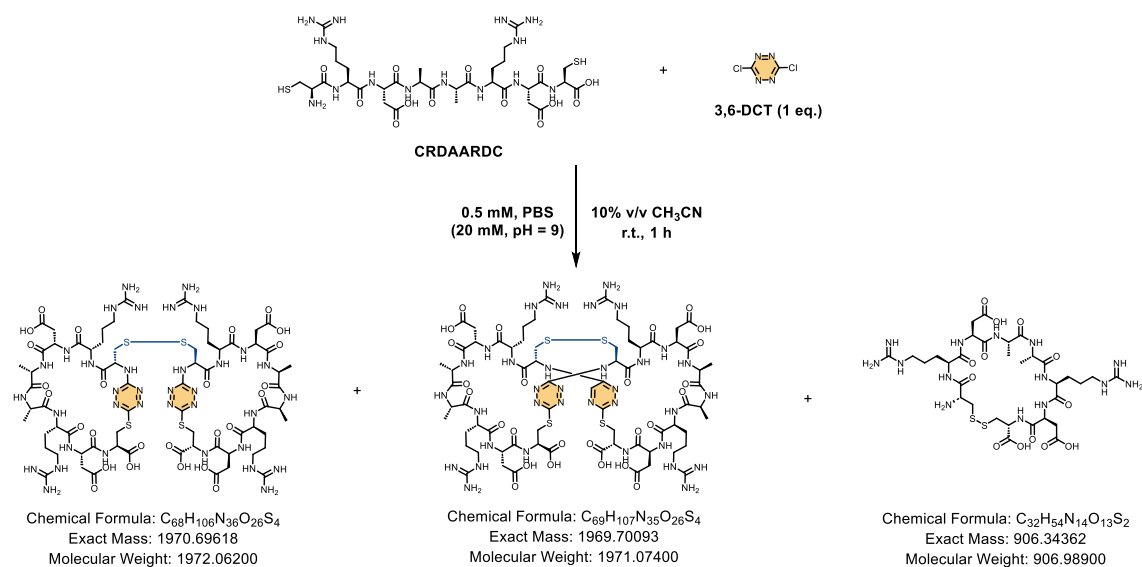



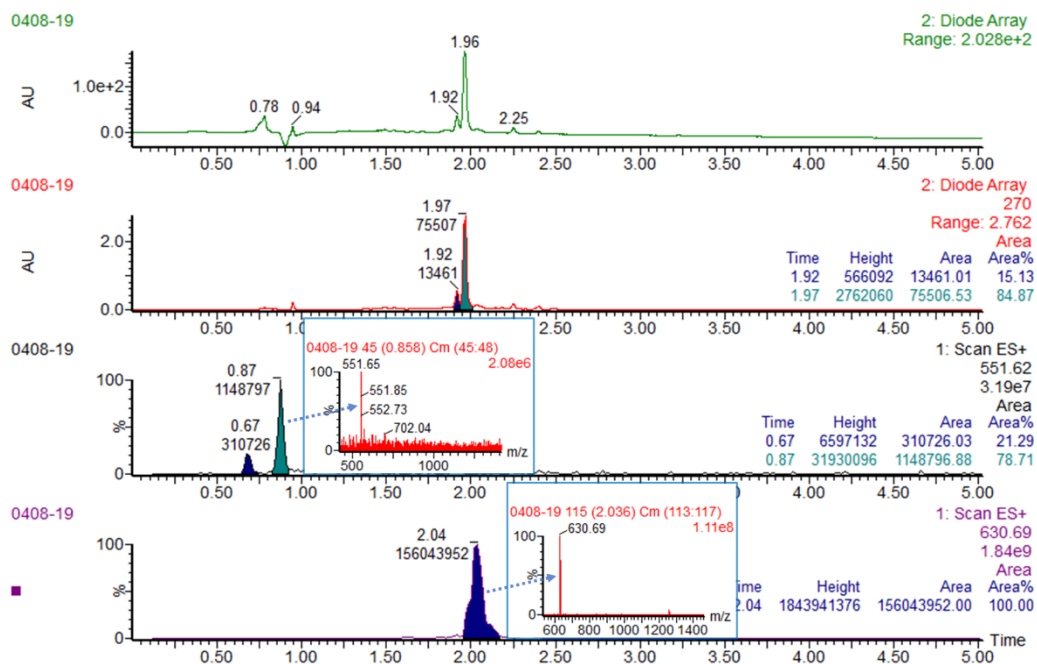

**Fig S159.** UPLC-MS chromatogram of L25 and 3,6-DCT reaction mixture including TIC, UV curves (full-wavelength and extracted at 270 nm) and ESI-MS spectrum. Extract mass chromatograms from full scan data. The yield of the corresponding cyclodimerization products was determined to be 44% using equation 1.

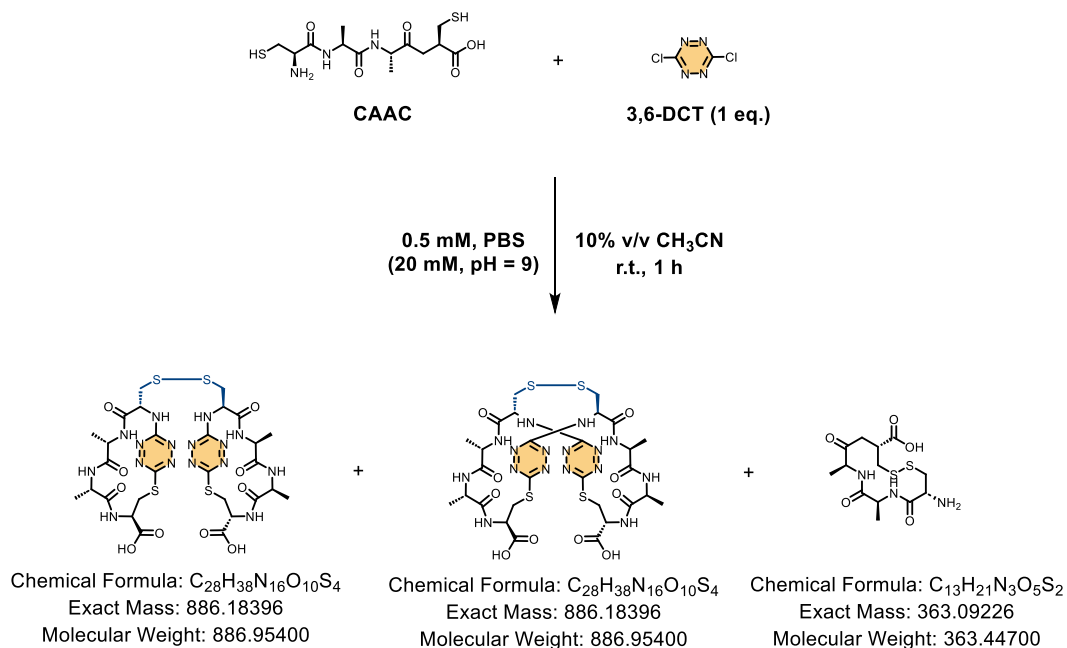

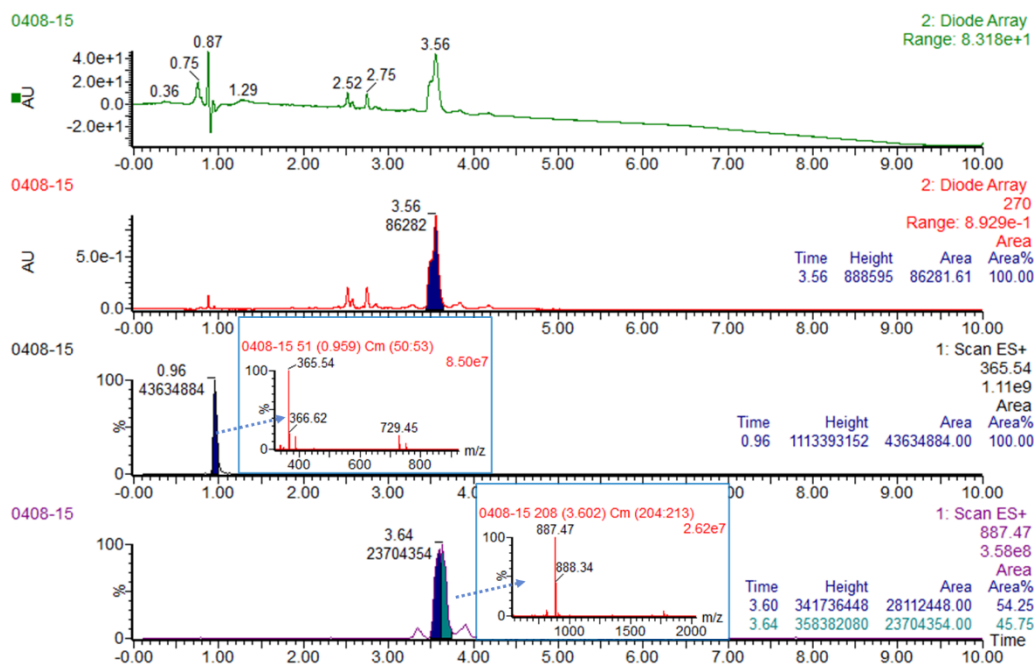

**Fig S160.** UPLC-MS chromatogram of L26 and 3,6-DCT reaction mixture including TIC, UV curves (full-wavelength and extracted at 270 nm) and ESI-MS spectrum. Extract mass chromatograms from full scan data. The yield of the corresponding cyclodimerization products was determined to be 43% using equation 1.

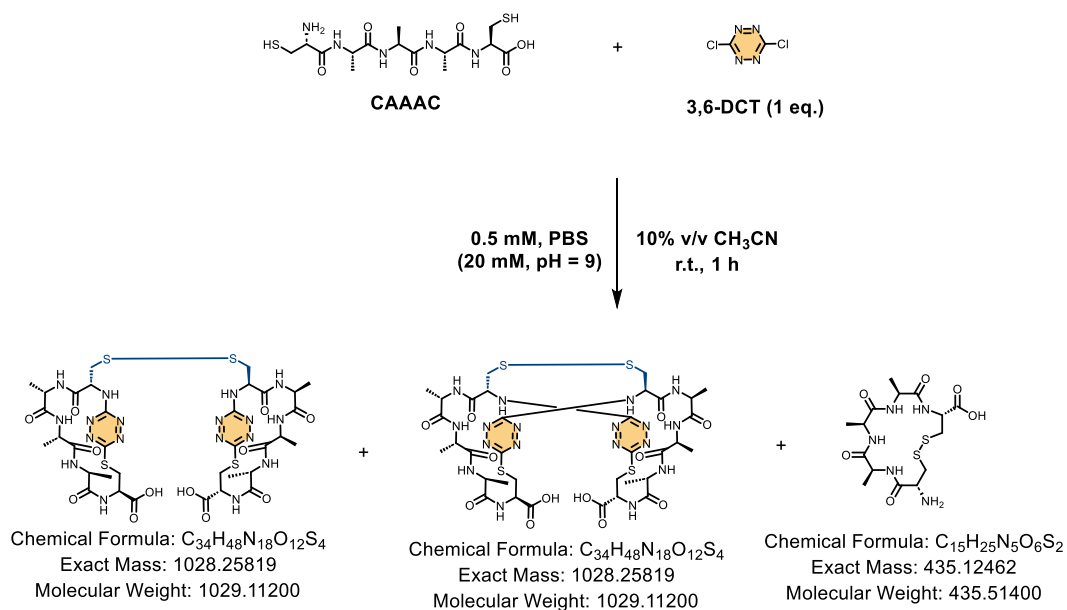



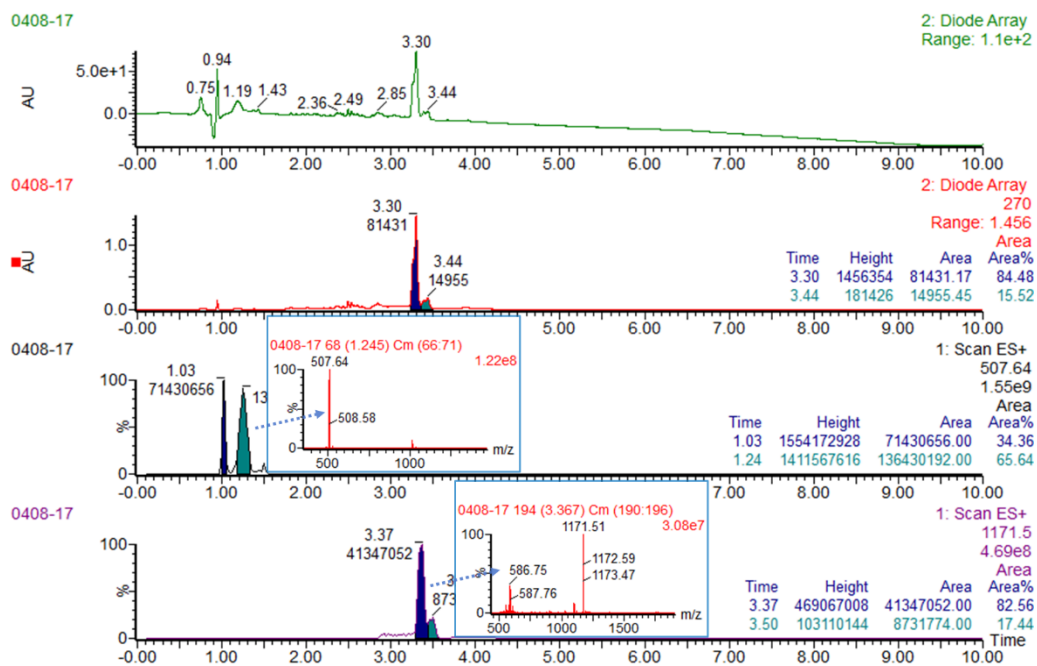

**Fig S162.** UPLC-MS chromatogram of L28 and 3,6-DCT reaction mixture including TIC, UV curves (full-wavelength and extracted at 270 nm) and ESI-MS spectrum. Extract mass chromatograms from full scan data. The yield of the corresponding cyclodimerization products was determined to be 48% using equation 1.

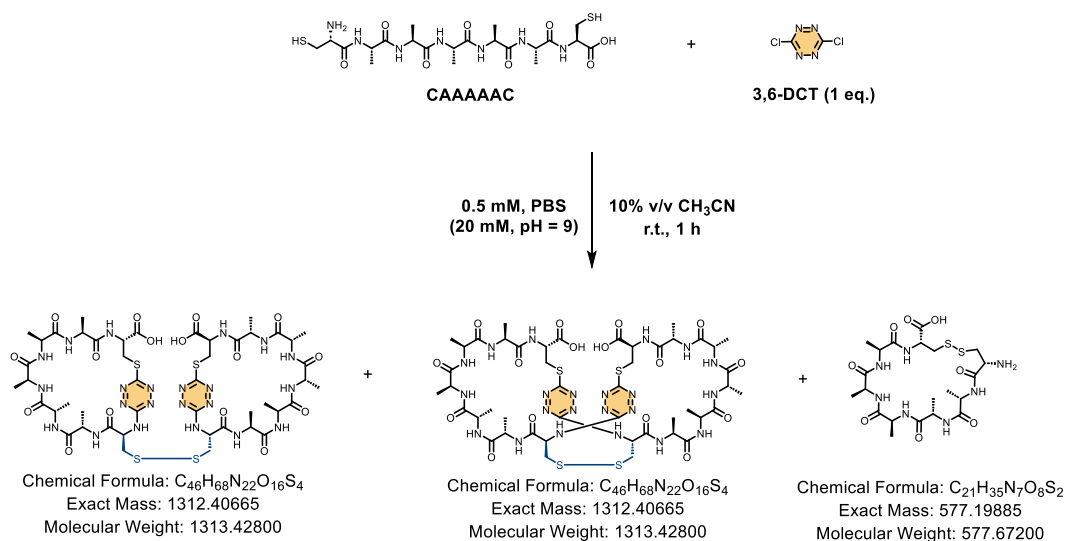

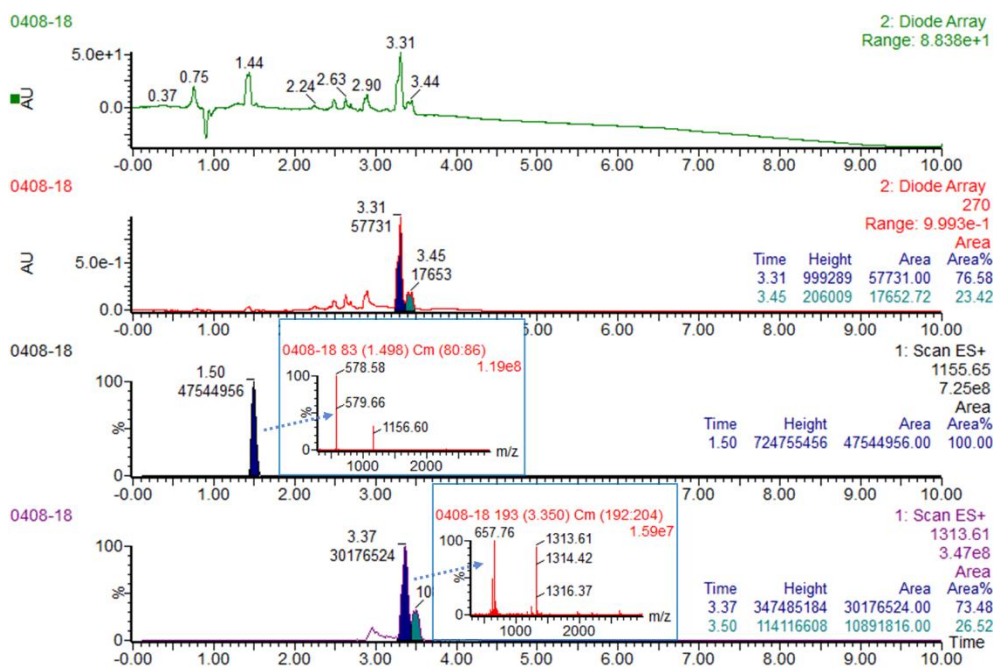

**Fig S163.** UPLC-MS chromatogram of L29 and 3,6-DCT reaction mixture including TIC, UV curves (full-wavelength and extracted at 270 nm) and ESI-MS spectrum. Extract mass chromatograms from full scan data. The yield of the corresponding cyclodimerization products was determined to be 37% using equation 1.

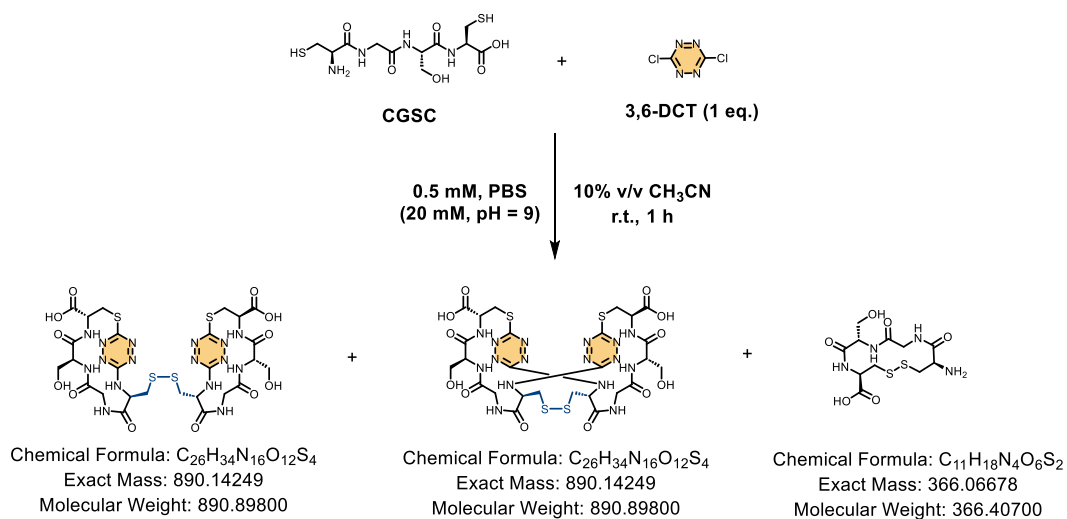



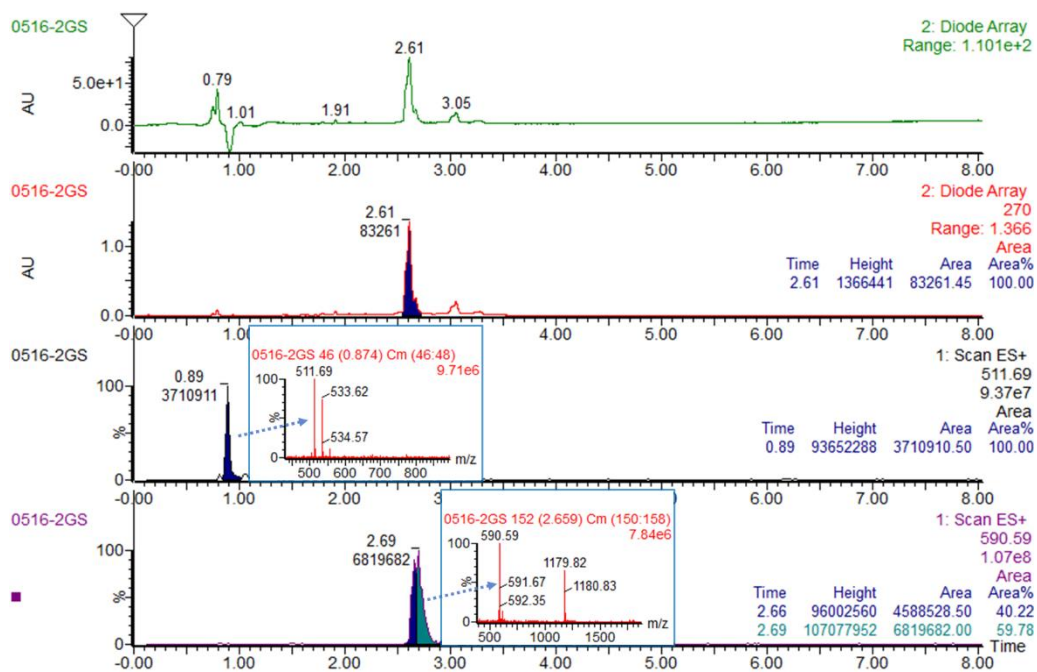

**Fig S165.** UPLC-MS chromatogram of L31 and 3,6-DCT reaction mixture including TIC, UV curves (full-wavelength and extracted at 270 nm) and ESI-MS spectrum. Extract mass chromatograms from full scan data. The yield of the corresponding cyclodimerization products was determined to be 41% using equation 1.

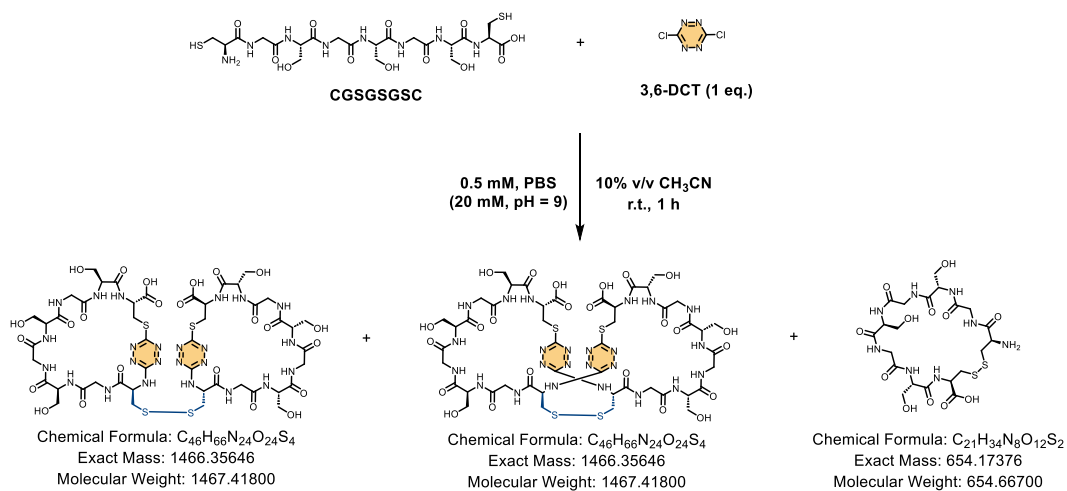



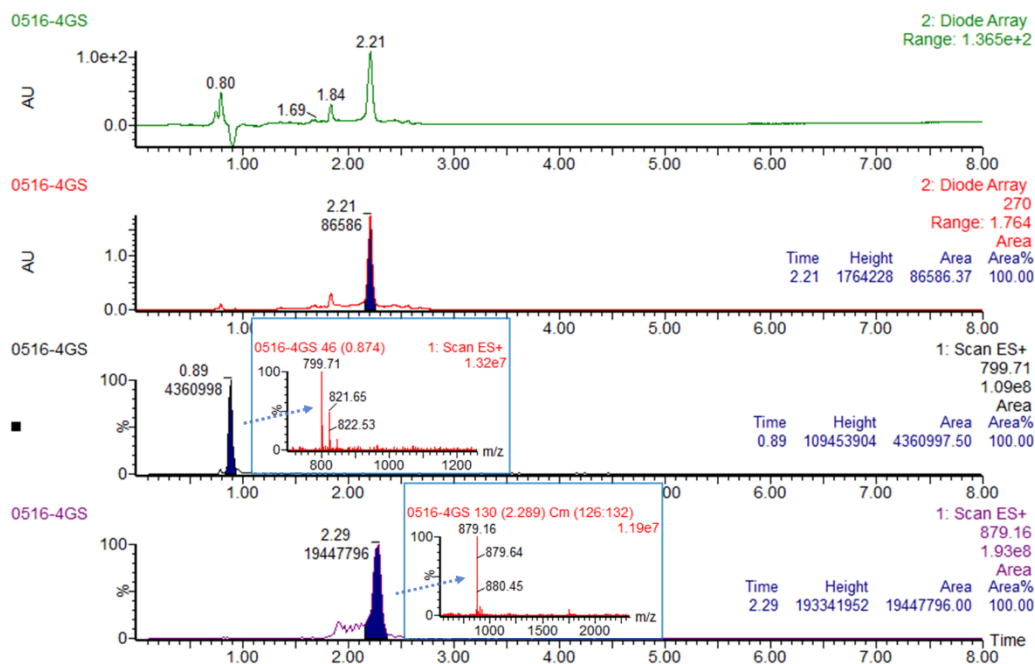

**Fig S167.** UPLC-MS chromatogram of **L33** and 3,6-DCT reaction mixture including TIC, UV curves (full-wavelength and extracted at 270 nm) and ESI-MS spectrum. Extract mass chromatograms from full scan data. The yield of the corresponding cyclodimerization products was determined to be 43% using equation 1.

## 6.2 Calculation of LC-MS yield of monocyclic products

### (1) Construction of LC-MS-based yield calculation method using the standard monocyclic products

The dried peptide substrate with **L2**, was dissolved in appropriate amount of PBS (20 mM, pH = 9.0) to reach a concentration of 0.56 mM. To this solution, 3,6-DCT (1.0 equiv.) dissolved in acetonitrile (1/9 of the volume of buffer) was added. The final concentrations in the reaction were 0.5 mM peptide, 0.5 mM 3,6-DCT and 10% acetonitrile, followed by thorough mixing. The reaction mixture was shaken at 25 °C and 800 rpm for 1 h on a thermostatic shaker, and the standard monocyclic products was obtained after purification by HPLC.

The lyophilized products, standard monocyclic products (**M2-tz**) were dissolved in H<sub>2</sub>O to prepare standard solutions of different concentrations. Under the conditions of Method A, 10 μL of each solution were injected into the LC-MS in equal volumes. Considering that all monocyclic products with Tz have a 285nm characteristic absorption peak, MassLynx V4.2 software was used to integrate the peak area at 285nm

for calibration curve calculation.

**Tab S11** The LC-MS data for M2-tz at different concentrations

| Entry | Concentration of M2-tz | Peak area of M2-tz in 285 nm |
|-------|------------------------|------------------------------|
| 1     | 0.0625 mM              | 14934                        |
| 2     | 0.125 mM               | 35214                        |
| 3     | 0.25 mM                | 76467                        |
| 4     | 0.5 mM                 | 139326                       |
| 5     | 1 mM                   | 273801                       |

A high-precision calibration curve was established within the linear dynamic range of 0.0625 mM to 1.0 mM (5 points), where the UV detector exhibited an excellent linear response:  $y = 273146x + 2105$  ( $R^2 = 0.9987$ )

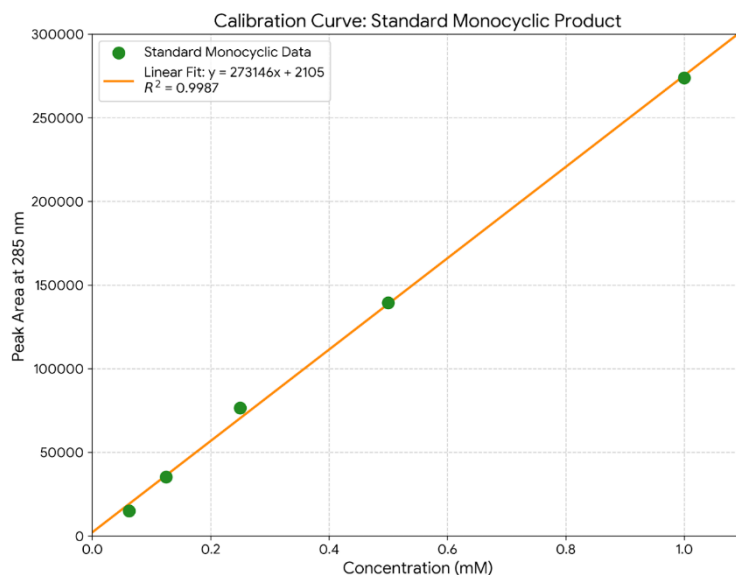

**Fig S168.** Calibration curve of purified M2-tz (0.0625–0.25 mM) at 285 nm,  $y = 273146x + 2105$  ( $R^2 = 0.9987$ )

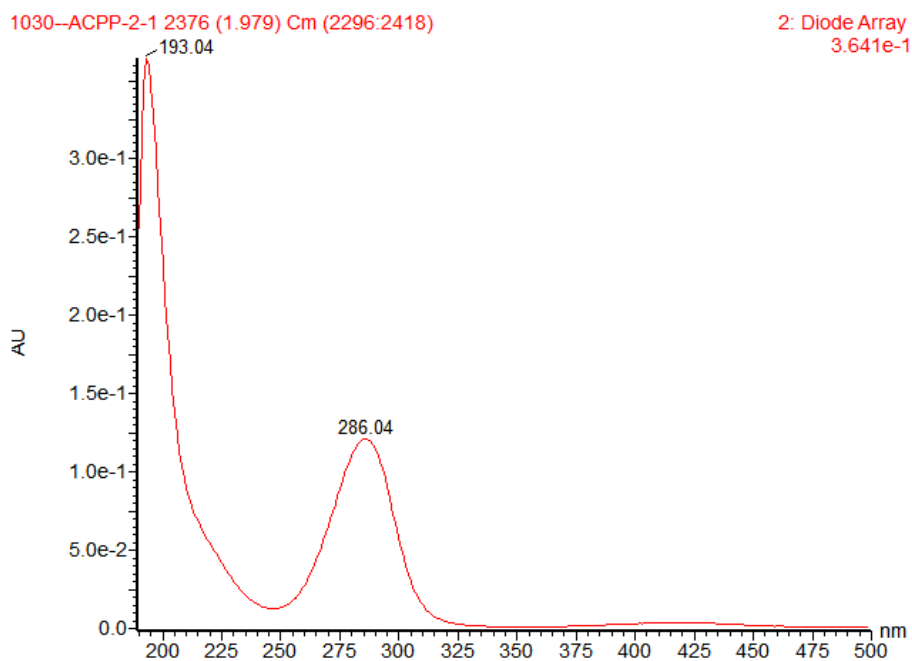

Fig S169. The UV characteristic absorption of M2-tz.

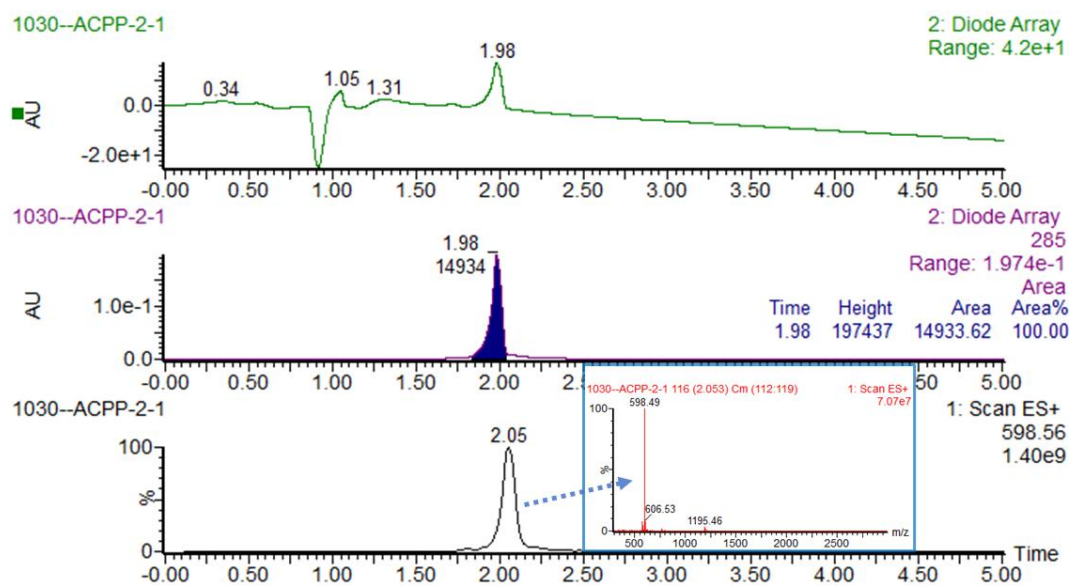

Fig S170. LC-MS for M2-tz (0.0625 mM) including TIC, UV curves (full-wavelength and extracted at 285 nm) and ESI-MS spectrum. Extract mass chromatograms from full scan data.

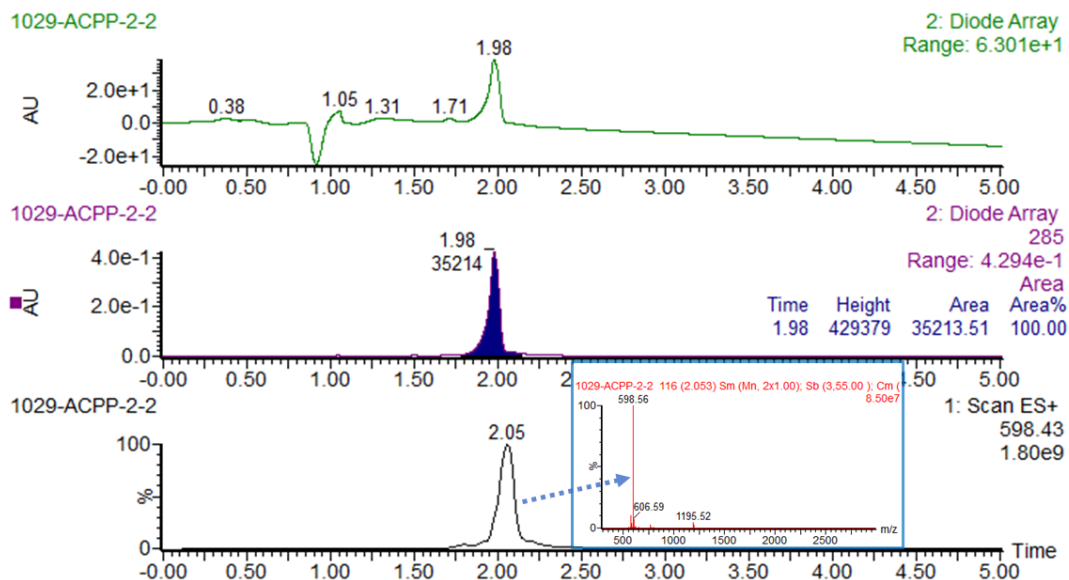

**Fig S171.** LC-MS for **M2-tz** (0.125 mM) including TIC, UV curves (full-wavelength and extracted at 285 nm) and ESI-MS spectrum. Extract mass chromatograms from full scan data.

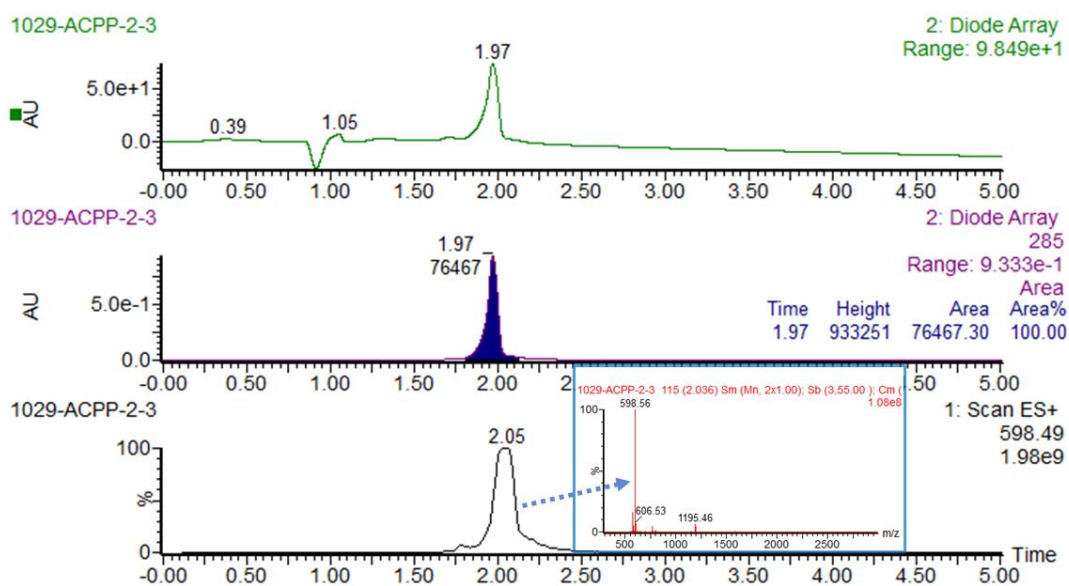

**Fig S172** LC-MS for **M2-tz** (0.25 mM) including TIC, UV curves (full-wavelength and extracted at 285 nm) and ESI-MS spectrum. Extract mass chromatograms from full scan data.

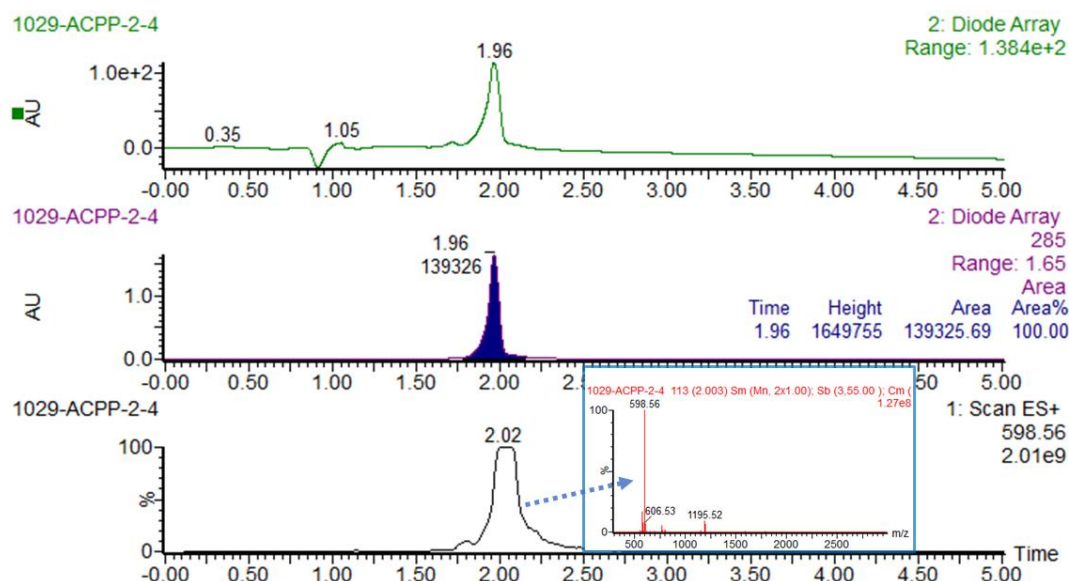

**Fig S173** LC-MS for **M2-tz** (0.5 mM) including TIC, UV curves (full-wavelength and extracted at 285 nm) and ESI-MS spectrum. Extract mass chromatograms from full scan data.

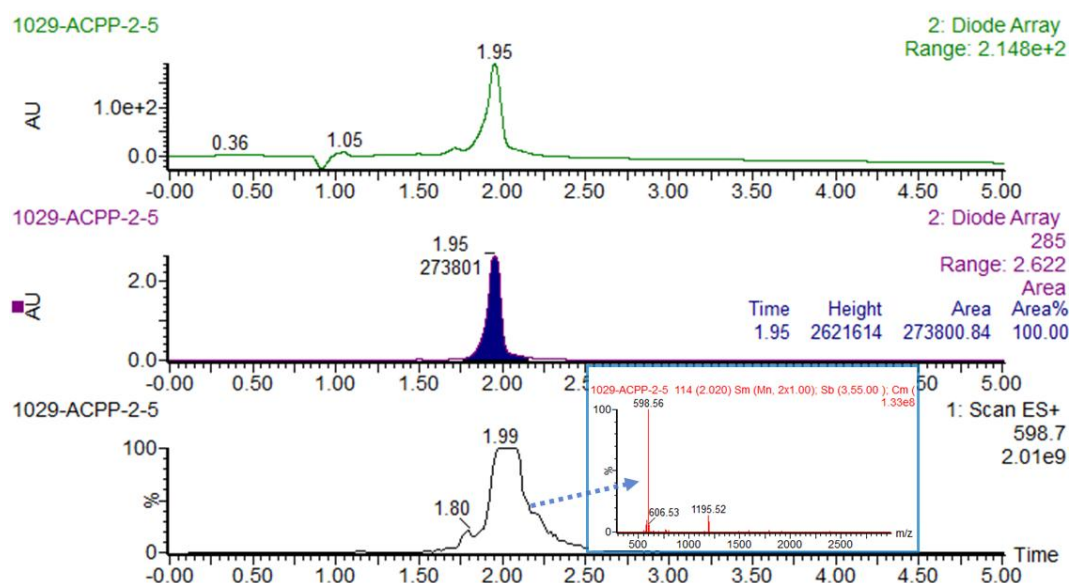

**Fig S174** LC-MS for **M2-tz** (1 mM) including TIC, UV curves (full-wavelength and extracted at 285 nm) and ESI-MS spectrum. Extract mass chromatograms from full scan data.

## (2) Calculation Equation

The peak area recorded at 285 nm was converted into concentration using the linear regression equation derived from the calibration curve.

### Equation 3:

$$\text{Yield (\%)} = \frac{(A_{\text{sample}} - 2105)/273146}{C_{\text{theoretical}}} \times 100\%$$

Where  $A_{\text{sample}}$  is the measured peak area at 285 nm.  $C_{\text{theoretical}}$  is the theoretical maximum

concentration of the monocyclic product.

### 6.3 Reaction of peptides without N-Cys

The dried peptide substrate without N-Cys (1.0 equiv.), such as Ac-CRGDAARGDC (**L12**), was dissolved in appropriate amount of PBS (20 mM, pH = 9.0) to reach a concentration of 0.56 mM. To this solution, 3,6-DCT (1.0 equiv.) dissolved in acetonitrile (1/9 of the volume of buffer) was added. The final concentrations in the reaction were 0.5 mM peptide, 0.5 mM 3,6-DCT and 10% acetonitrile, followed by thorough mixing. The reaction mixture was shaken at 25 °C and 800 rpm for 1 h on a thermostatic shaker.

After completion, 50  $\mu$ L of the reaction mixture was collected, and 10  $\mu$ L was injected into the UPLC-MS for analysis. The peak area of the monocyclic products at 285 nm was recorded. Determine the LC-MS yield using **Equation 3**. Detailed data are shown in **Table S12**.

**Tab S12. The LC-MS data for peptides without N-Cys using Method A**

| Peptide sequence | Peak area | HPLC Yield (%) <sup>[a]</sup> |
|------------------|-----------|-------------------------------|
| Ac-CRGDAARGDC    | 72473     | 51.53                         |
| Ac-CRGDGGRGDC    | 81956     | 58.47                         |
| Ac-CRGDpPRGDC    | 89435     | 63.95                         |
| Ac-CRGDNGRGDC    | 69616     | 49.43                         |
| Ac-CRGDPGRGDC    | 93140     | 66.66                         |
| Ac-CRGDAibPRGDC  | 75115     | 53.46                         |
| Ac-CRGDAibGRGDC  | 86529     | 61.82                         |
| GSCRGDAARGDC     | 41071     | 28.53                         |
| GSCRGDAARGDCGS   | 51119     | 35.89                         |

[a] Yields were determined by LC-MS analysis using **Equation 3**

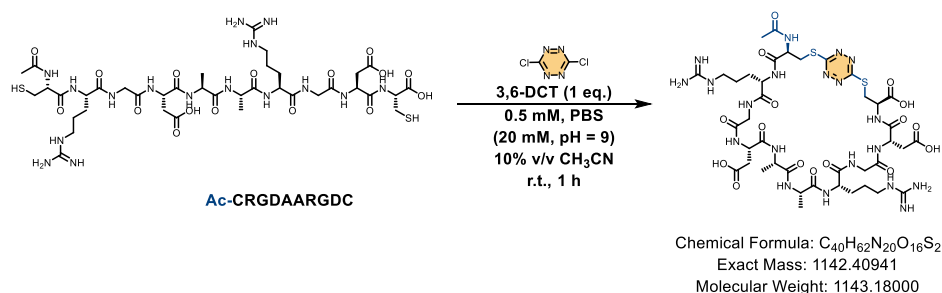

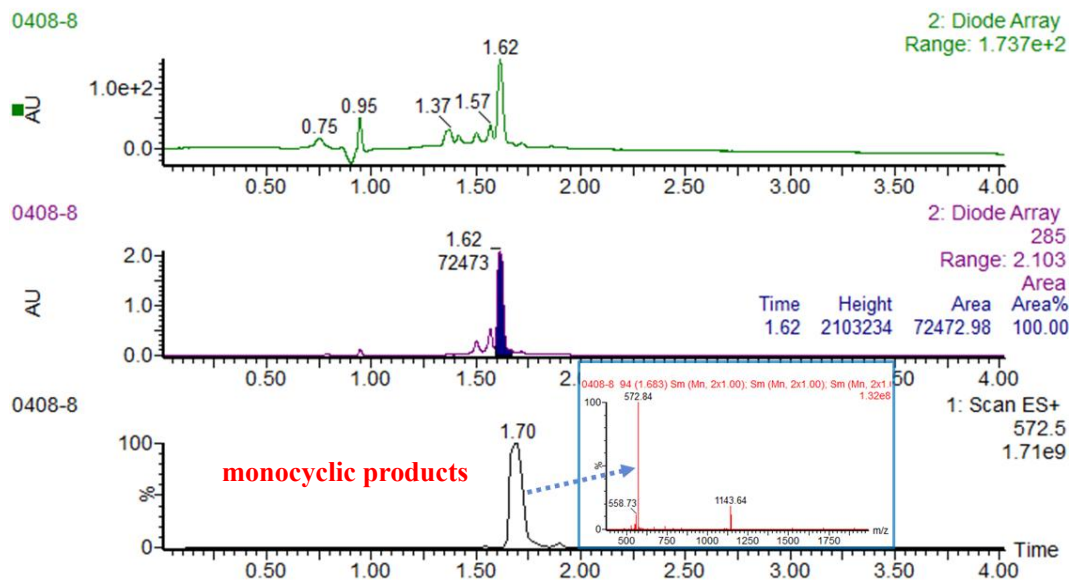

**Fig S175.** UPLC-MS chromatogram of L12 and 3,6-DCT reaction mixture including TIC, UV curves (full-wavelength and extracted at 285 nm) and ESI-MS spectrum. Extract mass chromatograms from full scan data. The yield of the corresponding monocyclic products was determined to be 52% using Equation 3.

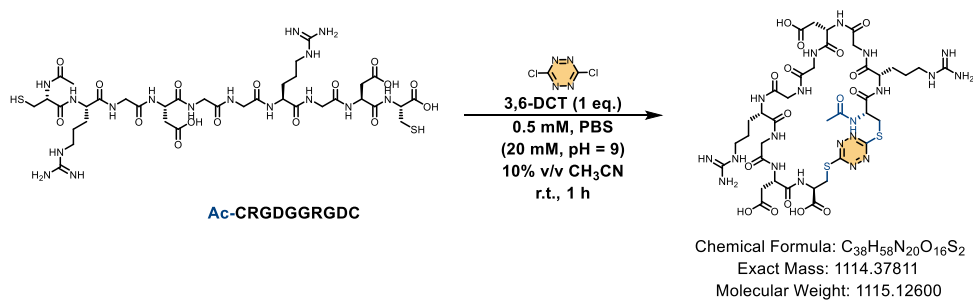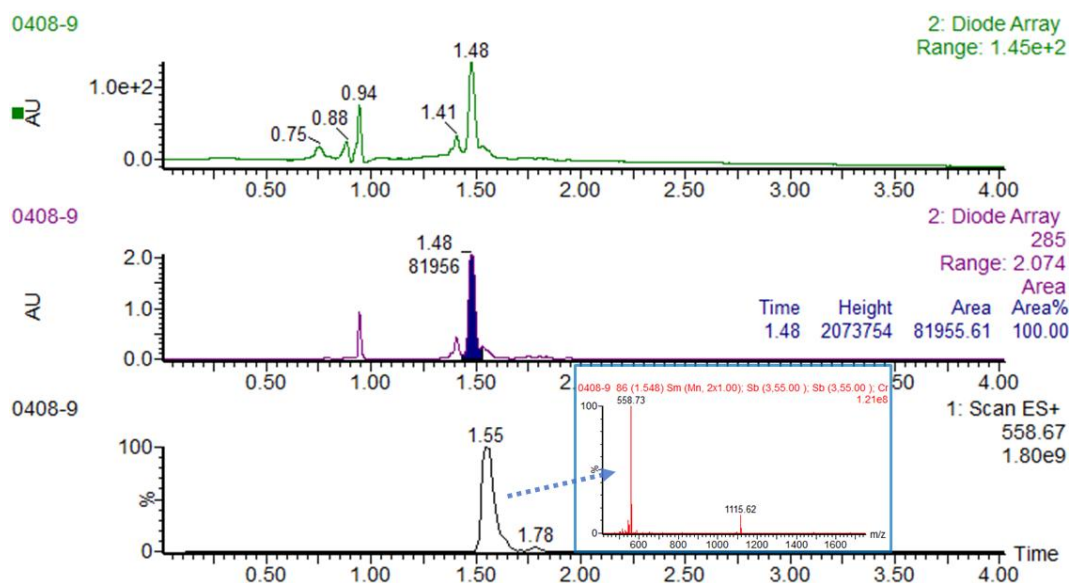

**Fig S176.** UPLC-MS chromatogram of **L13** and 3,6-DCT reaction mixture including TIC, UV curves (full-wavelength and extracted at 285 nm) and ESI-MS spectrum. Extract mass chromatograms from full scan data. The yield of the corresponding monocyclic products was determined to be 58% using Equation 3.

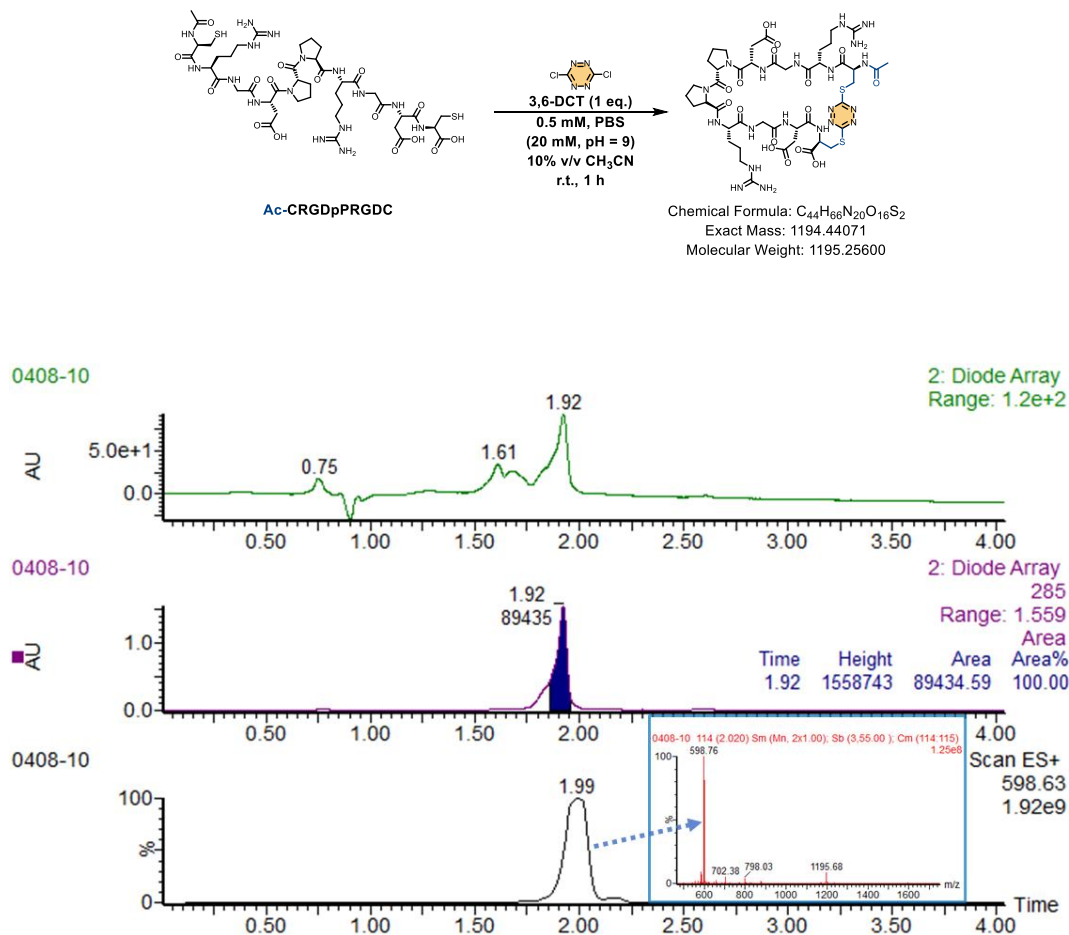

**Fig S177.** UPLC-MS chromatogram of **L2** and 3,6-DCT reaction mixture including TIC, UV curves (full-wavelength and extracted at 285 nm) and ESI-MS spectrum. Extract mass chromatograms from full scan data. The yield of the corresponding monocyclic products was determined to be 64% using Equation 3.

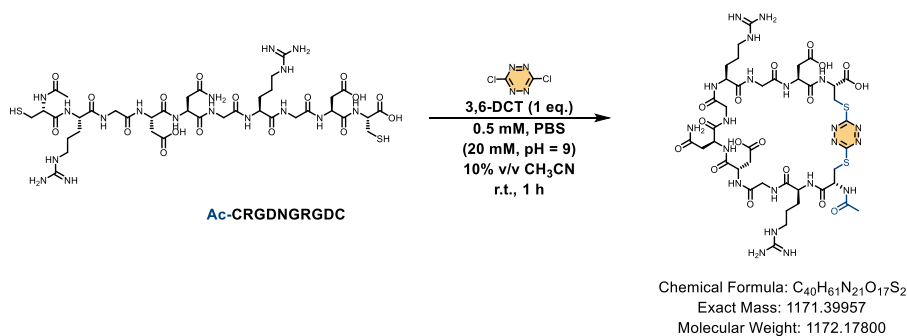



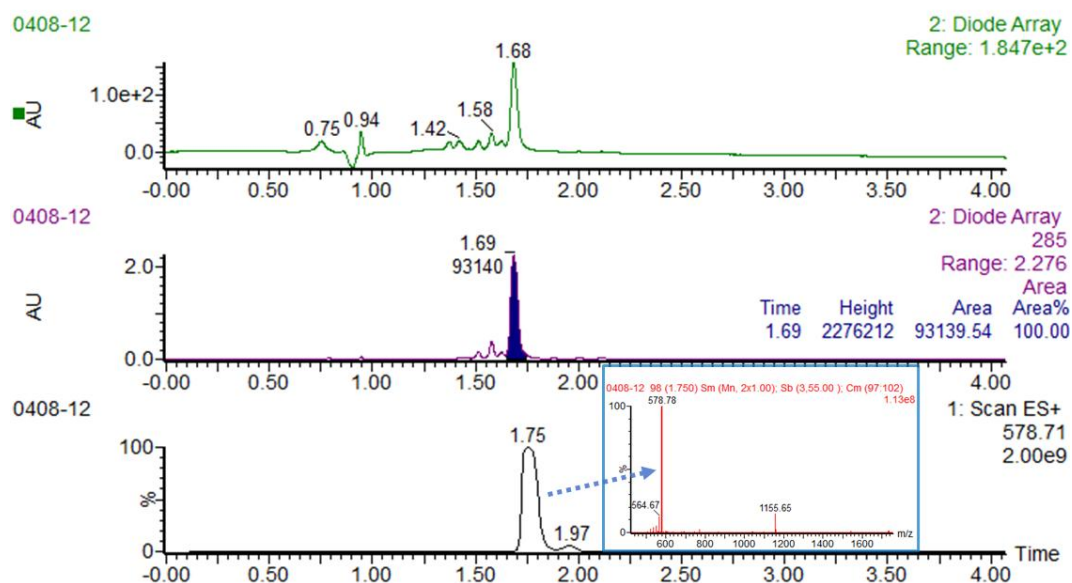

**Fig S179.** UPLC-MS chromatogram of L15 and 3,6-DCT reaction mixture including TIC, UV curves (full-wavelength and extracted at 285 nm) and ESI-MS spectrum. Extract mass chromatograms from full scan data. The yield of the corresponding monocyclic products was determined to be 67% using Equation 3.

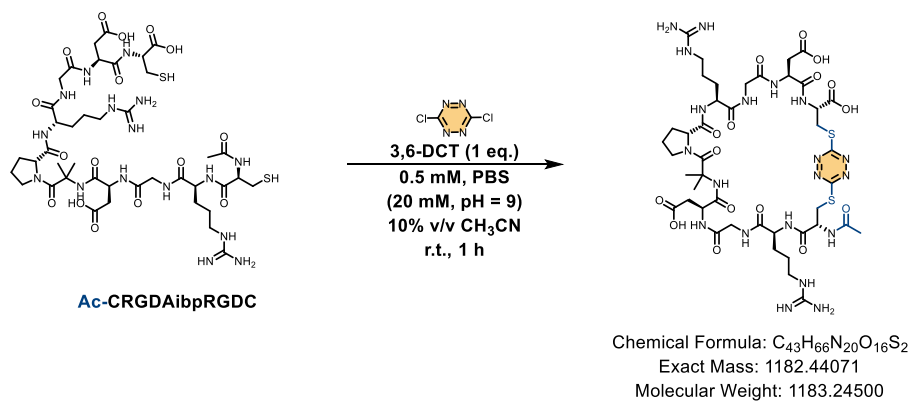

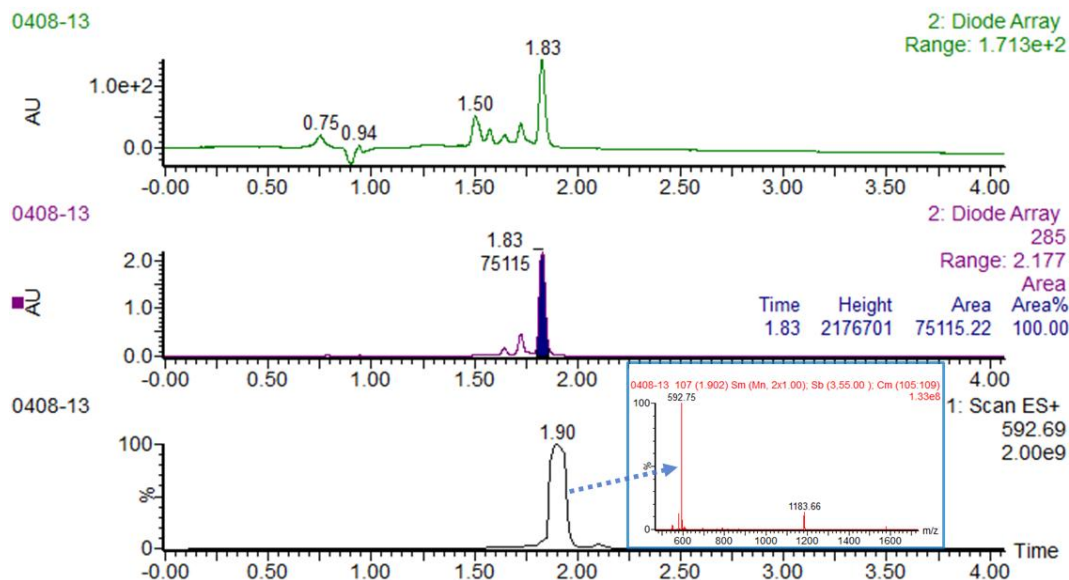

**Fig S180.** UPLC-MS chromatogram of L16 and 3,6-DCT reaction mixture including TIC, UV curves (full-wavelength and extracted at 285 nm) and ESI-MS spectrum. Extract mass chromatograms from full scan data. The yield of the corresponding monocyclic products was determined to be 53% using Equation 3.

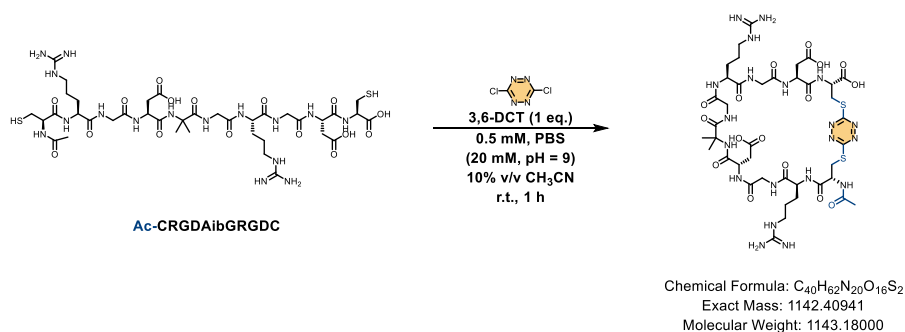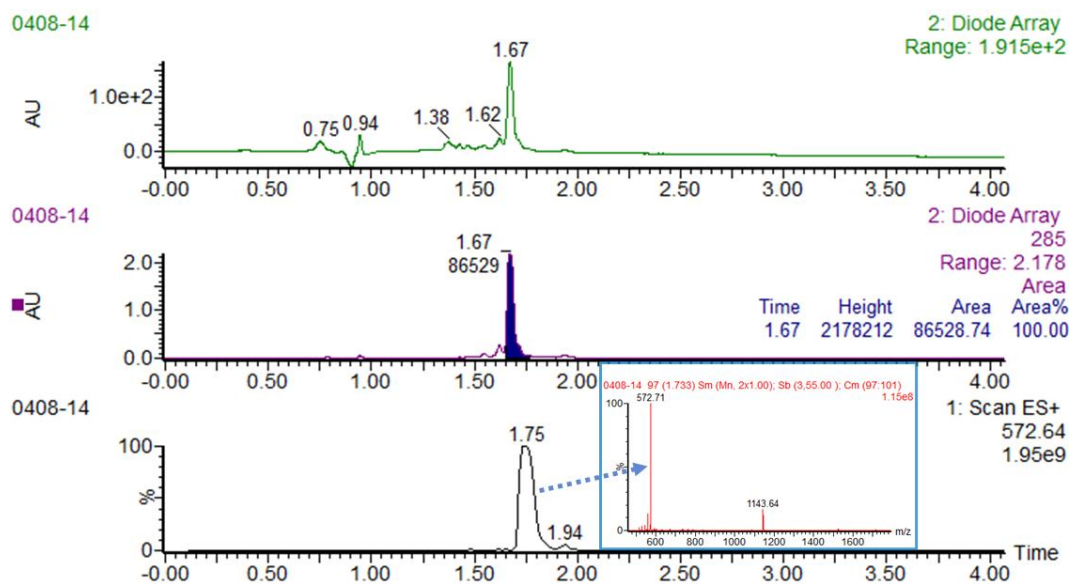

**Fig S181.** UPLC-MS chromatogram of L17 and 3,6-DCT reaction mixture including TIC, UV curves (full-wavelength and extracted at 285 nm) and ESI-MS spectrum. Extract mass chromatograms from full scan data. The yield of the corresponding monocyclic products was determined to be 62% using Equation 3.

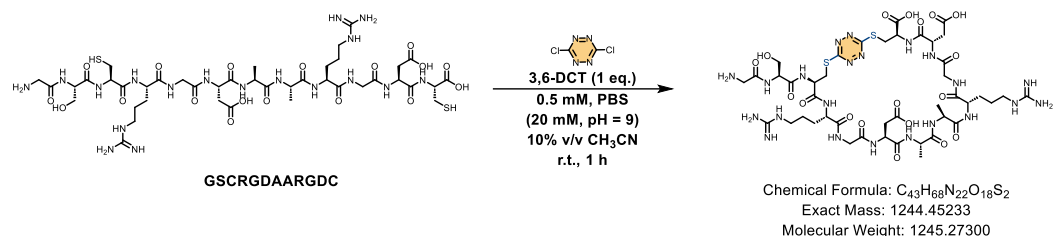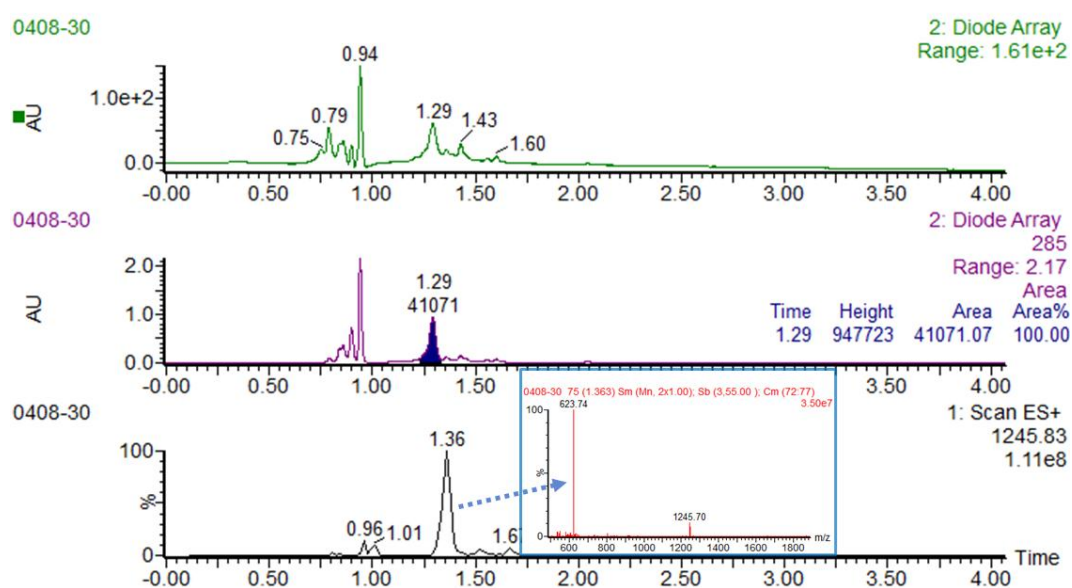

**Fig S182.** UPLC-MS chromatogram of L19 and 3,6-DCT reaction mixture including TIC, UV curves (full-wavelength and extracted at 285 nm) and ESI-MS spectrum. Extract mass chromatograms from full scan data. The yield of the corresponding monocyclic products was determined to be 29% using Equation 3.

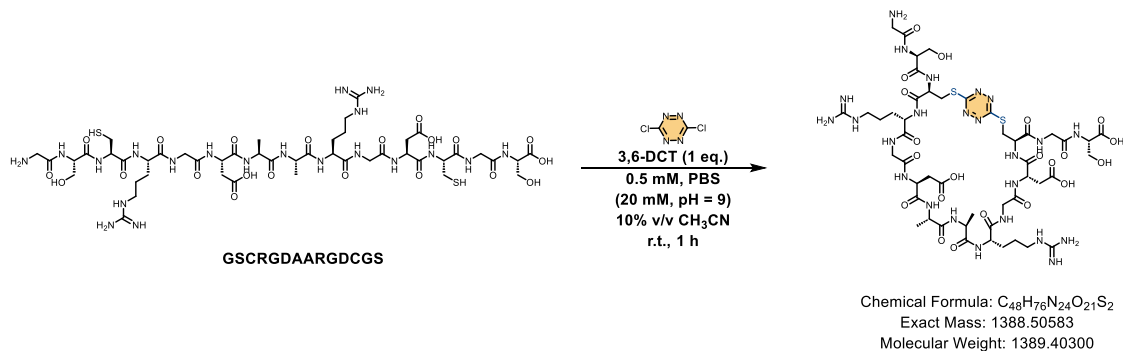

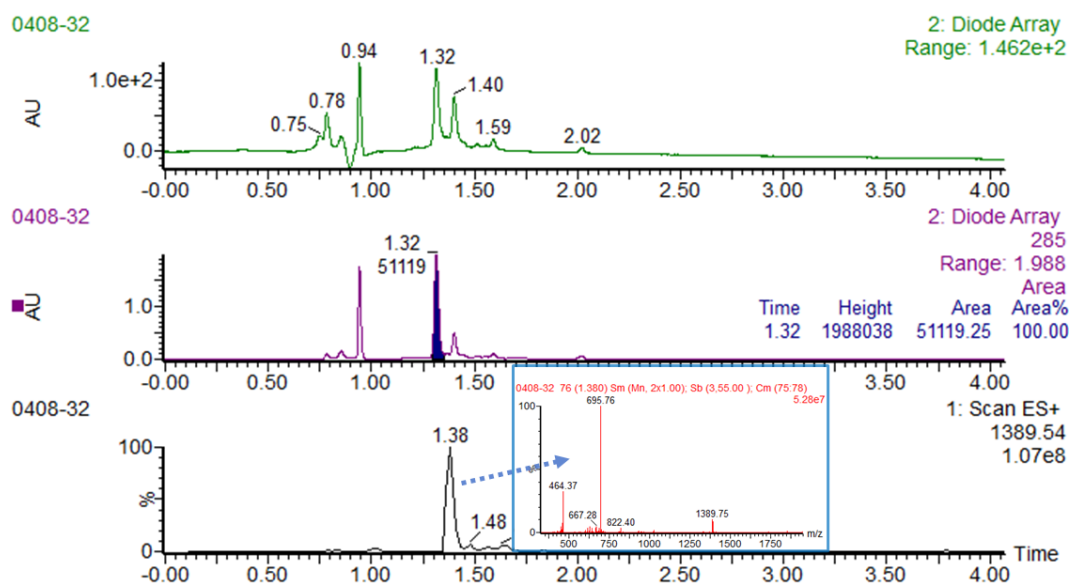

**Fig S183.** UPLC-MS chromatogram of L20 and 3,6-DCT reaction mixture including TIC, UV curves (full-wavelength and extracted at 285 nm) and ESI-MS spectrum. Extract mass chromatograms from full scan data. The yield of the corresponding monocyclic products was determined to be 36% using Equation 3.

## 7. Substrate scope of the 3,6-DCT mediated cyclodimerization reaction

### 7.1 Substrate scope expansion and validation experiment

Various peptide substrates were reacted with 3,6-DCT under the standard reaction conditions (Entry 1). After completion, 50  $\mu\text{L}$  of the reaction mixture was collected, and 10  $\mu\text{L}$  was injected into the UPLC-MS for analysis. The peak area of the cyclodimerization products at 270 nm was recorded. Determine the LC-MS yield using Equation 1. Detailed data are shown in **Table S13**.

**Tab S13.** The LC-MS data for substrate scope collected using Method A

| Peptide | Peak area of cyclodimerization products | Theoretical conc. | HPLC Yield (%) <sup>[a]</sup> |
|---------|-----------------------------------------|-------------------|-------------------------------|
| L34     | 78445                                   | 0.25 mM           | 38.88                         |
| L35     | 86861                                   | 0.25 mM           | 43.37                         |
| L36     | 71283                                   | 0.25 mM           | 35.06                         |
| L37     | 97785                                   | 0.25 mM           | 49.19                         |
| L38     | 78453                                   | 0.25 mM           | 38.88                         |
| L39     | 118490                                  | 0.25 mM           | 60.23                         |
| L40     | 79295                                   | 0.25 mM           | 39.33                         |

|            |       |           |       |
|------------|-------|-----------|-------|
| <b>L41</b> | 94686 | 0.25 mM   | 47.54 |
| <b>L42</b> | 19997 | 0.0625 mM | 30.88 |
| <b>L43</b> | 40644 | 0.125 mM  | 37.45 |

[a]Yields were determined by LC-MS analysis using **Equation 1**

After completion of the 3,6-DCT mediated cyclodimerization reaction, TCEP (10 equiv.) was added to the reaction mixture, and reacted at room temperature for 3h. Then, 50  $\mu$ L of the reaction mixture was collected, and 10  $\mu$ L was injected into the UPLC-MS for analysis.

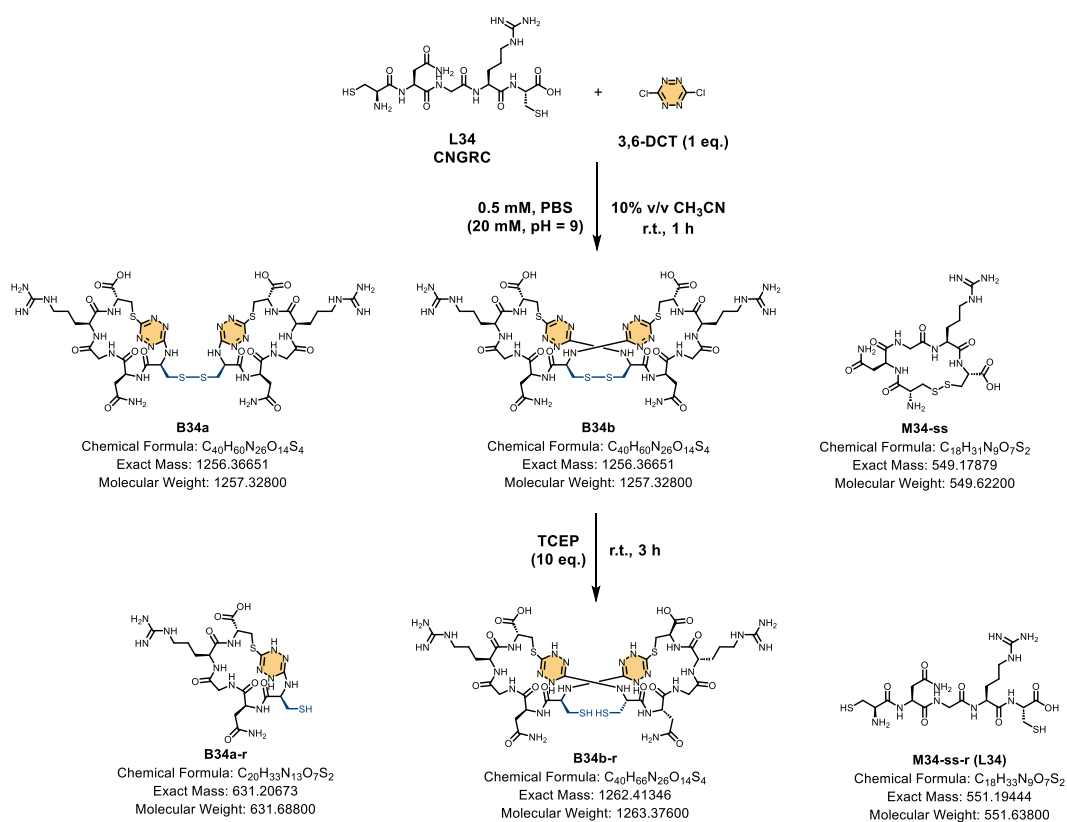

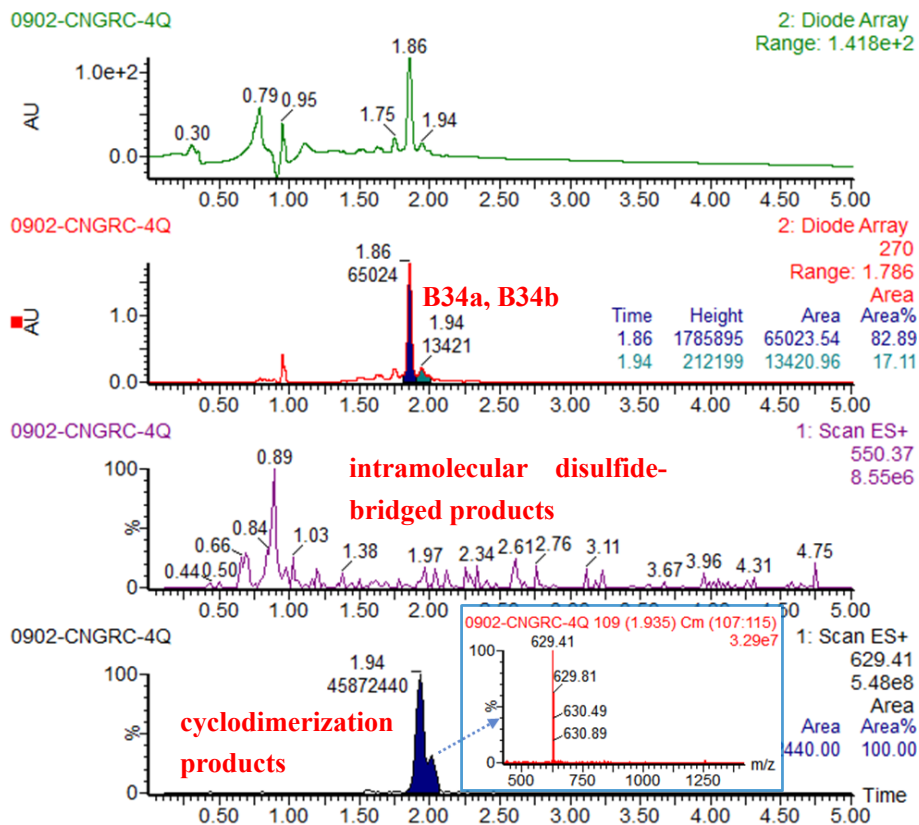

**Fig S184.** UPLC-MS chromatogram of reaction mixture including TIC, UV curves (full-wavelength and extracted at 270 nm) and ESI-MS spectrum of **B34a** and **B34b**. Extract mass chromatograms from full scan data. The yield of cyclodimerization products was determined to be 39% using Equation 1.

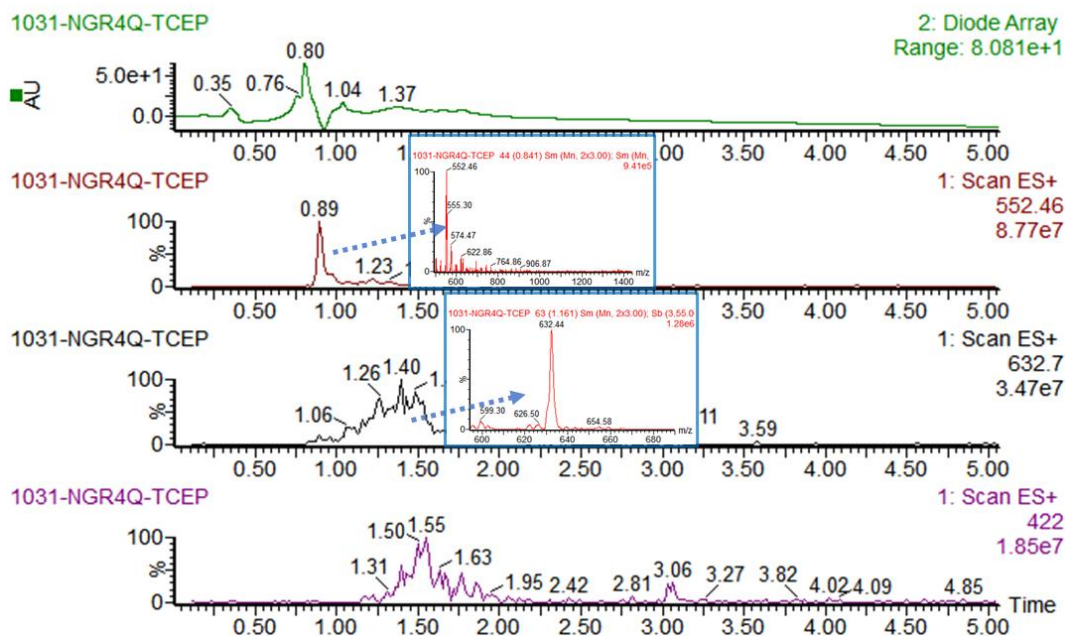

**Fig S185.** UPLC-MS chromatogram of reaction mixture with TCEP including TIC, UV curve (full-wavelength) and ESI-MS spectrum. Extract mass chromatograms from full scan data.

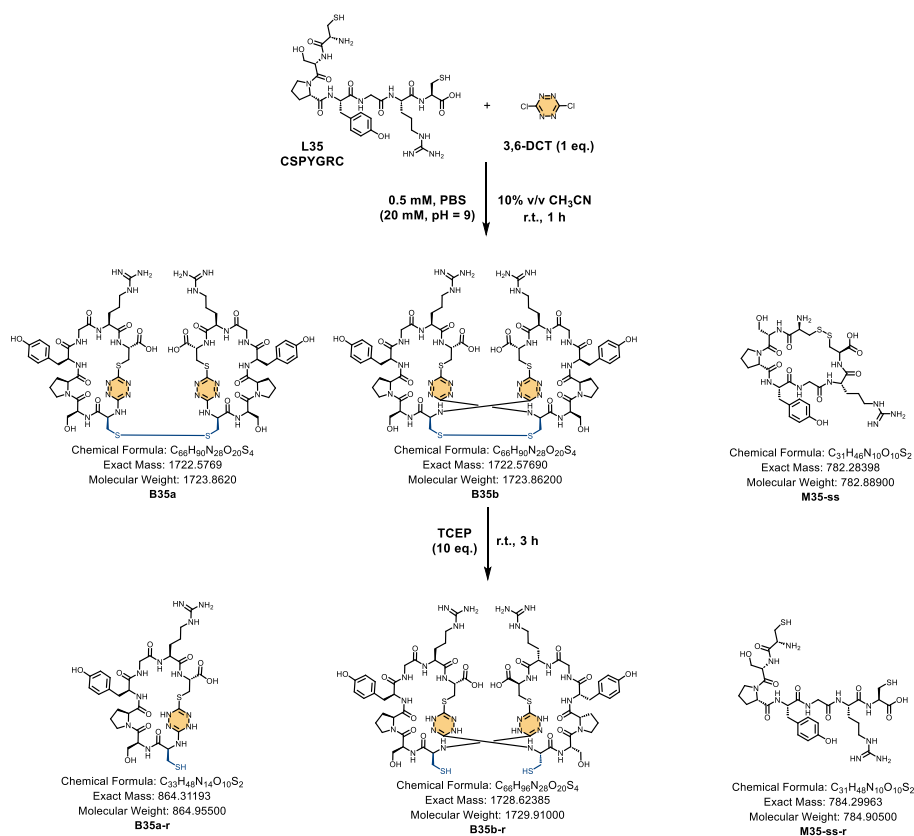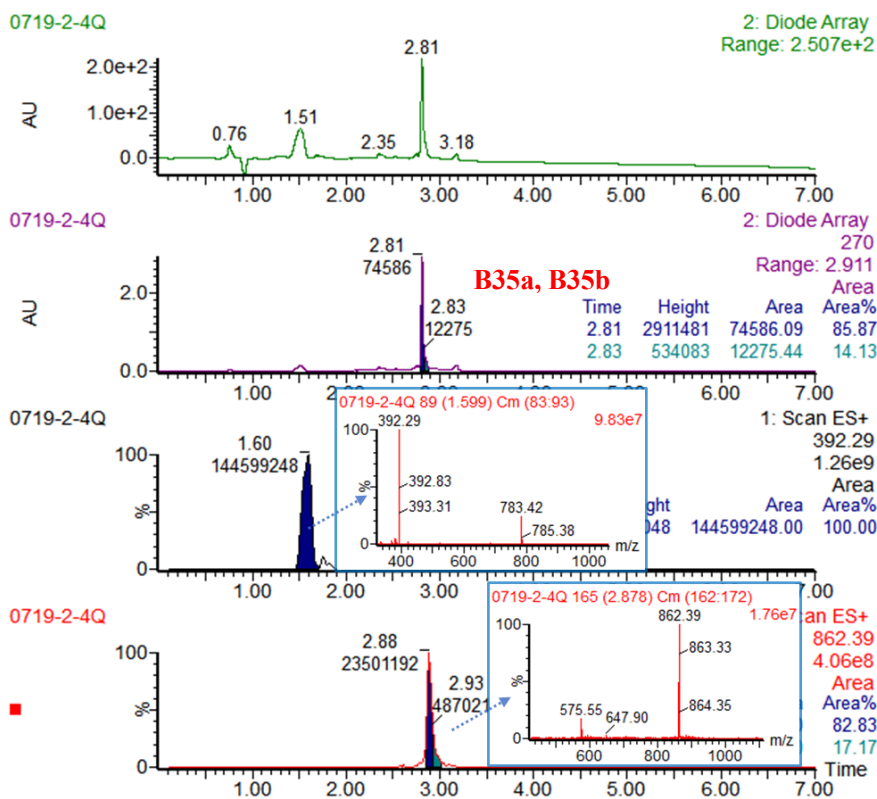

**Fig S186** UPLC-MS chromatogram of reaction mixture including TIC, UV curves (full-wavelength and extracted at 270 nm) and ESI-MS spectrum of **B35a** and **B35b**. Extract mass chromatograms from



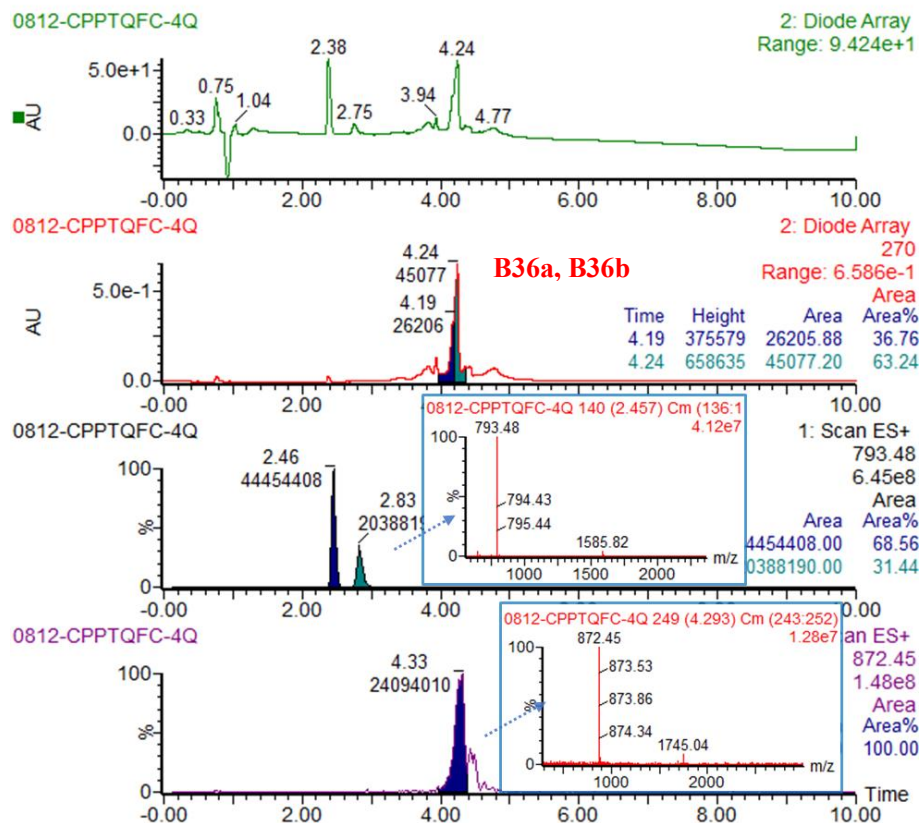

**Fig S188** UPLC-MS chromatogram of reaction mixture including TIC, UV curves (full-wavelength and extracted at 270 nm) and ESI-MS spectrum of **B36a** and **B36b**. Extract mass chromatograms from full scan data. The yield of cyclodimerization products was determined to be 35% using Equation 1.

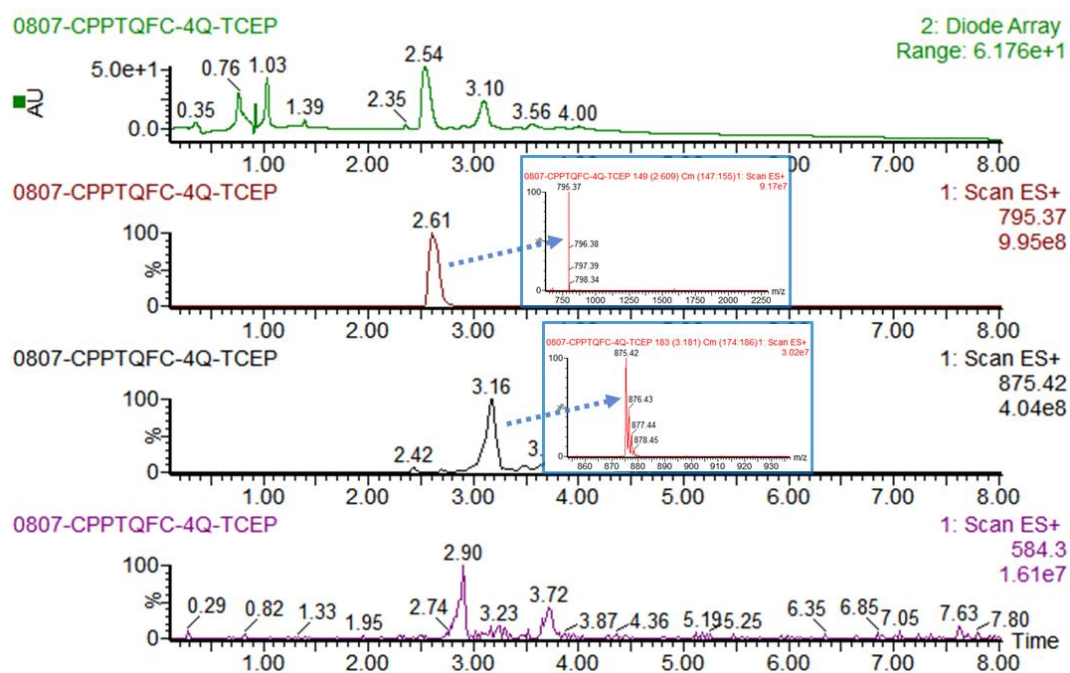

**Fig S189.** UPLC-MS chromatogram of reaction mixture with TCEP including TIC, UV curve (full-wavelength) and ESI-MS spectrum. Extract mass chromatograms from full scan data.

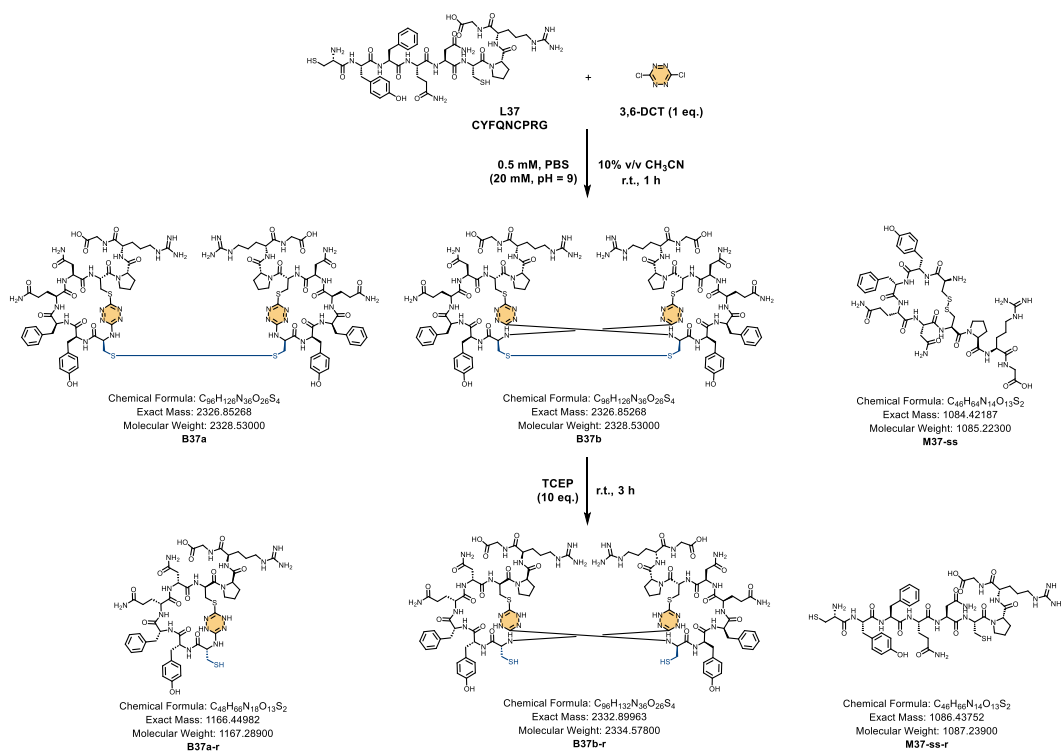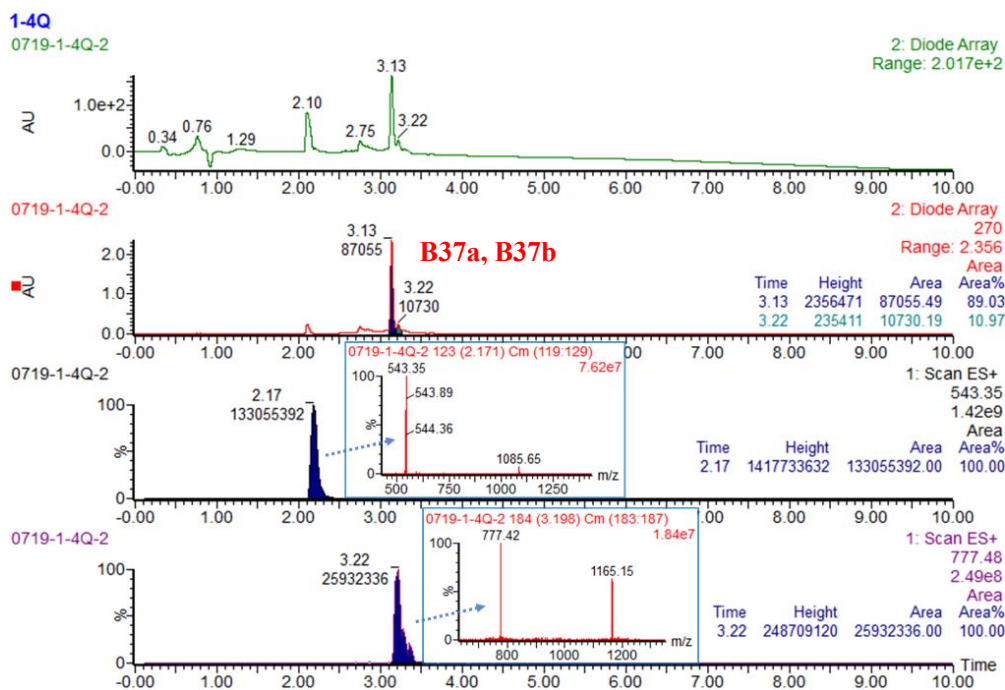

**Fig S190** UPLC-MS chromatogram of reaction mixture including TIC, UV curves (full-wavelength and extracted at 270 nm) and ESI-MS spectrum of **B37a** and **B37b**. Extract mass chromatograms from full scan data. The yield of cyclodimerization products was determined to be 49% using Equation 1.



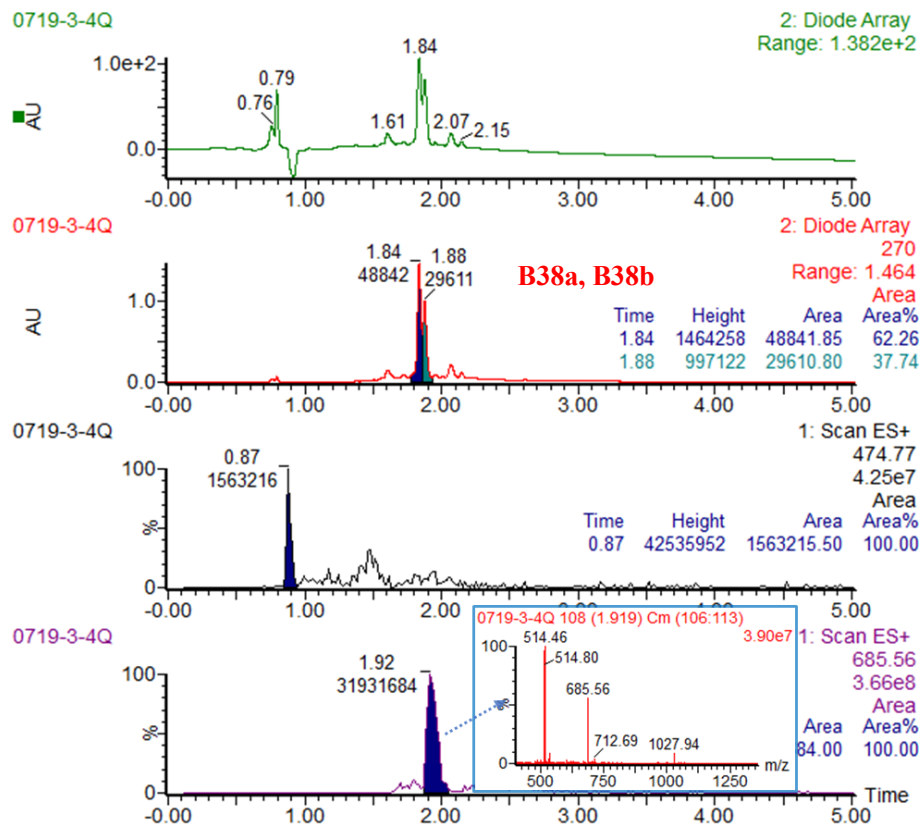

**Fig S192.** UPLC-MS chromatogram of reaction mixture including TIC, UV curves (full-wavelength and extracted at 270 nm) and ESI-MS spectrum of **B38a** and **B38b**. Extract mass chromatograms from full scan data. The yield of cyclodimerization products was determined to be 39% using Equation 1.

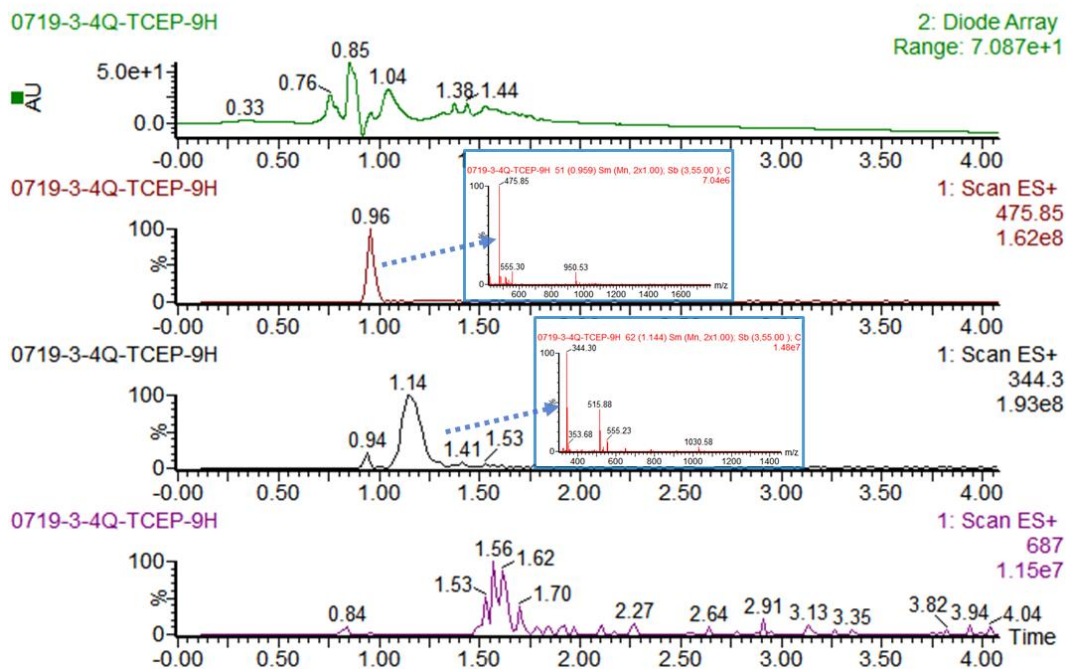

**Fig S193.** UPLC-MS chromatogram of reaction mixture with TCEP including TIC, UV curve (full-wavelength) and ESI-MS spectrum. Extract mass chromatograms from full scan data.

## Control experiments with L44:

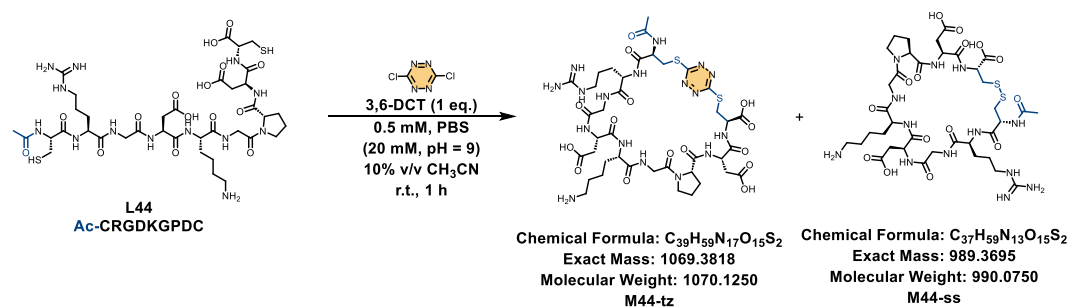

The dried peptide **L44** (1.0 equiv.) was dissolved in appropriate amount of PBS (20 mM, pH = 9.0) to reach a concentration of 0.56 mM. To this solution, 3,6-DCT (1.0 equiv.) dissolved in acetonitrile (1/9 of the volume of buffer) was added. The final concentrations in the reaction were 0.5 mM peptide, 0.5 mM 3,6-DCT and 10% acetonitrile, followed by thorough mixing. The reaction mixture was shaken at 25 °C and 800 rpm for 1 h on a thermostatic shaker.

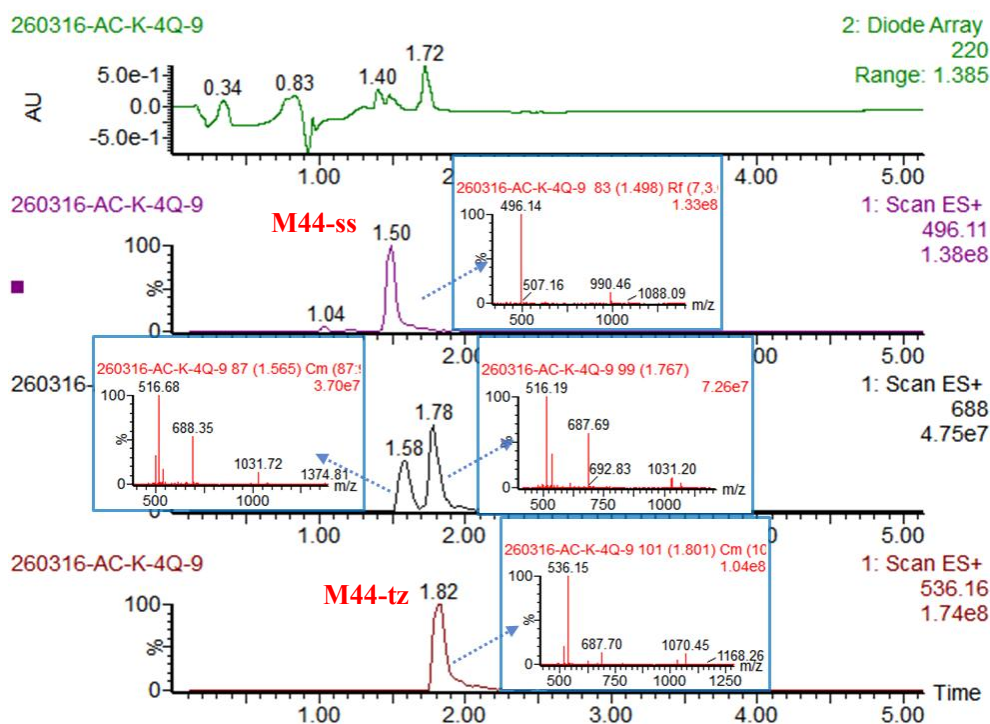

**Fig S194.** UPLC-MS chromatogram of **L44** and 3,6-DCT reaction mixture including TIC, UV curve (extracted at 220 nm) and ESI-MS spectrum. Extract mass chromatograms from full scan data.

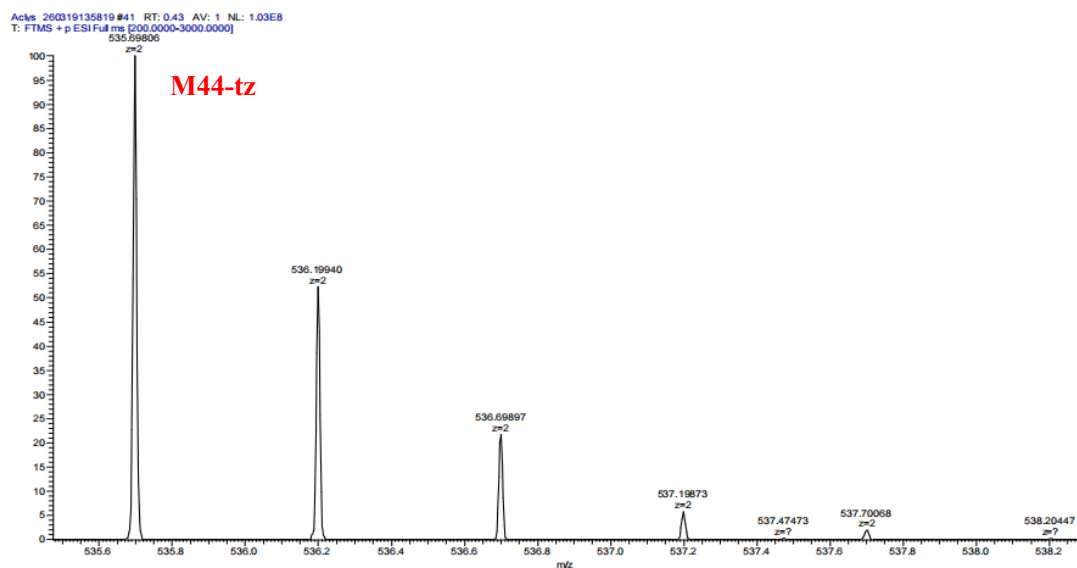

**Fig S195.** Q-TOF-HRMS spectrum of **M44-tz**. HRMS (ES<sup>+</sup>) m/z: [M+2H]<sup>2+</sup> calcd for C<sub>39</sub>H<sub>59</sub>N<sub>17</sub>O<sub>15</sub>S<sub>2</sub> 535.69, found 535.70.

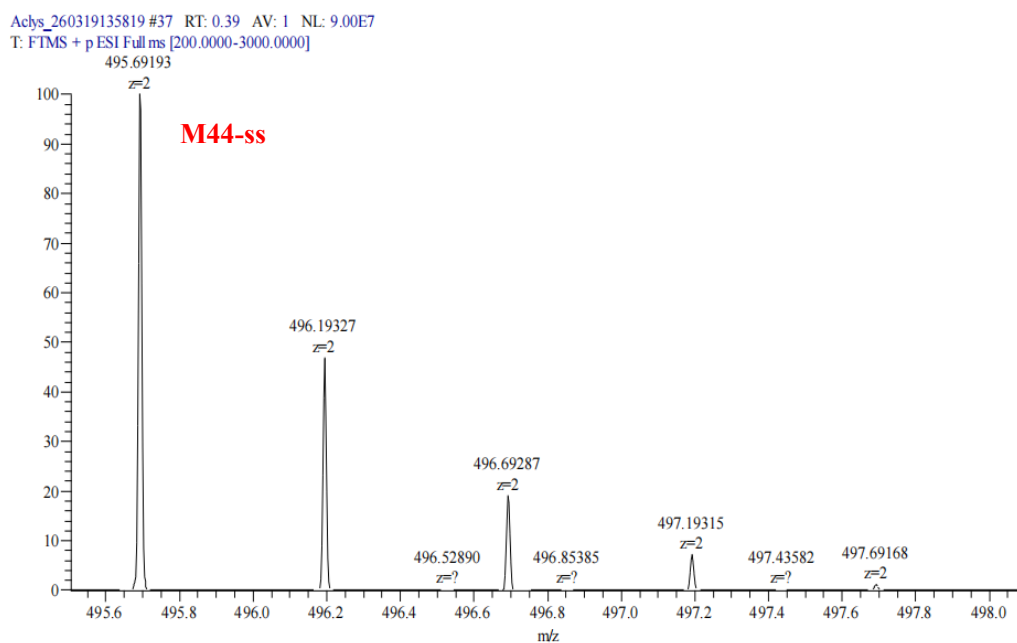

**Fig S196.** Q-TOF-HRMS spectrum of **M44-ss**. HRMS (ES<sup>+</sup>) m/z: [M+2H]<sup>2+</sup> calcd for C<sub>37</sub>H<sub>58</sub>N<sub>13</sub>O<sub>15</sub>S<sub>2</sub> 495.69, found 496.69.

To verify the selectivity of the 3,6-DCT-mediated cyclodimerization reaction, **L38** was selected as a model substrate. The cyclodimerization products **B38a** and **B38b** were isolated and purified by RP-HPLC for subsequent structural characterization by NMR spectroscopy. Meanwhile, the cyclodimerization product was dissolved in PBS buffer (20 mM, pH 7.4), treated with TCEP (10 equiv), and allowed to react at room temperature for 3 h.

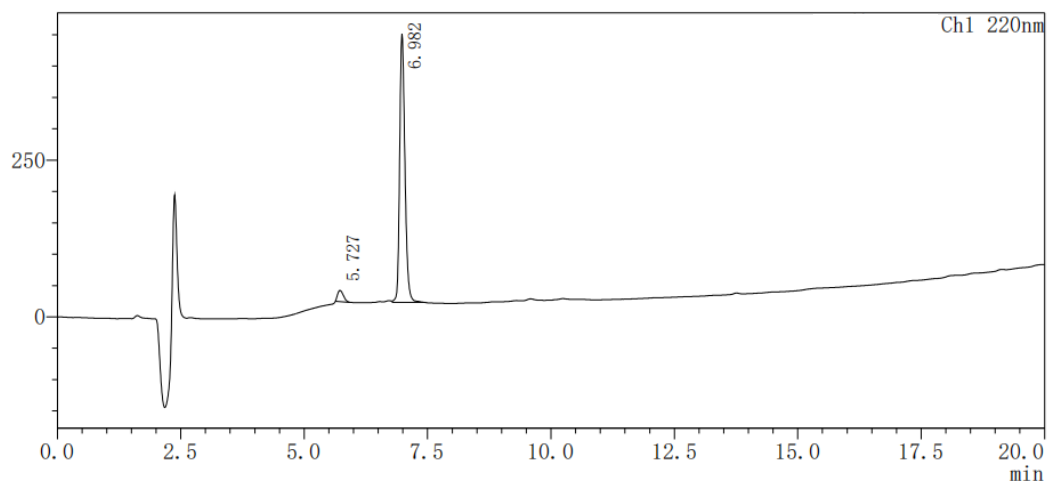

**Fig S197.** HPLC-UV chromatogram at 220 nm of **B38a**. Analytical HPLC using Method F, RT = 6.982 min, the HPLC purity is 96%.

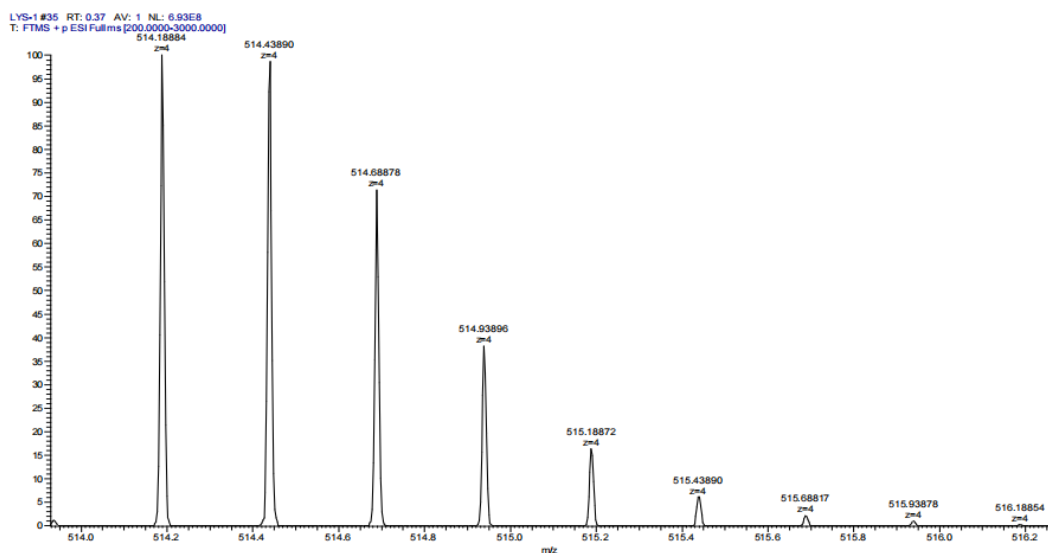

| m/z       | Theo. Mass | Delta (ppm) | RDB equiv. | Composition                                                                     |                      |
|-----------|------------|-------------|------------|---------------------------------------------------------------------------------|----------------------|
| 514.18884 | 514.18898  | -0.27       | 34         | C <sub>74</sub> H <sub>116</sub> O <sub>28</sub> N <sub>34</sub> S <sub>4</sub> | [M+4H] <sup>4+</sup> |

**Fig S198.** Q-TOF-HRMS spectrum of **B38a**. HRMS (ES<sup>+</sup>) m/z: [M+4H]<sup>4+</sup> calcd for C<sub>74</sub>H<sub>112</sub>N<sub>34</sub>O<sub>28</sub>S<sub>4</sub> 514.18, found 514.19.

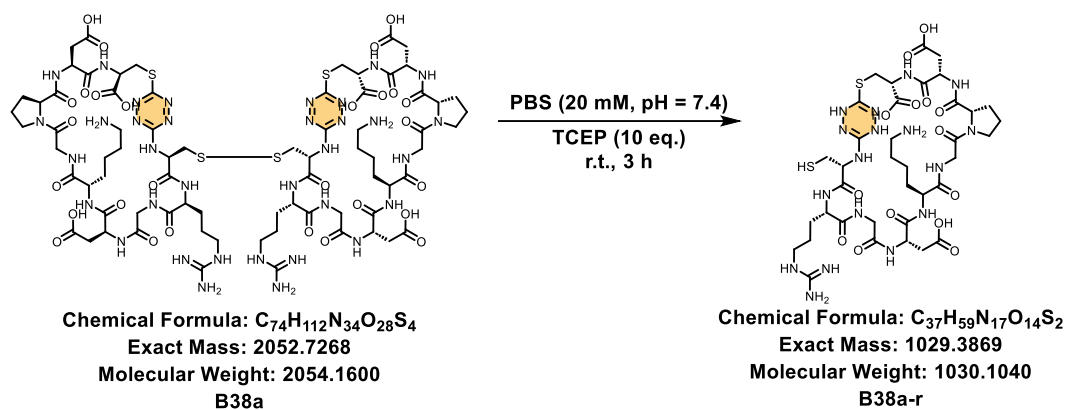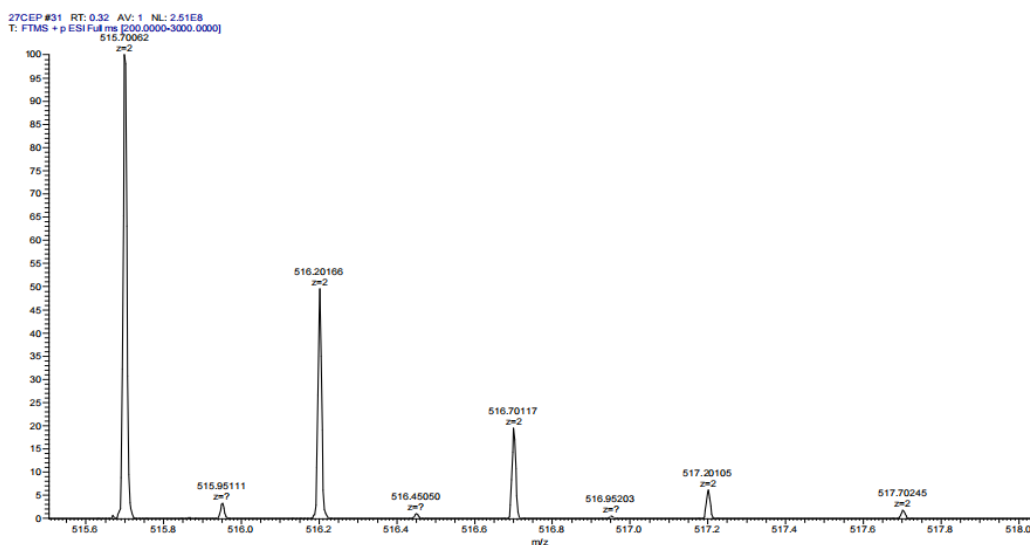

**Fig S199.** Q-TOF-HRMS spectrum of **B38a-r**. HRMS (ES<sup>+</sup>) m/z: [M+4H]<sup>4+</sup> calcd for  $C_{37}H_{59}N_{17}O_{14}S_2$  515.69, found 515.70.

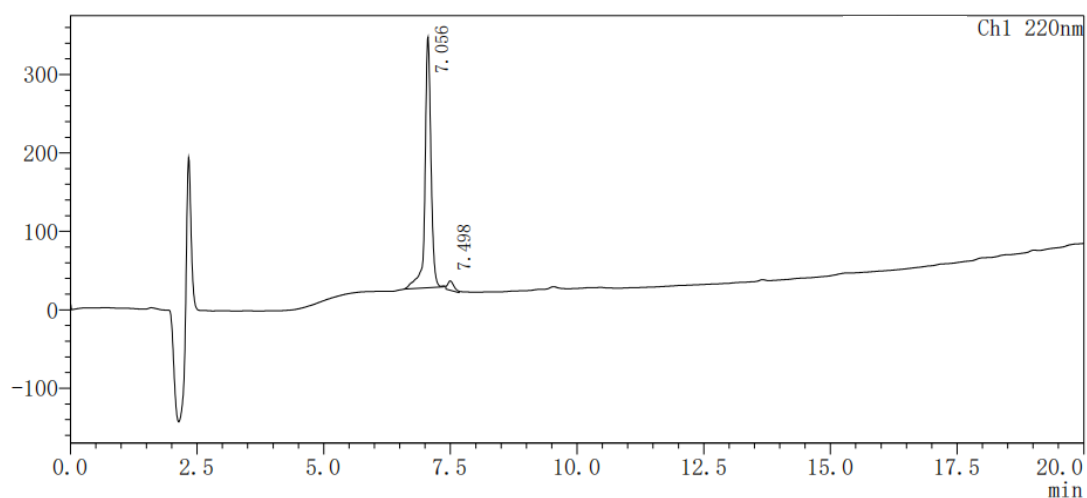

**Fig S200.** HPLC-UV chromatogram at 220 nm of **B38b**. Analytical HPLC using Method F, RT =

6.982 min, the HPLC purity is 96%.

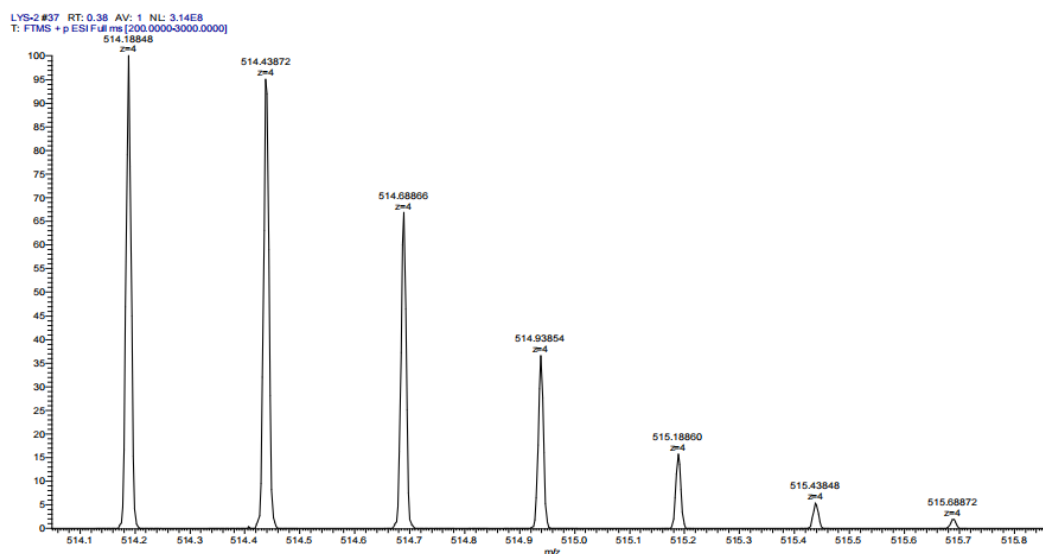

| m/z       | Theo. Mass | Delta (ppm) | RDB equiv. | Composition         |                      |
|-----------|------------|-------------|------------|---------------------|----------------------|
| 514.18848 | 514.18898  | -0.97       | 34         | C74 H116 O28 N34 S4 | [M+4H] <sup>4+</sup> |

**Fig S201.** Q-TOF-HRMS spectrum of **B38b**. HRMS (ES<sup>+</sup>) m/z: [M+4H]<sup>4+</sup> calcd for C<sub>74</sub>H<sub>112</sub>N<sub>34</sub>O<sub>28</sub>S<sub>4</sub> 514.18, found 514.19.

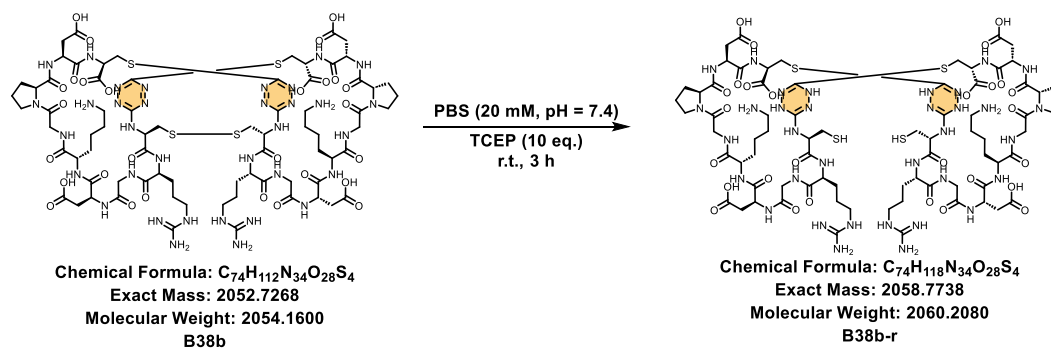

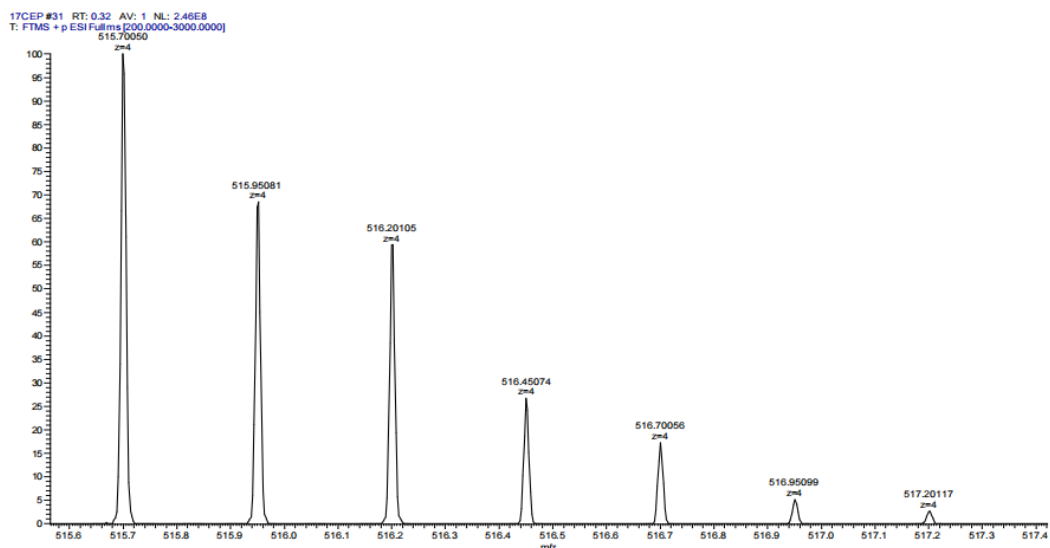

| m/z      | Theo. Mass | Delta (ppm) | RDB equiv. | Composition         |                      |
|----------|------------|-------------|------------|---------------------|----------------------|
| 515.7005 | 515.70072  | -0.42       | 31         | C74 H122 O28 N34 S4 | [M+4H] <sup>4+</sup> |

**Fig S202.** Q-TOF-HRMS spectrum of **B38b-r**. HRMS (ES<sup>+</sup>) m/z: [M+4H]<sup>4+</sup> calcd for C<sub>74</sub>H<sub>118</sub>N<sub>34</sub>O<sub>28</sub>S<sub>4</sub> 515.69, found 515.70.

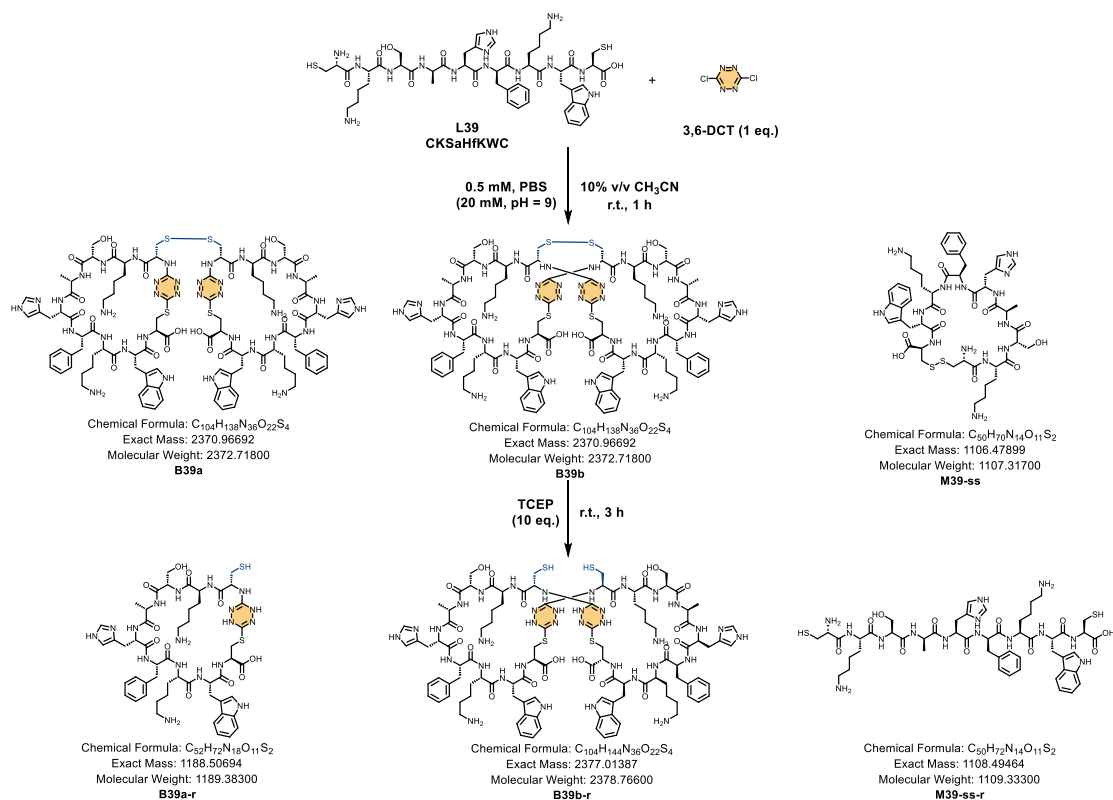

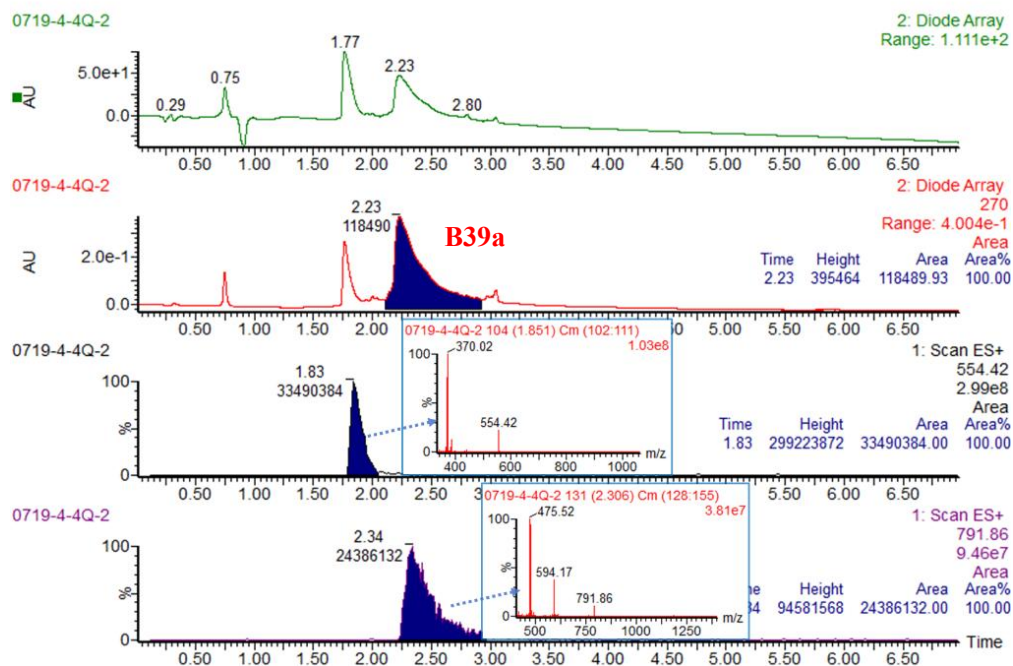

**Fig S203** UPLC-MS chromatogram of reaction mixture including TIC, UV curves (full-wavelength and extracted at 270 nm) and ESI-MS spectrum of **B39a**. Extract mass chromatograms from full scan data. The yield of cyclodimerization products was determined to be 60% using Equation 1.

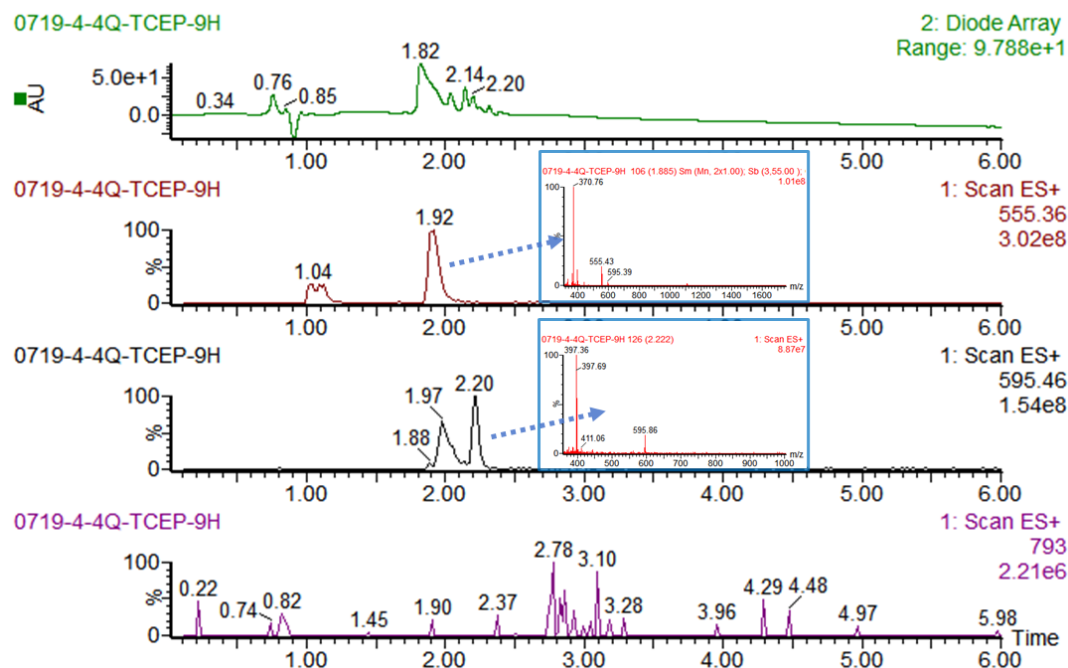

**Fig S204** UPLC-MS chromatogram of reaction mixture with TCEP including TIC, UV curve (full-wavelength) and ESI-MS spectrum. Extract mass chromatograms from full scan data.





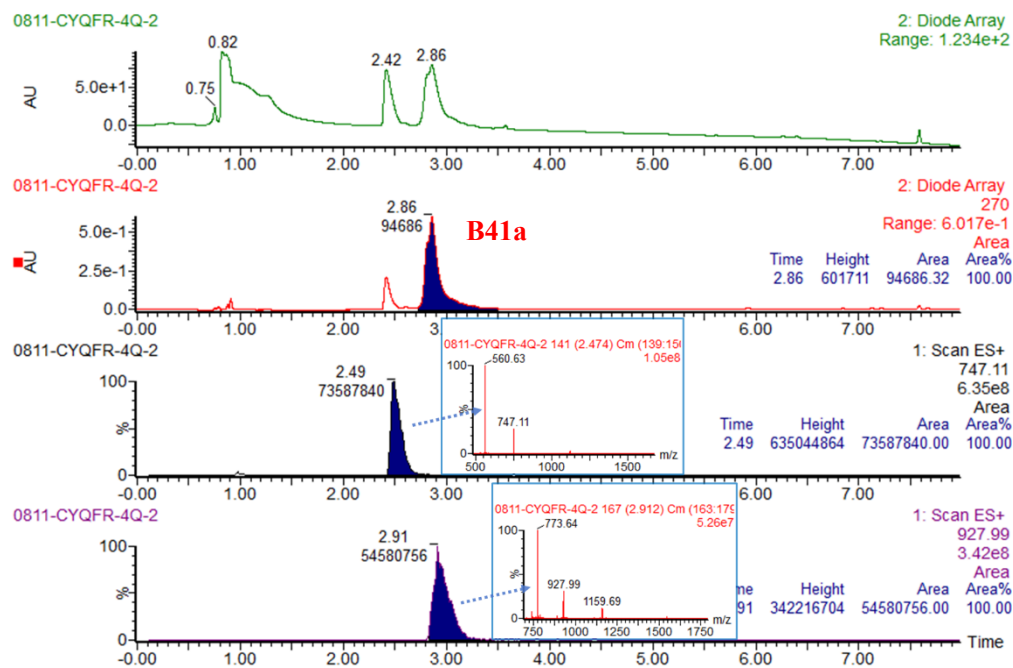

**Fig S207** UPLC-MS chromatogram of reaction mixture including TIC, UV curves (full-wavelength and extracted at 270 nm) and ESI-MS spectrum of **B41a**. Extract mass chromatograms from full scan data. The yield of cyclodimerization products was determined to be 48% using Equation 1.

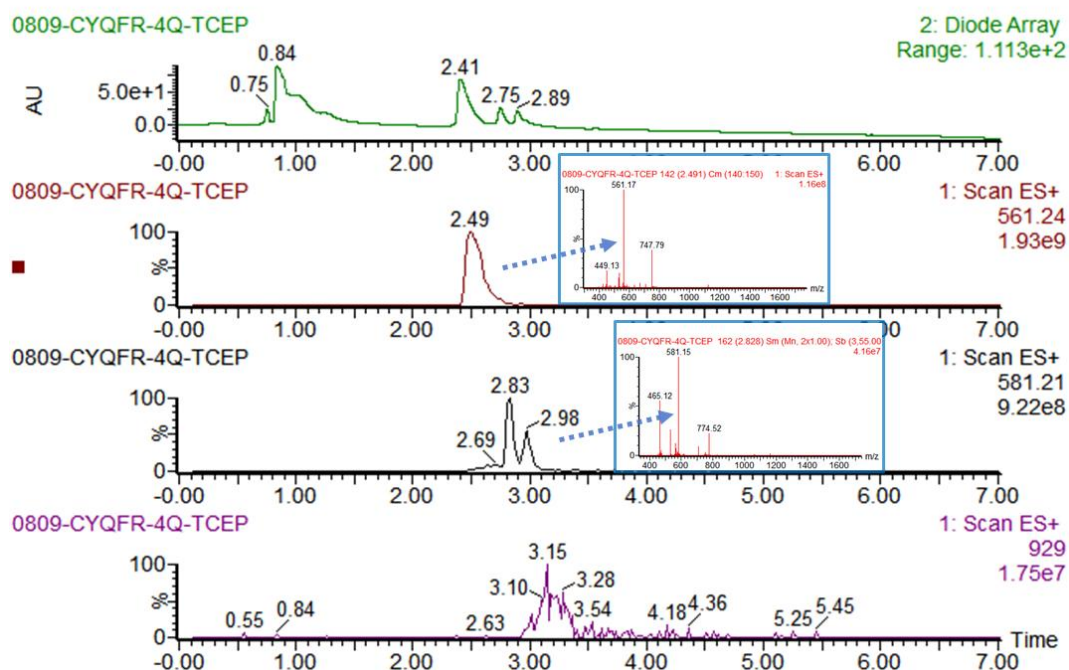

**Fig S208.** UPLC-MS chromatogram of reaction mixture with TCEP including TIC, UV curve (full-wavelength) and ESI-MS spectrum. Extract mass chromatograms from full scan data.

The **B41a** was isolated, purified by RP-HPLC, and lyophilized for subsequent circular dichroism (CD) experiments. In parallel, the cyclic peptide **aMD4** was

synthesized for CD experiments. Meanwhile, **B41a** was then dissolved in PBS buffer (20 mM, pH 7.4), treated with TCEP (10 equiv.), and allowed to react at room temperature for 3 h.

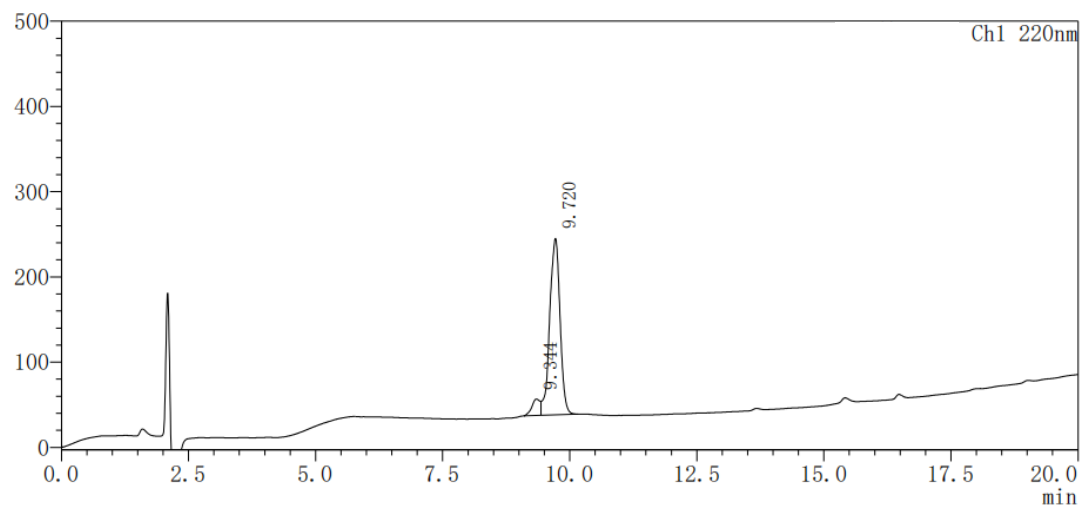

**Fig S209.** HPLC-UV chromatogram at 220 nm of **B41a**. Analytical HPLC using Method F, RT = 9.720 min, the HPLC purity is 93%.

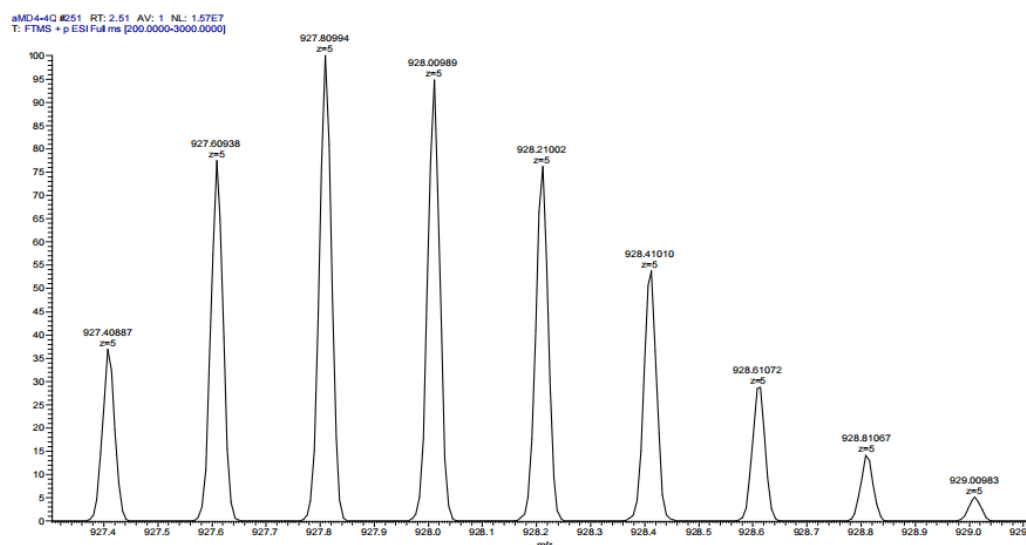

| m/z       | Theo. Mass | Delta (ppm) | RDB equiv. | Composition          |                      |
|-----------|------------|-------------|------------|----------------------|----------------------|
| 927.40887 | 927.40935  | -0.52       | 91.5       | C196 H283 O54 N72 S4 | [M+5H] <sup>5+</sup> |

**Fig S210.** Q-TOF-HRMS spectrum of **B41a**. HRMS (ES<sup>+</sup>) m/z: [M+5H]<sup>5+</sup> calcd for C<sub>196</sub>H<sub>278</sub>N<sub>72</sub>O<sub>54</sub>S<sub>4</sub> 927.40, found 927.41.

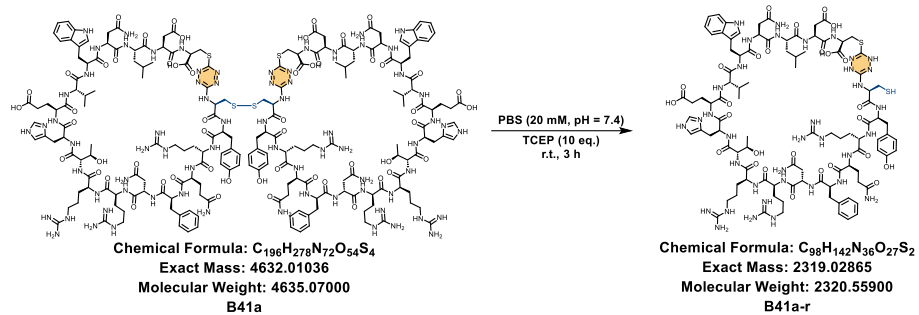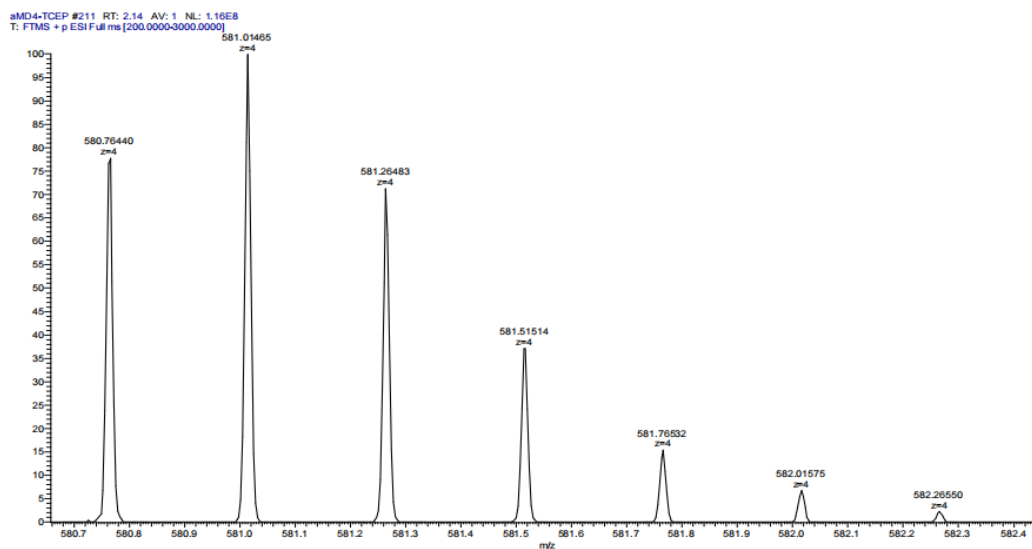

| m/z       | Theo. Mass | Delta (ppm) | RDB equiv. | Composition         |                      |
|-----------|------------|-------------|------------|---------------------|----------------------|
| 580.76440 | 580.76444  | -0.07       | 44         | C98 H146 O27 N36 S2 | [M+4H] <sup>4+</sup> |

**Fig S211.** Q-TOF-HRMS spectrum of **B41a-r**. HRMS (ES<sup>+</sup>) m/z: [M+4H]<sup>4+</sup> calcd for C<sub>98</sub>H<sub>142</sub>N<sub>36</sub>O<sub>27</sub>S<sub>2</sub> 580.76, found 580.76.

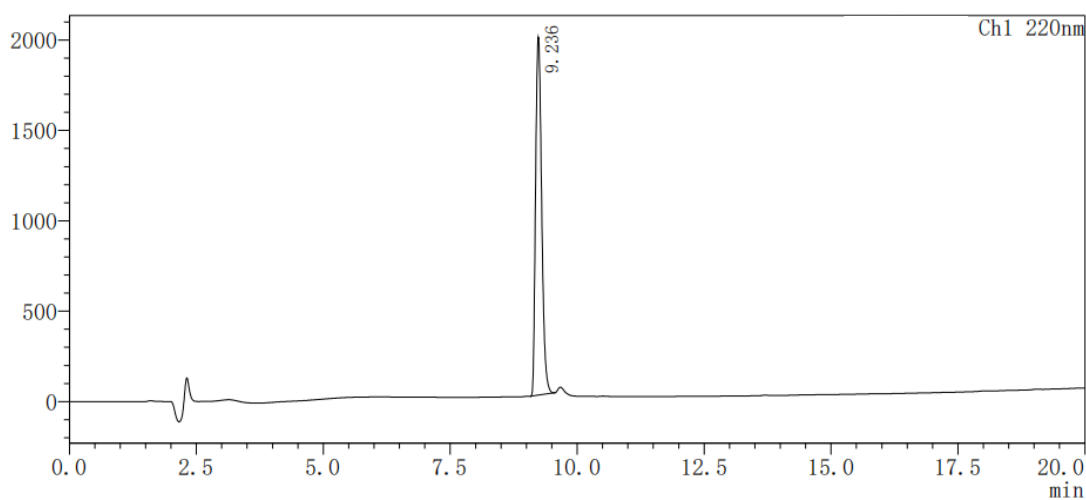

**Fig S212.** HPLC-UV chromatogram at 220 nm of **aMD4**. Analytical HPLC using Method F, RT = 9.236 min, the HPLC purity is 99%.

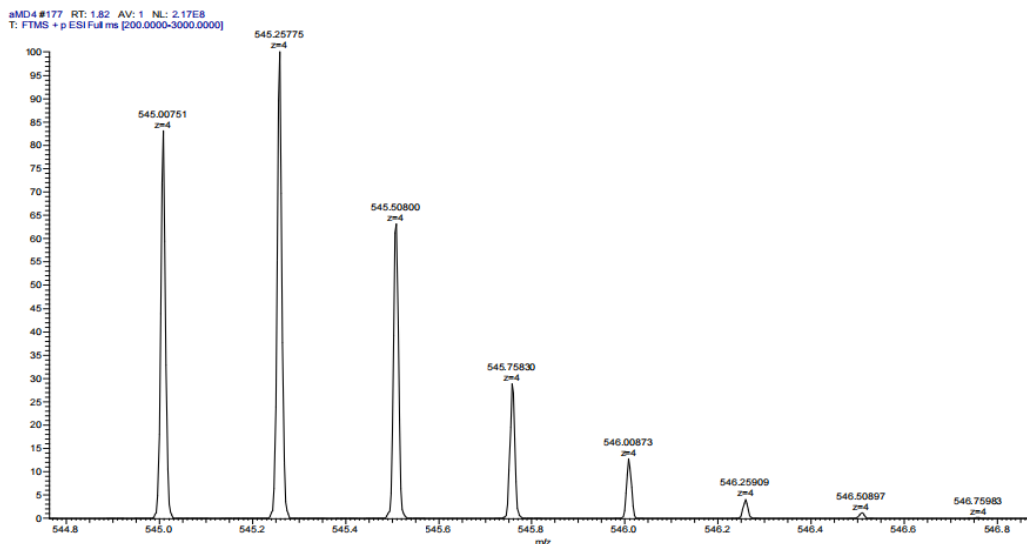

| m/z       | Theo. Mass | Delta (ppm) | RDB equiv. | Composition        |                      |
|-----------|------------|-------------|------------|--------------------|----------------------|
| 545.00751 | 545.0078   | -0.53       | 41         | C95 H141 O27 N31 S | [M+4H] <sup>4+</sup> |

**Fig S213.** Q-TOF-HRMS spectrum of **aMD4**. HRMS (ES<sup>+</sup>) m/z: [M+4H]<sup>4+</sup> calcd for C<sub>95</sub>H<sub>137</sub>N<sub>31</sub>O<sub>27</sub>S<sub>2</sub> 545.01, found 545.01.

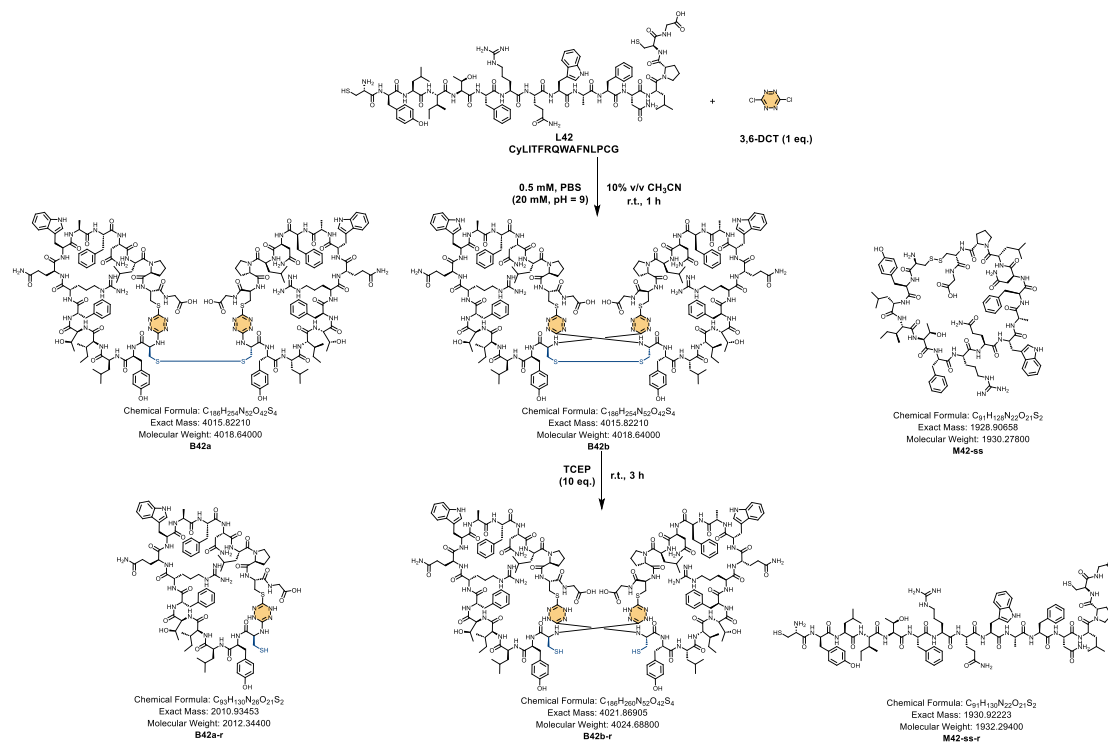

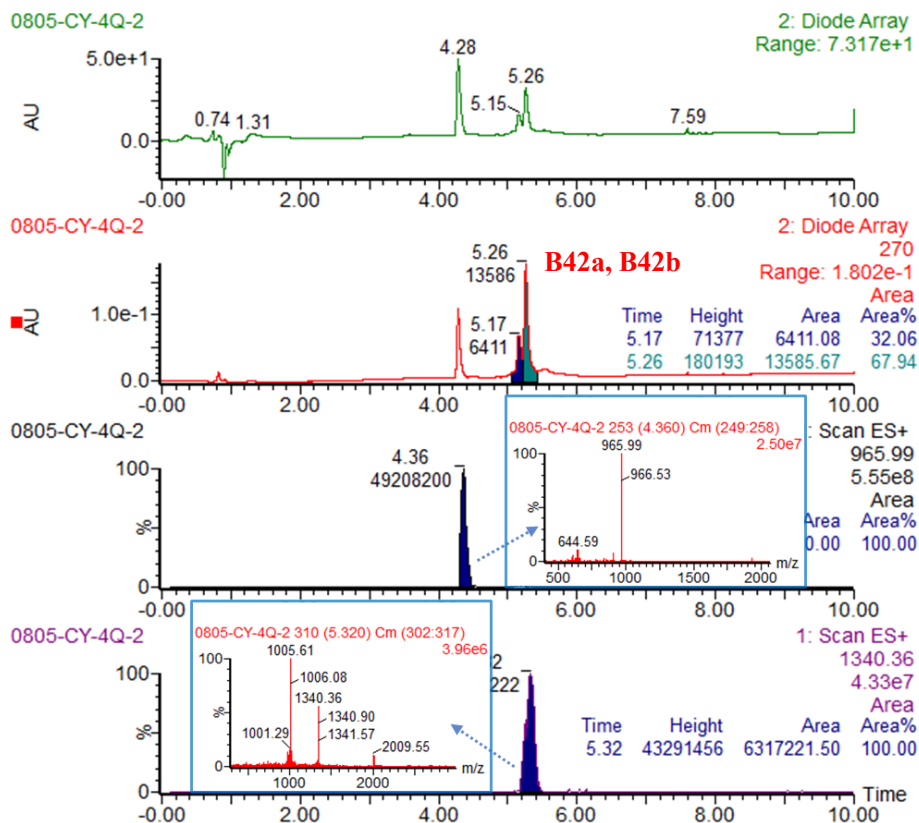

**Fig S214** UPLC-MS chromatogram of reaction mixture including TIC, UV curves (full-wavelength and extracted at 270 nm) and ESI-MS spectrum of **B42a** and **B42b**. Extract mass chromatograms from full scan data. The yield of cyclodimerization products was determined to be 31% using Equation 1.

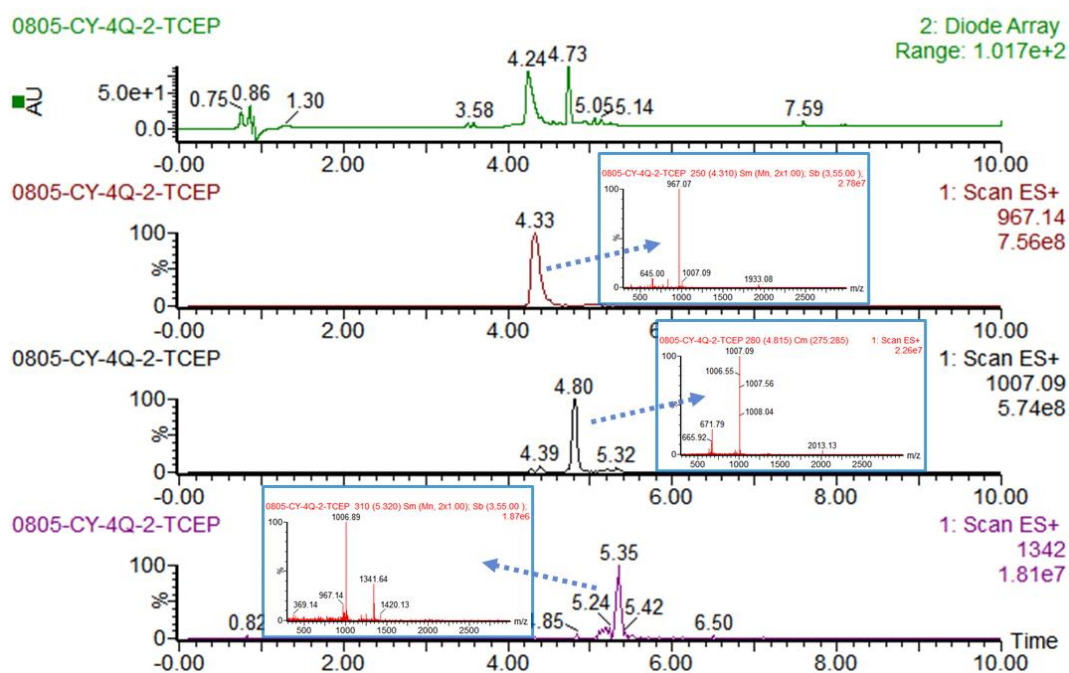

**Fig S215.** UPLC-MS chromatogram of reaction mixture with TCEP including TIC, UV curve (full-wavelength) and ESI-MS spectrum. Extract mass chromatograms from full scan data.

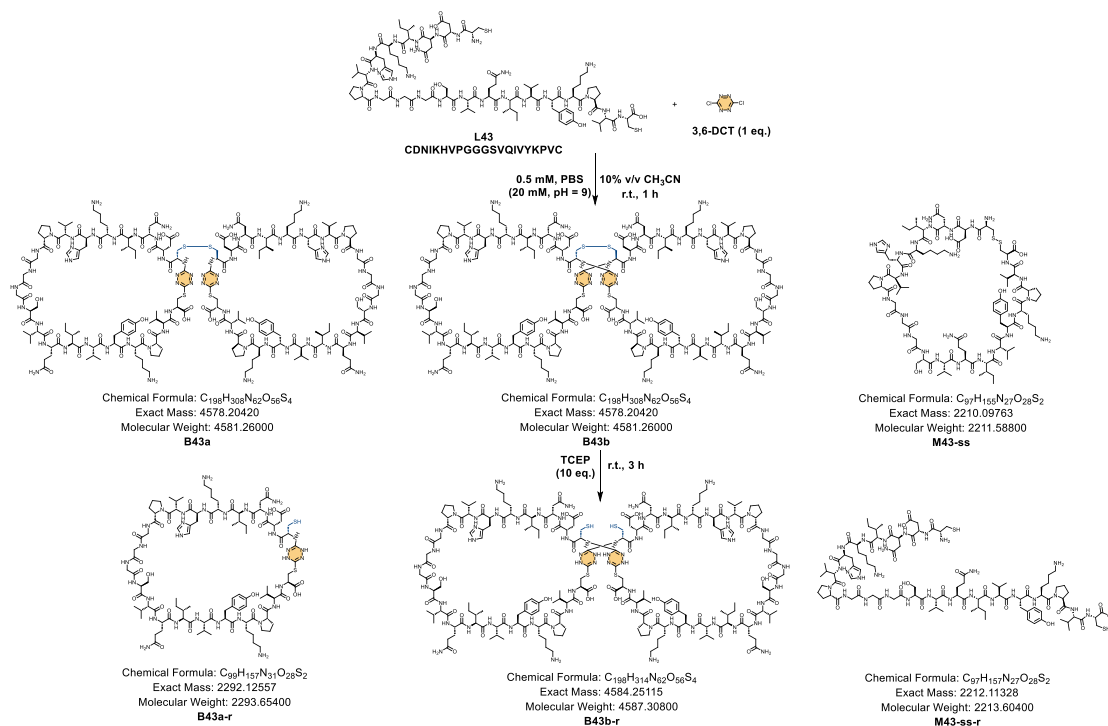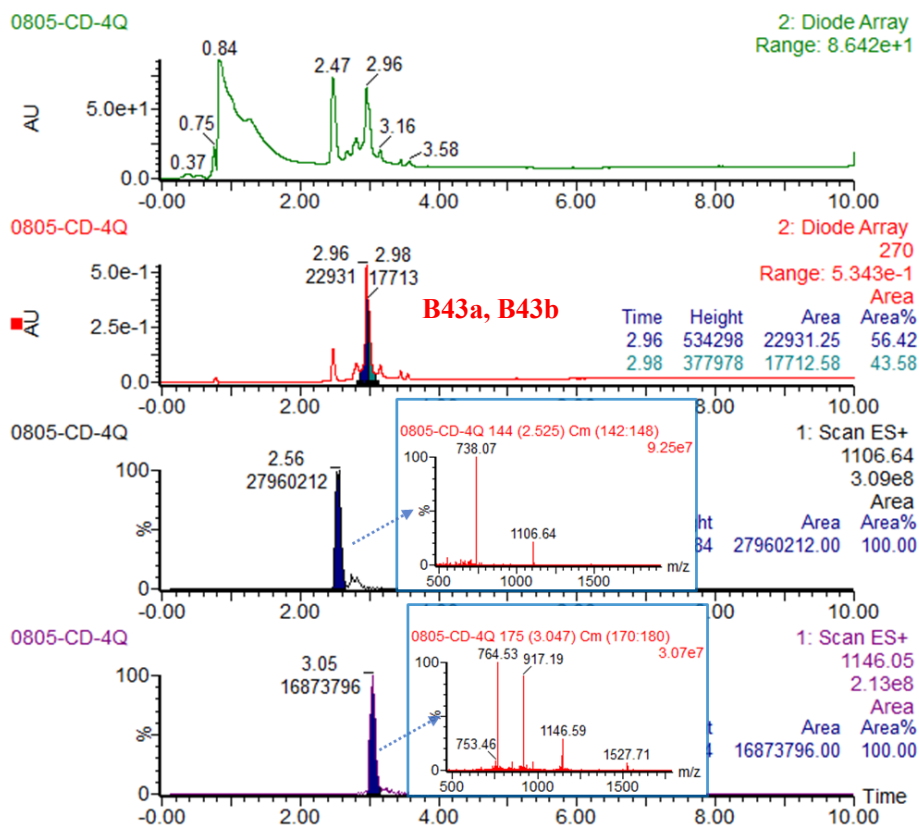

**Fig S216** UPLC-MS chromatogram of reaction mixture including TIC, UV curves (full-wavelength

and extracted at 270 nm) and ESI-MS spectrum of **B43a** and **B43b**. Extract mass chromatograms from full scan data. The yield of cyclodimerization products was determined to be 37% using Equation 1.

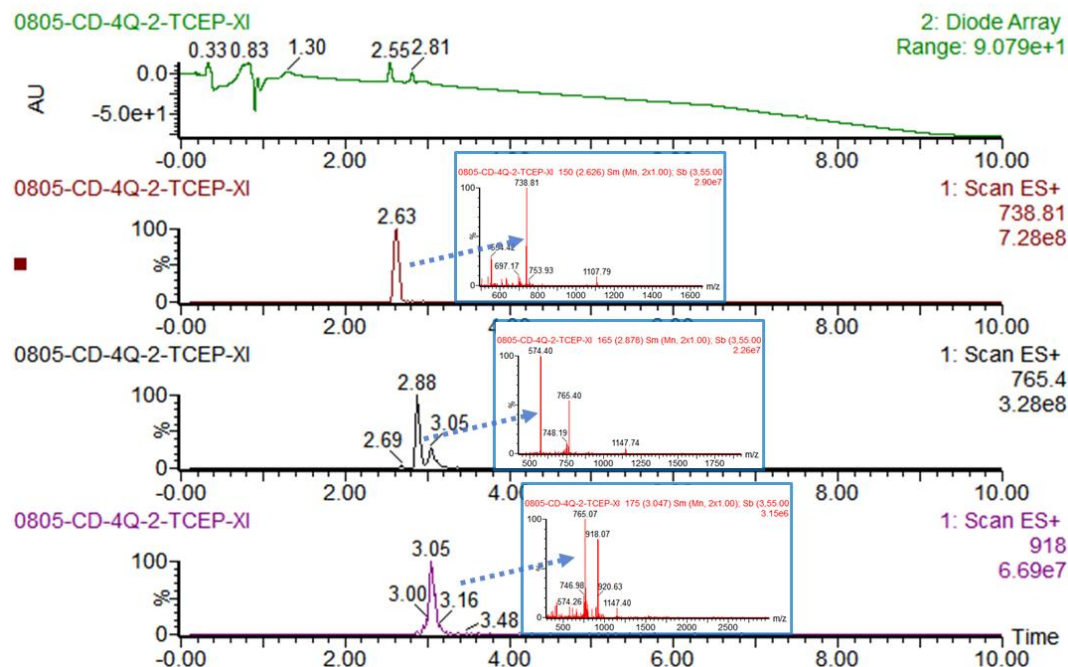

**Fig S217.** UPLC-MS chromatogram of reaction mixture with TCEP including TIC, UV curve (full-wavelength) and ESI-MS spectrum. Extract mass chromatograms from full scan data.

## 7.2 Circular dichroism assay

Before sample measurement, **L41**, **B41a**, and **aMD4** was diluted to a final concentration of 10  $\mu\text{M}$  in ultrapure water. Subsequently, spectral data were recorded using a Jasco J-815 CD spectrometer, with the wavelength range set from 260 to 190 nanometers at a precision of 0.1 nanometer intervals. The scan speed was set at 50 nanometers per minute, with a data integration time of 4 seconds, a bandwidth of 1 nanometer, and an optical path length of 1 millimeter. Measurements were repeated three times to enhance data reliability. The entire measurement process was conducted under a constant temperature of 25°C. Finally, all recorded spectral data required subtraction of the background signal containing only the ultrapure water.

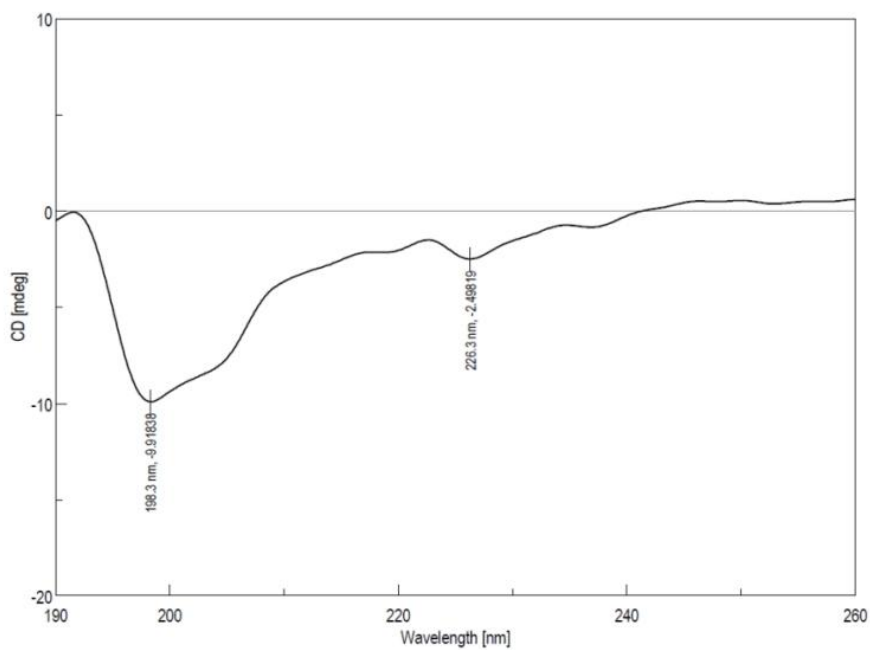

— L41.jws

[Measurement Information]  
 Instrument name IMMCD  
 Model name J-815  
 Serial No. A024461168

Accessory Standard  
 Accessory S/N A005461185  
 Cell length 1 mm

Measurement date 2026/3/27 16:29

Photometric mode CD, HT, Abs  
 Measure range 260 - 190 nm  
 Data pitch 0.1 nm  
 Sensitivity Standard  
 D.I.T. 4 sec  
 Bandwidth 1.00 nm  
 Start mode Immediately  
 Scanning speed 50 nm/min  
 Baseline correction Baseline  
 Shutter control Auto  
 CD detector PMT  
 PMT voltage Auto  
 Accumulations 2

Concentration 0.1 mmol/L  
 Solvent H2O

[Detailed Information]  
 Creation date 2026/3/30 16:32  
 Data array type Linear data array \* 3  
 Horizontal axis Wavelength [nm]  
 Vertical axis(1) CD [mdeg]  
 Vertical axis(2) HT [V]  
 Vertical axis(3) Abs  
 Start 260 nm  
 End 190 nm  
 Data interval 0.1 nm  
 Data points 701

**Fig S218.** Circular dichroism spectrum of **L41**.

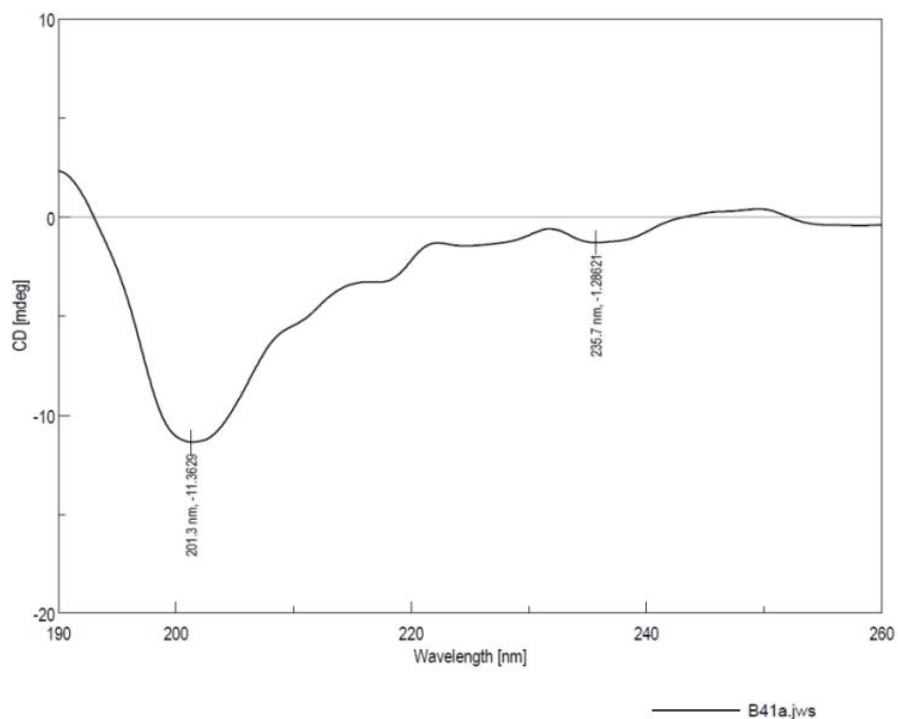

|                                  |                 |                               |                       |
|----------------------------------|-----------------|-------------------------------|-----------------------|
| <b>[Measurement Information]</b> |                 | <b>[Detailed Information]</b> |                       |
| Instrument name                  | IMMCD           | Creation date                 | 2026/3/30 16:31       |
| Model name                       | J-815           | Data array type               | Linear data array * 3 |
| Serial No.                       | A024461168      | Horizontal axis               | Wavelength [nm]       |
| Accessory                        | Standard        | Vertical axis(1)              | CD [mdeg]             |
| Accessory S/N                    | A005461185      | Vertical axis(2)              | HT [V]                |
| Cell length                      | 1 mm            | Vertical axis(3)              | Abs                   |
| Measurement date                 | 2026/3/27 16:39 | Start                         | 260 nm                |
| Photometric mode                 | CD, HT, Abs     | End                           | 190 nm                |
| Measure range                    | 260 - 190 nm    | Data interval                 | 0.1 nm                |
| Data pitch                       | 0.1 nm          | Data points                   | 701                   |
| Sensitivity                      | Standard        |                               |                       |
| D.I.T.                           | 4 sec           |                               |                       |
| Bandwidth                        | 1.00 nm         |                               |                       |
| Start mode                       | Immediately     |                               |                       |
| Scanning speed                   | 50 nm/min       |                               |                       |
| Baseline correction              | Baseline        |                               |                       |
| Shutter control                  | Auto            |                               |                       |
| CD detector                      | PMT             |                               |                       |
| PMT voltage                      | Auto            |                               |                       |
| Accumulations                    | 2               |                               |                       |
| Concentration                    | 0.1 mmol/L      |                               |                       |
| Solvent                          | H2O             |                               |                       |

**Fig S219.** Circular dichroism spectrum of **B41a**.

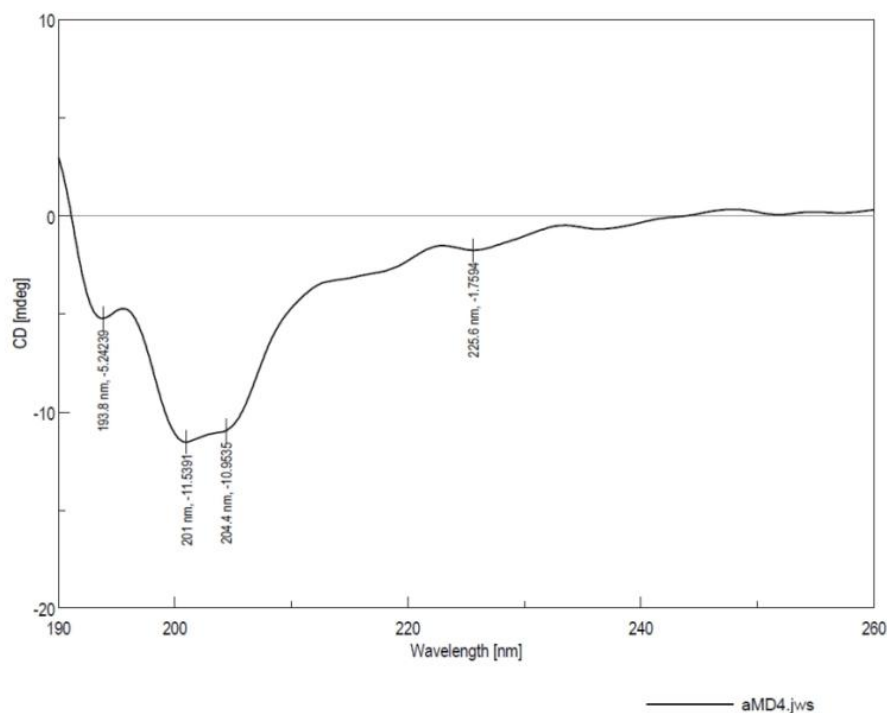

|                           |                 |                        |                       |
|---------------------------|-----------------|------------------------|-----------------------|
| [Measurement Information] |                 | [Detailed Information] |                       |
| Instrument name           | IMMCD           | Creation date          | 2026/3/30 16:33       |
| Model name                | J-815           | Data array type        | Linear data array * 3 |
| Serial No.                | A024461168      | Horizontal axis        | Wavelength [nm]       |
| Accessory                 | Standard        | Vertical axis(1)       | CD [mdeg]             |
| Accessory S/N             | A005461185      | Vertical axis(2)       | HT [V]                |
| Cell length               | 1 mm            | Vertical axis(3)       | Abs                   |
| Measurement date          | 2026/3/27 16:48 | Start                  | 260 nm                |
| Photometric mode          | CD, HT, Abs     | End                    | 190 nm                |
| Measure range             | 260 - 190 nm    | Data interval          | 0.1 nm                |
| Data pitch                | 0.1 nm          | Data points            | 701                   |
| Sensitivity               | Standard        |                        |                       |
| D.I.T.                    | 4 sec           |                        |                       |
| Bandwidth                 | 1.00 nm         |                        |                       |
| Start mode                | Immediately     |                        |                       |
| Scanning speed            | 50 nm/min       |                        |                       |
| Baseline correction       | Baseline        |                        |                       |
| Shutter control           | Auto            |                        |                       |
| CD detector               | PMT             |                        |                       |
| PMT voltage               | Auto            |                        |                       |
| Accumulations             | 2               |                        |                       |
| Concentration             | 0.1 mmol/L      |                        |                       |
| Solvent                   | H2O             |                        |                       |

**Fig S220.** Circular dichroism spectrum of **aMD4**.

### 7.3 Detailed NMR assignment of key residues in **L38**, **B38a**, and **B38b**

The unambiguous determination of the three-dimensional topologies for the bicyclic isomers **B38a** and **B38b**, as well as their linear precursor **L38**, relies heavily on the precise  $^1\text{H}$  and  $^{13}\text{C}$  NMR assignments of three cornerstone residues: the N-terminal Cys1, the C-terminal Cys9, and the internal Lys. The assignment strategy utilized a rigorous combination of 2D TOCSY, COSY, HSQC, and HMBC experiments,

employing a bottom-up spin-system extraction approach to confirm the covalent connectivity and the strict regioselectivity of the dual-cyclization.

### 7.3.1 NMR Assignment of linear peptide L38

The resonance assignment for the linear peptide **L38** served as the conformational baseline. Starting from the distinct H $\alpha$  proton (4.47 ppm), TOCSY and COSY spectra revealed the complete, unconstrained aliphatic spin network of the Lys side chain, terminating at the  $\epsilon$ -CH<sub>2</sub> protons (2.75 ppm). HSQC analysis mapped these  $\epsilon$ -protons to a C $\epsilon$  chemical shift of 38.35 ppm.

### 7.3.2 NMR assignment of B38a

#### Verification of the Unreacted Internal Lysine:

The assignment was anchored by confirming the chemical integrity of the Lys residue. Using the Lys H $\alpha$  (4.21 ppm) as a starting point, the TOCSY sequence extracted an uninterrupted spin system down to the  $\epsilon$ -CH<sub>2</sub> protons at 2.72 ppm. HSQC correlations verified the corresponding carbon shift as C $\epsilon$  (38.40 ppm). Crucially, the  $\epsilon$ -CH<sub>2</sub> and C $\epsilon$  shifts showed virtually no perturbation compared to the linear precursor **L38**. Furthermore, COSY spectra captured a direct correlation between the  $\epsilon$ -CH<sub>2</sub> (2.72 ppm) and a broad signal at 7.73 ppm, typical of a free ammonium ion (-NH<sub>3</sub><sup>+</sup>). This stationary behavior physically proves the Lys side chain remained completely unreacted during the macrocyclization.

#### Assignment of the C-terminal Cys9:

With the Lys orthogonality confirmed, the C-terminal Cys9 spin system was identified. TOCSY and COSY linked its H $\alpha$  (4.51 ppm) to highly diastereotopic H $\beta$  protons (3.43 and 3.86 ppm). HSQC analysis mapped these H $\beta$  protons to a C $\beta$  chemical shift of 30.88 ppm. The C $\beta$  shift at  $\sim$ 30 ppm is an exclusive hallmark of an aromatic thioether, confirming the S-Ar linkage. Most importantly, HMBC cross-peaks from these Cys9 H $\beta$  protons directly to a quaternary carbon at 165.71 ppm (tetrazine core) provided definitive proof of the C-terminal covalent attachment.

#### Assignment of the N-terminal Cys1:

The N-terminal Cys1 experienced significant deshielding. Its secondary amide proton (NH) was located at an unusually downfield position of 8.76 ppm, characteristic of an arylamine (-NH-Ar) proton forced into the deshielding cone of the tetrazine ring. TOCSY cross-peaks linked this NH to its H $\alpha$  at 4.79 ppm and H $\beta$  at 3.14 ppm. HSQC

analysis mapped the Cys1 H $\beta$  to a C $\beta$  shift of 38.40 ppm. This specific downfield carbon shift confirms that the Cys1 thiol is oxidized, participating in the intramolecular disulfide (S-S) bond. The final structural loop—the N-Ar covalent linkage—was verified by a clear  $^3\text{JCH}$  HMBC cross-peak extending from the Cys1 H $\alpha$  (4.79 ppm) across the secondary amine nitrogen to the tetrazine quaternary carbon (169.66 ppm).

### 7.3.3 NMR assignment of B38b

The resonance assignment for the second topological isomer, **B38b**, followed the identical logical pathway, revealing highly conserved chemical environments for the local covalent nodes, representing a distinct architectural folding of the bicyclic framework.

#### Lys and Cys Residues in B38b:

The Lys residue in **B38b** was extracted via its H $\alpha$  at 4.33 ppm. The sequential TOCSY walk identified the  $\epsilon$ -CH $_2$  protons at 2.75 ppm, mapped via HSQC to a C $\epsilon$  of 38.36 ppm. The absolute stability of these Lys chemical shifts across both isomers reinforces that the side chain acts strictly as a structural bystander. The Cys1 and Cys9 residues exhibited variations in their H $\alpha$  shifts reflecting the new topological expansion, but the core connectivity nodes (S-Ar, S-S, N-Ar) remained functionally intact, confirming **B38a** and **B38b** as true topological isomers.

Tab S14. Detailed  $^1\text{H}$  and  $^{13}\text{C}$  NMR Chemical Shifts (ppm) of key residues in L38, B38a, and

| B38b   |         |      |                   |                         |                         |                   |                     |         |                                                               |    |
|--------|---------|------|-------------------|-------------------------|-------------------------|-------------------|---------------------|---------|---------------------------------------------------------------|----|
| Isomer | Residue | CONH | $\alpha$<br>(H/C) | $\beta$<br>(H/C)        | $\gamma$<br>(H/C)       | $\delta$<br>(H/C) | $\epsilon$<br>(H/C) | NH $_2$ | Key<br>Correlations                                           | 2D |
| L38    | Lys     | 8.39 | 4.47 /<br>49.61   | 1.69,<br>1.63/<br>31.05 | 1.27,<br>1.34/<br>21.77 | 1.52/<br>26.19    | 2.75/<br>38.35      | 7.86    |                                                               |    |
| B38a   | Lys     | 7.67 | 4.21 /<br>52.09   | 1.75 /<br>30.44         | 1.22 /<br>21.83         | 1.47 /<br>26.17   | 2.72 /<br>38.40     | 7.73    | COSY: $\epsilon$ -H<br>(2.72) $\rightarrow$ NH $_2$<br>(7.73) |    |
|        | Cys1    | 8.76 | 4.78 /<br>54.08   | 3.14 /<br>38.40         | —                       | —                 | —                   | —       | HMBC: H $\alpha$ $\rightarrow$<br>Tz C (169.66);<br>N-Ar bond |    |
|        | Cys9    | 8.24 | 4.51 /<br>51.65   | 3.42,<br>3.86/<br>30.88 | —                       | —                 | —                   | —       | HMBC: H $\beta$ $\rightarrow$<br>Tz C (165.71);<br>S-Ar bond  |    |

|             |      |      |              |                    |                    |              |              |      |                                                                 |
|-------------|------|------|--------------|--------------------|--------------------|--------------|--------------|------|-----------------------------------------------------------------|
| <b>B38b</b> | Lys  | —    | 4.33 / 51.84 | 1.74 / 30.63       | 1.33, 1.24 / 21.79 | 1.51 / 26.21 | 2.75 / 38.36 | 7.75 | COSY: $\epsilon$ -H (2.75) $\rightarrow$ NH <sub>2</sub> (7.75) |
|             | Cys1 | 8.79 | 4.85 / 53.61 | 3.22 / 40.13       | —                  | —            | —            | —    | N-Ar NH at 8.79; C $\beta$ (40.13) indicates S-S                |
|             | Cys9 | 8.23 | 4.51 / 49.63 | 3.42, 3.84 / 30.85 | —                  | —            | —            | —    | HMBC: H $\beta$ $\rightarrow$ Tz C (167.13); S-Ar bond          |

## 8. Functionalization of tetrazine-containing cyclodimerization products and construction of three FAP-targeted radiotracers

### 8.1 Construction of three FAP-targeted radiotracers

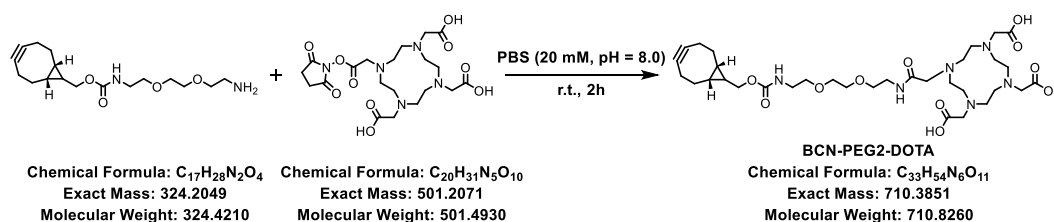

Equimolar amounts of rel-((1R,8S,9s)-bicyclo[6.1.0]non-4-yn-9-yl)methyl (2-(2-(2-aminoethoxy)ethoxy)ethyl)carbamate and NHS-DOTA were dissolved in PBS (20 mM, pH = 8.0) and allowed to react at room temperature for 2 h. The reaction mixture was purified by HPLC to afford **BCN-PEG2-DOTA**.

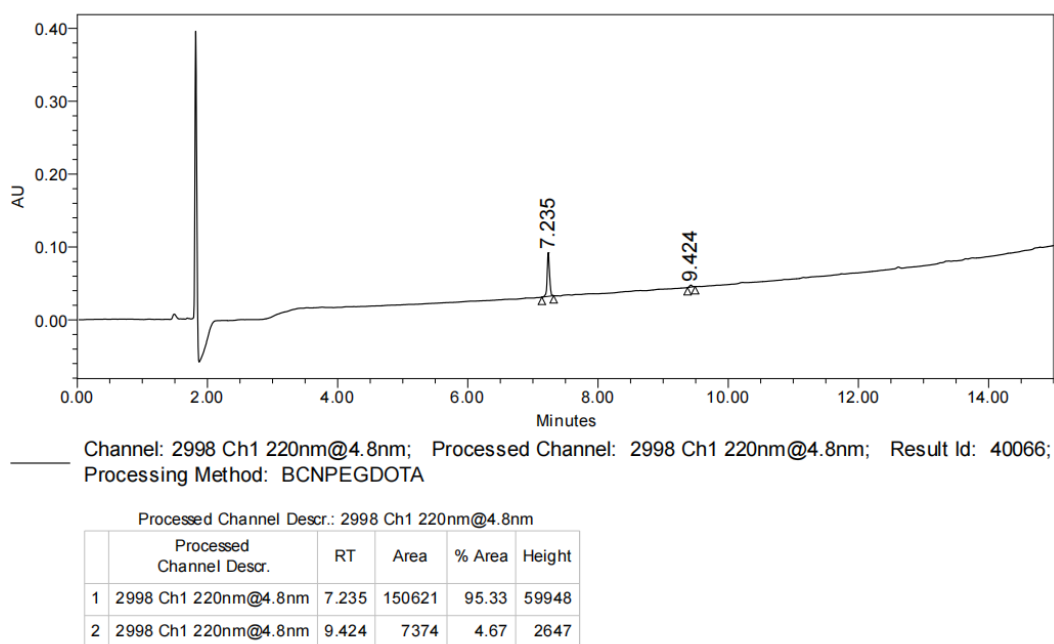

**Fig S221.** HPLC-UV chromatogram at 220 nm of **BCN-PEG2-DOTA**. Analytical HPLC using Method B, RT = 7.235 min, the HPLC purity is 95%.

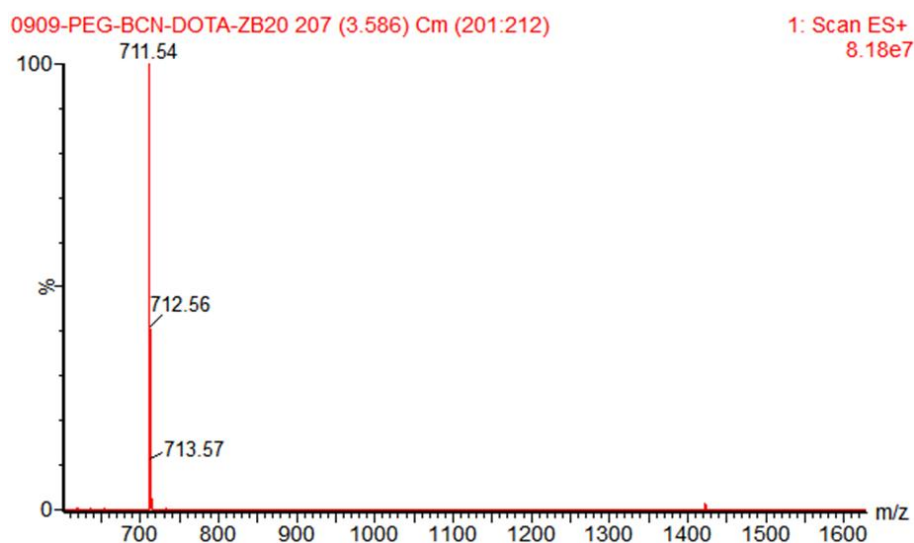

**Fig S222.** LRMS spectrum of **BCN-PEG2-DOTA**. LRMS (ESI+) m/z: 711.54 [M + H]<sup>+</sup>.

Under the standard reaction conditions, the cyclodimerization product **B36a** was re-synthesized and purified in sufficient quantity via the 3,6-DCT-mediated cyclodimerization reaction, one of the isomeric products was isolated and purified for further experiments. The purified **B36a** was dissolved in PBS (20 mM, pH = 7.4), followed by the addition of BCN-PEG2-DOTA conjugate (2.5 equiv.). The mixture was shaken at room temperature and 800 rpm for 48 h on a thermostatic shaker, and the product **FAP-B36** was obtained after purification by HPLC.

Similarly, the lyophilized product **FAP-B36** was dissolved in PBS (20 mM, pH = 7.4), treated with TCEP (10 equiv.), and reacted at room temperature for 30 min to cleave the disulfide bond. The reaction mixture was purified by HPLC to afford **FAP-B36-r**.

The lyophilized product **FAP-B36-r** was dissolved in PBS (20 mM, pH = 7.4) and reacted with N-butyl-2-chloroacetamide (10 equiv.) at room temperature for 2 h. After purification by HPLC, the desired product **FAP-B36-m** was obtained. All compounds **FAP-B36**, **FAP-B36-r**, and **FAP-B36-m** exhibited isomeric species, attributed to the presence of the BCN functionality. And their radiolabeled analogs also displayed isomeric species.

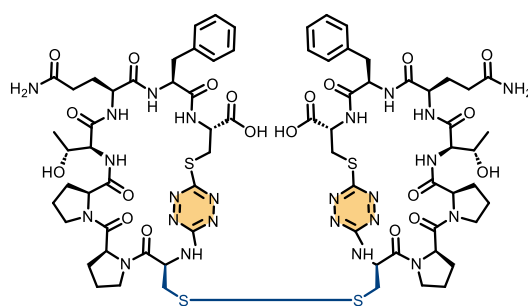

**B36a**

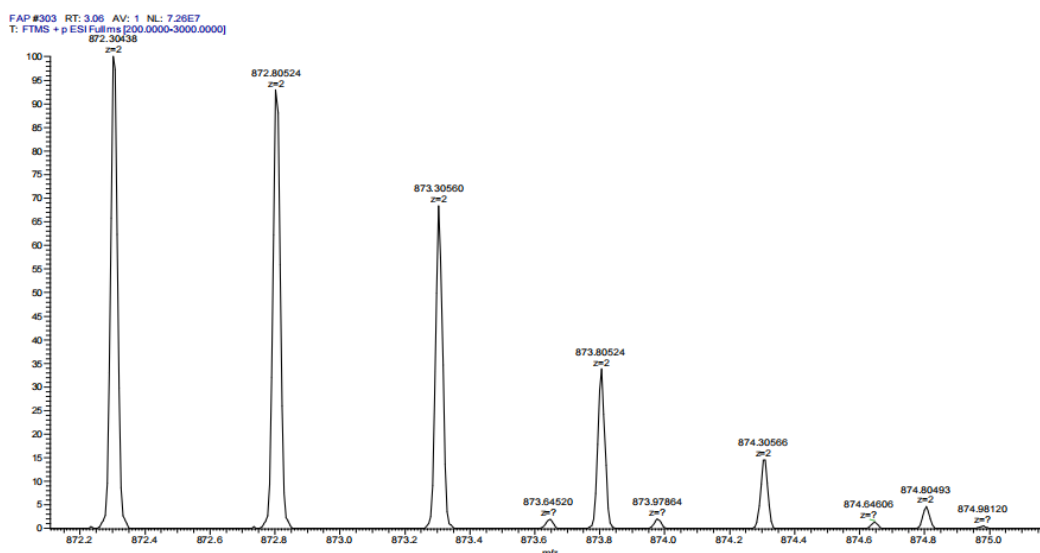

| m/z       | Theo. Mass | Delta (ppm) | RDB equiv. | Composition        |                      |
|-----------|------------|-------------|------------|--------------------|----------------------|
| 872.30438 | 872.30523  | -0.97       | 37         | C72 H96 O20 N24 S4 | [M+2H] <sup>2+</sup> |

**Fig S223.** Q-TOF-HRMS spectrum of **B36a**. HRMS (ES<sup>+</sup>) m/z: [M+2H]<sup>2+</sup> calcd for C<sub>72</sub>H<sub>94</sub>N<sub>24</sub>O<sub>20</sub>S<sub>4</sub> 872.30, found 872.30.

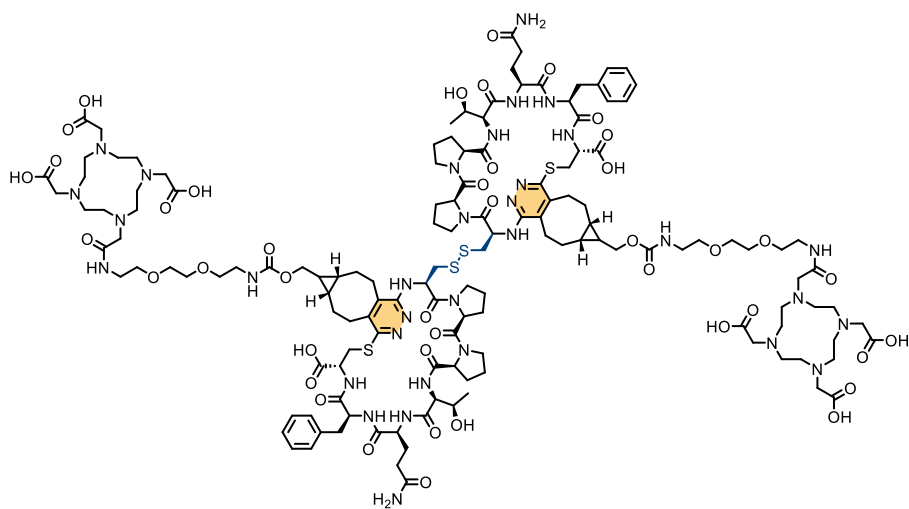

**FAP-B36**

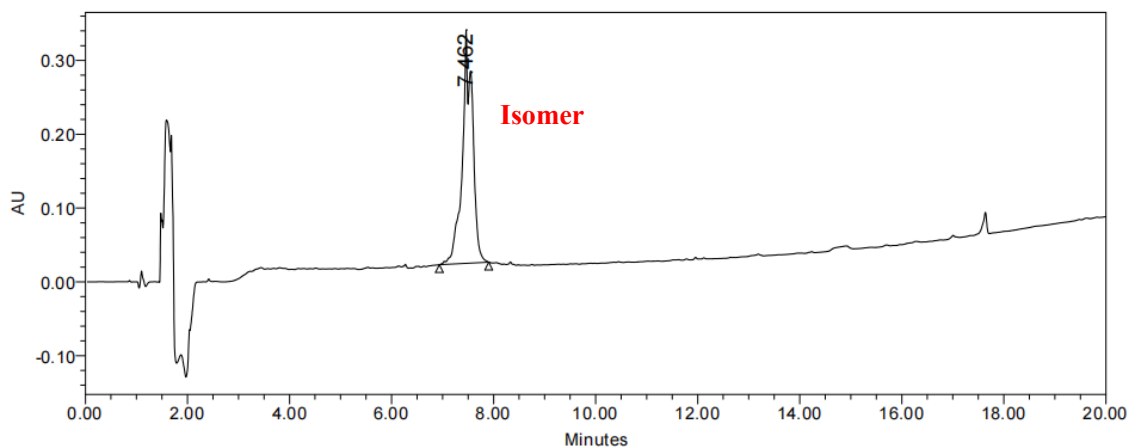

Channel: 2998 Ch1 220nm@4.8nm; Processed Channel: 2998 Ch1 220nm@4.8nm; Result Id: 39043; Processing Method: FAPBCNDOTA

Processed Channel Descr.: 2998 Ch1 220nm@4.8nm

|   | Processed Channel Descr. | RT    | Area    | % Area | Height |
|---|--------------------------|-------|---------|--------|--------|
| 1 | 2998 Ch1 220nm@4.8nm     | 7.462 | 4418749 | 100.00 | 316357 |

**Fig S224.** HPLC-UV chromatogram at 220 nm of **FAP-B36**. Analytical HPLC using Method B, RT = 7.462 min, the HPLC purity is 99%.

**Analysis Report**

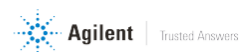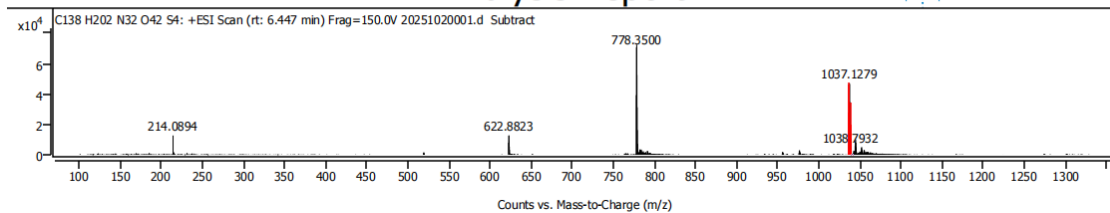

*Spectrum Identification Table*

| Best ID Source | Name | Formula              | Species  | m/z       | Diff (ppm) | CAS | Score | Score (Lib) | Score (DB) | Score (MFG) | Lib/DB |
|----------------|------|----------------------|----------|-----------|------------|-----|-------|-------------|------------|-------------|--------|
| Yes            | MFG  | C138 H202 N32 O42 S4 | (M+3H)+3 | 1036.7923 | 1.20       |     | 99.93 |             |            | 99.93       |        |

**Fig S225.** Q-TOF-HRMS spectrum of **FAP-B36**. HRMS (ES+) m/z: [M+3H]<sup>3+</sup> calcd for C<sub>138</sub>H<sub>202</sub>N<sub>32</sub>O<sub>42</sub>S<sub>4</sub> 1036.7846, found 1036.7923.

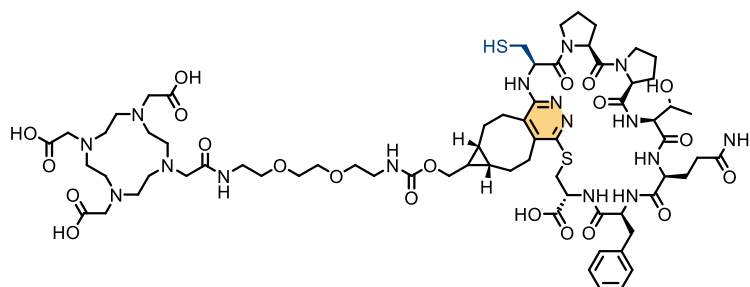

**FAP-B36-r**

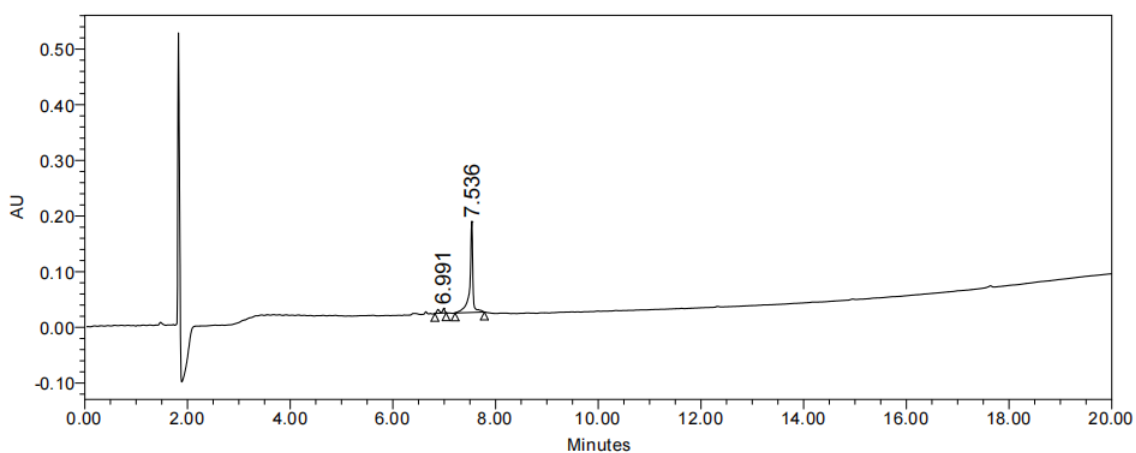

Channel: 2998 Ch1 220nm@4.8nm; Processed Channel: 2998 Ch1 220nm@4.8nm; Result Id: 39045; Processing Method: FAPBCNDOTATCEP

Processed Channel Descr.: 2998 Ch1 220nm@4.8nm

|   | Processed Channel Descr. | RT    | Area   | % Area | Height |
|---|--------------------------|-------|--------|--------|--------|
| 1 | 2998 Ch1 220nm@4.8nm     | 6.991 | 48182  | 6.68   | 8349   |
| 2 | 2998 Ch1 220nm@4.8nm     | 7.536 | 673236 | 93.32  | 163846 |

**Fig S226.** HPLC-UV chromatogram at 220 nm of **FAP-B36-r**. Analytical HPLC using Method B, RT = 7.536 min, the HPLC purity is 93%.

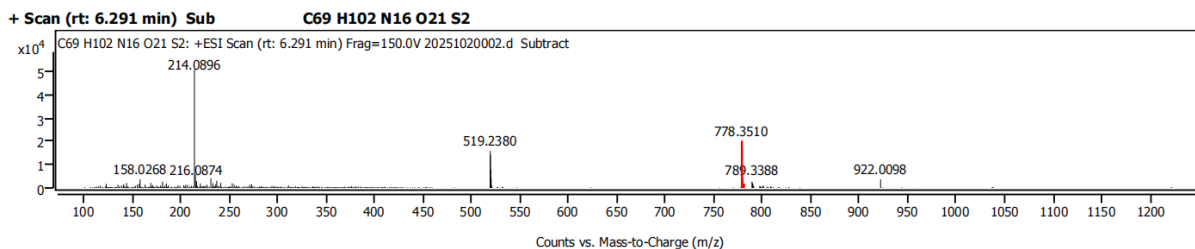

## Analysis Report

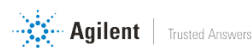

### Spectrum Identification Table

| Best ID Source | Name | Formula                                                                         | Species              | m/z      | Diff (ppm) | CAS | Score | Score (Lib) | Score (DB) | Score (MFG) | Lib/DB |
|----------------|------|---------------------------------------------------------------------------------|----------------------|----------|------------|-----|-------|-------------|------------|-------------|--------|
| Yes MFG        |      | C <sub>69</sub> H <sub>102</sub> N <sub>16</sub> O <sub>21</sub> S <sub>2</sub> | (M+2H) <sup>2+</sup> | 778.3510 | 1.79       |     | 99.90 |             |            | 99.90       |        |

**Fig S227.** Q-TOF-HRMS spectrum of **FAP-B36-r**. HRMS (ES+) m/z: [M+2H]<sup>2+</sup> calcd for C<sub>69</sub>H<sub>102</sub>N<sub>16</sub>O<sub>21</sub>S<sub>2</sub> 778.3424, found 778.3510.



## 8.2 Radiolabeling

**FAP-B36**, **FAP-B36-r**, and **FAP-B36-m** (20 µg) was first dissolved in 0.01 mL of H<sub>2</sub>O, and then the peptide solution was placed in 1 mL of 0.25 M sodium acetate. Another 4 mL of 0.05 M hydrochloric acid solution was passed through a <sup>68</sup>Ge/<sup>68</sup>Ga generator to generate a hydrochloric acid solution containing <sup>68</sup>Ga. <sup>68</sup>Ga was mixed with the precursor solution at a ratio of 1:4 and incubated at 100 °C for 15 min. After radiolabeling, the cooled crude reaction was passed through a preconditioned C-18 Sep-Pak cartridge and eluted with 200ul of ethanol and the solution was analyzed for radiolabeling purity by RP-HPLC (Radio column, YMC-Triat-C18 (4.6 mm i.d. 150 mm, 5 mm); solvent A, deionized water; solvent B, acetonitrile (0.1% trifluoroacetic acid (TFA))); flow time, 15 min with acetonitrile from 10% to 100%.

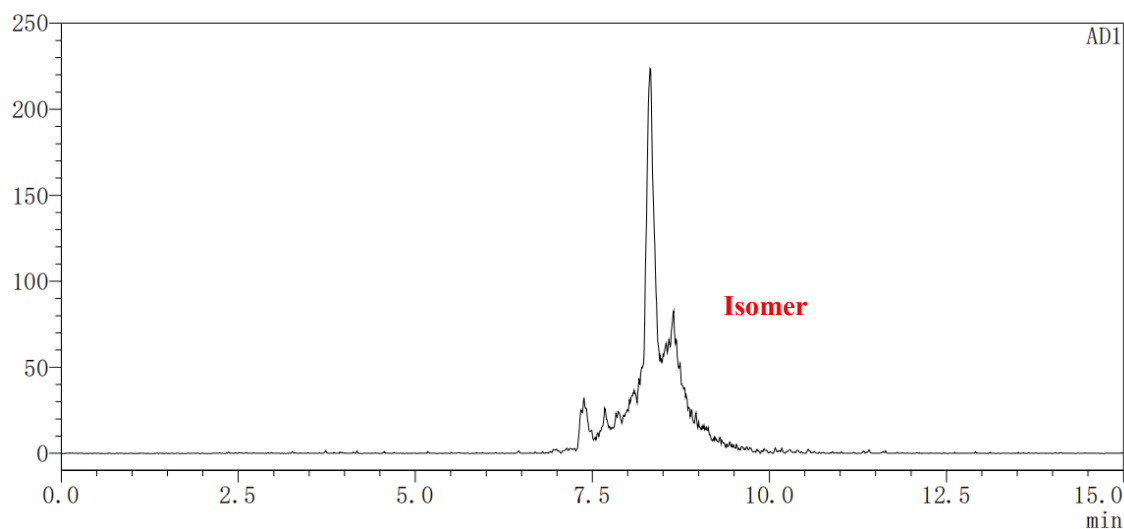

**Fig S230.** The radio-HPLC of [<sup>68</sup>Ga]-FAP-B36.

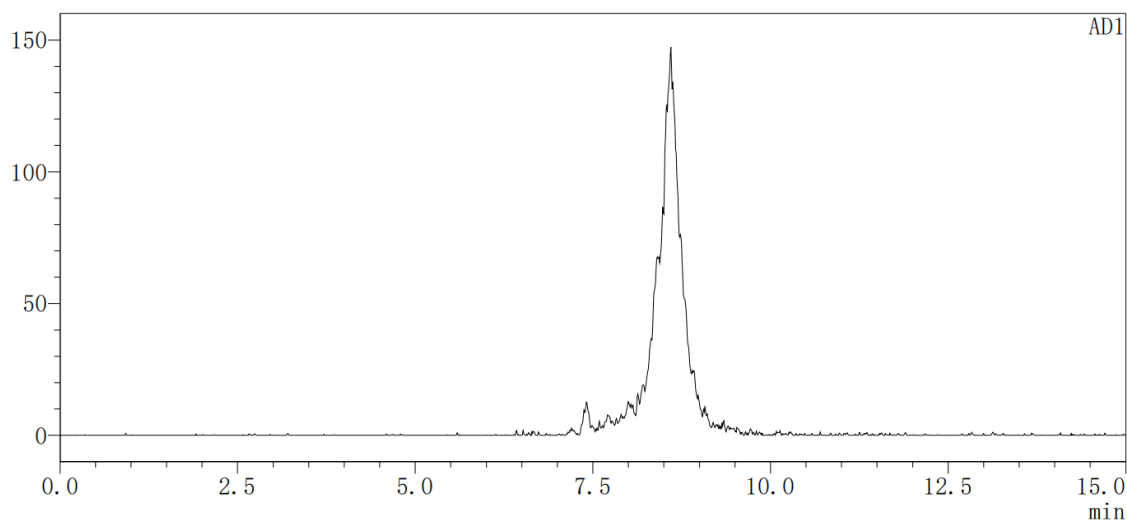

**Fig S231.** The radio-HPLC of [<sup>68</sup>Ga]-FAP-B36-r.

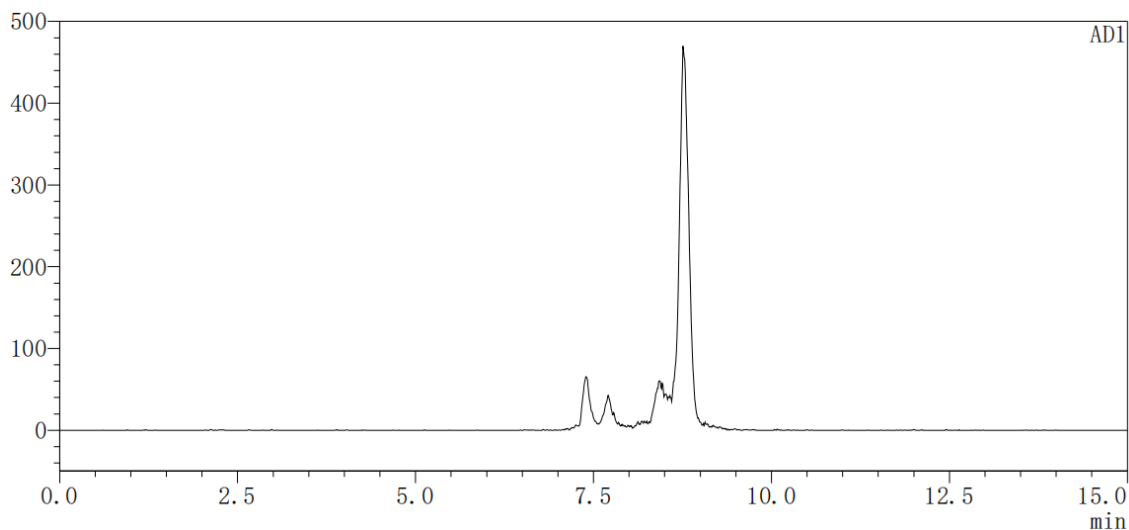

**Fig S232.** The radio-HPLC of [<sup>68</sup>Ga]-FAP-B36-m.

### 8.3 Lipid-water partition coefficient

[<sup>68</sup>Ga]-FAP-B36, [<sup>68</sup>Ga]- FAP-B36-r, and [<sup>68</sup>Ga]- FAP-B36-m (0.1 MBq each) were added to a mixture containing 5.0 mL of H<sub>2</sub>O and 5.0 mL of n-octanol. The mixture was vigorously shaken for 2 min and then allowed to stand for 1 h until complete phase separation was observed (vigorous shaking should be avoided during the standing period). Using a pipette, four samples (0.1 mL each) were collected from both the upper (n-octanol) and lower (H<sub>2</sub>O) layers. The radioactivity of each layer was measured with a gamma counter. The lipid-water partition coefficient was calculated as  $\text{LogP} = \text{Log} (\text{n-octanol counts} / \text{H}_2\text{O counts})$ , the lipid-water partition coefficient of [<sup>68</sup>Ga]-FAP-B36, [<sup>68</sup>Ga]- FAP-B36-r, [<sup>68</sup>Ga]- FAP-B36-m are shown in **Tab S15**.

**Tab S15.** The lipid-water partition coefficient of [<sup>68</sup>Ga]-FAP-B36 to [<sup>68</sup>Ga]-FAP-B36-m

| Name                          | <sup>68</sup> Ga water | <sup>68</sup> Ga n-octanol | LogP  |
|-------------------------------|------------------------|----------------------------|-------|
| [ <sup>68</sup> Ga]-FAP-B36   | 493                    | 273052.3                   | -2.74 |
| [ <sup>68</sup> Ga]-FAP-B36   | 514                    | 279211.5                   | -2.73 |
| [ <sup>68</sup> Ga]-FAP-B36   | 421                    | 277518.5                   | -2.82 |
| [ <sup>68</sup> Ga]-FAP-B36-r | 1107.13                | 819223.3                   | -2.87 |
| [ <sup>68</sup> Ga]-FAP-B36-r | 1144                   | 830946.9                   | -2.86 |
| [ <sup>68</sup> Ga]-FAP-B36-r | 1407                   | 817239.5                   | -2.76 |
| [ <sup>68</sup> Ga]-FAP-B36-m | 434                    | 275285.9                   | -2.80 |
| [ <sup>68</sup> Ga]-FAP-B36-m | 1174                   | 254193.9                   | -2.34 |
| [ <sup>68</sup> Ga]-FAP-B36-m | 1125.9                 | 262411.4                   | -2.37 |

## 8.4 Western Blot

PC12 cells with high FAP expression were lysed via radioimmunoprecipitation assay (RIPA, R0010, Solarbio, Beijing, China) buffer, sonicated, and then centrifuged (12000 rpm, 20 min, 4 °C), after which the supernatants were collected. The total protein concentration was measured via a bicinchoninic acid (BCA) Kit (P0012, Beyotime, Shanghai, China). First, electrophoresis was performed via sodium dodecyl sulfate–polyacrylamide gel electrophoresis (SDS–PAGE) at 90 V for 20 min, followed by further electrophoresis for 40 min at 126 V. Then, membrane transfer was performed, and the proteins were transferred to polyvinylidene difluoride (PVDF) membranes for 50 min in an ice bath at 400 mA. After being blocked at RT for 3 h in 5% skim milk, the PVDF membranes were incubated with anti-FAP primary antibody (1:1000, diluted in 5% skim milk) overnight at 4 °C. Then, the secondary antibody (1:5000, diluted in 1% TBST) against the primary antibody was added, and the samples were incubated for 1 h at RT. After the samples were washed three times with 1% Tris-buffered saline with Tween (TBST, T1082, Solarbio, Beijing, China), immunoblotting was performed via a Western blotting detection system after treatment with enhanced chemiluminescence reagent (ECL, E411-04, Nanjing, China).

## 8.5 Tumor cell line culture and tumor-bearing mouse model establishment

The PC12 cell line (characterized by high FAP expression) was obtained from Procell Life Science & Technology Co., Ltd. and utilized as the tumor cell model. Cells were maintained in high-glucose DMEM supplemented with 10% fetal bovine serum, 100 U/mL penicillin, and 50 µg/mL streptomycin. The culture medium was refreshed every two days, and cells were passaged upon reaching 80%–90% confluency.

For the *in vivo* studies, BALB/c nude mice (4–5 weeks old) were sourced from GemPharmatech (Beijing, China). To establish the tumor-bearing model, PC12 cells ( $1 \times 10^6$  cells/mouse, 1 tumor/mouse) were subcutaneously injected into the left flank of each mouse. Tumor growth was monitored biennially. Generally, PET imaging was performed 10 days after transplantation.

All animal experiments and protocols were strictly performed in accordance with the instructions of the Committee for the Care and Use of Laboratory Animals and were

approved by the Institutional Animal Care and Use Committee (IACUC) of the Institute of Materia Medica, Chinese Academy of Medical Sciences & Peking Union Medical College (IMM-S-25-0053).

## 8.6 Small Animal PET/CT Study in Tumor-Bearing Mice

PC12 tumor-bearing nude mice models (n = 3) were injected with 100  $\mu$ Ci of [ $^{68}\text{Ga}$ ]-FAP-B36, [ $^{68}\text{Ga}$ ]- FAP-B36-r, and [ $^{68}\text{Ga}$ ]- FAP-B36-m anesthetized under isoflurane to being placed on PET/CT scanner (Imviscan, France). The whole-body PET images were acquired at 30, 60, 120 and 240 min p.i. The analysis of PET/CT data was performed at the IMALYTICS Preclinical 3.1 with the decay correction of radioactivity. The uptake levels of radiotracers in tumors and organs of interest are presented as percentage of the injected dose per gram (%ID/g).

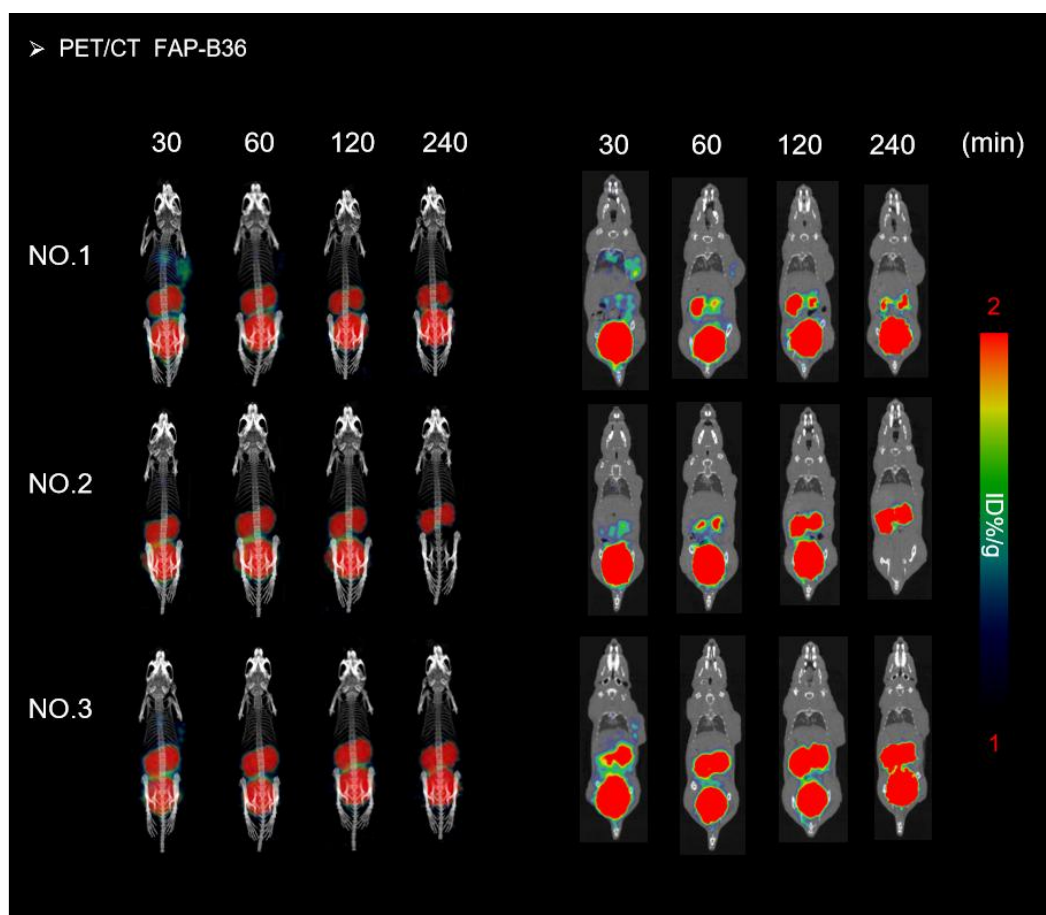

Fig S233. PET/CT images of BALB/c nude mice with [ $^{68}\text{Ga}$ ]-FAP-B36.

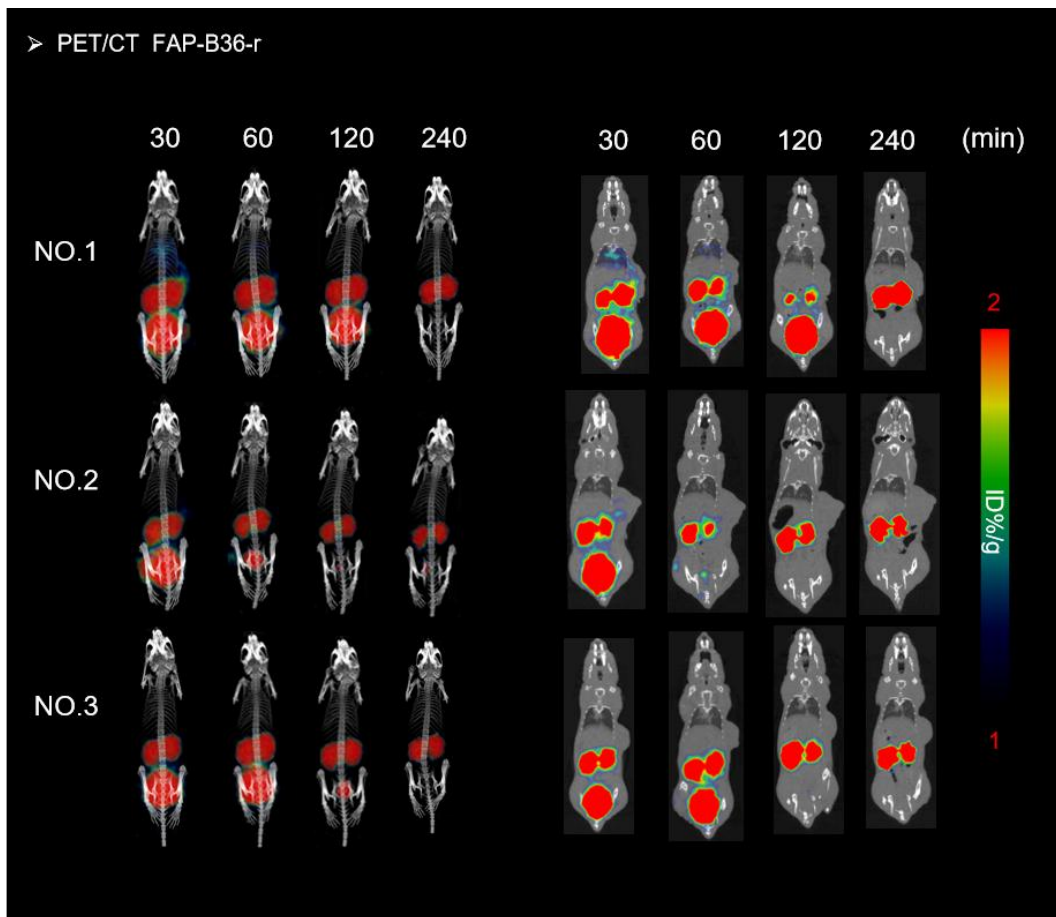

Fig S234. PET/CT images of BALB/c nude mice with [<sup>68</sup>Ga]-FAP-B36-r.

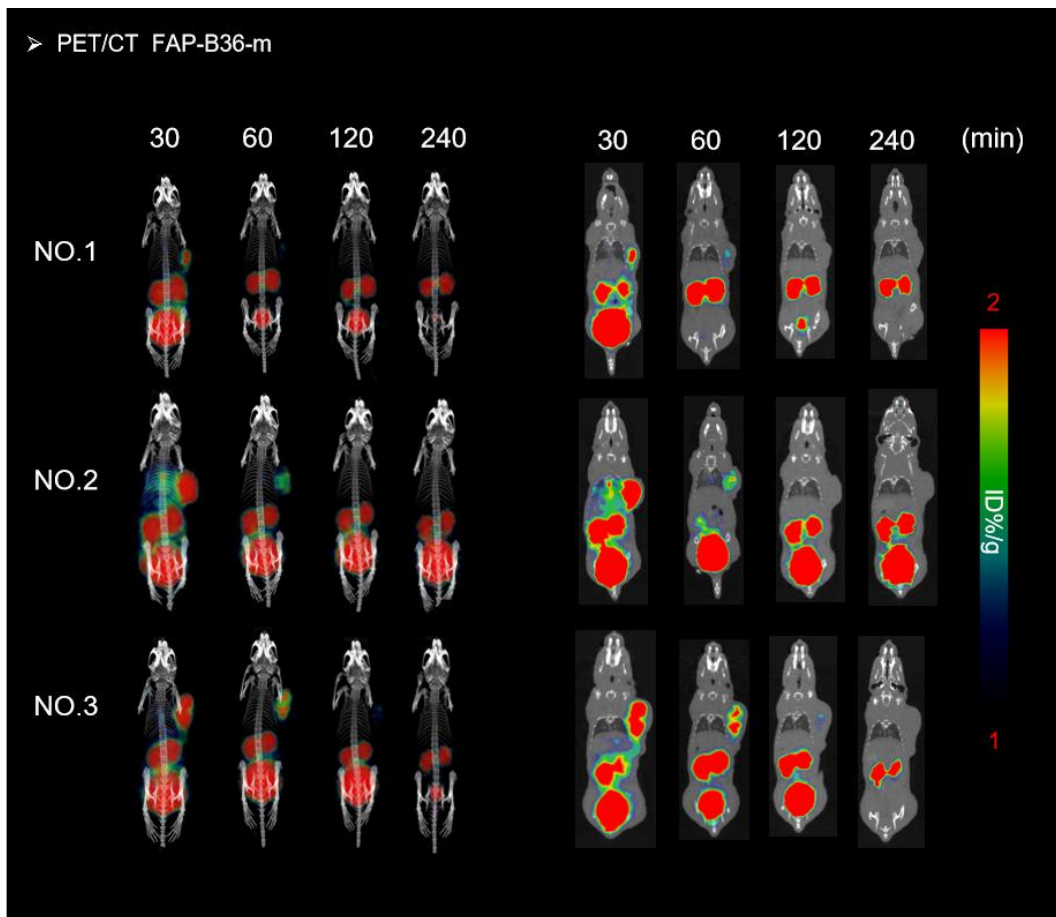

Fig S235. PET/CT images of BALB/c nude mice with [<sup>68</sup>Ga]-FAP-B36-m.

**Tab S16.** The uptake values of [<sup>68</sup>Ga]-FAP-B36 to [<sup>68</sup>Ga]- FAP-B36-r in the heart, liver, kidney, and tumor tissues of PC12 tumor-bearing nude mice at 0.5, 1, 2, and 4 h post-administration.

| Name                                    | Number | Tumor (%ID/g) |       |        |       | Liver (%ID/g) |       |       |       | Kidney (%ID/g) |       |       |       | Heart (%ID/g) |       |        |       |
|-----------------------------------------|--------|---------------|-------|--------|-------|---------------|-------|-------|-------|----------------|-------|-------|-------|---------------|-------|--------|-------|
|                                         |        | 0.5h          | 1h    | 2h     | 4h    | 0.5h          | 1h    | 2h    | 4h    | 0.5h           | 1h    | 2h    | 4h    | 0.5h          | 1h    | 2h     | 4h    |
| <b>[<sup>68</sup>Ga]-<br/>FAP-B36</b>   | 1      | 1.878         | 1.440 | 1.289  | 1.628 | 0.930         | 0.748 | 0.644 | 0.521 | 4.517          | 3.774 | 3.734 | 3.839 | 1.189         | 0.870 | 0.580  | 0.544 |
|                                         | 2      | 0.986         | 0.844 | 0.809  | 0.940 | 0.816         | 0.652 | 0.584 | 0.559 | 4.519          | 4.423 | 4.437 | 4.693 | 0.8998        | 0.645 | 0.5482 | 0.477 |
|                                         | 3      | 1.635         | 1.076 | 1.043  | 1.267 | 1.066         | 0.731 | 0.629 | 0.578 | 7.209          | 6.380 | 6.805 | 6.330 | 1.142         | 0.725 | 0.478  | 0.413 |
| <b>[<sup>68</sup>Ga]-<br/>FAP-B36-m</b> | 1      | 1.460         | 1.256 | 0.8104 | 1.175 | 0.952         | 0.759 | 0.523 | 0.384 | 6.551          | 6.087 | 6.120 | 6.089 | 1.043         | 0.848 | 0.530  | 0.377 |
|                                         | 2      | 1.449         | 1.289 | 0.858  | 0.774 | 0.785         | 0.627 | 0.473 | 0.394 | 3.943          | 3.556 | 3.384 | 2.969 | 0.726         | 0.706 | 0.371  | 0.269 |
|                                         | 3      | 0.994         | 0.998 | 0.785  | 0.850 | 0.686         | 0.652 | 0.470 | 0.333 | 4.444          | 4.845 | 4.099 | 3.914 | 0.747         | 0.675 | 0.491  | 0.378 |
| <b>[<sup>68</sup>Ga]-<br/>FAP-B36-r</b> | 1      | 2.488         | 1.615 | 1.211  | 1.230 | 0.900         | 0.607 | 0.498 | 0.403 | 4.211          | 3.295 | 2.882 | 3.240 | 0.970         | 0.566 | 0.406  | 0.312 |
|                                         | 2      | 3.434         | 1.986 | 1.239  | 1.077 | 1.312         | 0.832 | 0.590 | 0.508 | 4.22           | 2.931 | 2.784 | 3.013 | 1.409         | 0.837 | 0.499  | 0.363 |
|                                         | 3      | 2.963         | 2.379 | 1.666  | 1.316 | 1.041         | 0.790 | 0.540 | 0.450 | 3.689          | 3.077 | 2.701 | 2.731 | 1.171         | 0.786 | 0.443  | 0.319 |

## 9. N<sup>2</sup>-level expansion of peptide library throughput and topological diversity via 3,6-DCT mediated cyclodimerization

Peptides with different sequences, lengths, and biological activities were randomly combined and subjected to 3,6-DCT-mediated cyclodimerization reactions under equimolar concentrations and standard reaction conditions.

### Example procedure (Standard reaction conditions):

The dried peptide substrates (a total of  $n$  peptides, bis-cysteine peptides, each containing one N-cysteine, 1.0 equiv. per peptide) were accurately weighed together and dissolved in an appropriate amount of PBS (20 mM, pH = 9.0) to ensure that the concentration of each peptide in the reaction mixture was 0.56 mM. To this solution, 3,6-DCT ( $n$  equiv. in total, corresponding to 1.0 equiv. relative to each peptide) dissolved in acetonitrile (1/9 of the buffer volume) was added. The final concentrations in the reaction were 0.5 mM for each peptide,  $0.5 \cdot n$  mM for 3,6-DCT, and 10% acetonitrile, followed by thorough mixing. The reaction mixture was shaken at 25 °C and 800 rpm for 1 h on a thermostatic shaker. After completion, 50  $\mu$ L of the reaction mixture was collected, and 10  $\mu$ L was injected into the UPLC-MS for analysis.

For **reaction 1**, The dried peptide substrates (**L1** and **L35**, 1.0 equiv. per peptide) were accurately weighed together and dissolved in an appropriate amount of PBS (20 mM, pH = 9.0) to ensure that the concentration of each peptide in the reaction mixture was 0.56 mM. To this solution, 3,6-DCT (2 equiv.) dissolved in acetonitrile (1/9 of the buffer volume) was added. The final concentrations in the reaction were 0.5 mM for each peptide, 1 mM for 3,6-DCT, and 10% acetonitrile, followed by thorough mixing. The reaction mixture was shaken at 25 °C and 800 rpm for 1 h on a thermostatic shaker. After completion, 50  $\mu$ L of the reaction mixture was collected, and 10  $\mu$ L was injected into the UPLC-MS for analysis.

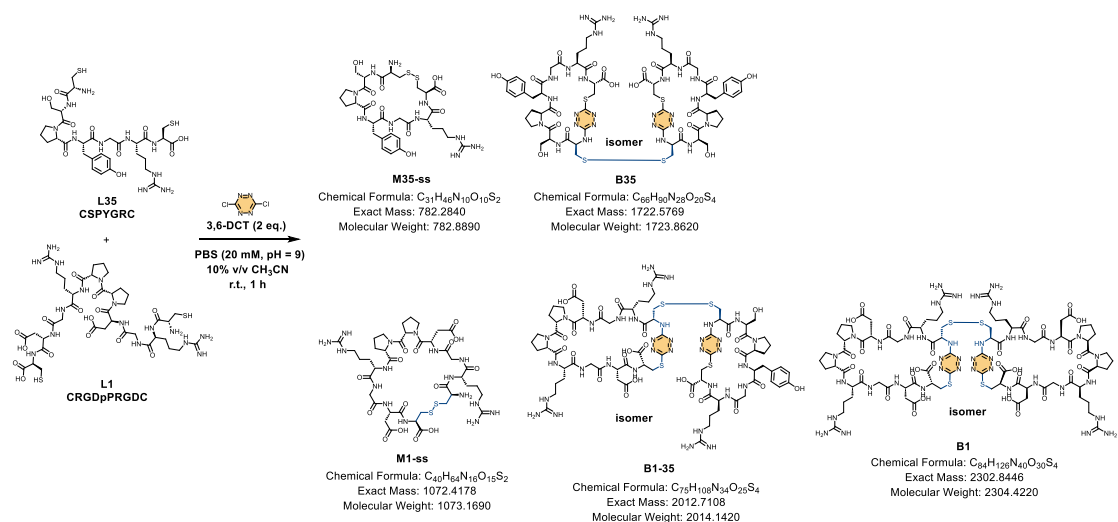

## Reaction 1

### intramolecular disulfide-bridged products

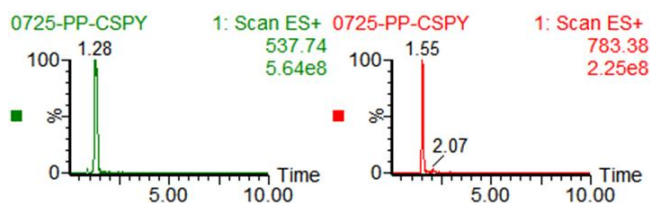

### cyclodimerization products

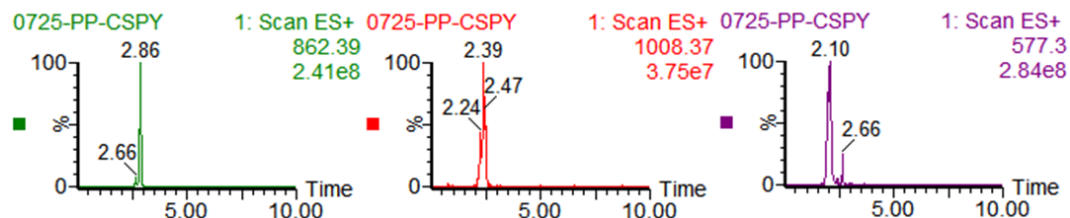

**Fig S236.** LRMS spectrum of intramolecular disulfide-bridged products and cyclodimerization products in **reaction 1**. Extract mass chromatograms from full scan data.

**Tab S17.** The LRMS spectrum analysis of **reaction 1**.

| Sequence                         | Products | m/z           |                              |
|----------------------------------|----------|---------------|------------------------------|
|                                  |          | Theoretical   | Measured                     |
| L35 (CSPYGRG)<br>L1 (CRGDpPRGDC) | M35-ss   | 783.89 (z=1)  | 783.38 (z=1)                 |
|                                  | M1-ss    | 1074.17 (z=1) | 537.74 (z=2)                 |
|                                  | B35      | 1724.86 (z=1) | 862.39 (z=2)                 |
|                                  | B35-1    | 2015.14 (z=1) | 1008.37 (z=2) ; 672.67 (z=3) |
|                                  | B1       | 2305.42 (z=1) | 769.45 (z=3) ; 577.30 (z=4)  |

## Reaction 2

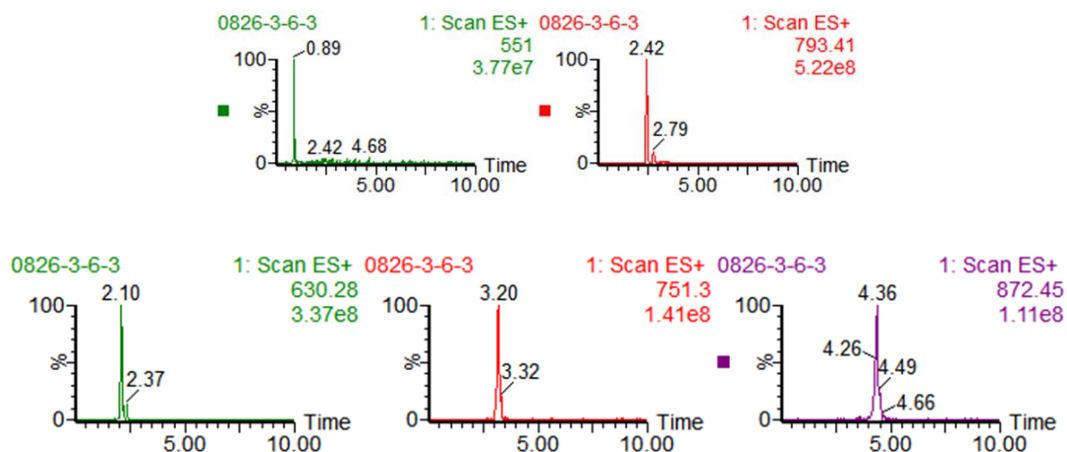

**Fig S237.** LRMS spectrum of intramolecular disulfide-bridged products and cyclodimerization products in **reaction 2**. Extract mass chromatograms from full scan data.

**Tab S18.** The LRMS spectrum analysis of **reaction 2**.

| Sequence                     | Products | m/z           |                              |
|------------------------------|----------|---------------|------------------------------|
|                              |          | Theoretical   | Measured                     |
| L25 (CRGDC)<br>L36 (CPPTQFC) | M25-ss   | 551.61 (z=1)  | 551.05 (z=1)                 |
|                              | M36-ss   | 793.92 (z=1)  | 793.41 (z=1)                 |
|                              | B25      | 1260.30 (z=1) | 630.28 (z=2)                 |
|                              | B36-25   | 1502.61 (z=1) | 751.30 (z=2)                 |
|                              | B36      | 1744.93 (z=1) | 1744.84 (z=1) ; 872.45 (z=2) |

### Reaction 3

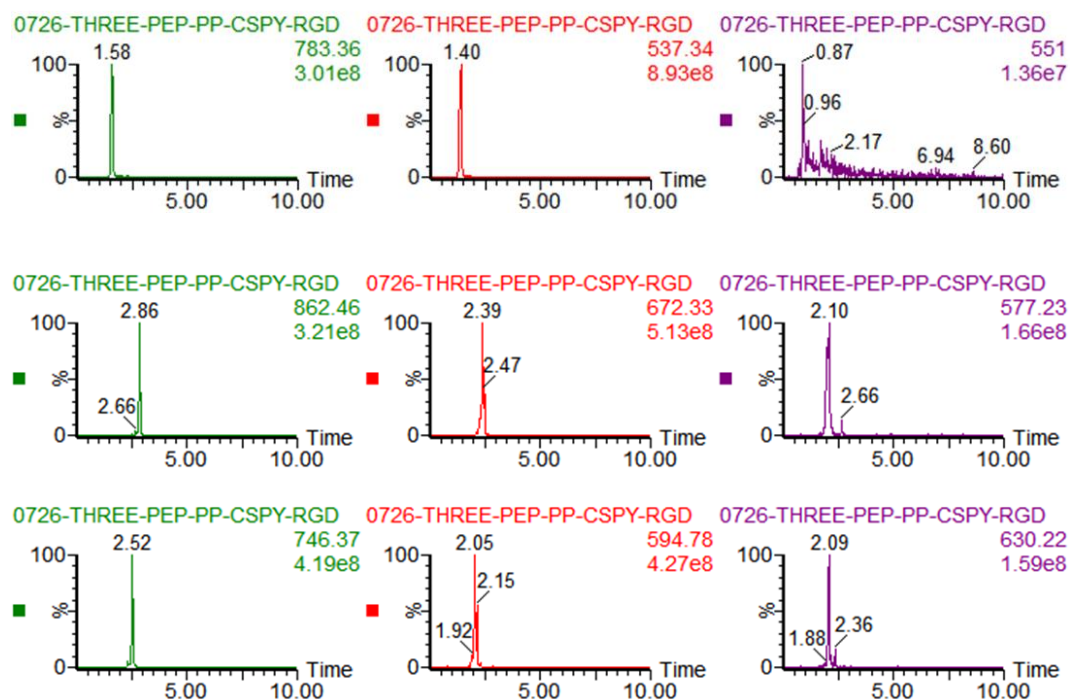

**Fig S238.** LRMS spectrum of intramolecular disulfide-bridged products and cyclodimerization products in **reaction 3**. Extract mass chromatograms from full scan data.

**Tab S19.** The LRMS spectrum analysis of **reaction 3**.

| Sequence                                        | Products | m/z           |                              |
|-------------------------------------------------|----------|---------------|------------------------------|
|                                                 |          | Theoretical   | Measured                     |
| L35 (CSPYGRC)<br>L1 (CRGDpPRGDC)<br>L25 (CRGDC) | M35-ss   | 783.89 (z=1)  | 783.36 (z=1)                 |
|                                                 | M1-ss    | 1074.17 (z=1) | 537.34 (z=2)                 |
|                                                 | M25-ss   | 551.61 (z=1)  | 551.05 (z=1)                 |
|                                                 | B35      | 1724.86 (z=1) | 862.46 (z=2)                 |
|                                                 | B35-1    | 2015.14 (z=1) | 1008.04 (z=2) ; 672.33 (z=3) |
|                                                 | B1       | 2305.42 (z=1) | 769.52 (z=3) ; 577.23 (z=4)  |
|                                                 | B35-25   | 1492.58 (z=1) | 746.37 (z=2)                 |
|                                                 | B25-1    | 1782.86 (z=1) | 891.41 (z=2) ; 594.78 (z=3)  |
|                                                 | B25      | 1260.30 (z=1) | 630.22 (z=2)                 |

### Reaction 4

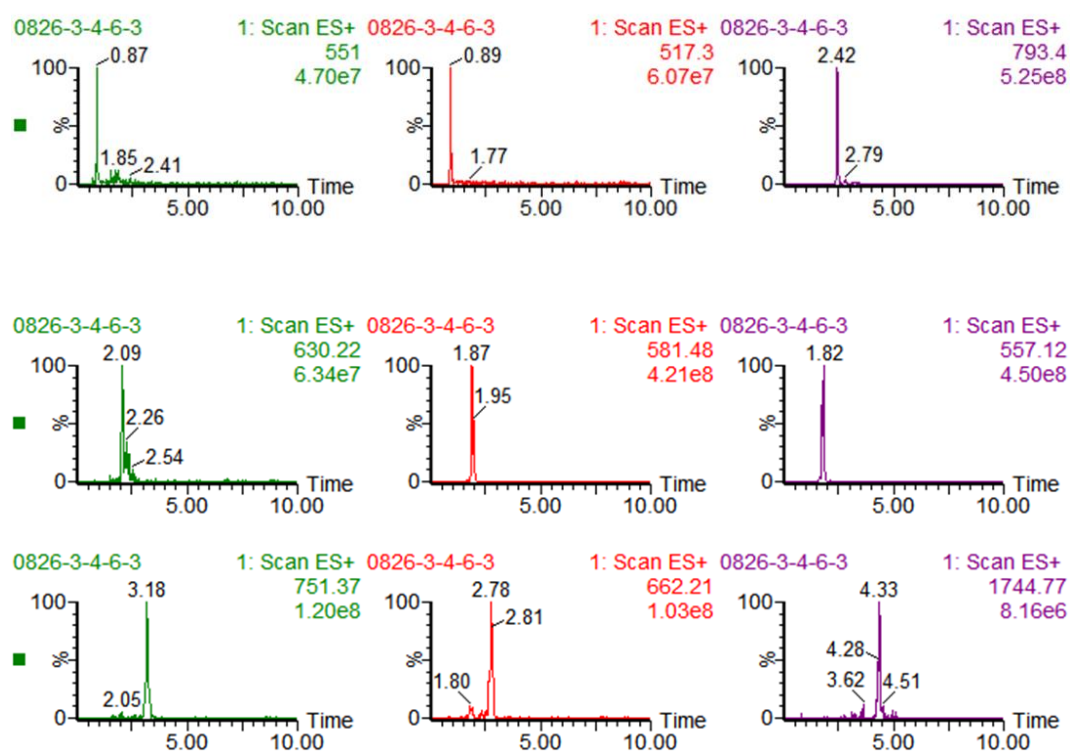

**Fig S239.** LRMS spectrum of intramolecular disulfide-bridged products and cyclodimerization products in **reaction 4**. Extract mass chromatograms from full scan data.

**Tab S20.** The LRMS spectrum analysis of **reaction 4**.

| Sequence                                        | Products | m/z           |                              |
|-------------------------------------------------|----------|---------------|------------------------------|
|                                                 |          | Theoretical   | Measured                     |
| L25 (CRGDC)<br>L9 (CRGDpGRGDC)<br>L36 (CPPTQFC) | M25-ss   | 551.61 (z=1)  | 551.05 (z=1)                 |
|                                                 | M9-ss    | 1034.10 (z=1) | 517.30 (z=2)                 |
|                                                 | M36-ss   | 793.92 (z=1)  | 793.40 (z=1)                 |
|                                                 | B25      | 1260.30 (z=1) | 630.22 (z=2)                 |
|                                                 | B25-9    | 1742.79 (z=1) | 871.31 (z=2) ; 581.48 (z=3)  |
|                                                 | B9       | 2225.29 (z=1) | 742.25 (z=3) ; 557.12 (z=4)  |
|                                                 | B36-25   | 1502.61 (z=1) | 751.37 (z=2)                 |
|                                                 | B36-9    | 1985.11 (z=1) | 992.92 (z=2) ; 662.21 (z=3)  |
|                                                 | B36      | 1744.93 (z=1) | 1744.77 (z=1) ; 872.45 (z=2) |

### Reaction 5

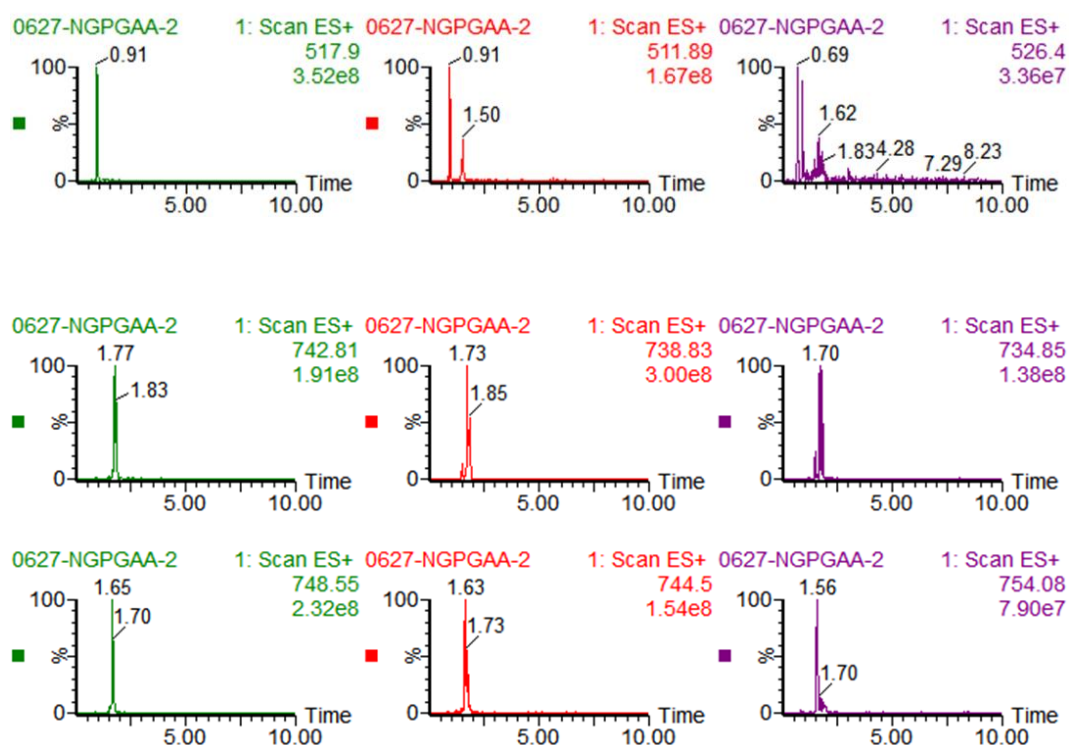

**Fig S240.** LRMS spectrum of intramolecular disulfide-bridged products and cyclodimerization products in **reaction 5**. Extract mass chromatograms from full scan data.

**Tab S21.** The LRMS spectrum analysis of **reaction 5**.

| Sequence        | Products | m/z           |              |
|-----------------|----------|---------------|--------------|
|                 |          | Theoretical   | Measured     |
|                 | M9-ss    | 1034.10 (z=1) | 517.90 (z=2) |
|                 | M6-ss    | 1022.09 (z=1) | 511.89 (z=2) |
|                 | M8-ss    | 1051.90 (z=1) | 526.40 (z=2) |
| L9 (CRGDPGRGDC) | B9       | 2225.29 (z=1) | 742.81 (z=3) |
| L6 (CRGDAARGDC) | B9-6     | 2213.28 (z=1) | 738.83 (z=3) |
| L8 (CRGDNGRGDC) | B6       | 2201.27 (z=1) | 734.85 (z=3) |
|                 | B9-8     | 2242.28 (z=1) | 748.55 (z=3) |
|                 | B8-6     | 2230.27 (z=1) | 744.50 (z=3) |
|                 | B8       | 2259.27 (z=1) | 754.08 (z=3) |

## Reaction 6

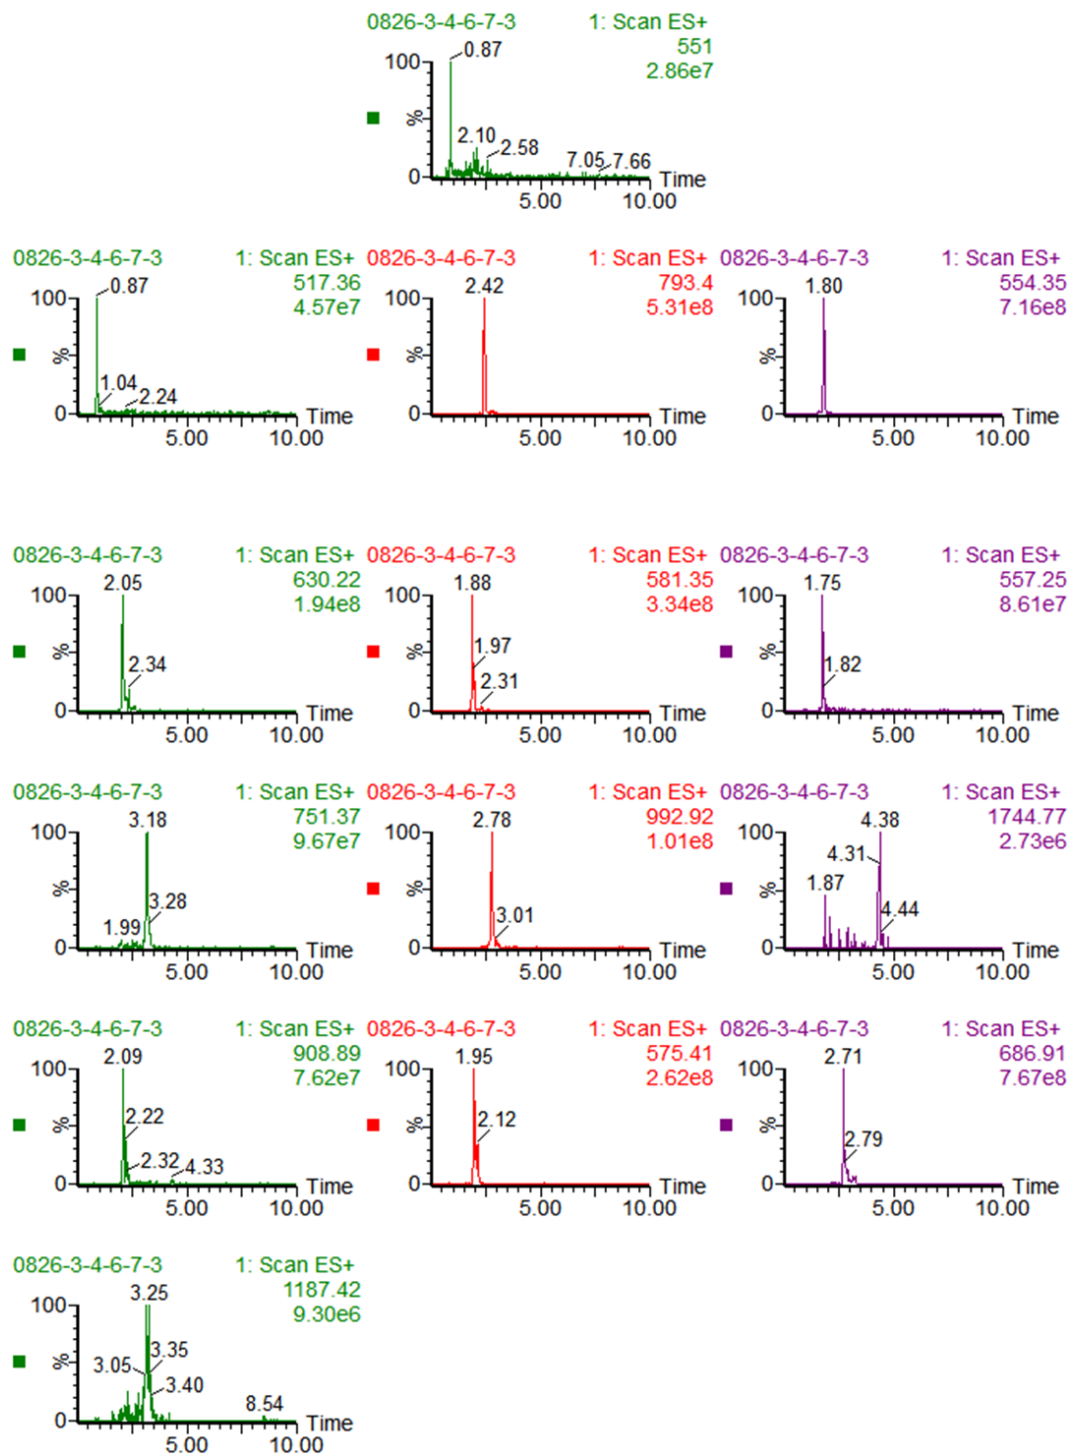

**Fig S241.** LRMS spectrum of intramolecular disulfide-bridged products and cyclodimerization products in **reaction 6**. Extract mass chromatograms from full scan data.

**Tab S22.** The LRMS spectrum analysis of **reaction 6**.

| Sequence        | Products | m/z           |                              |
|-----------------|----------|---------------|------------------------------|
|                 |          | Theoretical   | Measured                     |
|                 | M25-ss   | 551.61 (z=1)  | 551.05 (z=1)                 |
|                 | M9-ss    | 1034.10(z=1)  | 517.36 (z=2)                 |
|                 | M36-ss   | 793.92 (z=1)  | 793.40 (z=1)                 |
|                 | M39-ss   | 1108.32 (z=1) | 554.35 (z=2)                 |
|                 | B25      | 1260.30 (z=1) | 630.22 (z=2)                 |
| L25 (CRGDC)     | B25-9    | 1742.79 (z=1) | 871.16 (z=2) ; 581.35 (z=3)  |
| L9 (CRGDpGRGDC) | B9*      | 2225.29 (z=1) | 742.05 (z=3) ; 557.25 (z=4)  |
| L36 (CPPTQFC)   | B36-25   | 1502.61 (z=1) | 751.37 (z=2)                 |
| L39 (CKSAHFKWC) | B36-9    | 1985.11 (z=1) | 992.92 (z=2)                 |
|                 | B36      | 1744.93 (z=1) | 1744.77 (z=1) ; 872.31 (z=2) |
|                 | B39-25   | 1817.01 (z=1) | 908.89 (z=2) ; 606.19 (z=3)  |
|                 | B39-9    | 2299.05 (z=1) | 767.43 (z=3) ; 575.41 (z=4)  |
|                 | B39-36   | 2059.33 (z=1) | 686.91 (z=3)                 |
|                 | B39*     | 2373.73 (z=1) | 1187.42 (z=2) ; 791.93 (z=3) |

\*The fragment ion signals of **B9** overlapped with those of the intramolecular disulfide-bridged products of **L39**. The fragment ion signals of **B39** overlapped with those of the intramolecular disulfide-bridged products of **L36**.

### Reaction 7

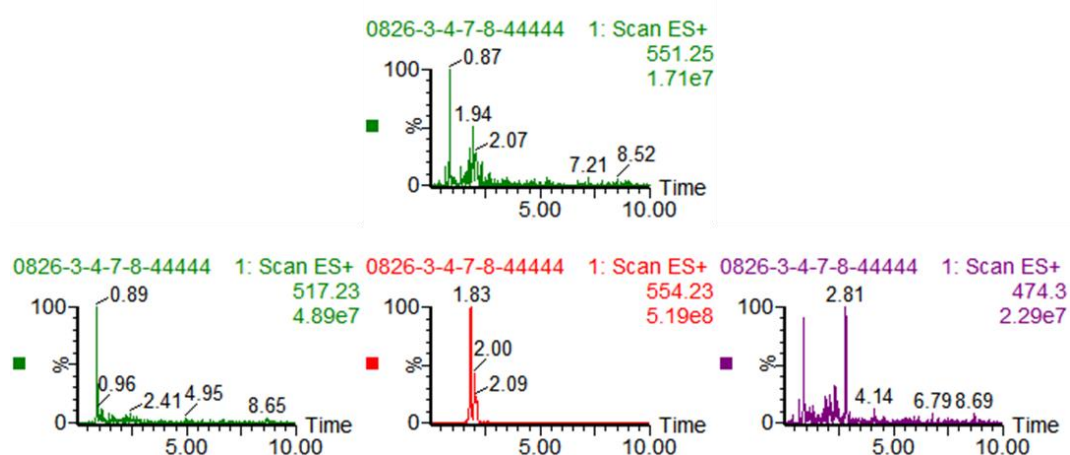

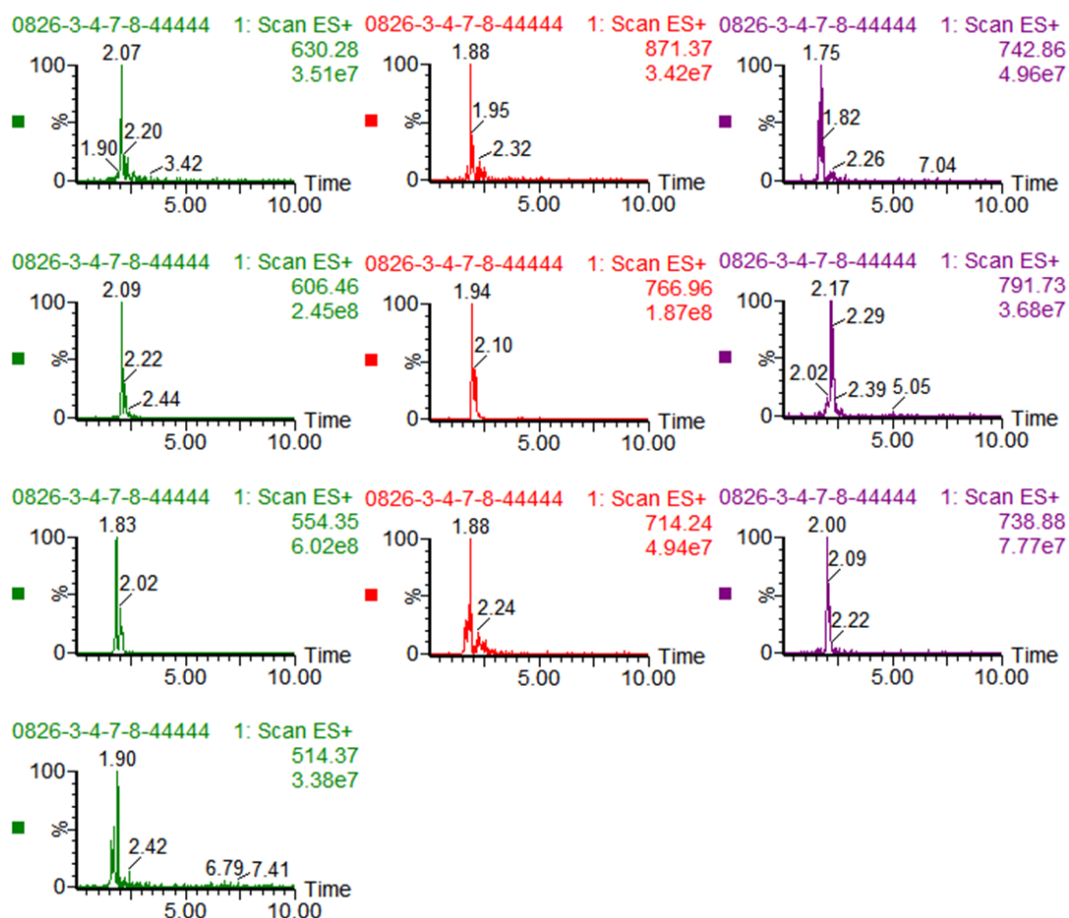

**Fig S242.** LRMS spectrum of intramolecular disulfide-bridged products and cyclodimerization products in **reaction 7**. Extract mass chromatograms from full scan data.

**Tab S23.** The LRMS spectrum analysis of **reaction 7**.

| Sequence        | Products | m/z           |                             |
|-----------------|----------|---------------|-----------------------------|
|                 |          | Theoretical   | Measured                    |
|                 | M25-ss   | 551.61 (z=1)  | 551.25 (z=1)                |
|                 | M9-ss    | 1034.10(z=1)  | 517.23 (z=2)                |
|                 | M39-ss   | 1108.32 (z=1) | 554.23 (z=2)                |
|                 | M38-ss   | 949.04 (z=1)  | 474.3 (z=2)                 |
|                 | B25      | 1260.30 (z=1) | 630.28 (z=2)                |
| L25 (CRGDC)     | B25-9    | 1742.79 (z=1) | 871.37 (z=2) ; 581.89 (z=3) |
| L9 (CRGDpGRGDC) | B9*      | 2225.29 (z=1) | 742.86 (z=3) ; 557.05 (z=4) |
| L39 (CKSAHFKWC) | B39-25   | 1817.01 (z=1) | 908.89 (z=2) ; 606.46 (z=3) |
| L38 (CRGDkGPDC) | B39-9    | 2299.05 (z=1) | 766.96 (z=3) ; 575.61 (z=4) |
|                 | B39      | 2373.73 (z=1) | 791.73 (z=3) ; 594.24 (z=4) |
|                 | B38-25   | 1657.73 (z=1) | 829.05 (z=2) ; 554.35 (z=3) |
|                 | B38-9    | 2140.23 (z=1) | 714.24 (z=3) ; 535.99 (z=4) |
|                 | B39-38   | 2214.44 (z=1) | 738.88 (z=3) ; 554.35 (z=4) |
|                 | B38      | 2055.16 (z=1) | 686.57 (z=3) ; 514.37 (z=4) |

\*The fragment ion signals of **B9** overlapped with those of the intramolecular disulfide-bridged products of **L39**.

## Reaction 8

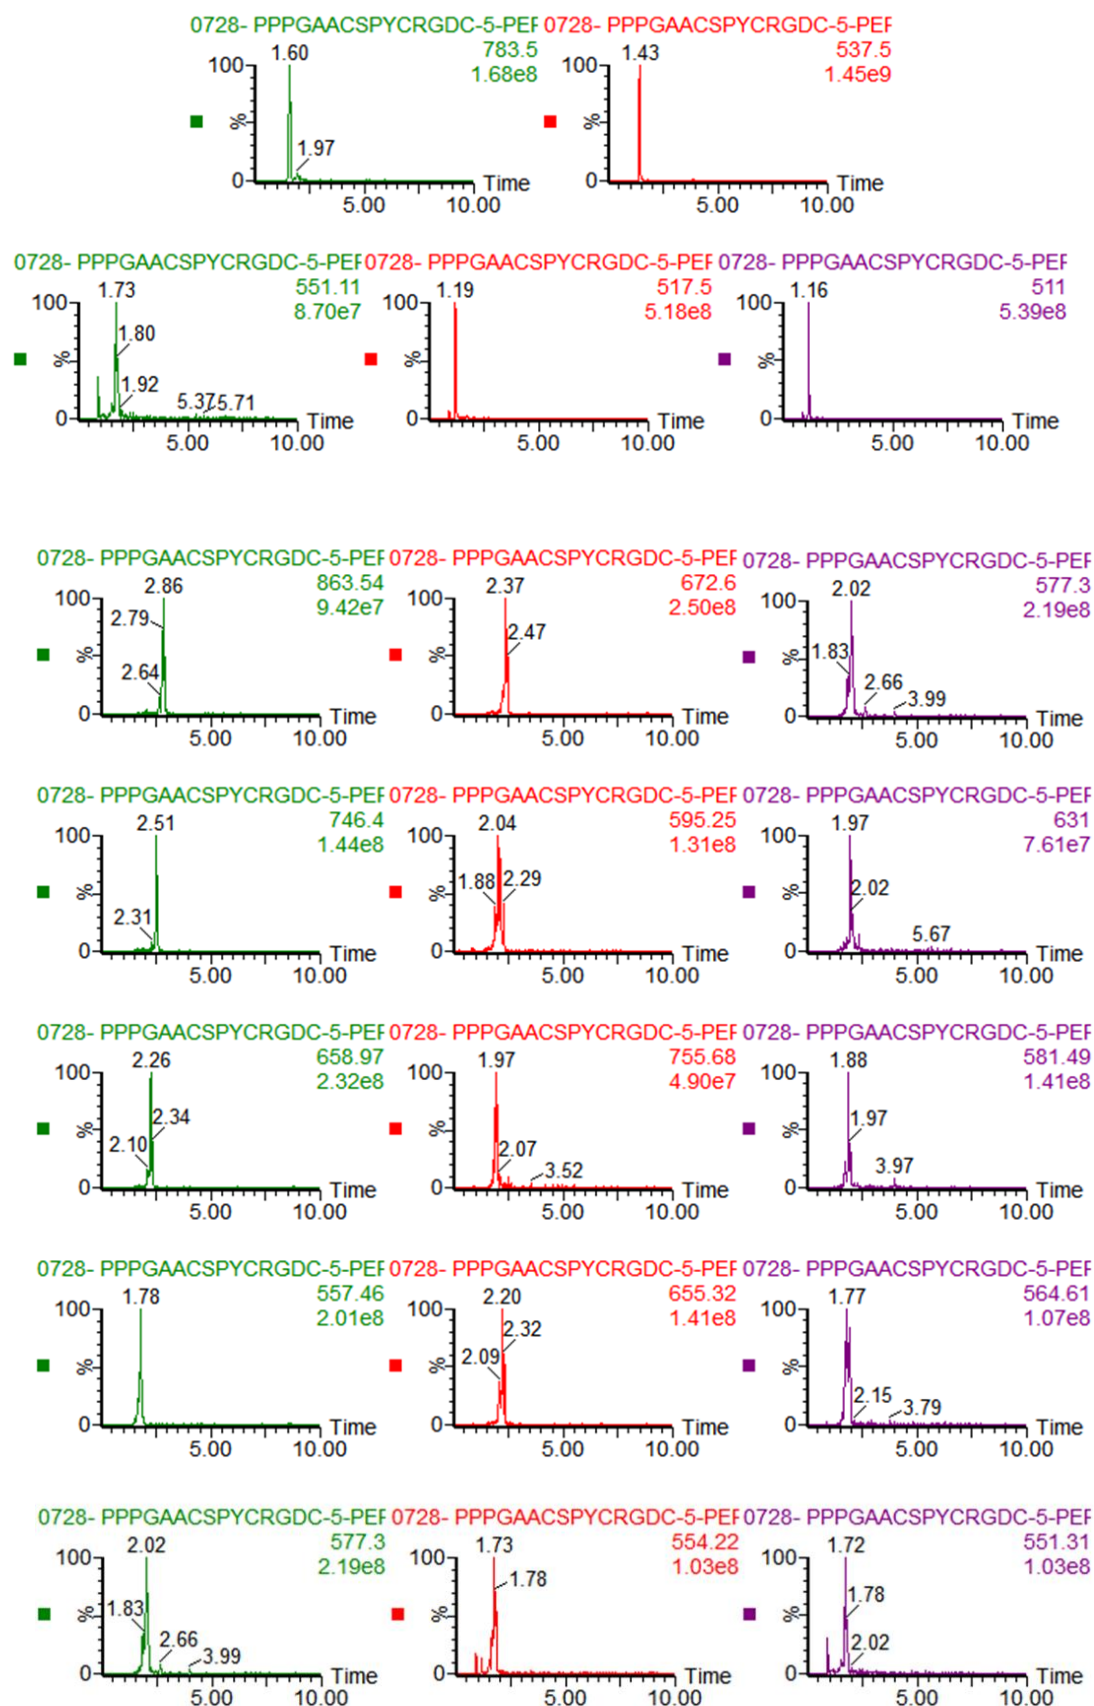

**Fig S243.** LRMS spectrum of intramolecular disulfide-bridged products and cyclodimerization products in **reaction 8**. Extract mass chromatograms from full scan data.

**Tab S24.** The LRMS spectrum analysis of **reaction 8**.

| Sequence        | Products | m/z           |                              |
|-----------------|----------|---------------|------------------------------|
|                 |          | Theoretical   | Measured                     |
|                 | M35-ss   | 783.89 (z=1)  | 783.5 (z=1)                  |
|                 | M1-ss    | 1074.17 (z=1) | 537.5 (z=2)                  |
|                 | M25-ss   | 551.61 (z=1)  | 551.11 (z=2)                 |
|                 | M9-ss    | 1034.10(z=1)  | 517.50 (z=2)                 |
|                 | M6-ss    | 1022.09 (z=1) | 511.05 (z=2)                 |
|                 | B35      | 1724.86 (z=1) | 863.54 (z=2)                 |
|                 | B35-1    | 2015.14 (z=1) | 1008.57 (z=2) ; 672.60 (z=3) |
| L35 (CSPYGRC)   | B1       | 2305.42 (z=1) | 769.72 (z=3) ; 577.30 (z=4)  |
| L1 (CRGDpPRGDC) | B35-25   | 1492.58 (z=1) | 746.44 (z=2)                 |
| L25 (CRGDC)     | B25-1    | 1782.86 (z=1) | 892.09 (z=2) ; 595.25 (z=3)  |
| L9 (CRGDpGRGDC) | B25      | 1260.30 (z=1) | 631.30 (z=2)                 |
| L6 (CRGDAARGDC) | B35-9    | 1975.08 (z=1) | 988.53 (z=2) ; 658.97 (z=3)  |
|                 | B9-1     | 2265.36 (z=1) | 755.68 (z=3) ; 567.24 (z=4)  |
|                 | B25-9    | 1742.79 (z=1) | 871.50 (z=2) ; 581.48 (z=3)  |
|                 | B9       | 2225.29 (z=1) | 742.39 (z=3) ; 557.46 (z=4)  |
|                 | B35-6    | 1963.06 (z=1) | 982.59 (z=2) ; 655.32 (z=3)  |
|                 | B6-1     | 2253.35 (z=1) | 752.38 (z=3) ; 564.61 (z=4)  |
|                 | B25-6    | 1730.78 (z=1) | 865.49 (z=2) ; 577.30 (z=3)  |
|                 | B9-6     | 2213.28 (z=1) | 738.68 (z=3) ; 554.22 (z=4)  |
|                 | B6       | 2201.27 (z=1) | 734.29 (z=3) ; 551.31 (z=4)  |

**Reaction 9**

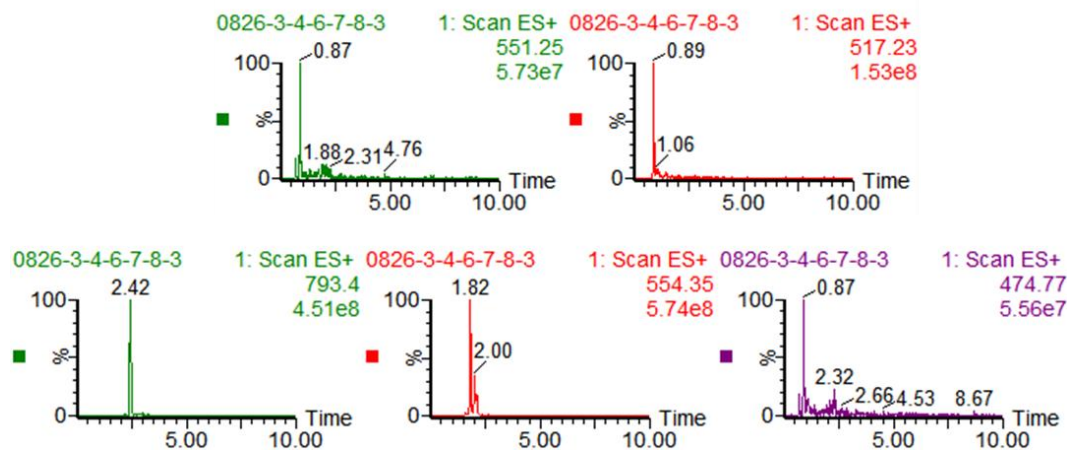

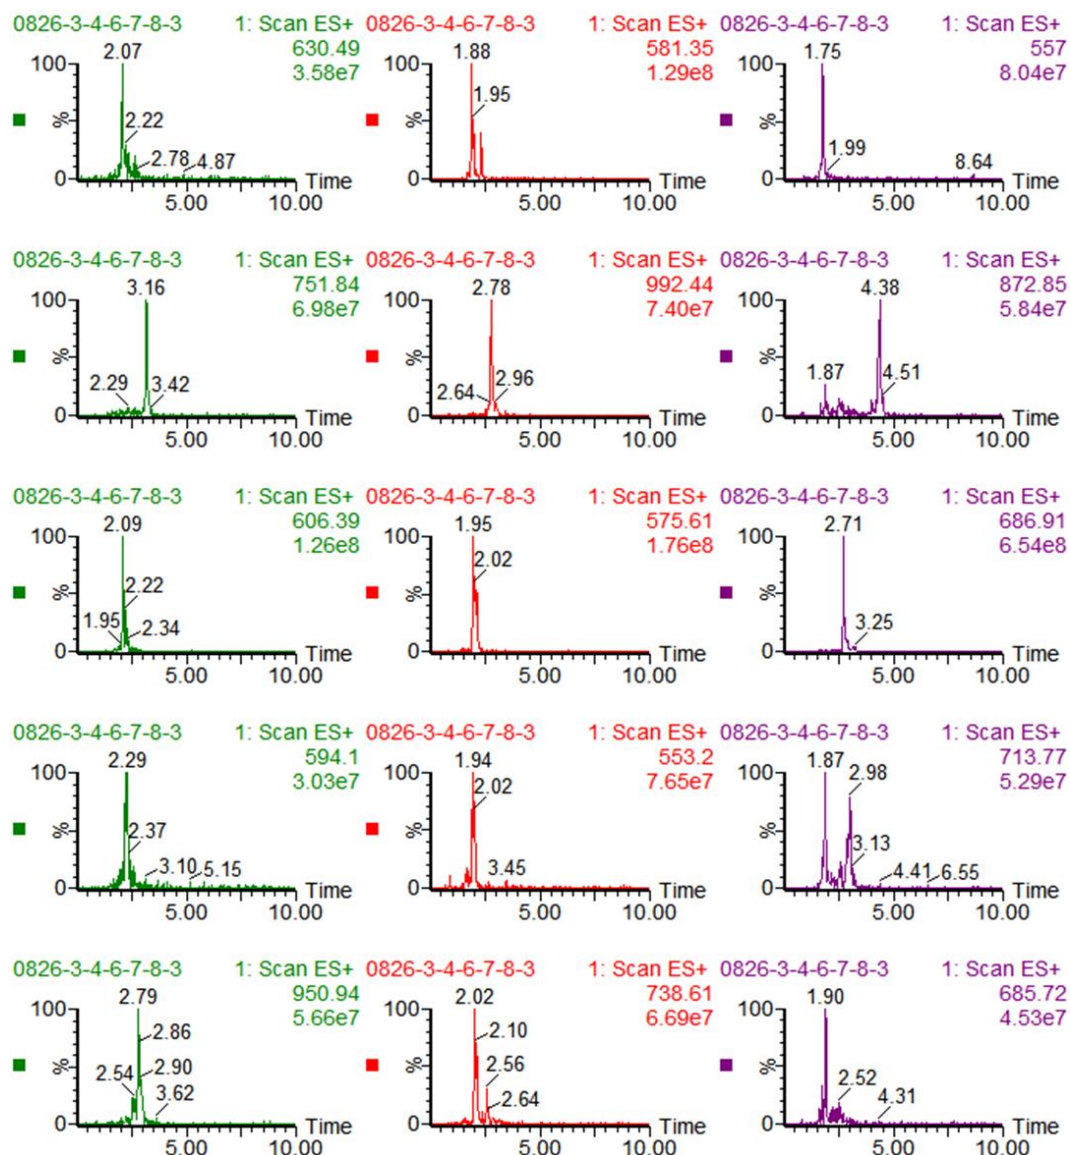

Fig S244. LRMS spectrum of intramolecular disulfide-bridged products and cyclodimerization products in **reaction 9**. Extract mass chromatograms from full scan data.

**Tab S25.** The LRMS spectrum analysis of **reaction 9**.

| Sequence        | Products | m/z                           |                               |
|-----------------|----------|-------------------------------|-------------------------------|
|                 |          | Theoretical                   | Measured                      |
|                 | M25-ss   | 551.61 (z=1)                  | 511.25 (z=1)                  |
|                 | M9-ss    | 1034.10 (z=1)                 | 517.23 (z=2)                  |
|                 | M36-ss   | 793.92 (z=1)                  | 793.40 (z=1)                  |
|                 | M39-ss   | 1108.32 (z=1)                 | 554.35 (z=2)                  |
|                 | M38-ss   | 949.04 (z=1)                  | 474.77 (z=2)                  |
|                 | B25      | 1260.30 (z=1)                 | 630.49 (z=2)                  |
|                 | B25-9    | 1742.79 (z=1)                 | 871.37 (z=2) ; 581.35 (z=3)   |
|                 | B9*      | 2225.29 (z=1)                 | 742.39 (z=3)                  |
| L25 (CRGDC)     | B36-25   | 1502.61 (z=1)                 | 1501.66 (z=1) ; 751.84 (z=2)  |
| L9 (CRGDpGRGDC) | B36-9    | 1985.11 (z=1)                 | 992.44 (z=2)                  |
| L36 (CPPTQFC)   | B36      | 1744.93 (z=1)                 | 1744.84 (z=1) ; 872.85 (z=2)  |
| L39 (CKSAHFKWC) | B39-25   | 1817.01 (z=1)                 | 908.96 (z=2) ; 606.39 (z=3)   |
| L38 (CRGDKGPDC) | B39-9    | 2299.05 (z=1)                 | 766.89 (z=3) ; 575.61 (z=4)   |
|                 | B39-36   | 2059.33 (z=1)                 | 686.91 (z=3) ; 1029.97 (z=2)  |
|                 | B39*     | 2373.73 (z=1)                 | 1187.76 (z=2) ; 594.18 (z=4)  |
|                 | B38-25   | 1657.73 (z=1)                 | 828.91 (z=2) ; 553.20 (z=3) ; |
|                 | B38-9    | 2140.23 (z=1)                 | 713.77 (z=3)                  |
|                 | B38-36   | 1900.05 (z=1)                 | 950.94 (z=2) ; 634.47 (z=3)   |
|                 | B39-38   | 2214.44 (z=1)                 | 738.61 (z=3) ; 554.35 (z=4)   |
|                 | B38      | 2055.16 (z=1) close to B39-36 | 685.72 (z=3) ; 1028.08 (z=2)  |

\*The fragment ion signals of **B9** overlapped with those of the intramolecular disulfide-bridged products of **L39**. The fragment ion signals of **B39** overlapped with those of the intramolecular disulfide-bridged products of **L36**.

## Reaction 10

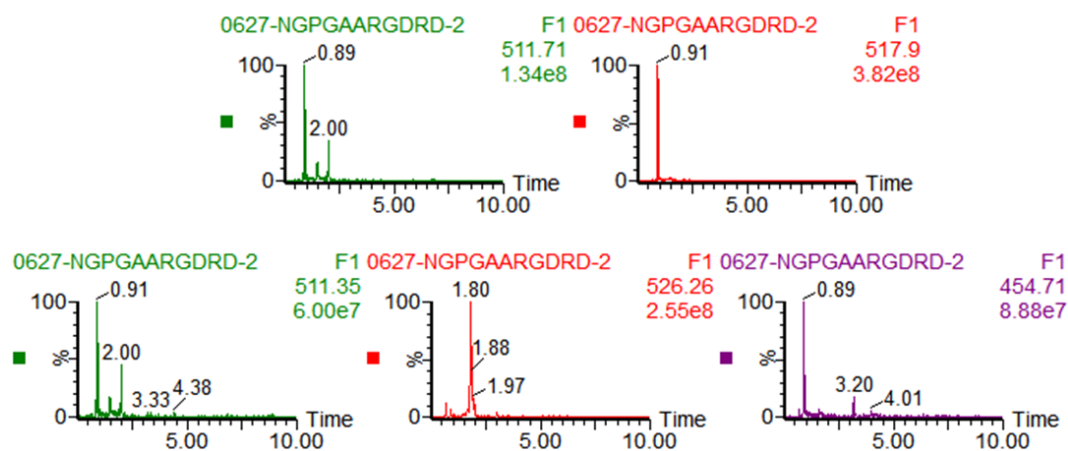

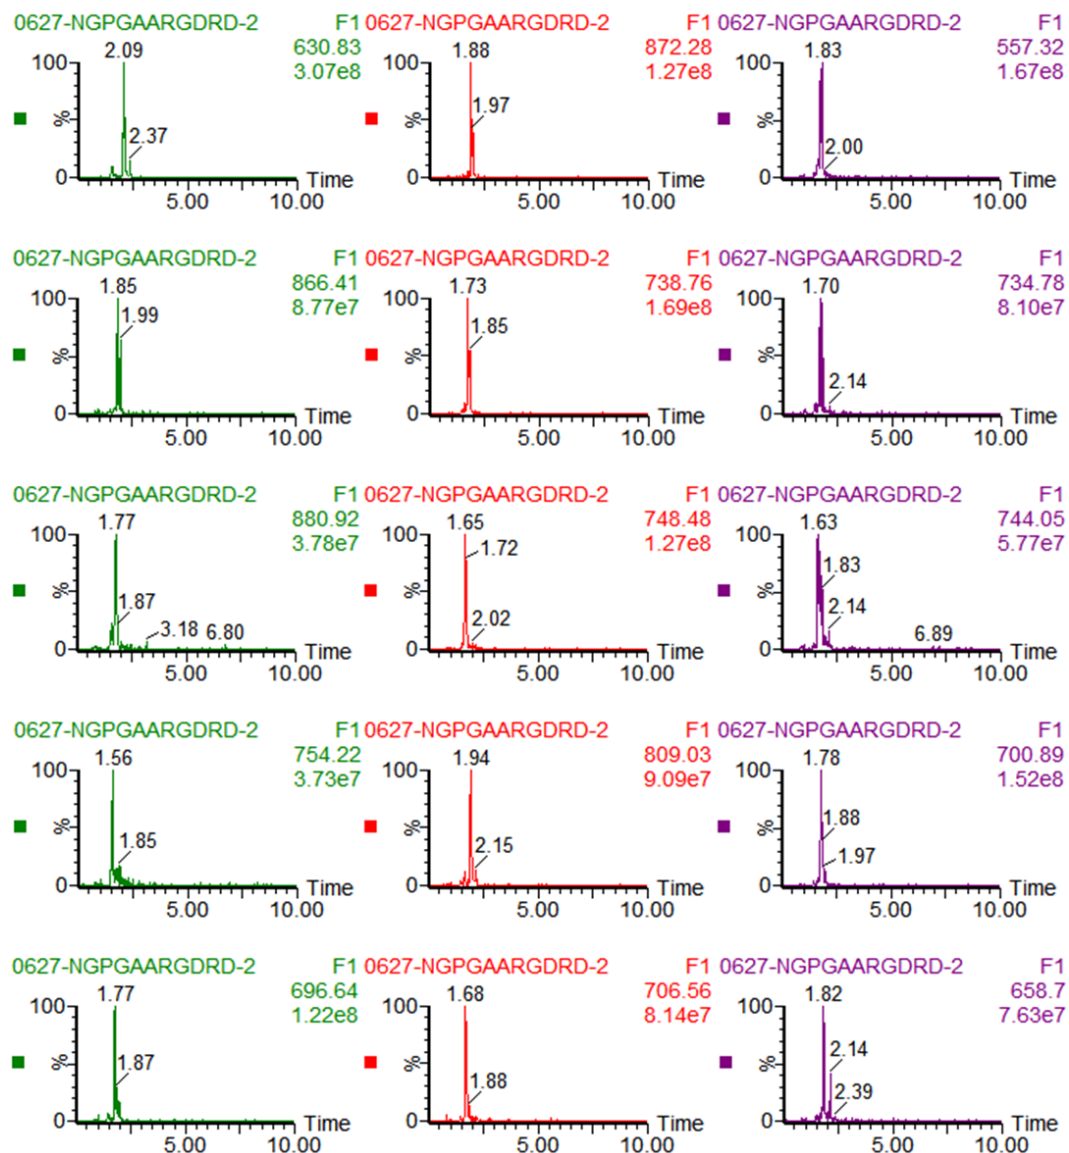

**Fig S245.** LRMS spectrum of intramolecular disulfide-bridged products and cyclodimerization products in **reaction 10**. Extract mass chromatograms from full scan data.

Tab S26. The LRMS spectrum analysis of reaction 10.

| Sequence        | Products | m/z           |                             |
|-----------------|----------|---------------|-----------------------------|
|                 |          | Theoretical   | Measured                    |
|                 | M25-ss   | 551.61 (z=1)  | 551.71 (z=1)                |
|                 | M9-ss    | 1034.10 (z=1) | 517.90 (z=2)                |
|                 | M6-ss    | 1022.09 (z=1) | 511.35 (z=2)                |
|                 | M8-ss    | 1051.90 (z=1) | 526.26 (z=2)                |
|                 | M24-ss   | 907.99 (z=1)  | 454.71 (z=2)                |
|                 | B25      | 1260.30 (z=1) | 630.83 (z=2)                |
|                 | B25-9    | 1742.94 (z=1) | 872.28 (z=2)                |
|                 | B9       | 2225.29 (z=1) | 743.22 (z=3) ; 557.32 (z=4) |
| L25 (CRGDC)     | B25-6    | 1730.78 (z=1) | 866.41 (z=2)                |
| L9 (CRGDpGRGDC) | B9-6     | 2213.28 (z=1) | 738.76 (z=3) ; 554.48 (z=4) |
| L6 (CRGDAARGDC) | B6       | 2201.27 (z=1) | 734.78 (z=3) ; 551.65 (z=4) |
| L8 (CRGDNGRGDC) | B25-8    | 1759.78 (z=1) | 880.92 (z=2)                |
| L24 (CRDAARDC)  | B9-8     | 2242.28 (z=1) | 748.48 (z=3) ; 561.91 (z=4) |
|                 | B8-6     | 2230.27 (z=1) | 744.05 (z=3) ; 558.87 (z=4) |
|                 | B8       | 2259.27 (z=1) | 754.22 (z=3) ; 566.63 (z=4) |
|                 | B25-24   | 1616.68 (z=1) | 809.03 (z=2)                |
|                 | B24-9    | 2099.18 (z=1) | 700.89 (z=3) ; 526.06 (z=4) |
|                 | B24-6    | 2087.17 (z=1) | 696.64 (z=3) ; 523.03 (z=4) |
|                 | B24-8    | 2116.16 (z=1) | 706.56 (z=3) ; 530.18 (z=4) |
|                 | B24      | 1973.06 (z=1) | 987.17 (z=2) ; 658.70 (z=3) |

10 different peptides reaction

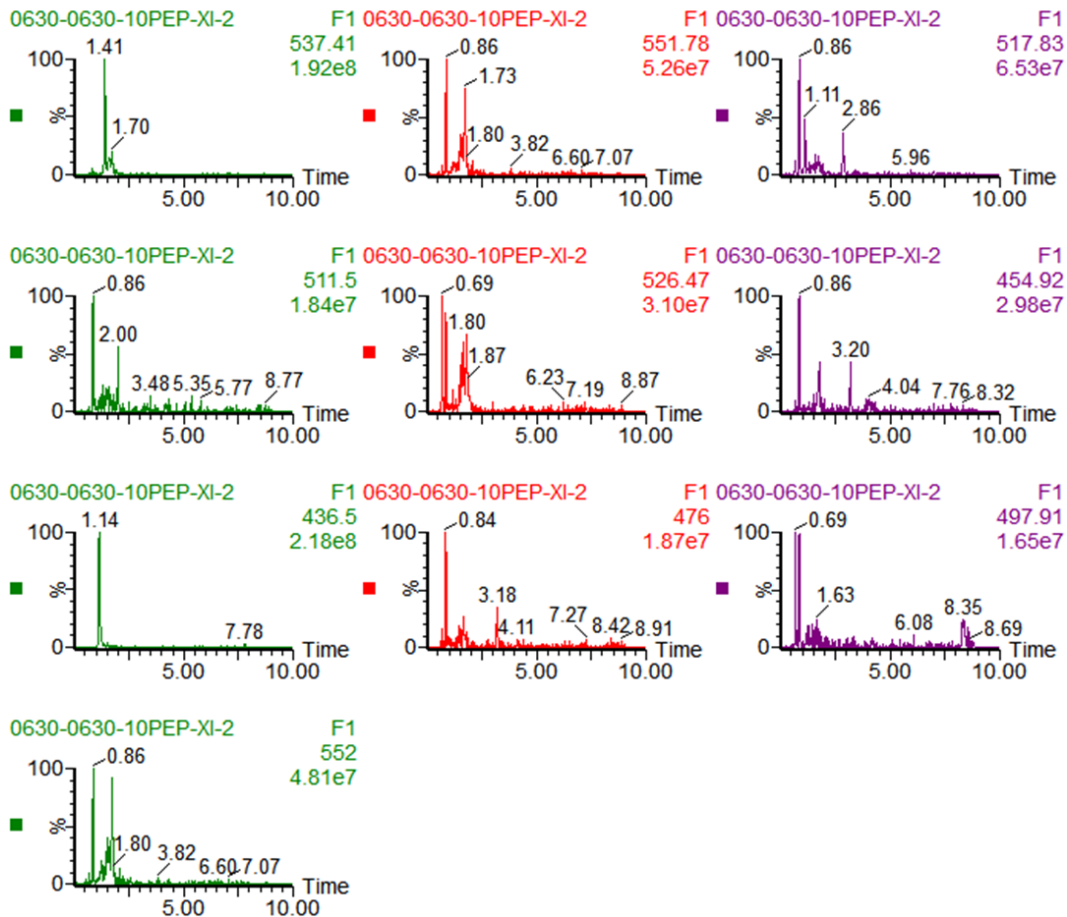

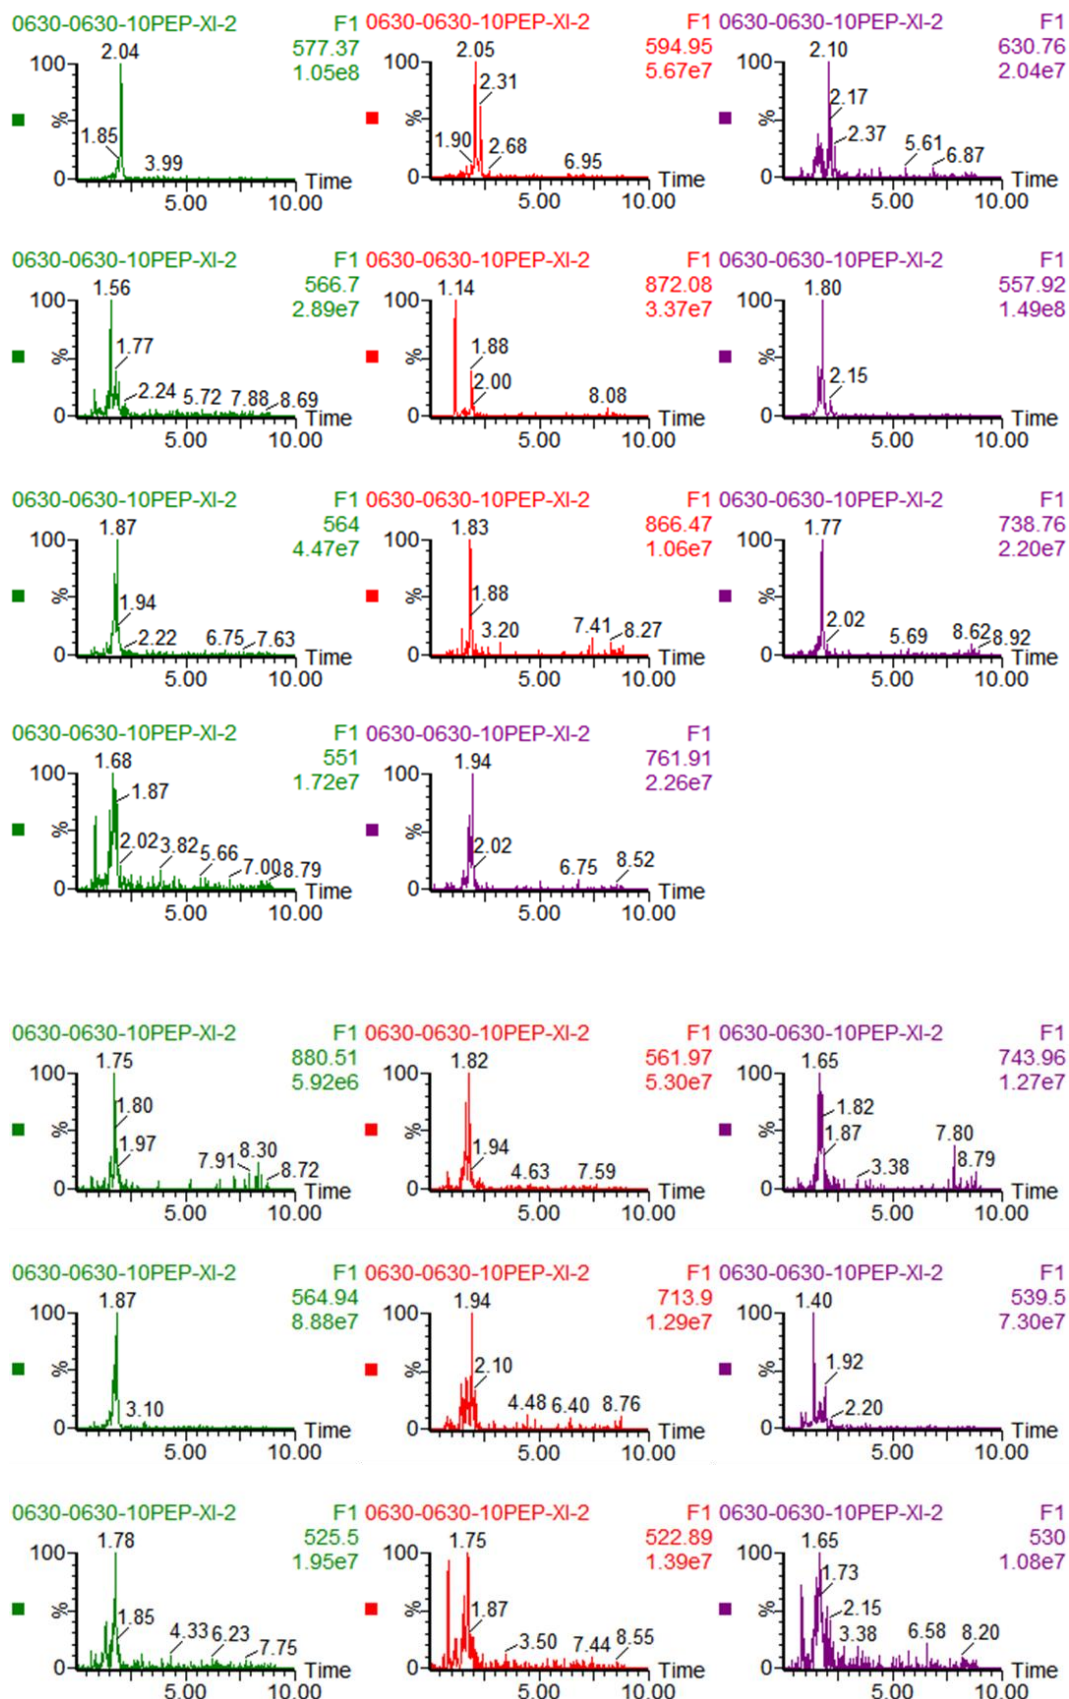

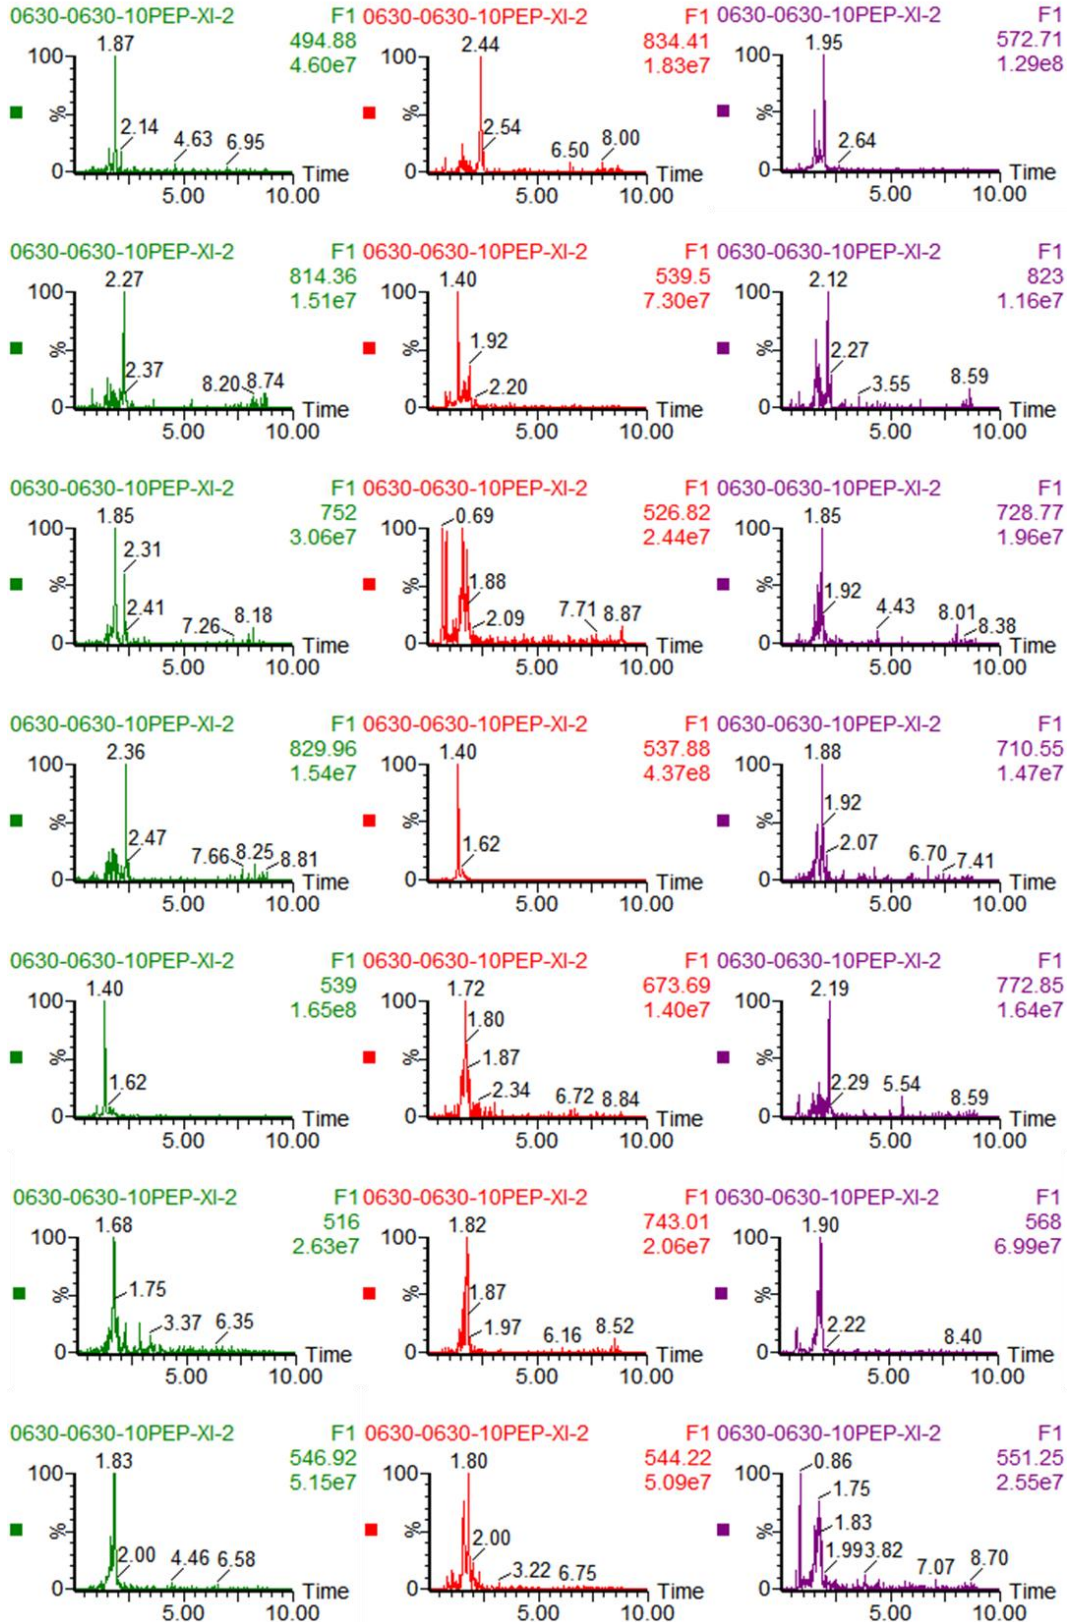

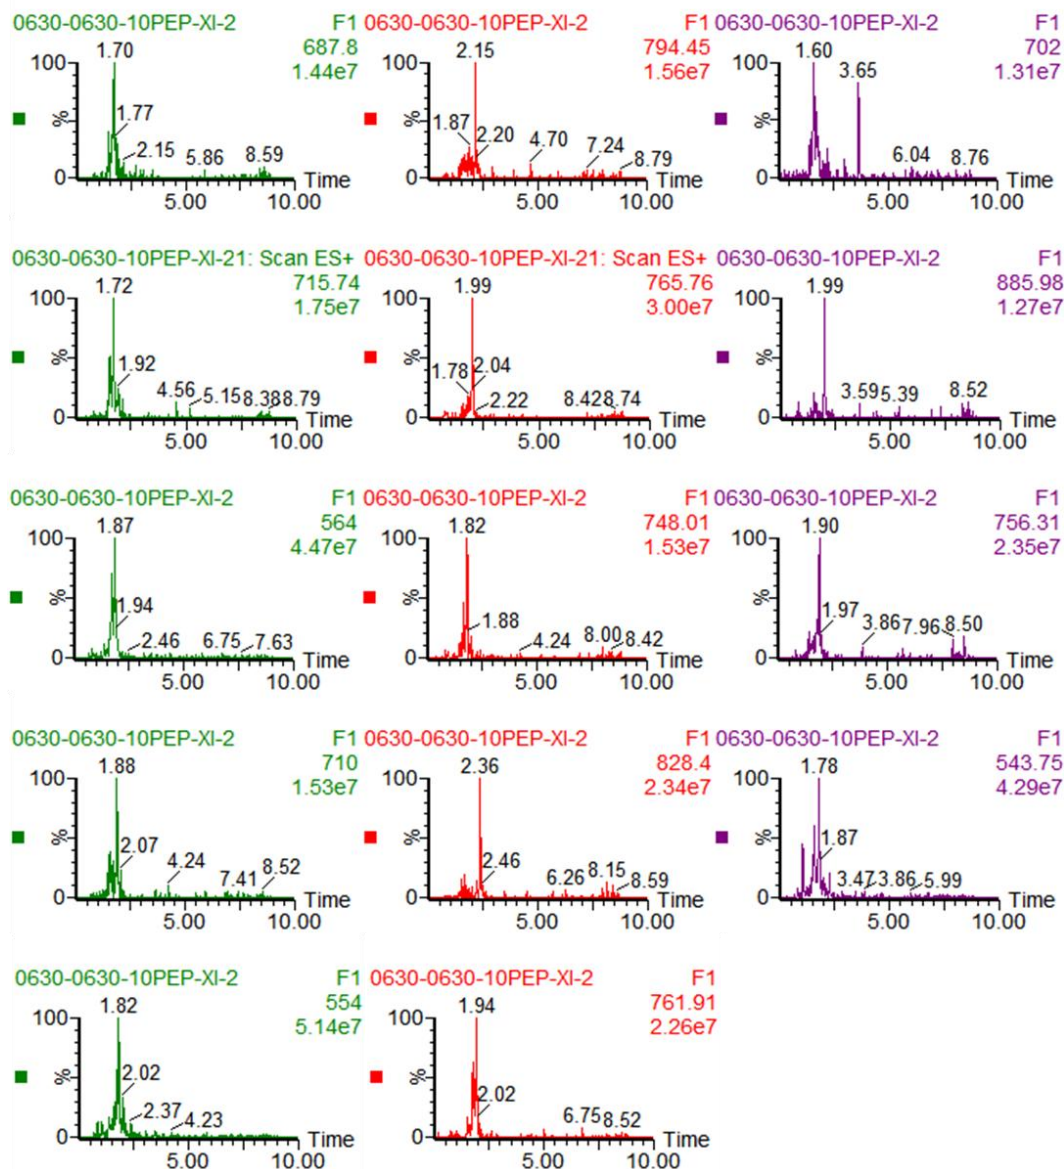

**Fig S246.** LRMS spectrum of intramolecular disulfide-bridged products and cyclodimerization products in reaction with 10 different peptides. Extract mass chromatograms from full scan data.

**Tab S27.** The LRMS spectrum analysis of 3,6-DCT-mediated cyclodimerization reactions with 10 different peptides.

| Sequence           | Products | m/z           |                             |
|--------------------|----------|---------------|-----------------------------|
|                    |          | Theoretical   | Measured                    |
|                    | M1-ss    | 1074.17 (z=1) | 537.41 (z=2)                |
|                    | M25-ss   | 551.61 (z=1)  | 551.78 (z=1)                |
|                    | M9-ss    | 1034.10 (z=1) | 517.83 (z=2)                |
|                    | M6-ss    | 1022.09 (z=1) | 511.5 (z=2)                 |
|                    | M8-ss    | 1051.90 (z=1) | 526.47 (z=2)                |
|                    | M24-ss   | 907.99 (z=1)  | 454.92 (z=2)                |
|                    | M27-ss   | 436.51 (z=1)  | 436.5 (z=1)                 |
|                    | M45-ss   | 951.01 (z=1)  | 476.00 (z=2)                |
|                    | M7-ss    | 994.04 (z=1)  | 497.91 (z=2)                |
|                    | M10-ss   | 1062.16 (z=1) | 552.00 (z=2)                |
|                    | B1       | 2305.42 (z=1) | 769.47 (z=3) ; 577.37 (z=4) |
|                    | B25-1    | 1782.86 (z=1) | 891.85 (z=2) ; 594.95 (z=3) |
|                    | B25      | 1260.30 (z=1) | 630.76 (z=2)                |
|                    | B9-1     | 2265.36 (z=1) | 755.70 (z=3) ; 566.70 (z=4) |
|                    | B25-9    | 1742.79 (z=1) | 872.08 (z=2)                |
|                    | B9       | 2225.25 (z=1) | 743.01 (z=3) ; 557.92 (z=4) |
|                    | B6-1     | 2253.35 (z=1) | 751.86 (z=3) ; 564.00 (z=4) |
|                    | B25-6    | 1544.61 (z=1) | 866.47 (z=2)                |
|                    | B9-6     | 2213.28 (z=1) | 738.76 (z=3)                |
|                    | B6       | 2201.27 (z=1) | 734.85 (z=3)                |
|                    | B8-1     | 2282.34 (z=1) | 761.91 (z=3)                |
|                    | B25-8    | 1759.78 (z=1) | 880.51 (z=2)                |
|                    | B9-8     | 2242.28 (z=1) | 748.95 (z=3) ; 561.97 (z=4) |
|                    | B8-6     | 2230.27 (z=1) | 743.96 (z=3)                |
|                    | B8       | 2259.27 (z=1) | 752.33 (z=3) ; 564.94 (z=4) |
|                    | B24-1    | 2139.24 (z=1) | 713.92 (z=3)                |
| L1 (CRGDpPRGDC)    | B25-24   | 1616.68 (z=1) | 809.44 (z=2) ; 539.5 (z=3)  |
| L25 (CRGDC)        | B24-9    | 2099.18 (z=1) | 525.5 (z=4)                 |
| L9 (CRGDpGRGDC)    | B24-6    | 2087.17 (z=1) | 696.50 (z=3) ; 522.89 (z=4) |
| L6 (CRGDAARGDC)    | B24-8    | 2116.16 (z=1) | 706.63 (z=3) ; 530.05 (z=4) |
| L8 (CRGDNGRGDC)    | B24      | 1973.06 (z=1) | 494.88 (z=4)                |
| L24 (CRDAARDC)     | B27-1    | 1667.77 (z=1) | 834.41 (z=2)                |
| L27 (CAAAC)        | B27-25   | 1145.20 (z=1) | 572.71 (z=2)                |
| L45 (CRGDARGDC)    | B27-9    | 1627.70 (z=1) | 814.36 (z=2)                |
| L7 (CRGDGGRGDC)    | B27-6    | 1615.69 (z=1) | 809.44 (z=2)                |
| L10 (CRGDAibpRGDC) | B27-8    | 1644.69 (z=1) | 822.94 (z=2)                |
|                    | B27-24   | 1501.59 (z=1) | 751.92 (z=2)                |
|                    | B27      | 1030.11 (z=1) | 526.82 (z=2)                |
|                    | B45-1    | 2182.27 (z=1) | 728.77 (z=3)                |
|                    | B45-25   | 1659.70 (z=1) | 829.96 (z=2)                |
|                    | B45-9    | 2142.20 (z=1) | 715.74 (z=3) ; 537.88 (z=4) |
|                    | B45-6    | 2130.19 (z=1) | 710.55 (z=3)                |
|                    | B45-8    | 2159.19 (z=1) | 719.66 (z=3)                |
|                    | B45-24   | 2016.09 (z=1) | 673.69 (z=3) ; 504.94 (z=4) |
|                    | B45-27   | 1544.61 (z=1) | 772.85 (z=2)                |
|                    | B45      | 2059.11 (z=1) | 687.46 (z=3) ; 516.01 (z=3) |
|                    | B7-1     | 2225.29 (z=1) | 743.01 (z=3)                |
|                    | B25-7    | 1702.73 (z=1) | 851.96 (z=2)                |
|                    | B9-7     | 2185.23 (z=1) | 729.31 (z=3)                |
|                    | B7-6     | 2173.22 (z=1) | 725.06 (z=3)                |
|                    | B8-7     | 2202.21 (z=1) | 735.39 (z=3)                |
|                    | B24-7    | 2059.11 (z=1) | 687.80 (z=3)                |
|                    | B27-7    | 1587.64 (z=1) | 794.45 (z=2)                |
|                    | B45-7    | 2102.14 (z=1) | 702.11 (z=3)                |
|                    | B7       | 2145.16 (z=1) | 715.74 (z=3)                |
|                    | B10-1    | 2293.41 (z=1) | 765.76 (z=3)                |
|                    | B25-10   | 1770.85 (z=1) | 885.98 (z=2)                |
|                    | B10-9    | 2253.35 (z=1) | 751.86 (z=3)                |
|                    | B10-6    | 2241.34 (z=1) | 748.01 (z=3)                |
|                    | B10-8    | 2270.33 (z=1) | 756.31 (z=3)                |
|                    | B24-10   | 2127.23 (z=1) | 709.87 (z=3)                |
|                    | B27-10   | 1655.76 (z=1) | 828.40 (z=2)                |
|                    | B45-10   | 2170.26 (z=1) | 695.08 (z=3)                |
|                    | B10-7    | 2213.28 (z=1) | 738.06 (z=3)                |
|                    | B10      | 2281.40 (z=1) | 761.91 (z=3)                |

## 10. NMR spectrum

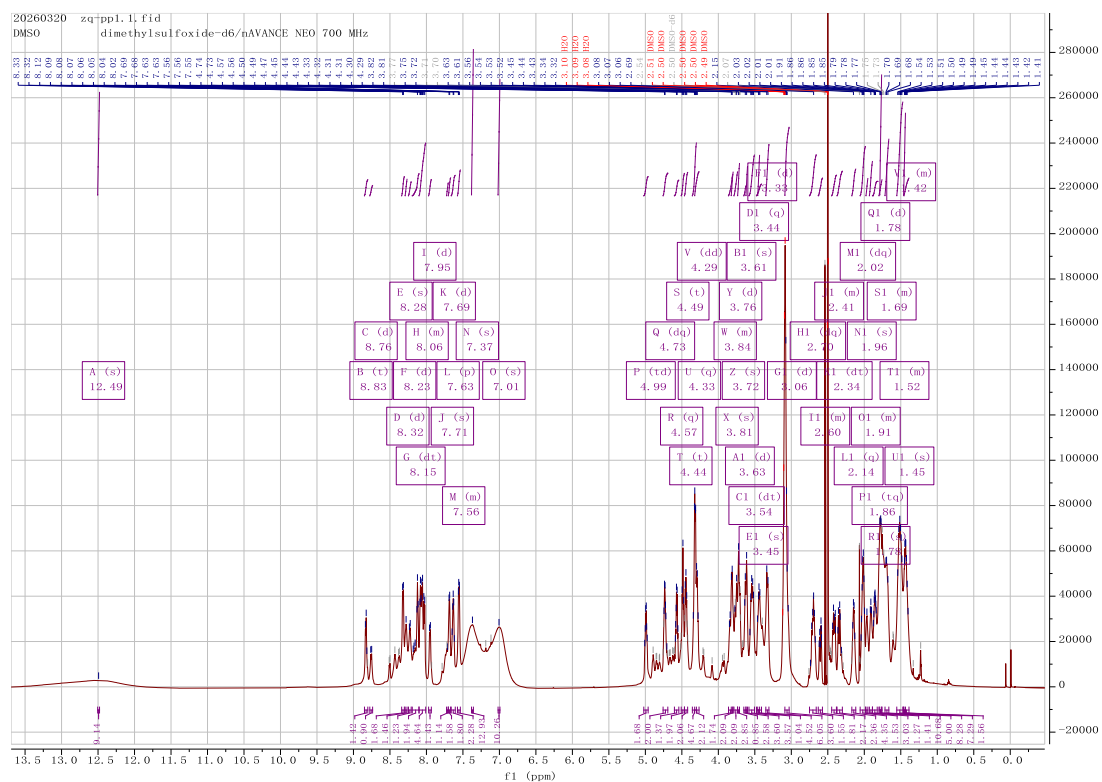

Fig S247.  $^1\text{H}$  NMR spectrum of **B1a**.

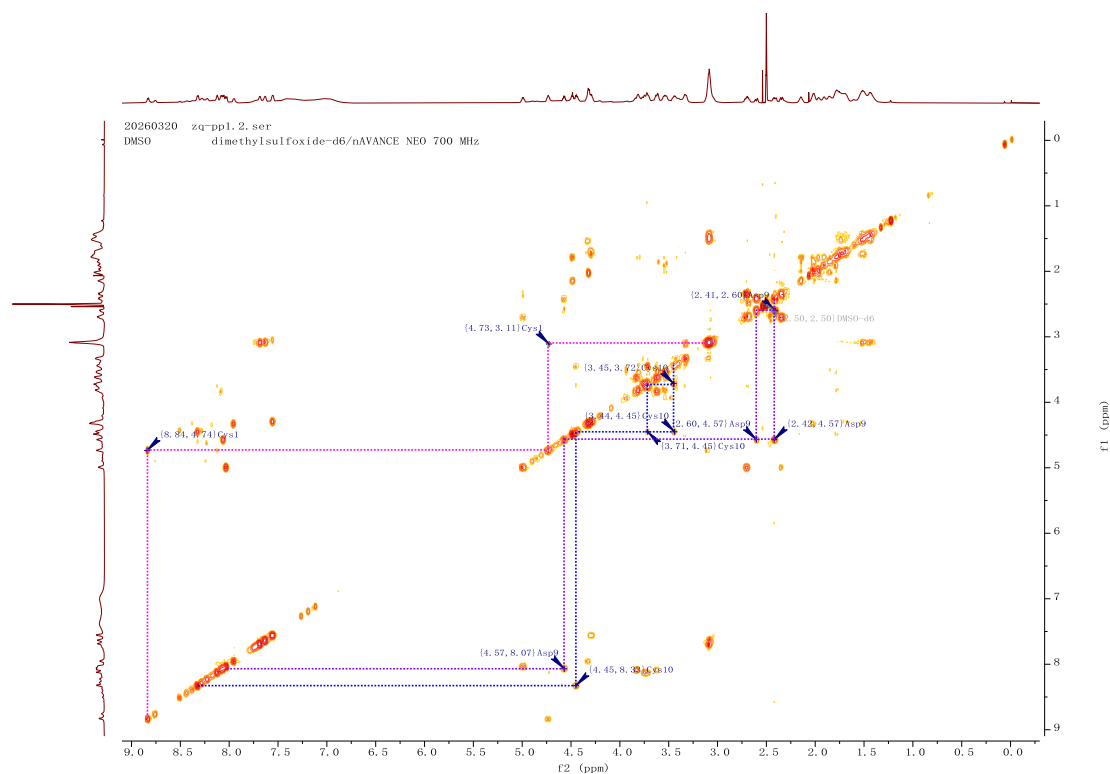

Fig S248.  $^1\text{H}$ - $^1\text{H}$  COSY spectrum of **B1a**. Dashed lines trace the spin systems of Cys1 (pink), Asp9 (purple), and Cys10 (blue). Annotated values represent chemical shifts (ppm).

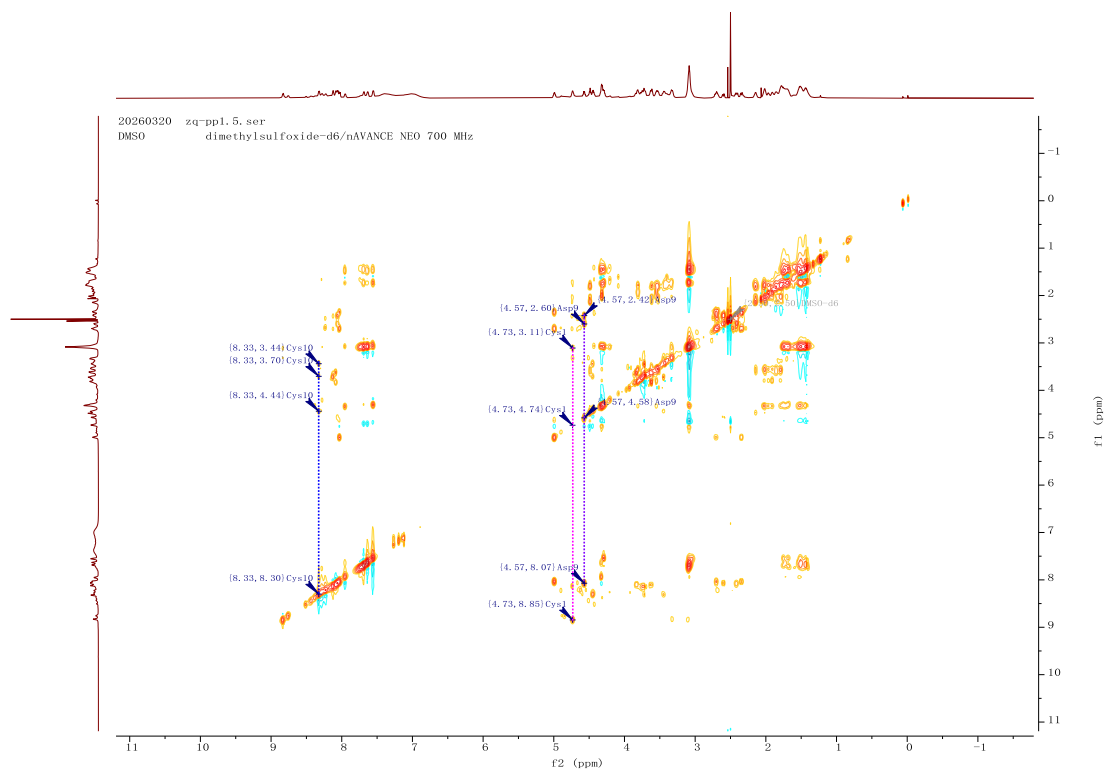

**Fig S249.** TOCSY spectrum of **B1a**. Dashed lines trace the spin systems of Cys1 (pink), Asp9 (purple), and Cys10 (blue). Annotated values represent chemical shifts (ppm).

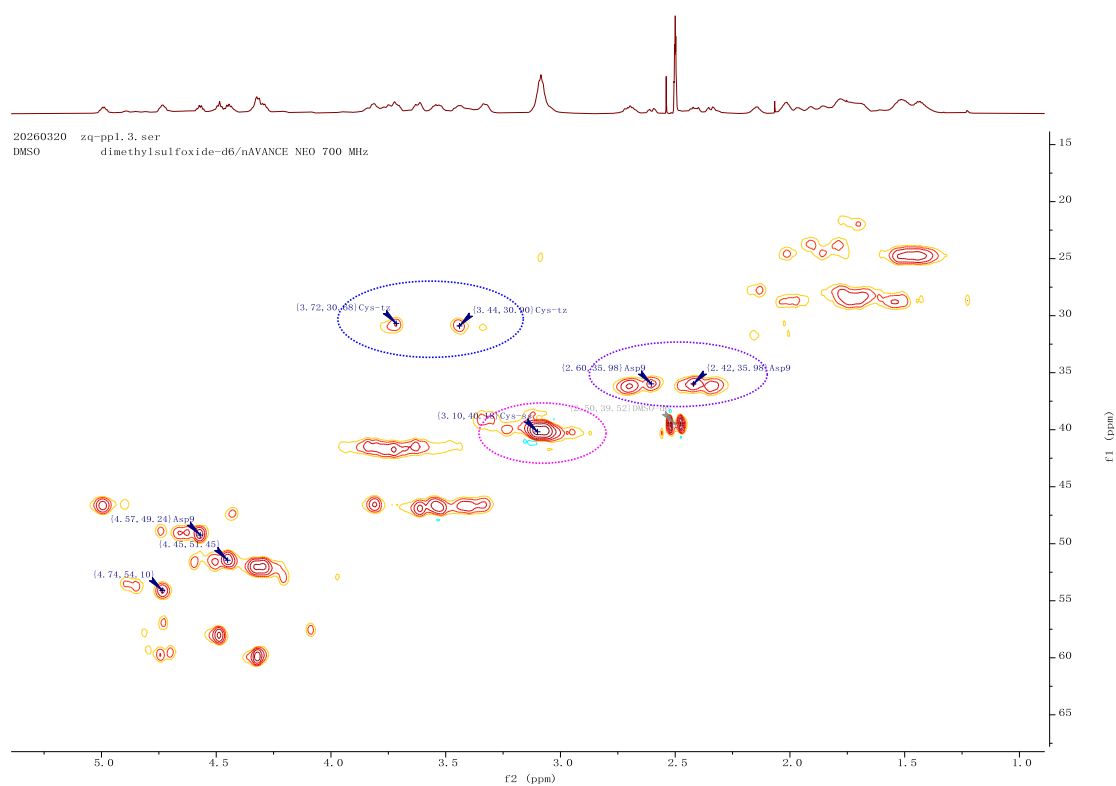

**Fig S250.** HSQC spectrum of **B1a**. Colored dashed ovals highlight specific cross-peaks: blue for Cys10, purple for Asp9, and pink for Cys1. Annotated values represent chemical shifts in ppm.

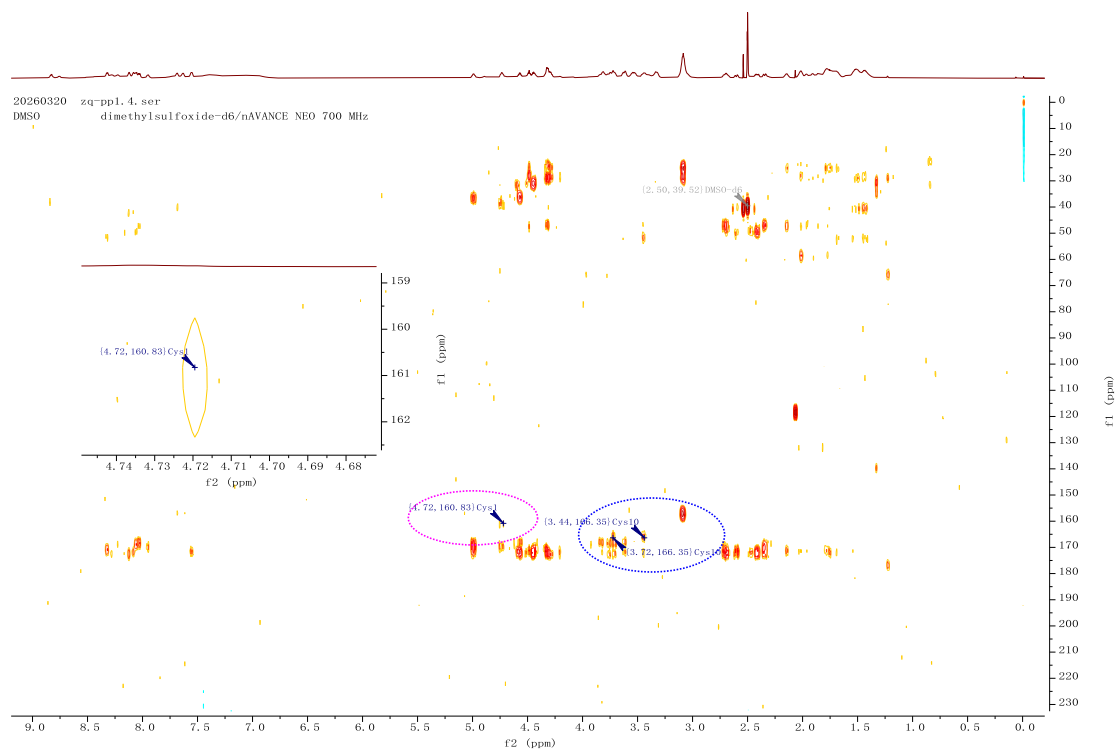

**Fig S251.** HMBC spectrum of **B1a**. Colored dashed ovals highlight specific cross-peaks: blue for Cys10, and pink for Cys1. Annotated values represent chemical shifts in ppm.

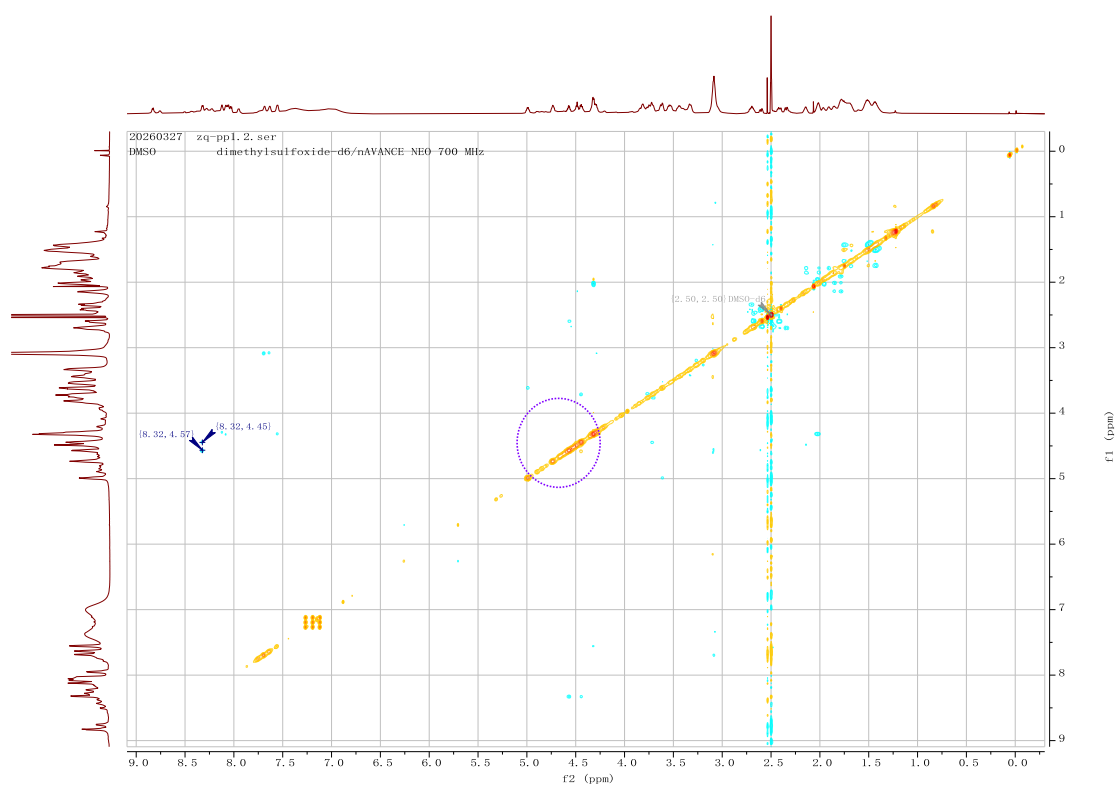

**Fig S252.** ROESY spectrum of **B1a**. The purple dashed circle highlights the absence of an observable NOE correlation between Cys1 and Asp9. Annotated values represent chemical shifts in ppm.

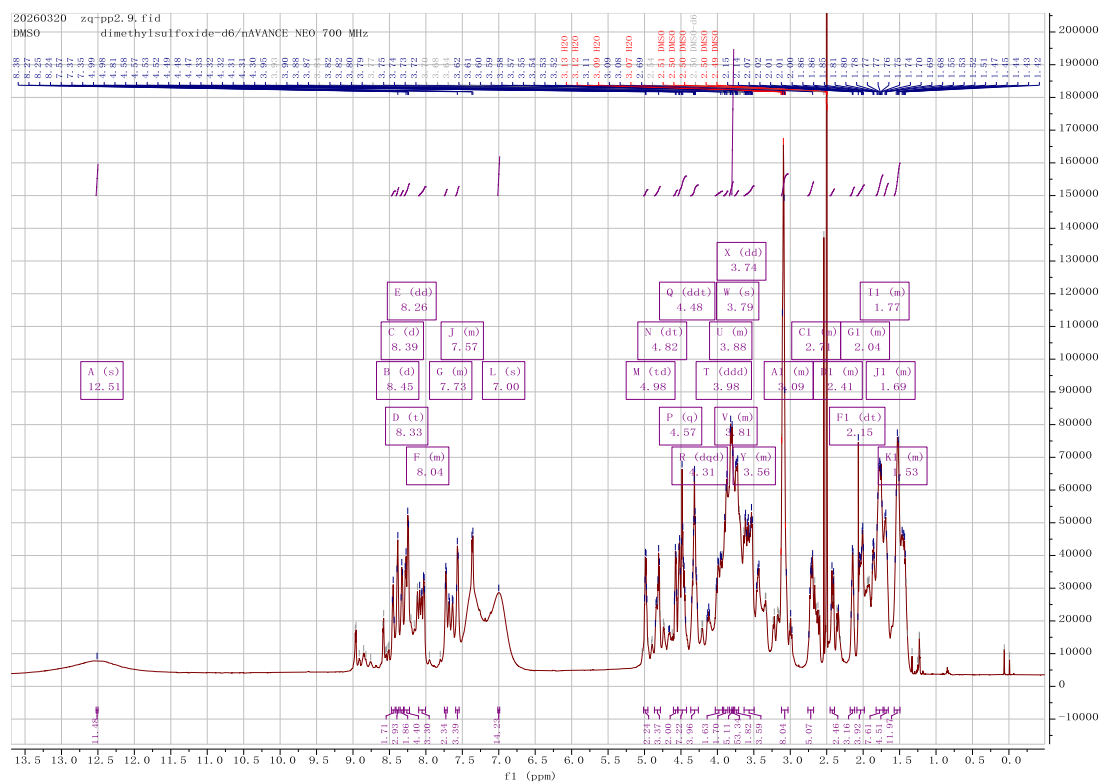

Fig S253.  $^1\text{H}$  spectrum of **B1b**.

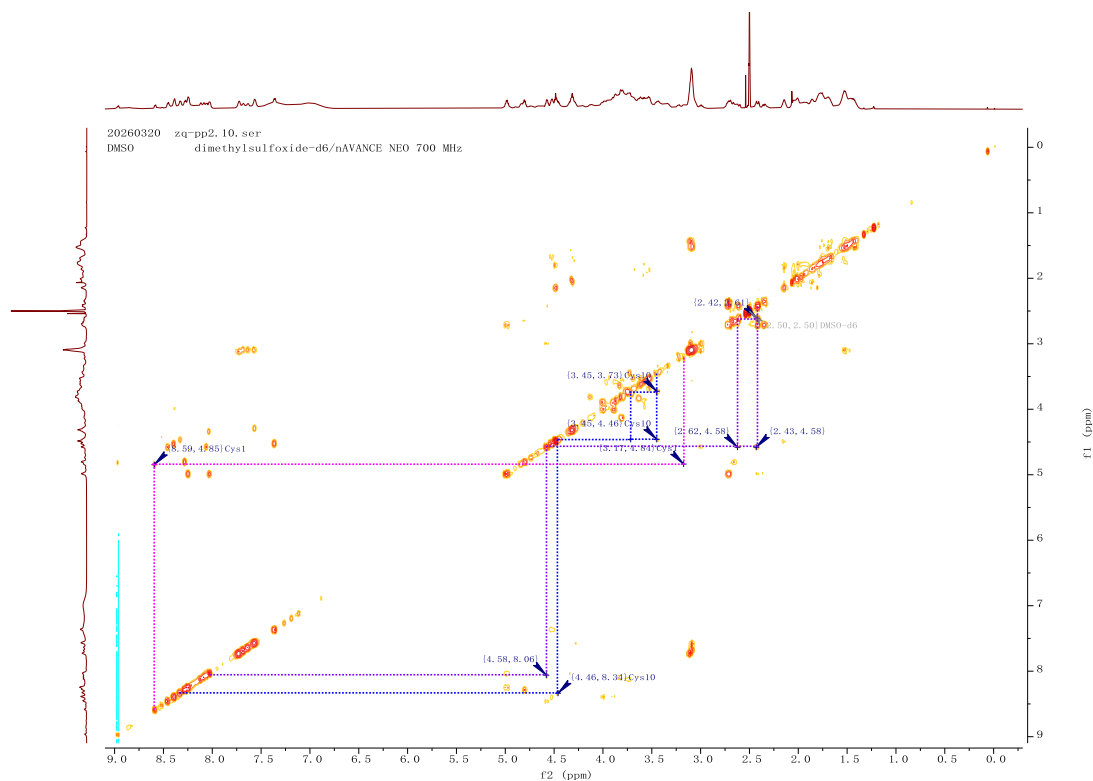

Fig S254.  $^1\text{H}$ - $^1\text{H}$  COSY spectrum of **B1b**. Dashed lines trace the spin systems of Cys1 (pink), Asp9 (purple), and Cys10 (blue). Annotated values represent chemical shifts (ppm).

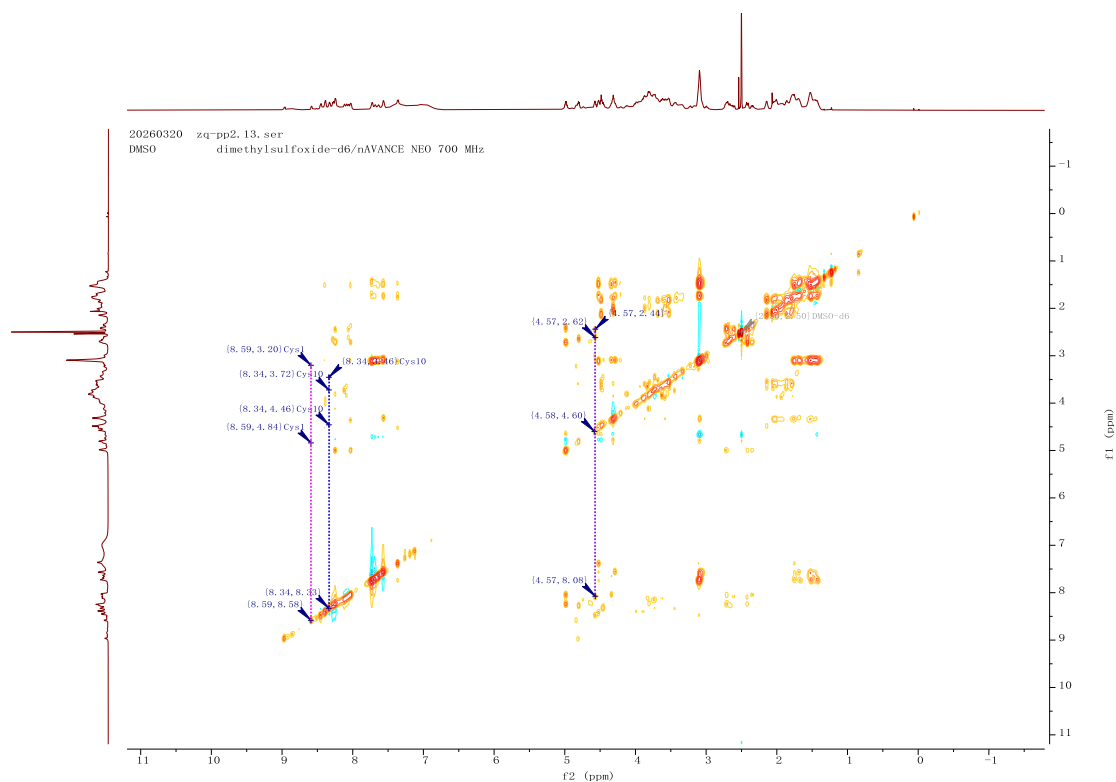

**Fig S255.** TOCSY spectrum of **B1b**. Dashed lines trace the spin systems of Cys1 (pink), Asp9 (purple), and Cys10 (blue). Annotated values represent chemical shifts (ppm).

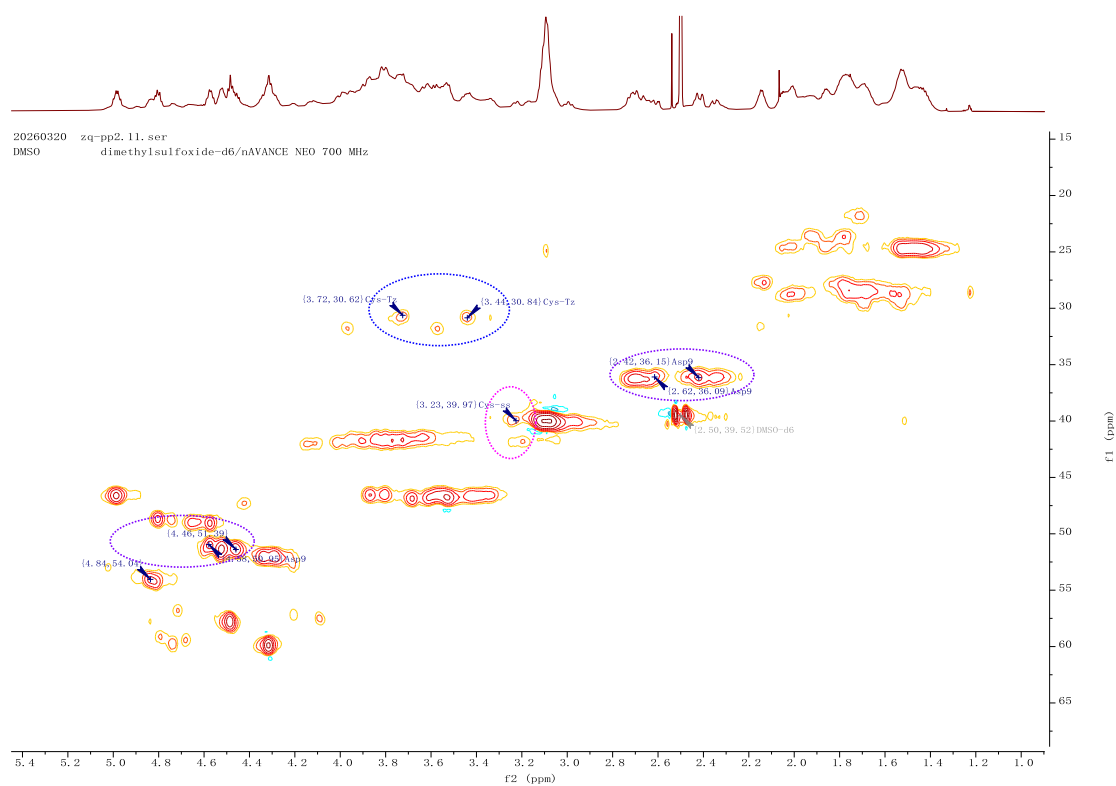

**Fig S256.** HSQC spectrum of **B1b**. Colored dashed ovals highlight specific cross-peaks: blue for Cys10, purple for Asp9, and pink for Cys1. Annotated values represent chemical shifts in ppm.

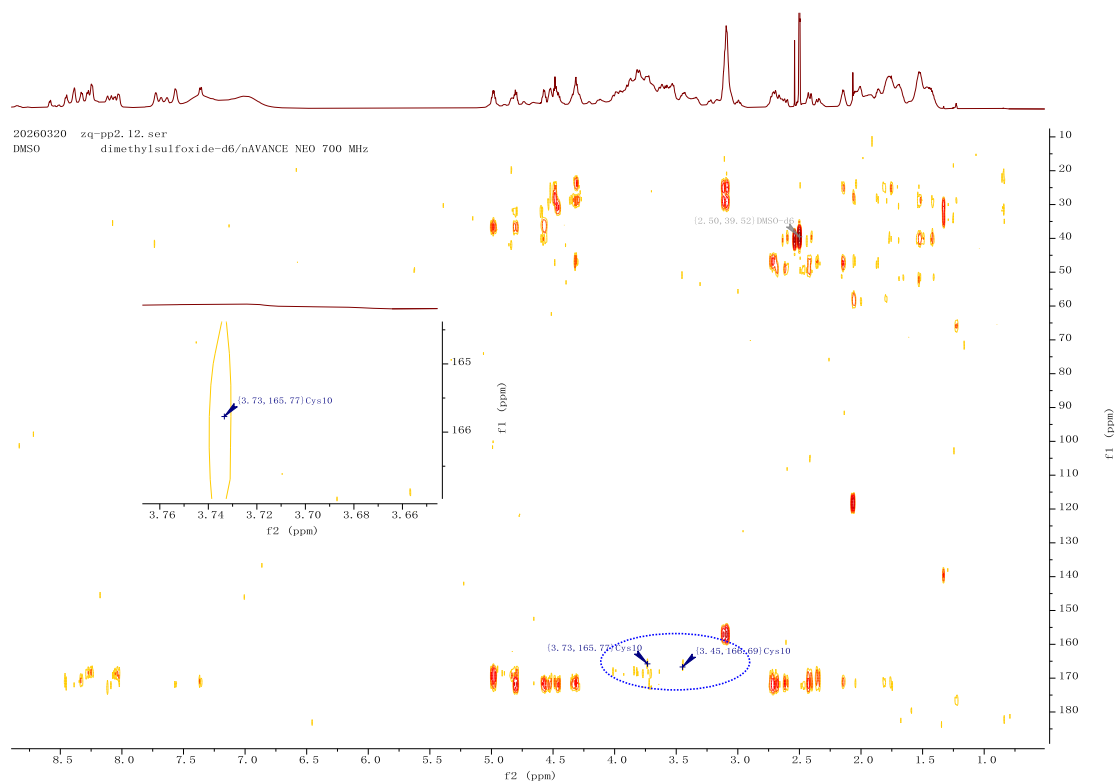

**Fig S257.** HMBC spectrum of **B1b**. Colored dashed ovals highlight specific cross-peaks: blue for Cys10. Annotated values represent chemical shifts in ppm.

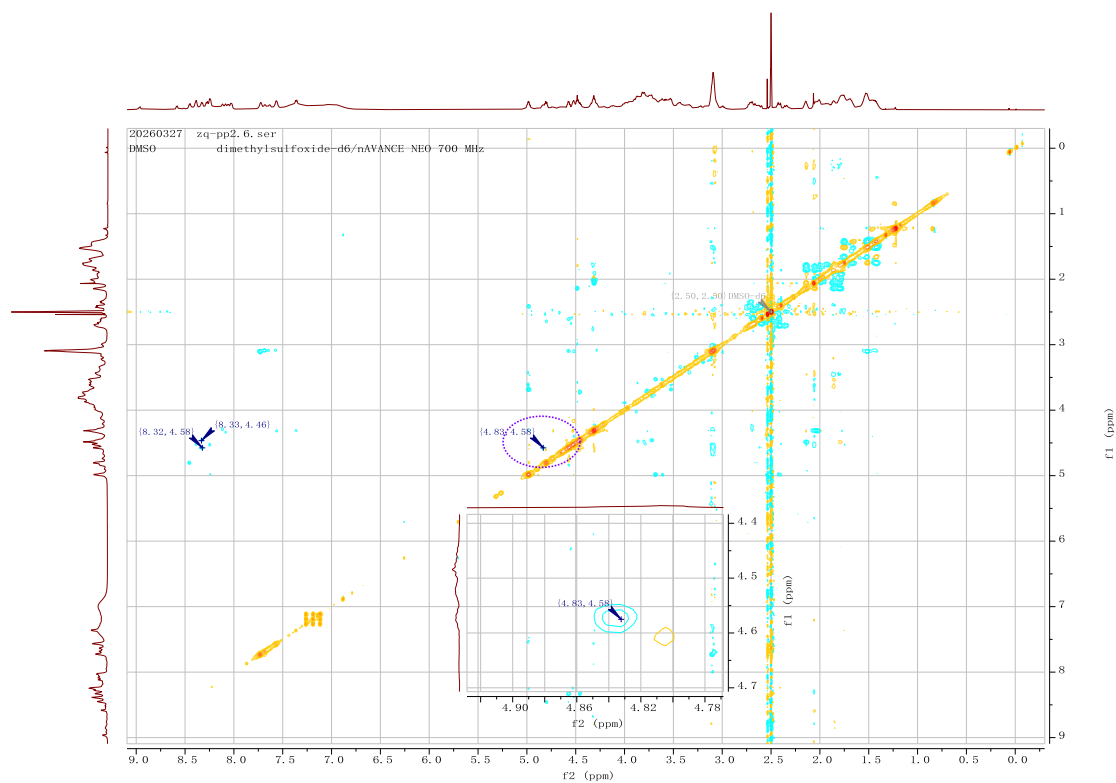

**Fig S258.** ROESY spectrum of **B1b**. The purple dashed oval and the corresponding magnified inset highlight the spatial NOE correlation between Cys1 and Asp9. Annotated values represent chemical shifts in ppm.

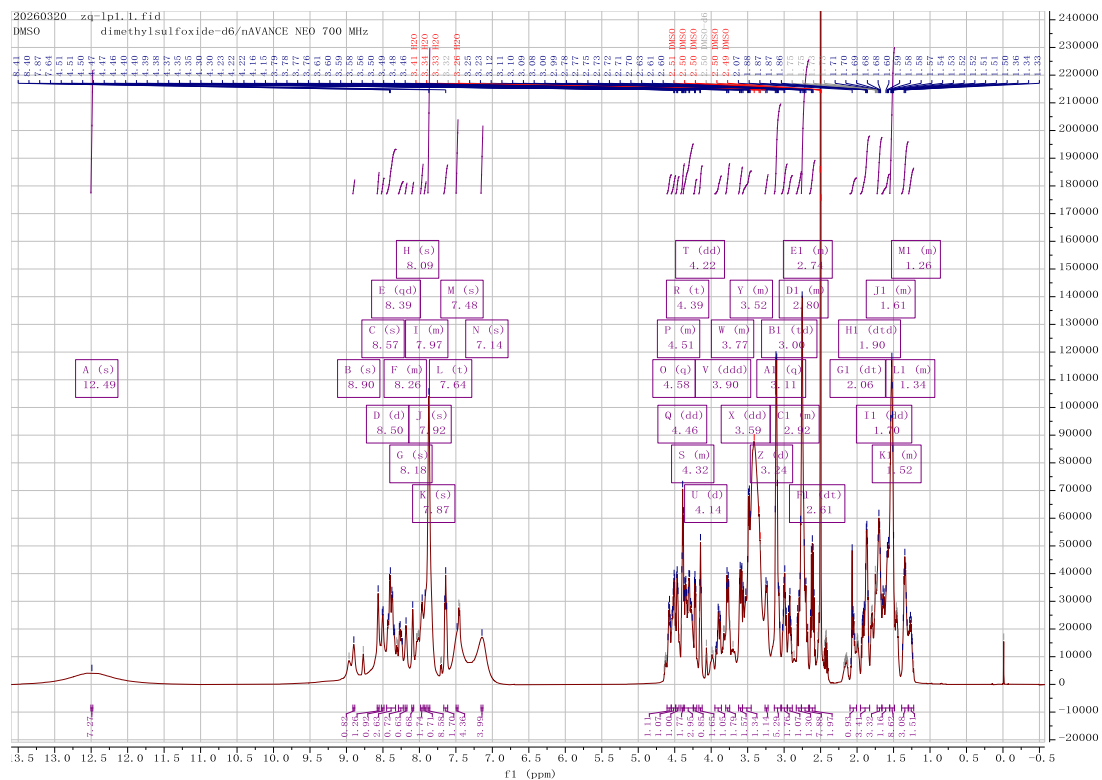

**Fig S259.**  $^1\text{H}$ - $^1\text{H}$  COSY spectrum of L38.

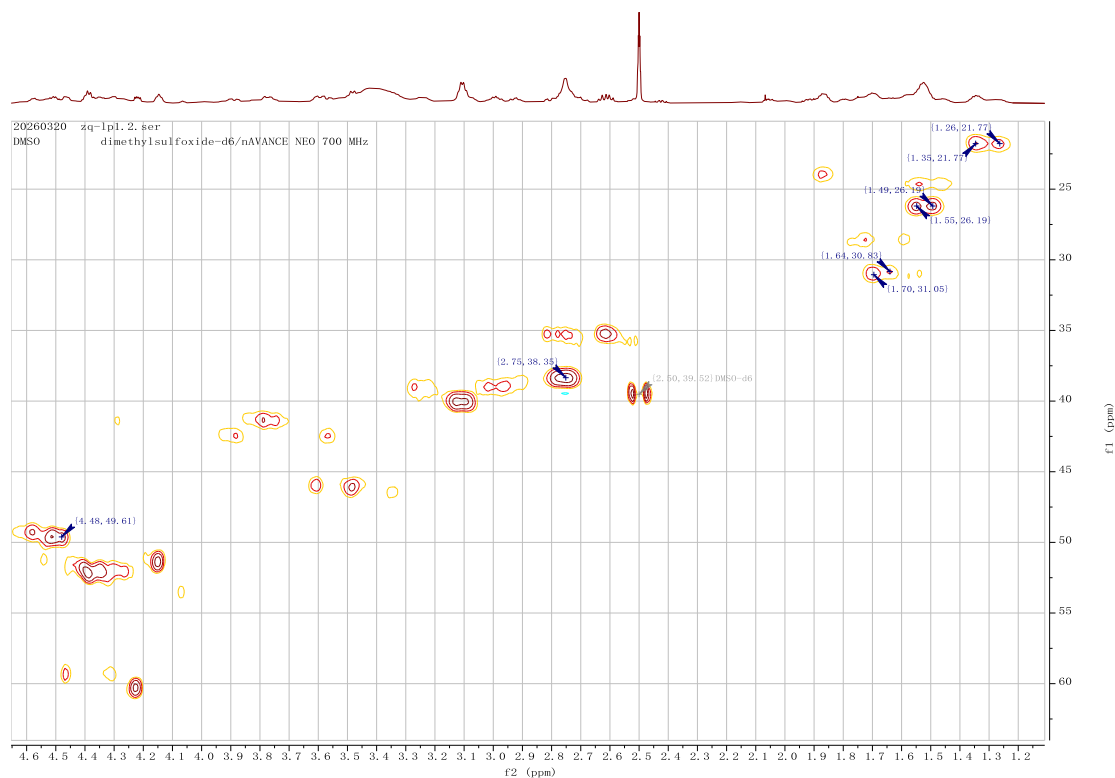

**Fig S260.** HSQC spectrum of L38. The annotated cross-peaks specifically highlight the  $^1\text{H}$  and  $^{13}\text{C}$  chemical shifts assigned to the Lysine (Lys) residue. Values next to the peaks are given in ppm.

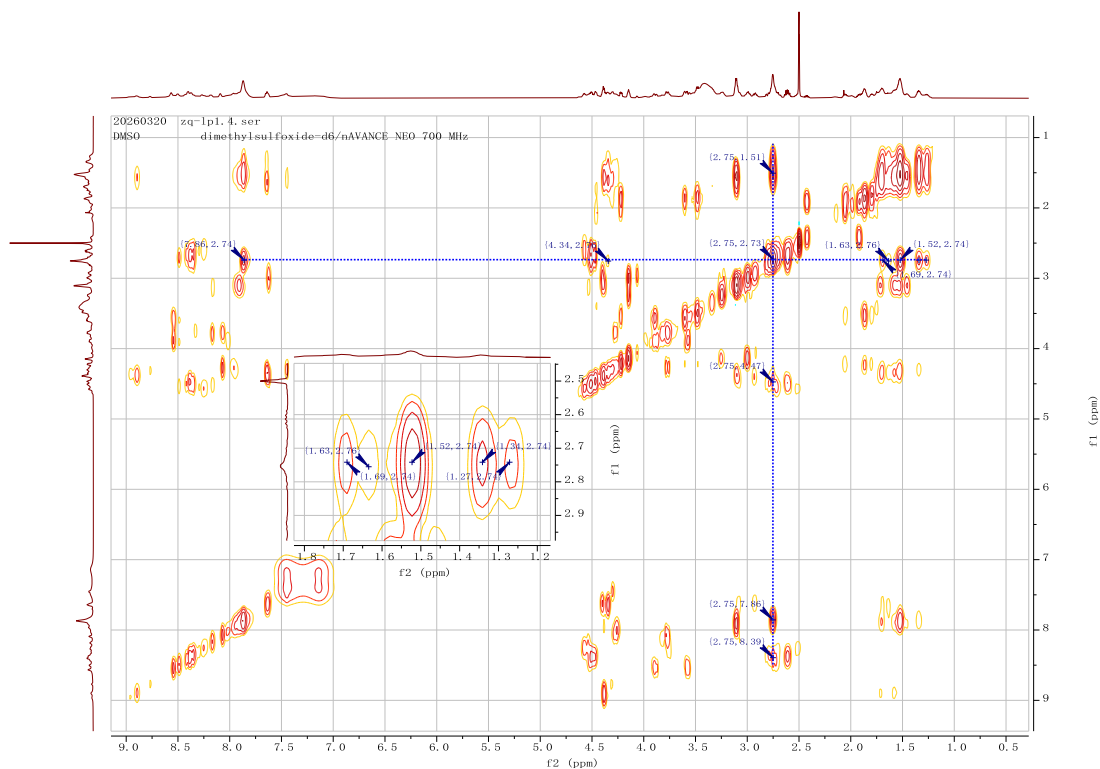

**Fig S261.** TOCSY spectrum of **L38**. Dashed lines trace the spin systems of Lys (blue). Annotated values represent chemical shifts (ppm).

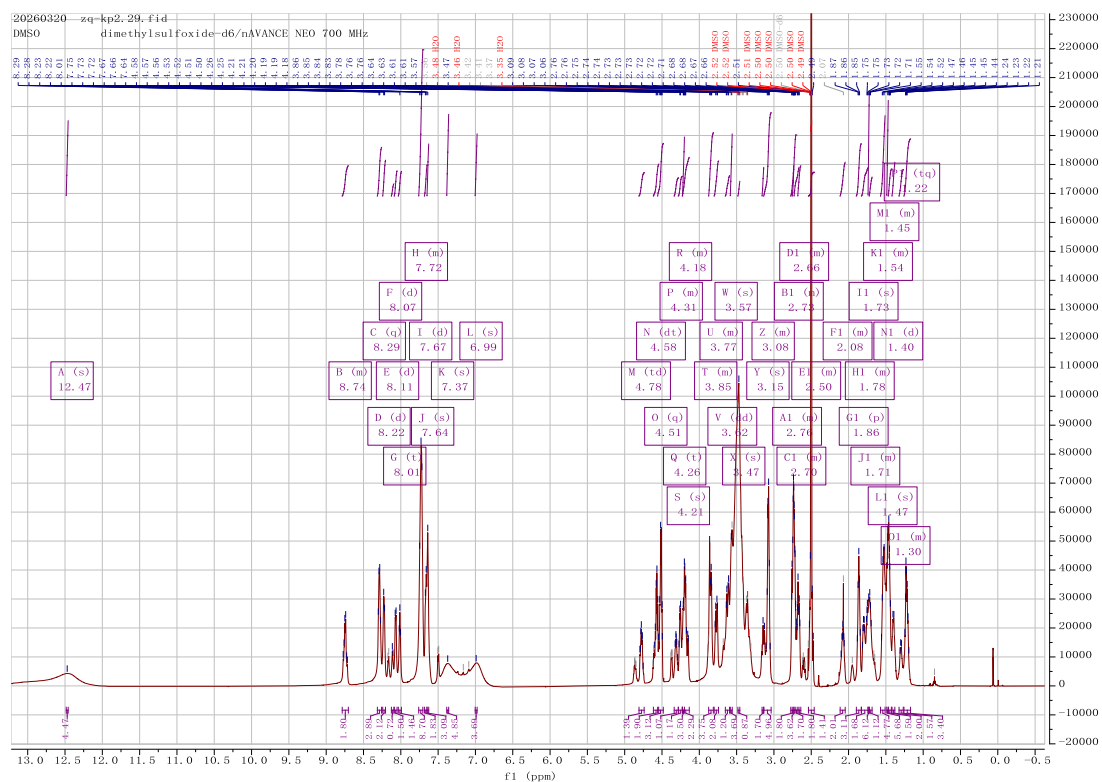

**Fig S262.**  $^1\text{H}$  spectrum of **B38a**.

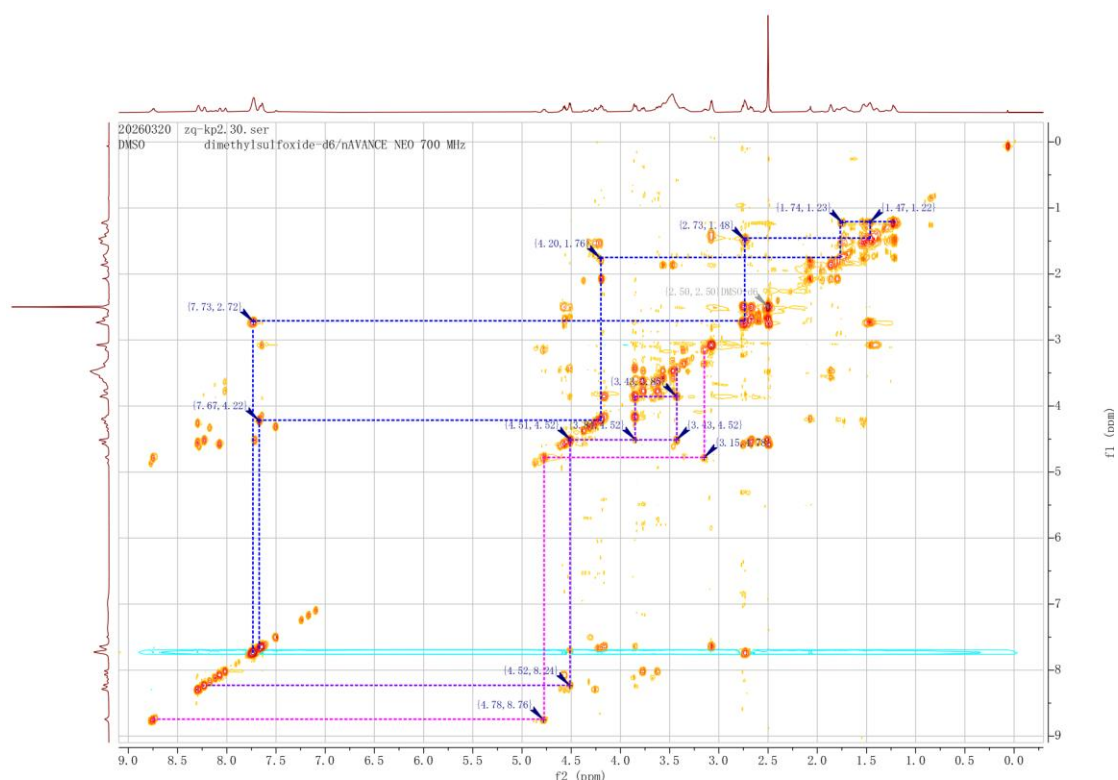

**Fig S263.**  $^1\text{H}$ - $^1\text{H}$  COSY spectrum of **B38a**. Dashed lines trace the spin systems of Cys1 (pink), Lys5 (blue), and Cys9 (purple). Annotated values represent chemical shifts (ppm).

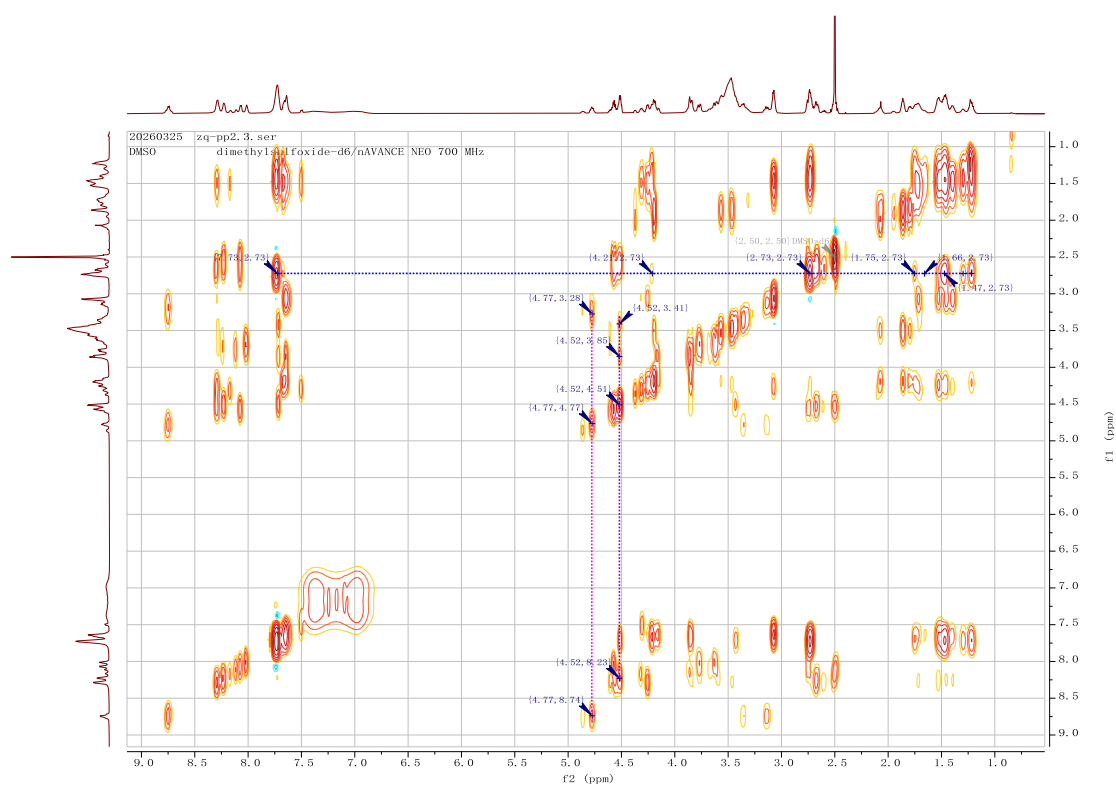

**Fig S264.** TOCSY spectrum of **B38a**. Dashed lines trace the spin systems of Cys1 (pink), Lys5 (blue), and Cys9 (purple). Annotated values represent chemical shifts (ppm).

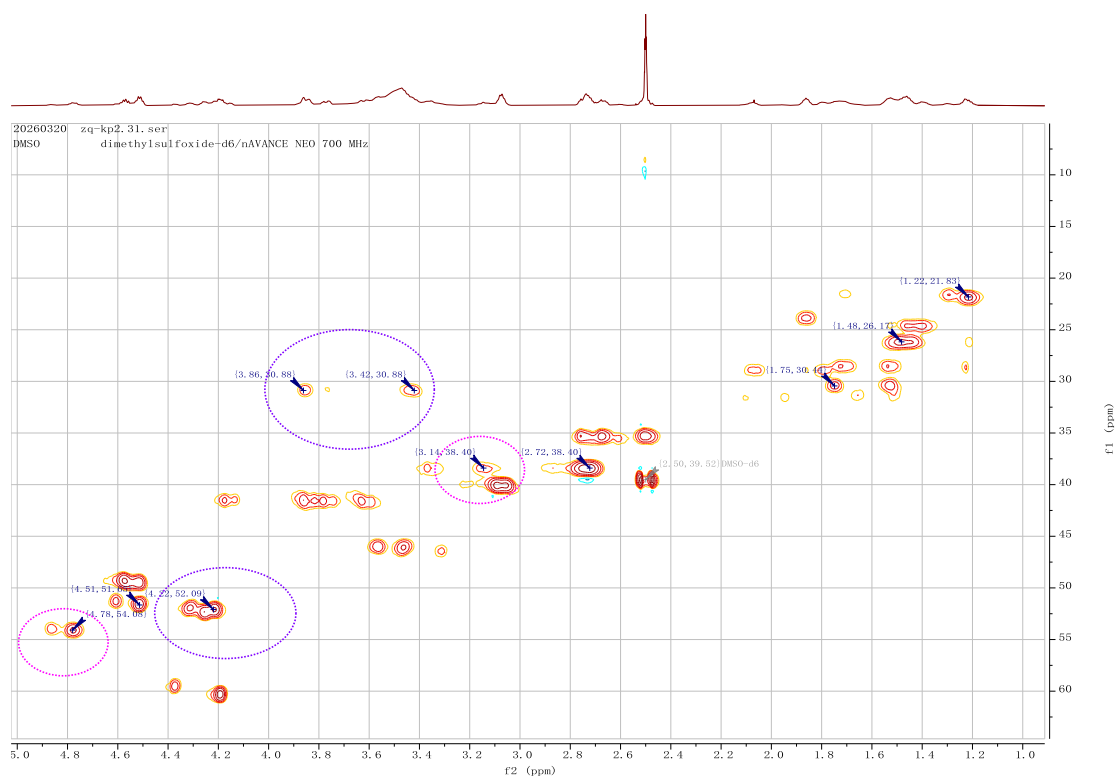

**Fig S265.** HSQC spectrum of **B38a**. Colored dashed ovals highlight specific cross-peaks: purple for Cys9, and pink for Cys1. Annotated values represent chemical shifts in ppm.

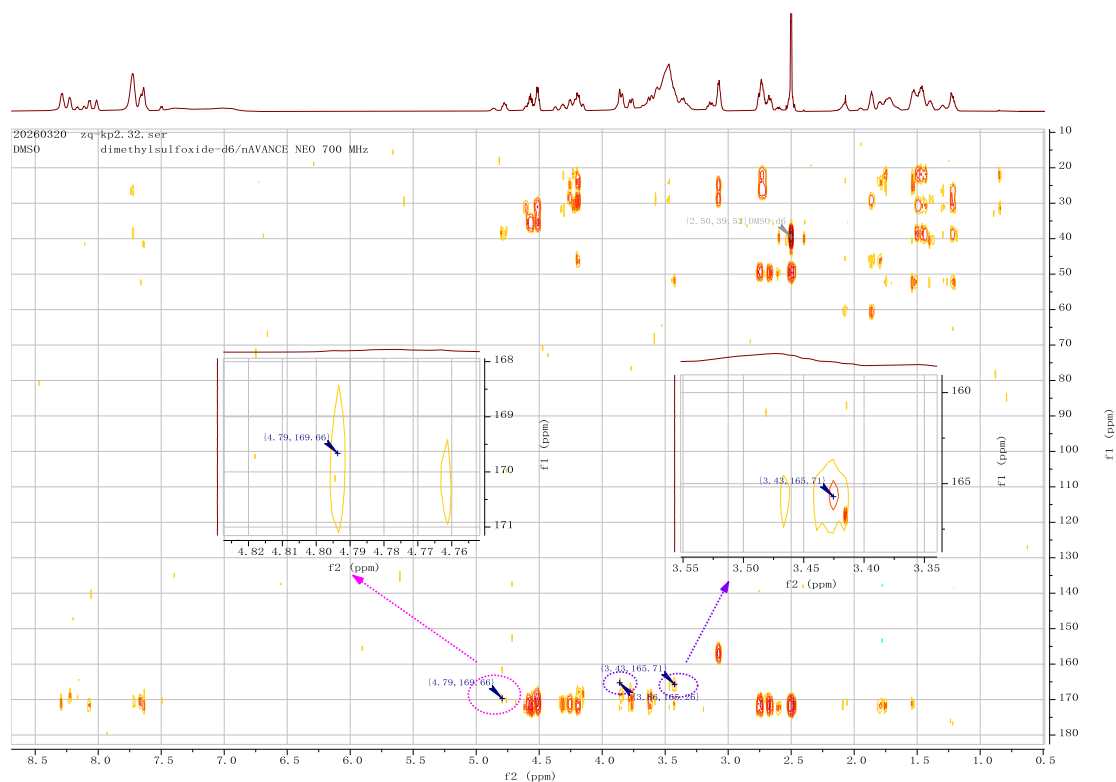

**Fig S266.** HMBC spectrum of **B38a**. Colored dashed ovals highlight specific cross-peaks: purple for Cys10, and pink for Cys1. Annotated values represent chemical shifts in ppm.



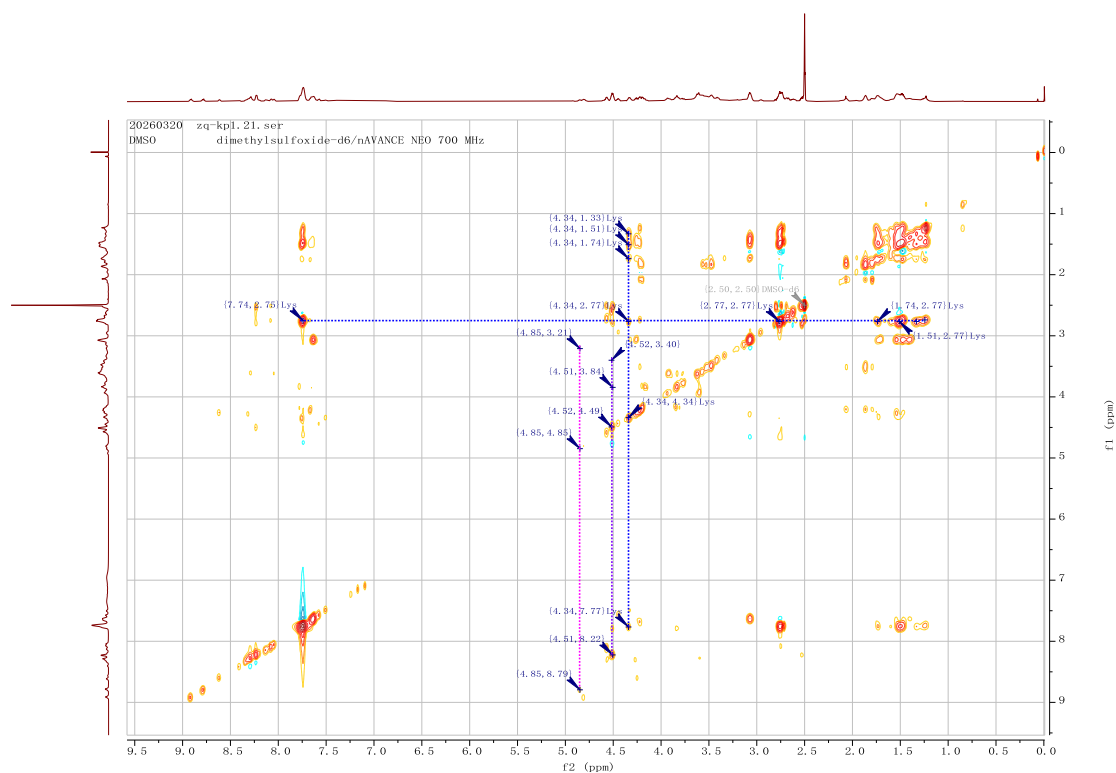

**Fig S269.** TOCSY spectrum of **B38b**. Dashed lines trace the spin systems of Cys1 (pink), Lys5 (blue), and Cys9 (purple). Annotated values represent chemical shifts (ppm).

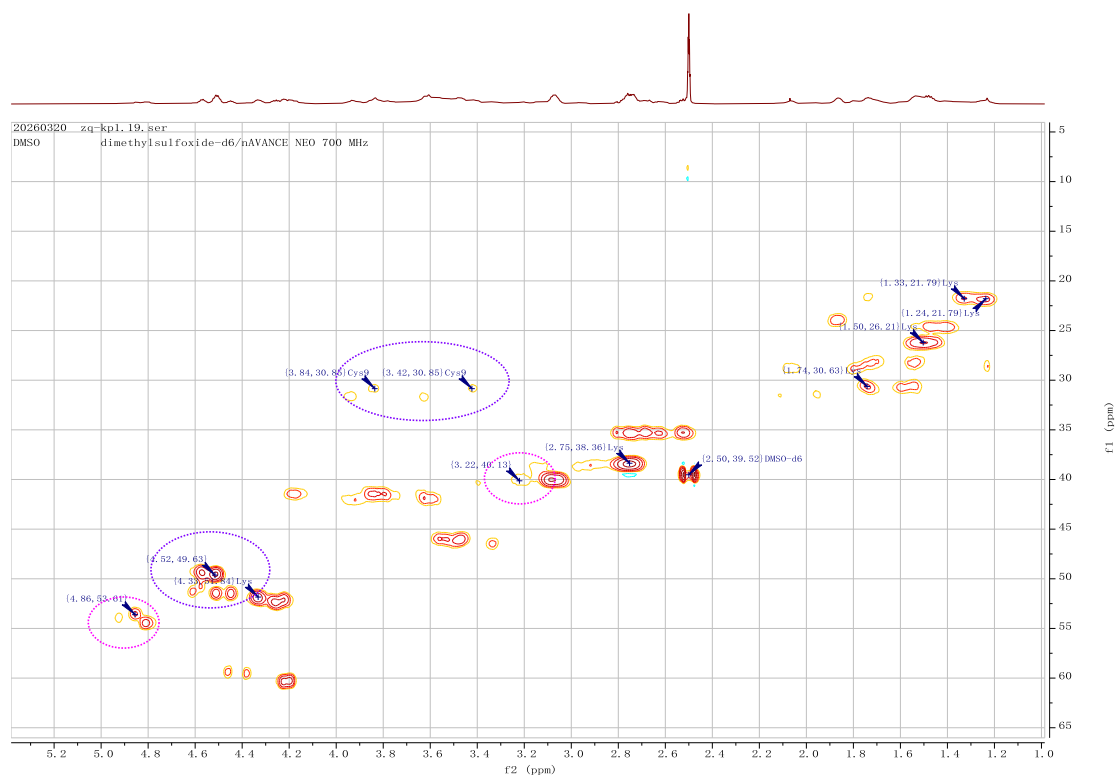

**Fig S270.** HSQC spectrum of **B38b**. Colored dashed ovals highlight specific cross-peaks: purple for Cys9, and pink for Cys1. Annotated values represent chemical shifts in ppm.

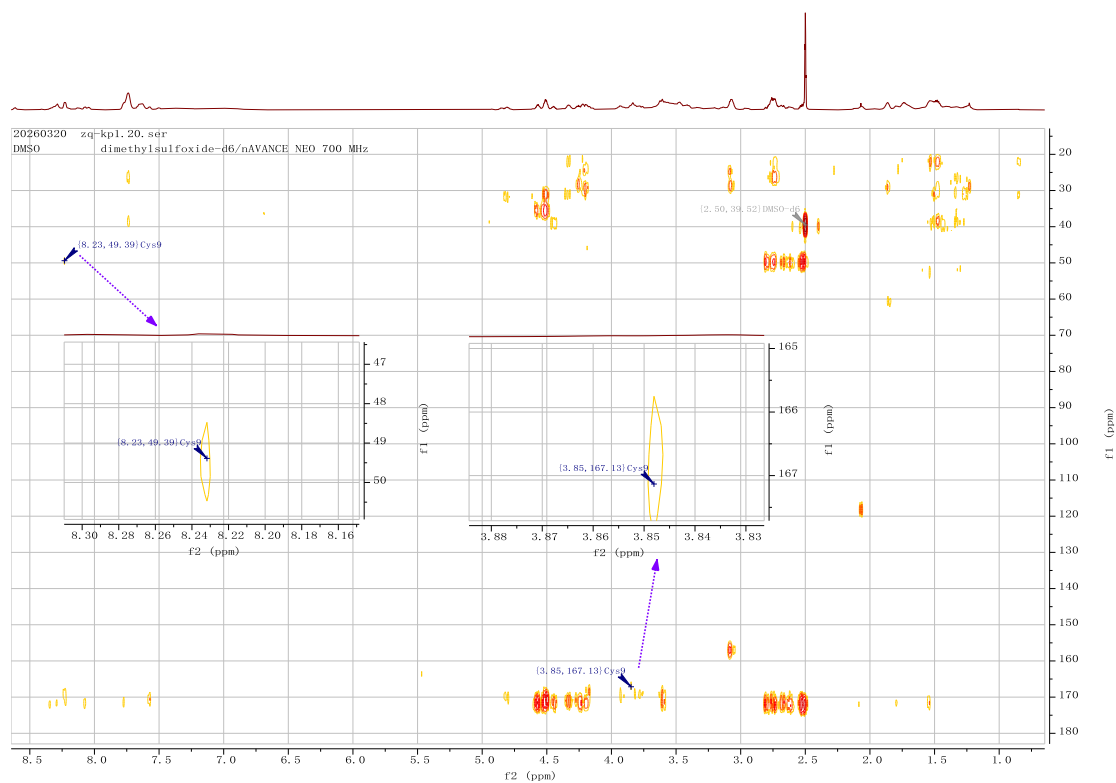

**Fig S271.** HMBC spectrum of **B38b**. Colored dashed ovals highlight specific cross-peaks: purple for Cys9. Annotated values represent chemical shifts in ppm.

## 11. Reference

1. Bao, G. *et al.* Dimethyl sulfoxide/visible-light mediated chemoselective C–S bond formation between tryptophans and thiophenols enables site-selective functionalization of peptides. *CCS Chem* **6**, 1547–1556 (2024).
